# Supplementary material for: Transcriptomic Changes in Internode Explants of Stinging Nettle during Callogenesis
Source: MDPI journal article supplement (doi:10.3390/ijms222212319), 2021-11-15
Supplement: s1 [file s1]

|            |      | NAA (mg/L) |     |     |   |   |
|------------|------|------------|-----|-----|---|---|
|            |      | 0.01       | 0.1 | 0.5 | 1 | 3 |
| BAP (mg/L) | 3    |            |     |     |   |   |
|            | 1    |            |     |     |   |   |
|            | 0.5  |            |     |     |   |   |
|            | 0.1  |            |     |     |   |   |
|            | 0.01 |            |     |     |   |   |

**Figure S1.** Scheme showing the combination of different concentrations of BAP and NAA.
