# Supplementary material for: Transcriptomic Changes in Internode Explants of Stinging Nettle during Callogenesis
Source: Int J Mol Sci. 2021 Nov 15;22(22):12319. doi: 10.3390/ijms222212319 (PMC8618292; doi:10.3390/ijms222212319)
Supplement: Supplementary file 1 [file ijms-22-12319-s001.zip › Dataset S1_latest.xlsx]

## Sheet: RNA-Seq results
Feature ID	Experiment - Range (original values)	Experiment - IQR (original values)	Experiment - Difference (original values)	Experiment - Fold Change (original values)	ANOVA original values - Max difference	ANOVA original values - Max fold change	ANOVA original values - Test statistic	ANOVA original values - P-value	ANOVA original values - FDR p-value correction	Annotations - Target description	Annotations - Strand	Annotations - Annotation notes	Annotations - Source reference id	Annotations - Annotation description	Annotations - Category	Annotations - Gene symbol	0D - 0D repl 1 (paired) trimmed (paired) trimmed (paired) trimmed (paired) (GE) - Expression values	0D - 0D repl 1 (paired) trimmed (paired) trimmed (paired) trimmed (paired) (GE) - Unique gene reads	0D - 0D repl 1 (paired) trimmed (paired) trimmed (paired) trimmed (paired) (GE) - Total gene reads	0D - 0D repl 1 (paired) trimmed (paired) trimmed (paired) trimmed (paired) (GE) - RPKM	0D - 0D repl 1 (paired) trimmed (paired) trimmed (paired) trimmed (paired) (GE) - Chromosome	0D - 0D repl 1 (paired) trimmed (paired) trimmed (paired) trimmed (paired) (GE) - Chromosome region start	0D - 0D repl 1 (paired) trimmed (paired) trimmed (paired) trimmed (paired) (GE) - Chromosome region end	0D - 0D repl 2 (paired) trimmed (paired) trimmed (paired) trimmed (paired) (GE) - Expression values	0D - 0D repl 2 (paired) trimmed (paired) trimmed (paired) trimmed (paired) (GE) - Unique gene reads	0D - 0D repl 2 (paired) trimmed (paired) trimmed (paired) trimmed (paired) (GE) - Total gene reads	0D - 0D repl 2 (paired) trimmed (paired) trimmed (paired) trimmed (paired) (GE) - RPKM	0D - 0D repl 2 (paired) trimmed (paired) trimmed (paired) trimmed (paired) (GE) - Chromosome	0D - 0D repl 2 (paired) trimmed (paired) trimmed (paired) trimmed (paired) (GE) - Chromosome region start	0D - 0D repl 2 (paired) trimmed (paired) trimmed (paired) trimmed (paired) (GE) - Chromosome region end	0D - 0D repl 3 (paired) trimmed (paired) trimmed (paired) trimmed (paired) (GE) - Expression values	0D - 0D repl 3 (paired) trimmed (paired) trimmed (paired) trimmed (paired) (GE) - Unique gene reads	0D - 0D repl 3 (paired) trimmed (paired) trimmed (paired) trimmed (paired) (GE) - Total gene reads	0D - 0D repl 3 (paired) trimmed (paired) trimmed (paired) trimmed (paired) (GE) - RPKM	0D - 0D repl 3 (paired) trimmed (paired) trimmed (paired) trimmed (paired) (GE) - Chromosome	0D - 0D repl 3 (paired) trimmed (paired) trimmed (paired) trimmed (paired) (GE) - Chromosome region start	0D - 0D repl 3 (paired) trimmed (paired) trimmed (paired) trimmed (paired) (GE) - Chromosome region end	0D - Means	1D - 1D repl 1 (paired) trimmed (paired) trimmed (paired) trimmed (paired) (GE) - Expression values	1D - 1D repl 1 (paired) trimmed (paired) trimmed (paired) trimmed (paired) (GE) - Unique gene reads	1D - 1D repl 1 (paired) trimmed (paired) trimmed (paired) trimmed (paired) (GE) - Total gene reads	1D - 1D repl 1 (paired) trimmed (paired) trimmed (paired) trimmed (paired) (GE) - RPKM	1D - 1D repl 1 (paired) trimmed (paired) trimmed (paired) trimmed (paired) (GE) - Chromosome	1D - 1D repl 1 (paired) trimmed (paired) trimmed (paired) trimmed (paired) (GE) - Chromosome region start	1D - 1D repl 1 (paired) trimmed (paired) trimmed (paired) trimmed (paired) (GE) - Chromosome region end	1D - 1D repl 2 (paired) trimmed (paired) trimmed (paired) trimmed (paired) (GE) - Expression values	1D - 1D repl 2 (paired) trimmed (paired) trimmed (paired) trimmed (paired) (GE) - Unique gene reads	1D - 1D repl 2 (paired) trimmed (paired) trimmed (paired) trimmed (paired) (GE) - Total gene reads	1D - 1D repl 2 (paired) trimmed (paired) trimmed (paired) trimmed (paired) (GE) - RPKM
contig_722	5472.49	3949.63	4898.09	12.3178	4898.09	12.3178	61.7698	7.09799e-06	8.94514e-05	basic endochitinase	835	gi|5689118|dbj|BAA82818.1|basic endochitinase [Arabidopsis thaliana]	76.50%	BAA82818.1	"chitinase activity;extracellular region;cell wall;vacuolar membrane;cytosol;carbohydrate metabolic process;amino sugar metabolic process;macromolecule catabolic process;jasmonic acid and ethylene-dependent systemic resistance, ethylene mediated signaling pathway;response to cadmium ion;defense response to fungus"		451.94	4003	4003	451.94	contig_722	0	835	564.239	4083	4083	564.239	contig_722	0	835	443.209	3768	3768	443.209	contig_722	0	835	486.463	538.983	3961	3961	538.983	contig_722	0	835	357.455	2339	2339	357.455
contig_205	2636.76	1928.95	2230.21	4.05174	2230.21	4.05174	72.3608	3.87105e-06	5.7598e-05	senescence-associated gene 21	761	"gi|75207422|sp|Q9SRX6.1|LEA2_ARATHRecName: Full=Late embryogenis abundant protein 2/gi|21618083|gb|AAM67133.1|late embryogenis abundant protein, putative [Arabidopsis thaliana]/gi|1032304114|gb|OAP18439.1|LEA3 [Arabidopsis thaliana]/gi|6056420|gb|AAF02884.1|AC009525_18Similar to late embryogenis abundant protein 5 [Arabidopsis thaliana]/gi|332189354|gb|AEE27475.1|Late embryogenesis abundant 3 (L…	73.90%	NP_171781.1;AAM67133.1;BAD44510.1;OAP18439.1;ABD57466.1;Q9SRX6.1;AAF02884.1;AEE27475.1	response to reactive oxygen species;mitochondrion;cytosol;defense response;response to cold;chloroplast;response to insect;response to absence of light;response to ethylene;response to abscisic acid;embryo development ending in seed dormancy;leaf senescence;cellular response to water deprivation	LEA3	923.889	7458	7458	923.889	contig_205	0	761	919.334	6063	6063	919.334	contig_205	0	761	882.012	6834	6834	882.012	contig_205	0	761	908.412	857.753	5745	5745	857.753	contig_205	0	761	614.228	3663	3663	614.228
contig_477	2166.36	1826.84	2032.75	5.96422	2032.75	5.96422	233.646	3.97245e-08	2.44542e-06	At5g41860	743	gi|50253568|gb|AAT71986.1|At5g41860 [Arabidopsis thaliana]	61.00%	AAT71986.1			521.984	4114	4114	521.984	contig_477	0	743	645.597	4157	4157	645.597	contig_477	0	743	543.297	4110	4110	543.297	contig_477	0	743	570.293	423.745	2771	2771	423.745	contig_477	0	743	343.322	1999	1999	343.322
contig_3462	2026.8	1662.27	1877.44	24.8002	1877.44	24.8002	149.77	2.28851e-07	7.76085e-06	germin	787	gi|4666250|dbj|BAA77208.1|germin-like protein 2 precursor [Arabidopsis thaliana]/gi|5824339|emb|CAB54516.1|GER3 protein [Arabidopsis thaliana]/gi|2239042|emb|CAA73213.1|GLP3 protein [Arabidopsis thaliana]/gi|1755164|gb|AAB51571.1|germin-like protein [Arabidopsis thaliana]/gi|14517364|gb|AAK62573.1|AT5g20630/T1M15_30 [Arabidopsis thaliana]/gi|1755168|gb|AAB51573.1|germin-like protein [Arabidopsis …	61.70%	NP_197563.1;CAA73213.1;CAB54516.1;AAL06953.1;P94072.1;AAK62573.1;AAB51573.1;AAB51571.1;BAA77208.1;AED92868.1	nucleus;response to cold;plant-type cell wall;response to cytokinin;cellular process;extracellular matrix;apoplast;oxalate oxidase activity	GER3	83.2515	695	695	83.2515	contig_3462	0	787	86.5063	590	590	86.5063	contig_3462	0	787	66.892	536	536	66.892	contig_3462	0	787	78.8833	262.035	1815	1815	262.035	contig_3462	0	787	347.152	2141	2141	347.152
contig_719	2024.74	1624.32	-1729.37	-7.79835	-1729.37	-7.79835	45.3018	2.29756e-05	0.000212497	---NA---	577						1900.96	11634	11635	1900.96	contig_719	0	577	2107.23	10535	10537	2107.23	contig_719	0	577	1943.05	11413	11415	1943.05	contig_719	0	577	1983.75	498.394	2529	2531	498.394	contig_719	0	577	82.4918	373	373	82.4918
contig_648	2492.37	1739.97	-2272.82	-6.10249	-2272.82	-6.10249	78.8639	2.7793e-06	4.5145e-05	dormancy-associated -like 1	380	gi|1032304673|gb|OAP18998.1|DYL1 [Arabidopsis thaliana]/gi|18491109|gb|AAL69521.1|At1g28330/F3H9_1 [Arabidopsis thaliana]/gi|18396748|ref|NP_564305.1|dormancy-associated protein-like 1 [Arabidopsis thaliana]/gi|14335096|gb|AAK59827.1|At1g28330/F3H9_1 [Arabidopsis thaliana]/gi|2995990|gb|AAC26202.1|dormancy-associated protein [Arabidopsis thaliana]/gi|2995992|gb|AAC26203.1|dormancy-associated prot…	67.60%	OAP18998.1;NP_564305.1;AEE30954.1;AAC26203.1;AAK59827.1;AAC26202.1;AAF98422.1;AAL69521.1	response to sucrose;response to glucose;response to fructose	DYL1	2727.43	10994	10994	2727.43	contig_648	0	380	2626.35	8649	8649	2626.35	contig_648	0	380	2800.98	10837	10837	2800.98	contig_648	0	380	2718.25	615.943	2060	2060	615.943	contig_648	0	380	308.61	919	919	308.61
contig_30073	1537.04	1062.07	1292.34	11.4876	1292.34	11.4876	92.5794	1.49509e-06	2.89455e-05	Peroxidase superfamily	336	gi|21592403|gb|AAM64354.1|peroxidase [Arabidopsis thaliana]	77.90%	AAM64354.1	mRNA binding;peroxidase activity;Golgi apparatus;plasma membrane;response to oxidative stress;plant-type cell wall;plasmodesma;plant-type cell wall organization;lignin metabolic process;heme binding;hydrogen peroxide catabolic process;respiratory burst;metal ion binding;apoplast;rhythmic process;defense response to fungus;oxidation-reduction process;cellular oxidant detoxification		210.428	743	750	210.428	contig_30073	0	336	171.025	496	498	171.025	contig_30073	0	336	161.94	548	554	161.94	contig_30073	0	336	181.131	190.044	553	562	190.044	contig_30073	0	336	75.1975	196	198	75.1975
contig_10799	3486.85	1611.02	2461.15	4.90989	2461.15	4.90989	14.6807	0.00128679	0.00468861	---NA---	395						579.712	2429	2429	579.712	contig_10799	0	395	762.162	2609	2609	762.162	contig_10799	0	395	546.531	2198	2198	546.531	contig_10799	0	395	629.468	2471.17	8591	8591	2471.17	contig_10799	0	395	2767.31	8566	8566	2767.31
contig_1278	1676.96	831.812	1151.5	13.186	1151.5	13.186	13.8293	0.001568	0.00549655	Wound-responsive family	521	gi|28416769|gb|AAO42915.1|At4g10262 [Arabidopsis thaliana]/gi|26450739|dbj|BAC42478.1|unknown protein [Arabidopsis thaliana]/gi|1032285353|gb|OAO99680.1|hypothetical protein AXX17_AT4G11510 [Arabidopsis thaliana]/gi|332657461|gb|AEE82861.1|Wound-responsive family protein [Arabidopsis thaliana]/gi|30681389|ref|NP_849355.1|Wound-responsive family protein [Arabidopsis thaliana]	68.20%	AAO42915.1;BAC42478.1;AEE82861.1;OAO99680.1;NP_849355.1	nucleus;response to wounding	AT4G10265	86.4913	478	478	86.4913	contig_1278	0	521	62.0141	280	280	62.0141	contig_1278	0	521	134.977	716	716	134.977	contig_1278	0	521	94.4941	345.223	1583	1583	345.223	contig_1278	0	521	524.393	2141	2141	524.393
contig_8229	1350.08	1027.8	1060.36	10.1648	1060.36	10.1648	35.6685	5.59947e-05	0.000411852	basic endochitinase	383	gi|1032288073|gb|OAP02400.1|PR3 [Arabidopsis thaliana]	85.00%	OAP02400.1	"polysaccharide catabolic process;chitinase activity;extracellular region;vacuolar membrane;cytosol;chitin catabolic process;chitin binding;plant-type hypersensitive response;jasmonic acid and ethylene-dependent systemic resistance, ethylene mediated signaling pathway;cell wall macromolecule catabolic process;killing of cells of other organism;response to cadmium ion;defense response to fungus"		120.117	488	488	120.117	contig_8229	0	383	120.814	401	401	120.814	contig_8229	0	383	106.166	414	414	106.166	contig_8229	0	383	115.699	190.752	643	643	190.752	contig_8229	0	383	145.6	437	437	145.6
contig_21555	1468.46	579.788	1140.56	1012.96	1140.56	1012.96	26.5673	0.000164044	0.00093512	Auxin-responsive GH3 family	402	gi|1032294441|gb|OAP08767.1|GH3.1 [Arabidopsis thaliana]	91.10%	OAP08767.1	chloroplast;auxin-activated signaling pathway;unidimensional cell growth;auxin homeostasis;indole-3-acetic acid amido synthetase activity		0.938028	4	4	0.938028	contig_21555	0	402	0	0	0	0	contig_21555	0	402	2.4432	10	10	2.4432	contig_21555	0	402	1.12707	494.334	1740	1749	494.334	contig_21555	0	402	694.542	2166	2188	694.542
contig_1301	8926.48	6590.06	7671.31	16.4104	7671.31	16.4104	124.299	4.74844e-07	1.29965e-05	---NA---	680						521.406	3380	3761	521.406	contig_1301	0	680	519.767	2781	3063	519.767	contig_1301	0	680	452.229	2820	3131	452.229	contig_1301	0	680	497.801	9378.7	51774	56130	9378.7	contig_1301	0	680	7393.75	36129	39400	7393.75
contig_15132	1045.36	659.512	894.988	16.6395	894.988	16.6395	63.736	6.2971e-06	8.22725e-05	germin	665	gi|4666250|dbj|BAA77208.1|germin-like protein 2 precursor [Arabidopsis thaliana]/gi|5824339|emb|CAB54516.1|GER3 protein [Arabidopsis thaliana]/gi|2239042|emb|CAA73213.1|GLP3 protein [Arabidopsis thaliana]/gi|1755164|gb|AAB51571.1|germin-like protein [Arabidopsis thaliana]/gi|14517364|gb|AAK62573.1|AT5g20630/T1M15_30 [Arabidopsis thaliana]/gi|1755168|gb|AAB51573.1|germin-like protein [Arabidopsis …	65.60%	NP_197563.1;CAA73213.1;CAB54516.1;AAL06953.1;P94072.1;AAK62573.1;AAB51573.1;AAB51571.1;BAA77208.1;AED92868.1	nucleus;response to cold;plant-type cell wall;response to cytokinin;extracellular matrix;oxalate metabolic process;oxalate decarboxylase activity;apoplast;oxalate oxidase activity	GER3	65.7776	464	464	65.7776	contig_15132	0	665	60.5583	349	349	60.5583	contig_15132	0	665	45.342	307	307	45.342	contig_15132	0	665	57.226	240.055	1405	1405	240.055	contig_15132	0	665	348.475	1816	1816	348.475
contig_6620	1093.29	467.552	839.546	691.712	839.546	691.712	24.0319	0.000234923	0.00123194	Auxin-responsive GH3 family	822	gi|15227787|ref|NP_179898.1|Auxin-responsive GH3 family protein [Arabidopsis thaliana]/gi|2642446|gb|AAB87114.1|unknown protein [Arabidopsis thaliana]/gi|62900125|sp|O22190.1|GH33_ARATHRecName: Full=Indole-3-acetic acid-amido synthetase GH3.3 AltName: Full=Auxin-responsive GH3-like protein 3 Short=AtGH3-3/gi|19699328|gb|AAL91274.1|At2g23170/T20D16.20 [Arabidopsis thaliana]/gi|23463057|gb|AAN33198…	86.40%	AAB87114.1;AEC07424.1;AAL91274.1;AAN33198.1;NP_179898.1;O22190.1	cytoplasm;response to auxin;auxin homeostasis;indole-3-acetic acid amido synthetase activity	GH3.3	1.37623	12	12	1.37623	contig_6620	0	822	0	0	0	0	contig_6620	0	822	2.27021	19	19	2.27021	contig_6620	0	822	1.21548	312.387	2260	2260	312.387	contig_6620	0	822	464.48	2992	2992	464.48
contig_658	1054.26	586.57	666.981	4.98558	666.981	4.98558	15.8511	0.00099541	0.00382574	2-oxoglutarate (2OG) and Fe(II)-dependent oxygenase superfamily	1336	gi|11994563|dbj|BAB02603.1|leucoanthocyanidin dioxygenase-like protein [Arabidopsis thaliana]/gi|332641861|gb|AEE75382.1|2-oxoglutarate (2OG) and Fe(II)-dependent oxygenase superfamily protein [Arabidopsis thaliana]/gi|62320500|dbj|BAD95049.1|hypothetical protein [Arabidopsis thaliana]/gi|1032287403|gb|OAP01730.1|F6'H1 [Arabidopsis thaliana]/gi|75311178|sp|Q9LHN8.1|F6H1_ARATHRecName: Full=Feruloy…	66.30%	NP_187970.1;BAD95049.1;OAP01730.1;AEE75382.1;Q9LHN8.1;AAS49108.1;BAB02603.1	"cytoplasm;coumarin biosynthetic process;hydrogen peroxide-mediated programmed cell death;oxidoreductase activity, acting on paired donors, with incorporation or reduction of molecular oxygen, 2-oxoglutarate as one donor, and incorporation of one atom each of oxygen into both donors;metal ion binding;oxidation-reduction process;cellular response to iron ion;cellular response to ethylene stimulus;…	AT3G13610	181.346	2570	2570	181.346	contig_658	0	1336	196.319	2272	2273	196.319	contig_658	0	1336	189.155	2572	2573	189.155	contig_658	0	1336	188.94	104.521	1229	1229	104.521	contig_658	0	1336	191.889	2009	2009	191.889
contig_13150	1514.27	985.216	1292.56	4.51704	1292.56	4.51704	51.7626	1.38982e-05	0.000146315	---NA---	354						368.832	1385	1385	368.832	contig_13150	0	354	364.426	1118	1118	364.426	contig_13150	0	354	369.283	1331	1331	369.283	contig_13150	0	354	367.513	1522.64	4744	4744	1522.64	contig_13150	0	354	1578.88	4380	4380	1578.88
contig_6344	935.503	571.893	658.214	8.56473	658.214	8.56473	13.5348	0.00168287	0.00582724	---NA---	526						255.932	1428	1428	255.932	contig_6344	0	526	106.835	487	487	106.835	contig_6344	0	526	310.521	1663	1663	310.521	contig_6344	0	526	224.429	153.582	711	711	153.582	contig_6344	0	526	37.3605	154	154	37.3605
contig_752	829.759	743.644	727.127	68.2606	727.127	68.2606	72.2568	3.8925e-06	5.78223e-05	---NA---	458						8.23335	40	40	8.23335	contig_752	0	458	15.6206	62	62	15.6206	contig_752	0	458	8.57786	40	40	8.57786	contig_752	0	458	10.8106	33.9869	137	137	33.9869	contig_752	0	458	32.3199	116	116	32.3199
contig_2377	935.142	540.187	712.552	221.868	712.552	221.868	34.4194	6.38644e-05	0.000454547	Serine protease potato inhibitor I-type family	524	gi|10178197|dbj|BAB11621.1|unnamed protein product [Arabidopsis thaliana]/gi|110738573|dbj|BAF01212.1|hypothetical protein [Arabidopsis thaliana]	61.50%	BAB11621.1;BAF01212.1	defense response to insect;cell wall;defense response to fungus		3.41825	19	19	3.41825	contig_2377	0	524	1.76169	8	8	1.76169	contig_2377	0	524	4.49846	24	24	4.49846	contig_2377	0	524	3.22614	15.1783	70	70	15.1783	contig_2377	0	524	14.6116	60	60	14.6116
contig_512	980.977	675.851	762.031	51.1246	762.031	51.1246	22.1303	0.00031465	0.00153769	2-aminoethanethiol (DUF1637)	612	gi|10176982|dbj|BAB10214.1|unnamed protein product [Arabidopsis thaliana]	63.50%	BAB10214.1	nucleus;cytosol;anaerobic respiration;peptidyl-cysteine oxidation;detection of hypoxia		13.2474	86	86	13.2474	contig_512	0	612	7.16477	38	38	7.16477	contig_512	0	612	25.1961	157	157	25.1961	contig_512	0	612	15.2027	110.65	596	596	110.65	contig_512	0	612	184.114	883	883	184.114
contig_2811	1237.28	910.504	-1084.65	-5.72144	-1084.65	-5.72144	94.4066	1.38596e-06	2.74471e-05	---NA---	604						1239.43	7941	7941	1239.43	contig_2811	0	604	1394.05	7297	7297	1394.05	contig_2811	0	604	1309.66	8054	8054	1309.66	contig_2811	0	604	1314.38	283.487	1507	1507	283.487	contig_2811	0	604	156.763	742	742	156.763
contig_16644	839.461	359.763	669.368	812.656	669.368	812.656	27.0119	0.000154522	0.000892532	Auxin-responsive GH3 family	470	gi|1032294441|gb|OAP08767.1|GH3.1 [Arabidopsis thaliana]	83.90%	OAP08767.1	cytoplasm;response to auxin;auxin homeostasis;indole-3-acetic acid amido synthetase activity		0.802314	4	4	0.802314	contig_16644	0	470	0	0	0	0	contig_16644	0	470	1.67177	8	8	1.67177	contig_16644	0	470	0.824694	269.063	1108	1113	269.063	contig_16644	0	470	415.947	1525	1532	415.947
contig_765	661.301	486.168	608.362	28.779	608.362	28.779	154.386	2.03152e-07	7.14277e-06	heat shock factor 6	493	gi|15227413|ref|NP_181700.1|heat shock transcription factor B3 [Arabidopsis thaliana]/gi|117958747|gb|ABK59681.1|At2g41690 [Arabidopsis thaliana]/gi|75277249|sp|O22230.1|HSFB3_ARATHRecName: Full=Heat stress transcription factor B-3 Short=AtHsfB3 AltName: Full=AtHsf-05/gi|2618703|gb|AAB84350.1|putative heat shock transcription factor [Arabidopsis thaliana]/gi|330254922|gb|AEC10016.1|heat shock tra…	73.10%	AAB84350.1;ABK59681.1;AEC10016.1;O22230.1;NP_181700.1	"transcription factor activity, sequence-specific DNA binding;nucleus;cytoplasm;transcription, DNA-templated;asymmetric cell division;response to heat;response to chitin;sequence-specific DNA binding;negative regulation of transcription, DNA-templated;response to cadmium ion"	HSFB3	16.6362	50	87	16.6362	contig_765	0	493	36.513	71	156	36.513	contig_765	0	493	12.551	32	63	12.551	contig_765	0	493	21.9001	176.077	386	764	176.077	contig_765	0	493	240.203	427	928	240.203
contig_9845	872.624	408.107	621.468	126.042	621.468	126.042	12.9055	0.00196574	0.00659546	glutathione S-transferase	334	gi|332641224|gb|AEE74745.1|glutathione S-transferase TAU 8 [Arabidopsis thaliana]/gi|21554248|gb|AAM63323.1|putative glutathione transferase [Arabidopsis thaliana]/gi|89111910|gb|ABD60727.1|At3g09270 [Arabidopsis thaliana]/gi|15232628|ref|NP_187538.1|glutathione S-transferase TAU 8 [Arabidopsis thaliana]/gi|75337546|sp|Q9SR36.1|GSTU8_ARATHRecName: Full=Glutathione S-transferase U8 Short=AtGSTU8 A…	77.10%	NP_187538.1;AAM63323.1;ABD60727.1;AAF14025.1;Q9SR36.1;AEE74745.1	glutathione transferase activity;cytosol;glutathione metabolic process;toxin catabolic process;response to toxic substance;response to salicylic acid;response to cadmium ion	GSTU8	7.33853	26	26	7.33853	contig_9845	0	334	3.45481	10	10	3.45481	contig_9845	0	334	4.11686	14	14	4.11686	contig_9845	0	334	4.97006	43.5432	128	128	43.5432	contig_9845	0	334	109.651	287	287	109.651
contig_19748	1073.5	248.068	831.689	130.774	831.689	130.774	24.3908	0.000222833	0.00118219	homeobox-leucine zipper 18	350	gi|1032294017|gb|OAP08343.1|HB17 [Arabidopsis thaliana]	76.20%	OAP08343.1	"transcription factor activity, sequence-specific DNA binding;nucleus;transcription, DNA-templated;regulation of transcription, DNA-templated;plasmodesma;shade avoidance;response to hormone;response to far red light;sequence-specific DNA binding;transcription regulatory region DNA binding"		4.57892	17	17	4.57892	contig_19748	0	350	7.91249	24	24	7.91249	contig_19748	0	350	6.73484	24	24	6.73484	contig_19748	0	350	6.40875	595.047	1833	1833	595.047	contig_19748	0	350	554.547	1521	1521	554.547
contig_83	625.362	391.062	563.485	7.62327	563.485	7.62327	94.2593	1.39438e-06	2.75238e-05	methylesterase PCR A	2043	gi|1032302070|gb|OAP16395.1|PMEPCRA [Arabidopsis thaliana]	64.10%	OAP16395.1	vacuolar membrane;cytosol;plasma membrane;plant-type cell wall;response to fungus;response to nematode;pectinesterase activity;pectinesterase inhibitor activity;apoplast;defense response to Gram-negative bacterium	PMEPCRA	75.4913	1636	1636	75.4913	contig_83	0	2043	106.184	1880	1880	106.184	contig_83	0	2043	73.5542	1530	1530	73.5542	contig_83	0	2043	85.0765	274.513	4936	4936	274.513	contig_83	0	2043	247.783	3967	3967	247.783
contig_490	1966.75	1042.35	1365.2	286.799	1365.2	286.799	18.0385	0.000641242	0.00270216	#NAME?	430	"gi|1755186|gb|AAB51582.1|germin-like protein, partial [Arabidopsis thaliana]"	80.10%	AAB51582.1	manganese ion binding;nutrient reservoir activity;apoplast		4.82321	22	22	4.82321	contig_490	0	430	4.02525	15	15	4.02525	contig_490	0	430	5.48185	23	24	5.48185	contig_490	0	430	4.77677	16.911	64	64	16.911	contig_490	0	430	2.96763	9	10	2.96763
contig_10801	598.604	365.139	558.784	35.6019	558.784	35.6019	189.1	9.15061e-08	4.20696e-06	cytochrome P450	876	gi|1032294731|gb|OAP09057.1|CYP734A1 [Arabidopsis thaliana]/gi|34365751|gb|AAQ65187.1|At2g26710 [Arabidopsis thaliana]/gi|110739335|dbj|BAF01580.1|putative cytochrome P450 [Arabidopsis thaliana]/gi|15225777|ref|NP_180239.1|Cytochrome P450 superfamily protein [Arabidopsis thaliana]/gi|51968606|dbj|BAD42995.1|putative cytochrome P450 [Arabidopsis thaliana]/gi|2760837|gb|AAB95305.1|putative cytochro…	54.00%	AAQ65187.1;NP_180239.1;AAB95305.1;O48786.1;BAD42995.1;BAF01580.1;OAP09057.1;AEC07878.1	binding;steroid hydroxylase activity;response to light stimulus;response to brassinosteroid;brassinosteroid homeostasis;brassinosteroid metabolic process	BAS1	15.8196	147	147	15.8196	contig_10801	0	876	18.8366	143	143	18.8366	contig_10801	0	876	13.7907	123	123	13.7907	contig_10801	0	876	16.1489	231.002	1781	1781	231.002	contig_10801	0	876	312.028	2142	2142	312.028
contig_3233	645.403	439.764	588.913	27.714	588.913	27.714	200.953	7.20126e-08	3.62257e-06	heat shock factor 6	873	gi|15227413|ref|NP_181700.1|heat shock transcription factor B3 [Arabidopsis thaliana]/gi|117958747|gb|ABK59681.1|At2g41690 [Arabidopsis thaliana]/gi|75277249|sp|O22230.1|HSFB3_ARATHRecName: Full=Heat stress transcription factor B-3 Short=AtHsfB3 AltName: Full=AtHsf-05/gi|2618703|gb|AAB84350.1|putative heat shock transcription factor [Arabidopsis thaliana]/gi|330254922|gb|AEC10016.1|heat shock tra…	72.40%	AAB84350.1;ABK59681.1;AEC10016.1;O22230.1;NP_181700.1	"transcription factor activity, sequence-specific DNA binding;nucleus;cytoplasm;transcription, DNA-templated;asymmetric cell division;response to heat;response to chitin;sequence-specific DNA binding;negative regulation of transcription, DNA-templated;response to cadmium ion"	HSFB3	19.2215	98	178	19.2215	contig_3233	0	873	29.4755	123	223	29.4755	contig_3233	0	873	17.4382	77	155	17.4382	contig_3233	0	873	22.0451	159.173	688	1223	159.173	contig_3233	0	873	209.318	746	1432	209.318
contig_4420	1108.12	972.437	1039.97	28.475	1039.97	28.475	625.558	7.97583e-10	2.18174e-07	cyclic nucleotide-gated channel 12	333	gi|1039012948|gb|ANM62699.1|cyclic nucleotide-gated channel 15 [Arabidopsis thaliana]/gi|1063705113|ref|NP_001324840.1|cyclic nucleotide-gated channel 15 [Arabidopsis thaliana]	68.60%	NP_001324840.1;ANM62699.1	voltage-gated potassium channel activity;calmodulin binding;integral component of plasma membrane;defense response;response to bacterium;response to fungus;cyclic nucleotide binding;purine ribonucleotide binding;regulation of membrane potential;anion binding	CNGC15	37.9352	134	134	37.9352	contig_4420	0	333	47.473	137	137	47.473	contig_4420	0	333	41.8821	142	142	41.8821	contig_4420	0	333	42.4301	25.5902	75	75	25.5902	contig_4420	0	333	30.2733	79	79	30.2733
contig_474	1995.63	1030.66	1464.5	219.035	1464.5	219.035	23.7751	0.000244077	0.00126859	#NAME?	328	gi|332640801|gb|AEE74322.1|RmlC-like cupins superfamily protein [Arabidopsis thaliana]/gi|18203443|sp|Q9SFF9.1|GL17_ARATHRecName: Full=Germin-like protein subfamily 1 member 7 Flags: Precursor/gi|6671962|gb|AAF23221.1|AC013454_8germin-like protein [Arabidopsis thaliana]/gi|15230587|ref|NP_187246.1|RmlC-like cupins superfamily protein [Arabidopsis thaliana]/gi|6714408|gb|AAF26097.1|AC012393_23germ…	78.80%	BAF01026.1;AEE74322.1;AAF23221.1;AAF26097.1;NP_187246.1;Q9SFF9.1	manganese ion binding;nutrient reservoir activity;apoplast	AT3G05950	4.31121	15	15	4.31121	contig_474	0	328	9.85041	28	28	9.85041	contig_474	0	328	5.98881	20	20	5.98881	contig_474	0	328	6.71681	33.2548	96	96	33.2548	contig_474	0	328	1.55619	4	4	1.55619
contig_9221	835.58	192.407	738.529	157.184	738.529	157.184	36.2878	5.25421e-05	0.000394283	homeobox-leucine zipper 17	487	gi|1039012853|gb|ANM62612.1|homeobox-leucine zipper protein 17 [Arabidopsis thaliana]/gi|1063699453|ref|NP_001324758.1|homeobox-leucine zipper protein 17 [Arabidopsis thaliana]	69.10%	NP_001324758.1;ANM62612.1	"transcription factor activity, sequence-specific DNA binding;nucleus;transcription, DNA-templated;regulation of transcription, DNA-templated;sequence-specific DNA binding;transcription regulatory region DNA binding"	HB17	3.2908	17	17	3.2908	contig_9221	0	487	5.44966	23	23	5.44966	contig_9221	0	487	5.44527	27	27	5.44527	contig_9221	0	487	4.72858	557.604	2390	2390	557.604	contig_9221	0	487	556.025	2122	2122	556.025
contig_12559	529.148	512.862	521.805	78.9531	521.805	78.9531	1031.46	1.08702e-10	7.89612e-08	peroxidase	647	gi|1032276209|gb|OAO90537.1|PRX52 [Arabidopsis thaliana]	77.60%	OAO90537.1	defense response to nematode;peroxidase activity;protein binding;cell wall;vacuolar membrane;Golgi apparatus;cytosol;response to oxidative stress;lignin biosynthetic process;flower development;xylem development;heme binding;hydrogen peroxide catabolic process;metal ion binding;apoplast;oxidation-reduction process;positive regulation of syringal lignin biosynthetic process		4.37118	30	30	4.37118	contig_12559	0	647	10.7008	60	60	10.7008	contig_12559	0	647	5.00949	33	33	5.00949	contig_12559	0	647	6.69383	12.644	72	72	12.644	contig_12559	0	647	6.31136	32	32	6.31136
contig_823	815.278	348.269	575.243	9.46128	575.243	9.46128	9.91426	0.00452568	0.0128446	Heavy metal transport detoxification superfamily	352	gi|79316252|ref|NP_001030928.1|Heavy metal transport/detoxification superfamily protein [Arabidopsis thaliana]/gi|15223416|ref|NP_171656.1|Heavy metal transport/detoxification superfamily protein [Arabidopsis thaliana]/gi|20258999|gb|AAM14215.1|unknown protein [Arabidopsis thaliana]/gi|332189174|gb|AEE27295.1|Heavy metal transport/detoxification superfamily protein [Arabidopsis thaliana]/gi|19222…	81.50%	NP_001030928.1;CAA71173.1;O03982.1;NP_171656.1;AEE27296.1;AAM14215.1;AEE27295.1;AAL36161.1	nucleus;metal ion binding	AT1G01490	77.935	290	291	77.935	contig_823	0	352	59.3343	180	181	59.3343	contig_823	0	352	66.6867	238	239	66.6867	contig_823	0	352	67.9854	411.874	1276	1276	411.874	contig_823	0	352	226.577	625	625	226.577
contig_789	1854.37	1114.31	1362.61	166.183	1362.61	166.183	27.3111	0.000148503	0.000865749	#NAME?	306	gi|332007021|gb|AED94404.1|RmlC-like cupins superfamily protein [Arabidopsis thaliana]/gi|9758846|dbj|BAB09372.1|oxalate oxidase (germin protein)-like protein [Arabidopsis thaliana]/gi|15241660|ref|NP_198734.1|RmlC-like cupins superfamily protein [Arabidopsis thaliana]/gi|18202907|sp|Q9FL89.1|GL119_ARATHRecName: Full=Germin-like protein subfamily 1 member 19 Flags: Precursor	84.00%	BAB09372.1;NP_198734.1;AED94404.1;Q9FL89.1	cell wall;manganese ion binding;oxalate metabolic process;nutrient reservoir activity;oxalate decarboxylase activity;apoplast	AT5G39180	6.46964	18	21	6.46964	contig_789	0	306	12.8212	32	34	12.8212	contig_789	0	306	5.45647	17	17	5.45647	contig_789	0	306	8.24909	39.3587	90	106	39.3587	contig_789	0	306	5.00423	12	12	5.00423
contig_14043	1924.3	1059.8	-1342.38	-4.75421	-1342.38	-4.75421	34.3539	6.4314e-05	0.00045712	---NA---	433						1530.56	7030	7030	1530.56	contig_14043	0	433	2024.8	7598	7598	2024.8	contig_14043	0	433	1544.47	6809	6809	1544.47	contig_14043	0	433	1699.94	100.5	383	383	100.5	contig_14043	0	433	529.293	1796	1796	529.293
contig_5967	904.56	590.587	812.773	15.3231	812.773	15.3231	112.965	6.89639e-07	1.67993e-05	basic endochitinase	1273	gi|227774|prf||1710349Abasic chitinase	73.30%	1710349A	"chitinase activity;extracellular region;vacuolar membrane;cytosol;carbohydrate metabolic process;amino sugar metabolic process;macromolecule catabolic process;jasmonic acid and ethylene-dependent systemic resistance, ethylene mediated signaling pathway;response to cadmium ion;defense response to fungus"		48.2838	652	652	48.2838	contig_5967	0	1273	58.919	650	650	58.919	contig_5967	0	1273	63.0344	817	817	63.0344	contig_5967	0	1273	56.7457	212.425	2380	2380	212.425	contig_5967	0	1273	238.776	2382	2382	238.776
contig_11774	475.444	272.791	436.724	11.9561	436.724	11.9561	140.149	2.96894e-07	9.42588e-06	steroid sulfotransferase	689	gi|9759557|dbj|BAB11159.1|steroid sulfotransferase-like protein [Arabidopsis thaliana]	65.80%	BAB11159.1	Golgi apparatus;defense response;response to salt stress;jasmonic acid metabolic process;response to salicylic acid;response to jasmonic acid;brassinosteroid metabolic process;brassinosteroid sulfotransferase activity;hydroxyjasmonate sulfotransferase activity;flavonoid sulfotransferase activity		34.8902	255	255	34.8902	contig_11774	0	689	47.0606	280	281	47.0606	contig_11774	0	689	37.633	263	264	37.633	contig_11774	0	689	39.8613	163.917	991	994	163.917	contig_11774	0	689	190.208	1025	1027	190.208
contig_170	1410.84	1064.77	-1180.67	-4.82268	-1180.67	-4.82268	128.559	4.1624e-07	1.19983e-05	---NA---	655						1426.31	9576	9910	1426.31	contig_170	0	655	1597.67	8759	9069	1597.67	contig_170	0	655	1444.61	9247	9634	1444.61	contig_170	0	655	1489.53	444.074	2446	2560	444.074	contig_170	0	655	186.834	885	959	186.834
contig_711	518.659	436.687	464.655	835.176	464.655	835.176	107.784	8.28061e-07	1.90229e-05	Cytochrome P450	1572	"gi|116831419|gb|ABK28662.1|unknown, partial [Arabidopsis thaliana]"	63.30%	ABK28662.1	"response to UV;chloroplast;response to auxin;membrane;flavonoid 3'-monooxygenase activity;oxygen binding;indole glucosinolate metabolic process;secondary metabolite biosynthetic process;terpene biosynthetic process;cellular response to iron ion;cellular response to hypoxia;4,8,12-trimethyltrideca-1,3,7,11-tetraene synthase activity;(3E)-4,8-dimethyl-1,3,7-nonatriene synthase activity"		0.95951	16	16	0.95951	contig_711	0	1572	0.587229	8	8	0.587229	contig_711	0	1572	1.12462	18	18	1.12462	contig_711	0	1572	0.890452	0.650499	9	9	0.650499	contig_711	0	1572	0.243527	3	3	0.243527
contig_11567	1236.1	701.525	1032.19	14.7909	1032.19	14.7909	47.7641	1.88279e-05	0.000183973	Pathogenesis-related thaumatin superfamily	483	gi|21542444|sp|P50700.2|OSL3_ARATHRecName: Full=Osmotin-like protein OSM34 Flags: Precursor/gi|332657633|gb|AEE83033.1|osmotin 34 [Arabidopsis thaliana]/gi|4539456|emb|CAB39936.1|osmotin precursor [Arabidopsis thaliana]/gi|1032285602|gb|OAO99929.1|OSM34 [Arabidopsis thaliana]/gi|7267865|emb|CAB78208.1|osmotin precursor [Arabidopsis thaliana]/gi|15234263|ref|NP_192902.1|osmotin 34 [Arabidopsis tha…	71.90%	CAB78208.1;NP_192902.1;P50700.2;CAB39936.1;AEE83033.1;OAO99929.1	"cell wall;vacuole;response to virus;systemic acquired resistance;response to salt stress;defense response to bacterium, incompatible interaction;defense response to fungus, incompatible interaction;response to UV-B;anchored component of membrane;regulation of anthocyanin biosynthetic process;response to cadmium ion;apoplast"	OSM34	215.479	1103	1104	215.479	contig_11567	0	483	287.162	1200	1202	287.162	contig_11567	0	483	181.589	890	893	181.589	contig_11567	0	483	228.077	104.681	445	445	104.681	contig_11567	0	483	55.4817	210	210	55.4817
contig_3496	468.353	249.926	358.279	4.9023	358.279	4.9023	18.7327	0.000563036	0.00243301	Pseudouridine synthase archaeosine transglycosylase-like family	1062	"gi|75273402|sp|Q9LIK9.1|APS1_ARATHRecName: Full=ATP sulfurylase 1, chloroplastic Short=AtPS1 Flags: Precursor/gi|15809804|gb|AAL06830.1|AT3g22890/F5N5_6 [Arabidopsis thaliana]/gi|13877583|gb|AAK43869.1|AF370492_1ATP sulfurylase/APS kinase [Arabidopsis thaliana]/gi|17978731|gb|AAL47359.1|ATP sulfurylase/APS kinase [Arabidopsis thaliana]/gi|332643167|gb|AEE76688.1|ATP sulfurylase 1 [Arabidopsis th…	90.40%	AEE76688.1;AAK92806.1;AAK43869.1;BAB03034.1;NP_188929.1;AAL06830.1;Q9LIK9.1;AAO00898.1;BAE98690.1;AAL47359.1;AAM14146.1;OAP02702.1	sulfate assimilation;selenium compound metabolic process;adenylylsulfate kinase activity;sulfate adenylyltransferase (ATP) activity;ATP binding;mitochondrion;cytosol;plasma membrane;chloroplast stroma;response to cytokinin;cellular response to sulfate starvation;response to cadmium ion;protein trimerization;hydrogen sulfide biosynthetic process	APS1	97.0237	1093	1093	97.0237	contig_3496	0	1062	92.6819	853	853	92.6819	contig_3496	0	1062	85.7313	927	927	85.7313	contig_3496	0	1062	91.8123	224.78	2101	2101	224.78	contig_3496	0	1062	142.988	1190	1190	142.988
contig_1526	429.452	101.24	342.835	4.33731	342.835	4.33731	59.0204	8.44413e-06	0.000101452	P450 reductase 2	680	gi|14194163|gb|AAK56276.1|AF367288_1AT4g30210/F9N11_60 [Arabidopsis thaliana]/gi|16323348|gb|AAL15387.1|AT4g30210/F9N11_60 [Arabidopsis thaliana]	85.00%	AAK56276.1;AAL15387.1	NADPH-hemoprotein reductase activity;endoplasmic reticulum membrane;chloroplast;phenylpropanoid metabolic process;FMN binding;integral component of membrane;[methionine synthase] reductase activity;oxidation-reduction process		338.824	2333	2444	338.824	contig_1526	0	680	343.796	1930	2026	343.796	contig_1526	0	680	328.447	2167	2274	328.447	contig_1526	0	680	337.022	111.95	642	670	111.95	contig_1526	0	680	87.6366	442	467	87.6366
contig_21885	609.519	185.158	556.49	53.1178	556.49	53.1178	51.0246	1.46741e-05	0.000151846	Pectin lyase-like superfamily	1020	gi|1032281969|gb|OAO96297.1|hypothetical protein AXX17_AT5G62760 [Arabidopsis thaliana]	86.60%	OAO96297.1	extracellular region;pectate lyase activity;pectin catabolic process;metal ion binding		11.0908	120	120	11.0908	contig_21885	0	1020	11.3128	100	100	11.3128	contig_21885	0	1020	9.62906	99	100	9.62906	contig_21885	0	1020	10.6776	527.667	4736	4737	527.667	contig_21885	0	1020	619.148	4949	4949	619.148
contig_1391	429.381	233.703	396.484	15.6742	396.484	15.6742	93.9248	1.41374e-06	2.78454e-05	seed imbibition 2	778	gi|332646145|gb|AEE79666.1|seed imbibition 2 [Arabidopsis thaliana]/gi|42572711|ref|NP_974451.1|seed imbibition 2 [Arabidopsis thaliana]	78.90%	NP_974451.1;AEE79666.1	mRNA binding;response to oxidative stress;response to cold;plasmodesma;chloroplast;raffinose catabolic process;galactinol-sucrose galactosyltransferase activity;raffinose alpha-galactosidase activity;response to karrikin	SIP2	33.5647	277	277	33.5647	contig_1391	0	778	24.7689	167	167	24.7689	contig_1391	0	778	22.7236	180	180	22.7236	contig_1391	0	778	27.0191	183.428	1256	1256	183.428	contig_1391	0	778	154.671	943	943	154.671
contig_6054	455.226	401.72	359.276	7.12883	359.276	7.12883	18.1649	0.000626037	0.0026473	multidrug resistance-associated 3	469	gi|10172595|dbj|BAB01399.1|multidrug resistance-associated protein (MRP) ABC-transoprter [Arabidopsis thaliana]/gi|1032290741|gb|OAP05068.1|MRP3 [Arabidopsis thaliana]/gi|15230686|ref|NP_187915.1|multidrug resistance-associated protein 3 [Arabidopsis thaliana]/gi|75335110|sp|Q9LK64.1|AB3C_ARATHRecName: Full=ABC transporter C family member 3 Short=ABC transporter ABCC.3 Short=AtABCC3 AltName: Full…	92.40%	OAP05068.1;Q9LK64.1;BAB01399.1;AEE75292.1;NP_187915.1	plant-type vacuole;ATP binding;vacuolar membrane;plasma membrane;xenobiotic-transporting ATPase activity;plasmodesma;chlorophyll catabolite transmembrane transporter activity;glutathione S-conjugate-exporting ATPase activity;integral component of membrane;apoplast;response to other organism;transmembrane transport	ABCC3	54.6736	272	272	54.6736	contig_6054	0	469	55.85	227	227	55.85	contig_6054	0	469	65.338	312	312	65.338	contig_6054	0	469	58.6206	84.5492	349	349	84.5492	contig_6054	0	469	104.753	385	385	104.753
contig_826	421.717	319.312	335.323	5.28507	335.323	5.28507	29.538	0.00011179	0.000697274	trypsin inhibitor	807	gi|1032298022|gb|OAP12347.1|hypothetical protein AXX17_AT1G18760 [Arabidopsis thaliana]	45.00%	OAP12347.1	response to stress;response to chemical;response to other organism		94.2718	807	807	94.2718	contig_826	0	807	101.664	711	711	101.664	contig_826	0	807	59.5141	489	489	59.5141	contig_826	0	807	85.1499	168.952	1200	1200	168.952	contig_826	0	807	27.8302	176	176	27.8302
contig_690	463.468	358.165	403.811	186.93	403.811	186.93	138.891	3.07571e-07	9.68401e-06	S-adenosyl-L-methionine-dependent methyltransferases superfamily	448	gi|1039021212|gb|ANM70226.1|S-adenosyl-L-methionine-dependent methyltransferases superfamily protein [Arabidopsis thaliana]/gi|1063734899|ref|NP_001331855.1|S-adenosyl-L-methionine-dependent methyltransferases superfamily protein [Arabidopsis thaliana]	55.20%	NP_001331855.1;ANM70226.1		AT5G38100	2.73557	13	13	2.73557	contig_690	0	448	3.34839	8	13	3.34839	contig_690	0	448	1.9731	9	9	1.9731	contig_690	0	448	2.68568	1.01447	4	4	1.01447	contig_690	0	448	2.27871	8	8	2.27871
contig_295	385.352	93.7435	305.199	4.16358	305.199	4.16358	37.88	4.48139e-05	0.000351012	P450 reductase 2	2022	gi|1063725840|ref|NP_001328167.1|P450 reductase 2 [Arabidopsis thaliana]/gi|1039016825|gb|ANM66259.1|P450 reductase 2 [Arabidopsis thaliana]	80.20%	NP_001328167.1;ANM66259.1	NADPH-hemoprotein reductase activity;endoplasmic reticulum membrane;chloroplast;phenylpropanoid metabolic process;FMN binding;integral component of membrane;[methionine synthase] reductase activity;oxidation-reduction process	ATR2	267.29	5731	5733	267.29	contig_295	0	2022	306.51	5369	5371	306.51	contig_295	0	2022	278.863	5739	5741	278.863	contig_295	0	2022	284.221	100.191	1782	1783	100.191	contig_295	0	2022	87.407	1381	1385	87.407
contig_26040	2201.25	1647.83	2048.44	23.3007	2048.44	23.3007	219.147	5.11592e-08	2.86302e-06	Pectin lyase-like superfamily	660	gi|1032284709|gb|OAO99036.1|hypothetical protein AXX17_AT4G28670 [Arabidopsis thaliana]/gi|334186896|ref|NP_001190827.1|Pectin lyase-like superfamily protein [Arabidopsis thaliana]/gi|32129908|sp|Q9C5M8.2|PLY18_ARATHRecName: Full=Probable pectate lyase 18 AltName: Full=Pectate lyase A10 Flags: Precursor/gi|332659556|gb|AEE84956.1|Pectin lyase-like superfamily protein [Arabidopsis thaliana]/gi|572…	91.30%	AAW38990.1;AEE84955.1;OAO99036.1;NP_567707.1;Q9C5M8.2;AEE84956.1;NP_001190827.1	extracellular region;membrane;pectate lyase activity;pectin catabolic process;metal ion binding	AT4G24780	90.9866	637	637	90.9866	contig_26040	0	660	89.3403	511	511	89.3403	contig_26040	0	660	95.2402	640	640	95.2402	contig_26040	0	660	91.8557	1951.69	11337	11337	1951.69	contig_26040	0	660	2178.61	11268	11268	2178.61
contig_1338	418.804	364.91	384.12	800.472	384.12	800.472	380.991	5.72785e-09	7.02822e-07	S-adenosyl-L-methionine-dependent methyltransferases superfamily	874	gi|30580369|sp|Q9C9W3.1|CAMT1_ARATHRecName: Full=Putative caffeoyl-CoA O-methyltransferase At1g67980 AltName: Full=Trans-caffeoyl-CoA 3-O-methyltransferase Short=CCoAMT Short=CCoAOMT/gi|1032303407|gb|OAP17732.1|CCOAMT [Arabidopsis thaliana]/gi|332196610|gb|AEE34731.1|caffeoyl-CoA 3-O-methyltransferase [Arabidopsis thaliana]/gi|12324087|gb|AAG52015.1|AC012563_25putative S-adenosyl-L-methionine:tra…	71.40%	NP_564916.2;AAG52015.1;Q9C9W3.1;AEE34731.1;OAP17732.1	nucleus;cytosol;coumarin biosynthetic process;lignin biosynthetic process;methylation;caffeoyl-CoA O-methyltransferase activity;response to cadmium ion;seed development;trihydroxyferuloyl spermidine O-methyltransferase activity;caffeoyl CoA:S-adenosyl-L-methionine O-methyltransferase activity;trihydroxyferuloyl spermidine:S-adenosyl-L-methionine O-methyltransferase activity;tricaffeoyl spermidine…	CCOAMT	1.40221	13	13	1.40221	contig_1338	0	874	2.24444	17	17	2.24444	contig_1338	0	874	1.01138	9	9	1.01138	contig_1338	0	874	1.55268	0.260001	2	2	0.260001	contig_1338	0	874	0.292009	2	2	0.292009
contig_204	483.866	248.877	420.507	8.36686	420.507	8.36686	42.6279	2.88608e-05	0.000252862	blue copper binding	1481	gi|739987|prf||2004275Ablue copper-binding protein/gi|16203|emb|CAA78771.1|blue copper-binding protein [Arabidopsis thaliana]	48.40%	CAA78771.1;2004275A	binding;plasma membrane;response to stress;response to abiotic stimulus;anchored component of membrane		219.543	3449	3449	219.543	contig_204	0	1481	223.301	2866	2866	223.301	contig_204	0	1481	205.518	3099	3099	205.518	contig_204	0	1481	216.121	57.4624	749	749	57.4624	contig_204	0	1481	59.1942	687	687	59.1942
contig_2357	482.677	333.688	374.535	7.1489	374.535	7.1489	18.0016	0.000645759	0.00271646	---NA---	529						57.2047	321	321	57.2047	contig_2357	0	529	73.7278	338	338	73.7278	contig_2357	0	529	51.8004	279	279	51.8004	contig_2357	0	529	60.9109	63.1464	294	294	63.1464	contig_2357	0	529	102.279	424	424	102.279
contig_12627	401.136	349.706	369.229	63.9194	369.229	63.9194	419.097	3.92281e-09	5.56548e-07	Peroxidase superfamily	510	gi|1032276209|gb|OAO90537.1|PRX52 [Arabidopsis thaliana]	75.60%	OAO90537.1	peroxidase activity;protein binding;cell wall;Golgi apparatus;cytosol;response to oxidative stress;lignin biosynthetic process;xylem development;heme binding;hydrogen peroxide catabolic process;metal ion binding;apoplast;oxidation-reduction process;cellular response to hypoxia;positive regulation of syringal lignin biosynthetic process		3.69694	20	20	3.69694	contig_12627	0	510	10.634	47	47	10.634	contig_12627	0	510	3.27388	17	17	3.27388	contig_12627	0	510	5.86828	5.79242	26	26	5.79242	contig_12627	0	510	6.00508	24	24	6.00508
contig_32	426.069	162.107	331.153	4.61393	331.153	4.61393	15.3298	0.00111374	0.00417927	Integrase-type DNA-binding superfamily	928	gi|75262469|sp|Q9FH54.1|EF114_ARATHRecName: Full=Ethylene-responsive transcription factor ERF114 AltName: Full=ERF bud enhancer/gi|182623784|gb|ACB88827.1|At5g61890 [Arabidopsis thaliana]/gi|1032279848|gb|OAO94176.1|hypothetical protein AXX17_AT5G61390 [Arabidopsis thaliana]/gi|9758388|dbj|BAB08875.1|AP2 domain transcription factor-like [Arabidopsis thaliana]/gi|48479316|gb|AAT44929.1|putative AP…	91.60%	NP_200995.1;ACB88827.1;AED97529.1;BAB08875.1;Q9FH54.1;OAO94176.1;AAT44929.1	"transcription factor activity, sequence-specific DNA binding;protein binding;nucleolus;cytoplasm;transcription, DNA-templated;response to water deprivation;response to salt stress;cytokinin-activated signaling pathway;response to abscisic acid;response to salicylic acid;response to jasmonic acid;ethylene-activated signaling pathway;response to chitin;membrane;glucosinolate metabolic process;tran…	AT5G61890	80.1514	789	789	80.1514	contig_32	0	928	127.328	1024	1024	127.328	contig_32	0	928	67.418	637	637	67.418	contig_32	0	928	91.6323	457.91	3740	3740	457.91	contig_32	0	928	316.957	2305	2305	316.957
contig_7387	349.22	210.203	281.955	4.84863	281.955	4.84863	23.6366	0.000249202	0.00128771	ATP sulfurylase	689	gi|62319617|dbj|BAD95100.1|ATP sulfurylase like protein [Arabidopsis thaliana]	89.20%	BAD95100.1	sulfate assimilation;selenium compound metabolic process;adenylylsulfate kinase activity;sulfate adenylyltransferase (ATP) activity;ATP binding;mitochondrion;cytosol;plasma membrane;chloroplast stroma;response to cytokinin;cellular response to sulfate starvation;response to cadmium ion;protein trimerization;hydrogen sulfide biosynthetic process		83.7364	612	612	83.7364	contig_7387	0	689	76.0338	454	454	76.0338	contig_7387	0	689	60.0132	421	421	60.0132	contig_7387	0	689	73.2612	163.422	991	991	163.422	contig_7387	0	689	113.162	610	611	113.162
contig_618	528.779	141.352	418.248	5.32324	418.248	5.32324	36.1684	5.31867e-05	0.000397478	Copper transport family	643	gi|88011058|gb|ABD38896.1|At5g23760 [Arabidopsis thaliana]/gi|18420713|ref|NP_568436.1|Copper transport protein family [Arabidopsis thaliana]/gi|332005826|gb|AED93209.1|Copper transport protein family [Arabidopsis thaliana]	79.10%	NP_568436.1;AED93209.1;ABD38896.1	nucleus;metal ion binding	AT5G23760	90.1667	605	615	90.1667	contig_618	0	643	115.749	639	645	115.749	contig_618	0	643	84.3165	545	552	84.3165	contig_618	0	643	96.7442	403.768	2276	2285	403.768	contig_618	0	643	323.485	1622	1630	323.485
contig_16137	425.987	113.984	362.33	10.658	362.33	10.658	28.3271	0.000130131	0.000782901	plasma membrane fusion	1024	gi|12323422|gb|AAG51685.1|AC016972_4hypothetical protein 43000-45608 [Arabidopsis thaliana]	62.90%	AAG51685.1	extracellular region;plasma membrane;plasmodesma		41.0598	446	446	41.0598	contig_16137	0	1024	34.3693	305	305	34.3693	contig_16137	0	1024	37.1189	387	387	37.1189	contig_16137	0	1024	37.516	384.246	3463	3463	384.246	contig_16137	0	1024	330.609	2653	2653	330.609
contig_493	529.436	209.275	411.644	8.9937	411.644	8.9937	22.8666	0.000280274	0.00140835	Heavy metal transport detoxification superfamily	698	gi|79316252|ref|NP_001030928.1|Heavy metal transport/detoxification superfamily protein [Arabidopsis thaliana]/gi|15223416|ref|NP_171656.1|Heavy metal transport/detoxification superfamily protein [Arabidopsis thaliana]/gi|20258999|gb|AAM14215.1|unknown protein [Arabidopsis thaliana]/gi|332189174|gb|AEE27295.1|Heavy metal transport/detoxification superfamily protein [Arabidopsis thaliana]/gi|19222…	100.00%	NP_001030928.1;CAA71173.1;O03982.1;NP_171656.1;AEE27296.1;AAM14215.1;AEE27295.1;AAL36161.1	nucleus;metal ion binding	AT1G01490	49.567	367	367	49.567	contig_493	0	698	60.175	364	364	60.175	contig_493	0	698	44.7462	318	318	44.7462	contig_493	0	698	51.4961	281.447	1729	1729	281.447	contig_493	0	698	181.174	991	991	181.174
contig_2278	435.35	228.877	327.527	21.7216	327.527	21.7216	35.4217	5.74488e-05	0.000419152	2-oxoglutarate (2OG) and Fe(II)-dependent oxygenase superfamily	628	gi|11994563|dbj|BAB02603.1|leucoanthocyanidin dioxygenase-like protein [Arabidopsis thaliana]/gi|332641861|gb|AEE75382.1|2-oxoglutarate (2OG) and Fe(II)-dependent oxygenase superfamily protein [Arabidopsis thaliana]/gi|62320500|dbj|BAD95049.1|hypothetical protein [Arabidopsis thaliana]/gi|1032287403|gb|OAP01730.1|F6'H1 [Arabidopsis thaliana]/gi|75311178|sp|Q9LHN8.1|F6H1_ARATHRecName: Full=Feruloy…	64.10%	NP_187970.1;BAD95049.1;OAP01730.1;AEE75382.1;Q9LHN8.1;AAS49108.1;BAB02603.1	"cytoplasm;coumarin biosynthetic process;hydrogen peroxide-mediated programmed cell death;oxidoreductase activity, acting on paired donors, with incorporation or reduction of molecular oxygen, 2-oxoglutarate as one donor, and incorporation of one atom each of oxygen into both donors;metal ion binding;oxidation-reduction process;cellular response to iron ion;cellular response to ethylene stimulus;…	AT3G13610	16.9629	113	113	16.9629	contig_2278	0	628	23.8866	130	130	23.8866	contig_2278	0	628	6.56862	42	42	6.56862	contig_2278	0	628	15.806	45.2311	250	250	45.2311	contig_2278	0	628	66.2423	326	326	66.2423
contig_2623	389.664	304.89	340.364	18.1221	340.364	18.1221	124.597	4.70415e-07	1.29123e-05	NAD(P)-linked oxidoreductase superfamily	1095	gi|18377508|gb|AAL66920.1|putative aldo/keto reductase [Arabidopsis thaliana]/gi|15451098|gb|AAK96820.1|Putative Aldo/keto reductase [Arabidopsis thaliana]/gi|15218960|ref|NP_176204.1|NAD(P)-linked oxidoreductase superfamily protein [Arabidopsis thaliana]/gi|332195523|gb|AEE33644.1|NAD(P)-linked oxidoreductase superfamily protein [Arabidopsis thaliana]/gi|5080826|gb|AAD39335.1|AC007258_24Putative…	69.80%	AAD39335.1;NP_176204.1;AAK96820.1;AAL66920.1;AEE33644.1	nucleus;cytosol;alcohol dehydrogenase (NADP+) activity;response to cold;response to water deprivation;chloroplast;response to salt stress;steroid dehydrogenase activity;oxidation-reduction process;NADP+ binding	AT1G59960	22.5564	262	262	22.5564	contig_2623	0	1095	24.3427	231	231	24.3427	contig_2623	0	1095	12.7367	142	142	12.7367	contig_2623	0	1095	19.8786	71.4927	689	689	71.4927	contig_2623	0	1095	54.8889	471	471	54.8889
contig_24272	367.223	216.716	328.235	71.6895	328.235	71.6895	101.223	1.05724e-06	2.25083e-05	plant defensin	527	gi|22329675|ref|NP_173391.2|defensin-like protein [Arabidopsis thaliana]/gi|332191752|gb|AEE29873.1|defensin-like protein [Arabidopsis thaliana]/gi|17380954|gb|AAL36289.1|putative defensin AMP1 protein [Arabidopsis thaliana]/gi|21281052|gb|AAM45086.1|putative defensin AMP1 protein [Arabidopsis thaliana]/gi|57015384|sp|P82787.2|DEF19_ARATHRecName: Full=Defensin-like protein 19 AltName: Full=Defens…	59.67%	NP_173391.2;AAM45086.1;AAL36289.1;AEE29873.1;OAP17461.1;P82787.2	response to acid chemical;extracellular region;response to hormone;defense response to other organism;response to oxygen-containing compound	PDF1.4	8.58643	48	48	8.58643	contig_24272	0	527	4.59811	21	21	4.59811	contig_24272	0	527	0.745476	4	4	0.745476	contig_24272	0	527	4.64334	148.116	687	687	148.116	contig_24272	0	527	106.3	439	439	106.3
contig_1704	334.337	188.244	310.944	16.6711	310.944	16.6711	127.221	4.33613e-07	1.23714e-05	imbibition homolog	302	"gi|110740842|dbj|BAE98518.1|imbibition protein homolog, partial [Arabidopsis thaliana]"	82.00%	BAE98518.1			18.7295	60	60	18.7295	contig_1704	0	302	20.6327	54	54	20.6327	contig_1704	0	302	20.1636	62	62	20.1636	contig_1704	0	302	19.842	137.323	365	365	137.323	contig_1704	0	302	122.115	289	289	122.115
contig_489	1056.44	652.699	796.429	223.704	796.429	223.704	34.2561	6.49928e-05	0.000460503	#NAME?	377	gi|15241653|ref|NP_198731.1|RmlC-like cupins superfamily protein [Arabidopsis thaliana]/gi|18202902|sp|Q9FIC6.1|GL117_ARATHRecName: Full=Germin-like protein subfamily 1 member 17 Flags: Precursor/gi|332007016|gb|AED94399.1|RmlC-like cupins superfamily protein [Arabidopsis thaliana]/gi|10177557|dbj|BAB10836.1|germin-like protein [Arabidopsis thaliana]	81.80%	Q9FIC6.1;BAB10836.1;AED94399.1;NP_198731.1	cell wall;manganese ion binding;oxalate metabolic process;nutrient reservoir activity;oxalate decarboxylase activity;apoplast	AT5G39150	2.75064	11	11	2.75064	contig_489	0	377	4.59114	15	15	4.59114	contig_489	0	377	3.38677	13	13	3.38677	contig_489	0	377	3.57618	9.3428	28	31	9.3428	contig_489	0	377	0	0	0	0
contig_527	309.553	100.697	250.556	4.39186	250.556	4.39186	53.393	1.23579e-05	0.00013396	cellulose synthase like E1	2075	gi|1032298521|gb|OAP12846.1|CSLE1 [Arabidopsis thaliana]	62.10%	OAP12846.1	Golgi membrane;RNA polymerase II regulatory region sequence-specific DNA binding;endoplasmic reticulum membrane;plasma membrane;plant-type primary cell wall biogenesis;integral component of membrane;cellulose synthase (UDP-forming) activity;cellulose biosynthetic process;cell wall organization	CSLE1	71.3286	1569	1570	71.3286	contig_527	0	2075	78.8548	1418	1418	78.8548	contig_527	0	2075	71.4258	1508	1509	71.4258	contig_527	0	2075	73.8698	243.832	4453	4453	243.832	contig_527	0	2075	221.269	3596	3598	221.269
contig_29763	385.558	286.639	297.883	23.1454	297.883	23.1454	16.6355	0.000845436	0.00335733	basic endochitinase	645	gi|15451096|gb|AAK96819.1|basic chitinase [Arabidopsis thaliana]/gi|20148381|gb|AAM10081.1|basic chitinase [Arabidopsis thaliana]/gi|15795169|dbj|BAB03157.1|chitinase [Arabidopsis thaliana]	59.70%	AAK96819.1;AAM10081.1;BAB03157.1	"chitinase activity;cell wall;vacuolar membrane;cytosol;jasmonic acid and ethylene-dependent systemic resistance, ethylene mediated signaling pathway;response to cadmium ion;defense response to fungus;organic substance metabolic process"		10.6695	73	73	10.6695	contig_29763	0	645	13.2386	74	74	13.2386	contig_29763	0	645	16.4455	107	108	16.4455	contig_29763	0	645	13.4512	79.4463	446	451	79.4463	contig_29763	0	645	54.0108	270	273	54.0108
contig_7906	374.536	250.663	303.306	6.55352	303.306	6.55352	38.6814	4.14617e-05	0.000330529	---NA---	822						98.5152	859	859	98.5152	contig_7906	0	822	95.878	683	683	95.878	contig_7906	0	822	82.2055	688	688	82.2055	contig_7906	0	822	92.1996	67.0389	485	485	67.0389	contig_7906	0	822	46.417	299	299	46.417
contig_1034	414.233	122.403	321.07	5.78294	321.07	5.78294	22.0386	0.000319291	0.0015541	hemoglobin 1	1032	"gi|30102590|gb|AAP21213.1|At2g16060 [Arabidopsis thaliana]/gi|15226675|ref|NP_179204.1|hemoglobin 1 [Arabidopsis thaliana]/gi|4678203|gb|AAD26949.1|class 1 non-symbiotic hemoglobin (AHB1) [Arabidopsis thaliana]/gi|110743939|dbj|BAE99803.1|class 1 non-symbiotic hemoglobin [Arabidopsis thaliana]/gi|2581783|gb|AAB82769.1|class 1 non-symbiotic hemoglobin [Arabidopsis thaliana]/gi|459358426|pdb|3ZHW|…	80.50%	NP_179204.1;AAB82769.1;AEC06463.1;3ZHW_B;3ZHW_A;O24520.1;AAD26949.1;AAP21213.1;BAE99803.1;OAP07653.1	response to hypoxia;oxygen transporter activity;cell wall;cytosol;plasma membrane;fatty acid metabolic process;plasmodesma;response to cytokinin;oxygen transport;triglyceride biosynthetic process;oxygen binding;heme binding;metal ion binding	HB1	81.5744	893	893	81.5744	contig_1034	0	1032	64.5158	577	577	64.5158	contig_1034	0	1032	55.2943	581	581	55.2943	contig_1034	0	1032	67.1282	301.006	2734	2734	301.006	contig_1034	0	1032	378.62	3062	3062	378.62
contig_13009	577.2	220.966	507.53	36.6678	507.53	36.6678	23.7553	0.000244804	0.00127127	---NA---	366						12.6211	49	49	12.6211	contig_13009	0	366	14.5026	46	46	14.5026	contig_13009	0	366	15.5644	58	58	15.5644	contig_13009	0	366	14.2294	388.669	1250	1252	388.669	contig_13009	0	366	586.787	1678	1683	586.787
contig_15391	420.647	371.271	391.402	25.3352	391.402	25.3352	97.5939	1.21838e-06	2.4763e-05	MLP 423	718	gi|1032303827|gb|OAP18152.1|MLP423 [Arabidopsis thaliana]/gi|21593946|gb|AAM65899.1|pollen allergen-like protein [Arabidopsis thaliana]	53.80%	OAP18152.1;AAM65899.1	membrane		64.0733	488	488	64.0733	contig_15391	0	718	29.8923	186	186	29.8923	contig_15391	0	718	17.099	125	125	17.099	contig_15391	0	718	37.0215	12.9762	82	82	12.9762	contig_15391	0	718	14.3959	81	81	14.3959
contig_27493	377.766	119.462	290.394	1428.45	290.394	1428.45	22.1008	0.000316133	0.00154286	Auxin-responsive GH3 family	350	gi|1032294441|gb|OAP08767.1|GH3.1 [Arabidopsis thaliana]	79.70%	OAP08767.1	chloroplast;auxin-activated signaling pathway;unidimensional cell growth;camalexin biosynthetic process;auxin homeostasis;indole-3-acetic acid amido synthetase activity;positive regulation of camalexin biosynthetic process		0	0	0	0	contig_27493	0	350	0.329687	1	1	0.329687	contig_27493	0	350	0.280618	1	1	0.280618	contig_27493	0	350	0.203435	145.759	449	449	145.759	contig_27493	0	350	186.672	512	512	186.672
contig_2587	727.509	447.884	-646.65	-6.72735	-646.65	-6.72735	47.246	1.96175e-05	0.000189455	WRKY DNA-binding 60	1036	gi|222423740|dbj|BAH19836.1|AT1G80840 [Arabidopsis thaliana]	60.80%	BAH19836.1	"response to molecule of bacterial origin;transcription factor activity, sequence-specific DNA binding;protein binding;nucleus;response to wounding;response to salicylic acid;response to chitin;defense response to bacterium;transcription regulatory region DNA binding;negative regulation of transcription, DNA-templated;regulation of defense response to virus by host;defense response to fungus"		837.072	9199	9199	837.072	contig_2587	0	1036	633.868	5691	5691	633.868	contig_2587	0	1036	807.726	8520	8520	807.726	contig_2587	0	1036	759.556	109.563	999	999	109.563	contig_2587	0	1036	118	958	958	118
contig_10378	314.512	216.121	212.437	4.16514	212.437	4.16514	11.4421	0.00289298	0.00898366	beta-D-xylosidase 4	1933	gi|332008419|gb|AED95802.1|beta-xylosidase 1 [Arabidopsis thaliana]/gi|15239867|ref|NP_199747.1|beta-xylosidase 1 [Arabidopsis thaliana]/gi|75262458|sp|Q9FGY1.1|BXL1_ARATHRecName: Full=Beta-D-xylosidase 1 Short=AtBXL1 AltName: Full=Alpha-L-arabinofuranosidase Flags: Precursor/gi|9759419|dbj|BAB09906.1|xylosidase [Arabidopsis thaliana]/gi|21539545|gb|AAM53325.1|xylosidase [Arabidopsis thaliana]	75.60%	BAB09906.1;Q9FGY1.1;NP_199747.1;AAM53325.1;AED95802.1	"proteinaceous extracellular matrix;xylan 1,4-beta-xylosidase activity;plant-type cell wall;systemic acquired resistance;seed coat development;arabinan catabolic process;xylan catabolic process;alpha-L-arabinofuranosidase activity;apoplast"	BXL1	136.263	2794	2794	136.263	contig_10378	0	1933	89.065	1492	1492	89.065	contig_10378	0	1933	80.4328	1583	1583	80.4328	contig_10378	0	1933	101.92	112.68	1917	1917	112.68	contig_10378	0	1933	23.6996	359	359	23.6996
contig_2612	999.094	480.634	803.096	7.23086	803.096	7.23086	32.0896	8.26188e-05	0.000555894	---NA---	606						105.784	680	680	105.784	contig_2612	0	606	156.901	824	824	156.901	contig_2612	0	606	123.986	765	765	123.986	contig_2612	0	606	128.89	229.866	1226	1226	229.866	contig_2612	0	606	264.27	1255	1255	264.27
contig_21	1476.29	1216.96	-1333.63	-16.9645	-1333.63	-16.9645	66.1577	5.45967e-06	7.3968e-05	"xyloglucan endo-1,4-beta-D-glucanase precursor"	301	"gi|24417480|gb|AAN60350.1|unknown, partial [Arabidopsis thaliana]"	80.90%	AAN60350.1	"hydrolase activity, hydrolyzing O-glycosyl compounds;Golgi apparatus;plasma membrane;aging;response to heat;response to cold;plant-type cell wall;chloroplast;response to mechanical stimulus;response to auxin;gibberellic acid mediated signaling pathway;response to brassinosteroid;plant-type cell wall loosening;xyloglucan metabolic process;xyloglucan:xyloglucosyl transferase activity;cell wall bio…		1401.55	4475	4475	1401.55	contig_21	0	301	1317.98	3438	3438	1317.98	contig_21	0	301	1531.98	4695	4695	1531.98	contig_21	0	301	1417.17	100.786	267	267	100.786	contig_21	0	301	130.999	309	309	130.999
contig_3958	338.207	187.704	-247.929	-5.27989	-247.929	-5.27989	16.8832	0.000804044	0.00323255	---NA---	594						369.787	2330	2330	369.787	contig_3958	0	594	255.452	1315	1315	255.452	contig_3958	0	594	292.335	1768	1768	292.335	contig_3958	0	594	305.858	104.63	547	547	104.63	contig_3958	0	594	31.5797	147	147	31.5797
contig_3234	285.951	213.594	258.749	20.9476	258.749	20.9476	94.0851	1.40442e-06	2.76769e-05	heat shock factor 6	387	gi|1032295212|gb|OAP09538.1|HSFB3 [Arabidopsis thaliana]	61.80%	OAP09538.1	"DNA binding;transcription factor activity, sequence-specific DNA binding;nucleus;regulation of transcription, DNA-templated;asymmetric cell division;response to cadmium ion"		9.74386	24	40	9.74386	contig_3234	0	387	22.0643	37	74	22.0643	contig_3234	0	387	7.1061	14	28	7.1061	contig_3234	0	387	12.9714	63.7097	108	217	63.7097	contig_3234	0	387	98.9208	133	300	98.9208
contig_7379	303.452	126.152	258.337	20.9027	258.337	20.9027	53.3697	1.23784e-05	0.000134004	Auxin-responsive GH3 family	2344	gi|1032294441|gb|OAP08767.1|GH3.1 [Arabidopsis thaliana]	84.10%	OAP08767.1	chloroplast;auxin-activated signaling pathway;unidimensional cell growth;auxin homeostasis;indole-3-acetic acid amido synthetase activity		9.77306	243	243	9.77306	contig_7379	0	2344	13.5377	274	275	13.5377	contig_7379	0	2344	15.6292	373	373	15.6292	contig_7379	0	2344	12.98	159.185	3283	3284	159.185	contig_7379	0	2344	189.016	3472	3472	189.016
contig_116	294.595	286.068	281.264	120.957	281.264	120.957	190.182	8.94739e-08	4.14502e-06	Peroxidase superfamily	1445	gi|15239075|ref|NP_196153.1|Peroxidase superfamily protein [Arabidopsis thaliana]/gi|10176746|dbj|BAB09977.1|peroxidase [Arabidopsis thaliana]/gi|26397801|sp|Q9FLC0.1|PER52_ARATHRecName: Full=Peroxidase 52 Short=Atperox P52 AltName: Full=ATP49 Flags: Precursor/gi|17529072|gb|AAL38746.1|putative peroxidase [Arabidopsis thaliana]/gi|332003478|gb|AED90861.1|Peroxidase superfamily protein [Arabidopsi…	75.50%	AAL38746.1;BAB09977.1;NP_196153.1;Q9FLC0.1;AED90861.1	peroxidase activity;protein binding;cell wall;Golgi apparatus;cytosol;response to oxidative stress;lignin biosynthetic process;xylem development;heme binding;hydrogen peroxide catabolic process;metal ion binding;apoplast;oxidation-reduction process;cellular response to hypoxia;positive regulation of syringal lignin biosynthetic process	PRX52	3.262	50	50	3.262	contig_116	0	1445	1.5971	20	20	1.5971	contig_116	0	1445	2.17504	32	32	2.17504	contig_116	0	1445	2.34471	5.66137	72	72	5.66137	contig_116	0	1445	11.4803	130	130	11.4803
contig_5624	350.889	267.786	-291.071	-6.33385	-291.071	-6.33385	31.2059	9.15053e-05	0.000599364	---NA---	324						321.805	1098	1106	321.805	contig_5624	0	324	350.445	977	984	350.445	contig_5624	0	324	364.674	1199	1203	364.674	contig_5624	0	324	345.641	112.568	320	321	112.568	contig_5624	0	324	13.7848	35	35	13.7848
contig_11050	1445.06	1242.98	1409.88	22.2165	1409.88	22.2165	415.839	4.04634e-09	5.67425e-07	Pectin lyase-like superfamily	982	gi|18424677|ref|NP_568967.1|Pectin lyase-like superfamily protein [Arabidopsis thaliana]/gi|32129906|sp|Q93Z25.1|PLY22_ARATHRecName: Full=Probable pectate lyase 22 Flags: Precursor/gi|16648840|gb|AAL25610.1|AT5g63180/MDC12_15 [Arabidopsis thaliana]/gi|332010332|gb|AED97715.1|Pectin lyase-like superfamily protein [Arabidopsis thaliana]	89.70%	Q93Z25.1;NP_568967.1;AED97715.1;AAL25610.1	extracellular region;membrane;pectate lyase activity;pectin catabolic process;metal ion binding	AT5G63180	67.1039	699	699	67.1039	contig_11050	0	982	59.3404	505	505	59.3404	contig_11050	0	982	72.9122	729	729	72.9122	contig_11050	0	982	66.4522	1456.24	12586	12586	1456.24	contig_11050	0	982	1504.4	11577	11577	1504.4
contig_11396	296.331	216.308	257.031	211.13	257.031	211.13	112.602	6.98346e-07	1.69093e-05	glutathione S-transferase	634	gi|332641224|gb|AEE74745.1|glutathione S-transferase TAU 8 [Arabidopsis thaliana]/gi|21554248|gb|AAM63323.1|putative glutathione transferase [Arabidopsis thaliana]/gi|89111910|gb|ABD60727.1|At3g09270 [Arabidopsis thaliana]/gi|15232628|ref|NP_187538.1|glutathione S-transferase TAU 8 [Arabidopsis thaliana]/gi|75337546|sp|Q9SR36.1|GSTU8_ARATHRecName: Full=Glutathione S-transferase U8 Short=AtGSTU8 A…	72.30%	NP_187538.1;AAM63323.1;ABD60727.1;AAF14025.1;Q9SR36.1;AEE74745.1	glutathione transferase activity;cytosol;plasma membrane;glutathione metabolic process;response to oxidative stress;toxin catabolic process;plasmodesma;response to salicylic acid;glutathione binding;response to cadmium ion	GSTU8	1.33824	9	9	1.33824	contig_11396	0	634	1.09202	6	6	1.09202	contig_11396	0	634	1.23932	8	8	1.23932	contig_11396	0	634	1.2232	10.3943	58	58	10.3943	contig_11396	0	634	11.2714	56	56	11.2714
contig_7	248.957	81.1459	195.117	4.27428	195.117	4.27428	42.0057	3.04922e-05	0.000262996	Cysteine ases superfamily	973	gi|42573257|ref|NP_974725.1|Cysteine proteinases superfamily protein [Arabidopsis thaliana]/gi|332003203|gb|AED90586.1|Cysteine proteinases superfamily protein [Arabidopsis thaliana]/gi|7378613|emb|CAB83289.1|putative protein [Arabidopsis thaliana]/gi|332003202|gb|AED90585.1|Cysteine proteinases superfamily protein [Arabidopsis thaliana]/gi|15242721|ref|NP_195953.1|Cysteine proteinases superfamil…	70.20%	CAB83289.1;AED90585.1;ABN04756.1;AED90586.1;AFS88958.1;NP_195953.1;NP_974725.1	nucleus;plasma membrane;proteolysis;cysteine-type peptidase activity;chloroplast	AT5G03330	58.3265	602	602	58.3265	contig_7	0	973	65.9375	556	556	65.9375	contig_7	0	973	54.5086	540	540	54.5086	contig_7	0	973	59.5908	168.387	1442	1442	168.387	contig_7	0	973	169.838	1295	1295	169.838
contig_1084	245.166	220.848	234.964	13.9063	234.964	13.9063	310.363	1.29166e-08	1.21852e-06	2-oxoglutarate (2OG) and Fe(II)-dependent oxygenase superfamily	745	gi|332189895|gb|AEE28016.1|2-oxoglutarate (2OG) and Fe(II)-dependent oxygenase superfamily protein [Arabidopsis thaliana]/gi|238478377|ref|NP_001154314.1|2-oxoglutarate (2OG) and Fe(II)-dependent oxygenase superfamily protein [Arabidopsis thaliana]	69.70%	NP_001154314.1;AEE28016.1	"cytosol;1-aminocyclopropane-1-carboxylate oxidase activity;oxidoreductase activity, acting on paired donors, with incorporation or reduction of molecular oxygen, 2-oxoglutarate as one donor, and incorporation of one atom each of oxygen into both donors;oxidation-reduction process"	AT1G06640	18.3482	145	145	18.3482	contig_1084	0	745	24.0074	155	155	24.0074	contig_1084	0	745	12.2606	93	93	12.2606	contig_1084	0	745	18.2054	30.6547	201	201	30.6547	contig_1084	0	745	44.363	259	259	44.363
contig_526	355.434	235.092	277.697	343.141	277.697	343.141	21.2413	0.000363486	0.00172078	B12D	388	gi|1032290882|gb|OAP05209.1|hypothetical protein AXX17_AT3G33020 [Arabidopsis thaliana]	73.17%	OAP05209.1	mitochondrion;peroxisome;leaf senescence;integral component of membrane		0.485937	2	2	0.485937	contig_526	0	388	1.18959	4	4	1.18959	contig_526	0	388	0.759406	3	3	0.759406	contig_526	0	388	0.811645	28.4051	97	97	28.4051	contig_526	0	388	44.7285	136	136	44.7285
contig_11902	333.469	244.787	266.026	28.4197	266.026	28.4197	57.0842	9.58739e-06	0.000111536	transmembrane protein	750	gi|15229864|ref|NP_187787.1|transmembrane protein [Arabidopsis thaliana]/gi|6671937|gb|AAF23197.1|AC016795_10unknown protein [Arabidopsis thaliana]/gi|332641580|gb|AEE75101.1|transmembrane protein [Arabidopsis thaliana]	53.25%	NP_187787.1;AAF23197.1;AEE75101.1		AT3G11810	9.17579	73	73	9.17579	contig_11902	0	750	9.84666	64	64	9.84666	contig_11902	0	750	10.0836	77	77	10.0836	contig_11902	0	750	9.702	23.1786	153	153	23.1786	contig_11902	0	750	15.4831	91	91	15.4831
contig_4703	260.754	199.126	238.118	33.9589	238.118	33.9589	118.709	5.68332e-07	1.46085e-05	S-adenosyl-L-methionine-dependent methyltransferases superfamily	468	gi|1039021212|gb|ANM70226.1|S-adenosyl-L-methionine-dependent methyltransferases superfamily protein [Arabidopsis thaliana]/gi|1063734899|ref|NP_001331855.1|S-adenosyl-L-methionine-dependent methyltransferases superfamily protein [Arabidopsis thaliana]	57.30%	NP_001331855.1;ANM70226.1		AT5G38100	7.65455	30	38	7.65455	contig_4703	0	468	14.054	53	57	14.054	contig_4703	0	468	3.98742	17	19	3.98742	contig_4703	0	468	8.56532	8.0117	33	33	8.0117	contig_4703	0	468	6.54399	22	24	6.54399
contig_1892	365.557	190.9	269.129	8.11041	269.129	8.11041	26.6137	0.000163016	0.000930935	3-hydroxy-3-methylglutaryl reductase	404	gi|227206316|dbj|BAH57213.1|AT1G76490 [Arabidopsis thaliana]	95.25%	BAH57213.1	"hydroxymethylglutaryl-CoA reductase (NADPH) activity;protein binding;nucleus;peroxisomal membrane;endoplasmic reticulum membrane;plastid;coenzyme A metabolic process;integral component of membrane;triterpenoid biosynthetic process;sterol biosynthetic process;isopentenyl diphosphate biosynthetic process, mevalonate pathway;hydroxymethylglutaryl-CoA reductase activity;NADP binding;oxidation-reduct…		74.9041	320	321	74.9041	contig_1892	0	404	96.8252	339	339	96.8252	contig_1892	0	404	68.557	282	282	68.557	contig_1892	0	404	80.0955	28.9676	103	103	28.9676	contig_1892	0	404	29.0592	92	92	29.0592
contig_430	300.477	45.5023	189.261	4.46012	189.261	4.46012	9.78889	0.0047058	0.0132646	---NA---	645						207.106	1377	1417	207.106	contig_430	0	645	209.85	1138	1173	209.85	contig_430	0	645	176.942	1117	1162	176.942	contig_430	0	645	197.966	41.5728	227	236	41.5728	contig_430	0	645	47.2842	232	239	47.2842
contig_5087	268.469	171.211	224.767	5.29734	224.767	5.29734	26.2061	0.000172321	0.000970489	Rubber elongation factor (REF)	414	"gi|30697500|ref|NP_849856.1|Rubber elongation factor protein (REF) [Arabidopsis thaliana]/gi|14424100|sp|Q9FYF7.1|Y1736_ARATHRecName: Full=REF/SRPP-like protein At1g67360/gi|23198404|gb|AAN15729.1|stress related protein, putative [Arabidopsis thaliana]/gi|332196515|gb|AEE34636.1|Rubber elongation factor protein (REF) [Arabidopsis thaliana]/gi|15220426|ref|NP_176904.1|Rubber elongation factor pro…	62.50%	NP_849856.1;Q9FYF7.1;AAG00248.1;AAM14352.1;AAM62466.1;AEE34637.1;AEE34636.1;AAM96963.1;NP_176904.1;AAN15729.1;AAK93588.1	vacuole;endoplasmic reticulum;lipid particle;pollen development;lipid storage;lipid particle organization;positive regulation of growth;developmental vegetative growth;positive regulation of response to water deprivation	AT1G67360	55.7889	229	245	55.7889	contig_5087	0	414	48.2188	167	173	48.2188	contig_5087	0	414	52.904	213	223	52.904	contig_5087	0	414	52.3039	112.248	384	409	112.248	contig_5087	0	414	120.827	375	392	120.827
contig_7503	400.005	176.287	309.02	5.33269	309.02	5.33269	18.5598	0.000581349	0.00249387	Brassinosteroid signaling positive regulator (BZR1) family	517	gi|3834322|gb|AAC83038.1|EST gb|R30300 comes from this gene [Arabidopsis thaliana]/gi|19699252|gb|AAL90992.1|At1g78700/F9K20_26 [Arabidopsis thaliana]/gi|332198019|gb|AEE36140.1|BES1/BZR1 homolog 4 [Arabidopsis thaliana]/gi|61211694|sp|Q9ZV88.1|BEH4_ARATHRecName: Full=BES1/BZR1 homolog protein 4/gi|18412073|ref|NP_565187.1|BES1/BZR1 homolog 4 [Arabidopsis thaliana]/gi|1032304833|gb|OAP19158.1|BEH…	80.10%	AAK91446.1;OAP19158.1;AAL90992.1;Q9ZV88.1;AEE36140.1;NP_565187.1;AAC83038.1	"core promoter sequence-specific DNA binding;transcription factor activity, sequence-specific DNA binding;protein binding;nucleus;vacuole;cytosol;transcription, DNA-templated;brassinosteroid mediated signaling pathway;defense response to bacterium;negative regulation of transcription, DNA-templated;seed development;plant ovule development;quiescent center organization"	BEH4	55.7973	306	306	55.7973	contig_7503	0	517	88.8306	398	398	88.8306	contig_7503	0	517	69.3404	365	365	69.3404	contig_7503	0	517	71.3228	386.573	1759	1759	386.573	contig_7503	0	517	315.934	1279	1280	315.934
contig_4638	630.277	497.543	-542.793	-7.49529	-542.793	-7.49529	18.0005	0.000645894	0.00271672	---NA---	654						615.65	4262	4271	615.65	contig_4638	0	654	675.935	3821	3831	675.935	contig_4638	0	654	587.497	3905	3912	587.497	contig_4638	0	654	626.36	340.34	1947	1959	340.34	contig_4638	0	654	45.6579	233	234	45.6579
contig_12113	813.281	729.589	-743.03	-4.53817	-743.03	-4.53817	77.5623	2.96345e-06	4.74152e-05	Peroxidase superfamily	429	gi|21593054|gb|AAM65003.1|putative peroxidase ATP2a [Arabidopsis thaliana]	78.80%	AAM65003.1	peroxidase activity;extracellular region;cytosol;response to oxidative stress;plant-type cell wall;plant-type cell wall organization;heme binding;hydrogen peroxide catabolic process;metal ion binding;rhythmic process;defense response to fungus;oxidation-reduction process		979.856	4459	4459	979.856	contig_12113	0	429	931.194	3462	3462	931.194	contig_12113	0	429	948.052	4141	4141	948.052	contig_12113	0	429	953.034	418.462	1580	1580	418.462	contig_12113	0	429	166.574	560	560	166.574
contig_3358	562.17	243.854	504.89	9.39503	504.89	9.39503	72.4026	3.86246e-06	5.75173e-05	cysteine synthase C1	1087	gi|332646683|gb|AEE80204.1|cysteine synthase C1 [Arabidopsis thaliana]/gi|145332917|ref|NP_001078324.1|cysteine synthase C1 [Arabidopsis thaliana]	86.60%	NP_001078324.1;AEE80204.1	cysteine synthase activity;copper ion binding;protein binding;ATP binding;mitochondrion;endosome;trans-Golgi network;cysteine biosynthetic process from serine;immune response;zinc ion binding;chromoplast;double fertilization forming a zygote and endosperm;chloroplast stroma;response to cytokinin;pollen tube growth;chloroplast envelope;transferase activity;cyanide catabolic process;pyridoxal phosp…	CYSC1	56.1121	647	647	56.1121	contig_3358	0	1087	62.4192	588	588	62.4192	contig_3358	0	1087	61.8935	685	685	61.8935	contig_3358	0	1087	60.1416	265.602	2541	2541	265.602	contig_3358	0	1087	269.89	2299	2299	269.89
contig_4204	374.939	244.592	-334.348	-4.85832	-334.348	-4.85832	27.924	0.000137059	0.000814593	---NA---	353						435.306	1629	1630	435.306	contig_4204	0	353	386.705	1183	1183	386.705	contig_4204	0	353	441	1582	1585	441	contig_4204	0	353	421.004	110.402	343	343	110.402	contig_4204	0	353	83.5054	231	231	83.5054
contig_9546	225.807	185.28	203.326	9.71673	203.326	9.71673	147.255	2.44573e-07	8.14196e-06	MYB transcription factor	456	gi|126352298|gb|ABO09894.1|At5g57620 [Arabidopsis thaliana]/gi|110737544|dbj|BAF00714.1|Myb-related transcription factor-like protein [Arabidopsis thaliana]/gi|15242793|ref|NP_200570.1|myb domain protein 36 [Arabidopsis thaliana]/gi|9758323|dbj|BAB08797.1|Myb-related transcription factor-like protein [Arabidopsis thaliana]/gi|332009543|gb|AED96926.1|myb domain protein 36 [Arabidopsis thaliana]/gi…	87.20%	BAB08797.1;BAF00714.1;NP_200570.1;AED96926.1;ABO09894.1;AAS10110.1;Q9FKL2.1	"RNA polymerase II transcription factor activity, sequence-specific DNA binding;transcription factor activity, RNA polymerase II transcription factor recruiting;protein binding;nucleus;transcription, DNA-templated;regulation of transcription from RNA polymerase II promoter;negative regulation of cell proliferation;response to abscisic acid;response to gibberellin;response to salicylic acid;respon…	MYB36	28.1162	136	136	28.1162	contig_9546	0	456	28.8476	113	114	28.8476	contig_9546	0	456	28.2157	130	131	28.2157	contig_9546	0	456	28.3932	22.6743	91	91	22.6743	contig_9546	0	456	17.3502	62	62	17.3502
contig_21122	292.921	196.116	211.841	15.583	211.841	15.583	14.8982	0.00122528	0.00451226	basic endochitinase	713	gi|15451096|gb|AAK96819.1|basic chitinase [Arabidopsis thaliana]/gi|20148381|gb|AAM10081.1|basic chitinase [Arabidopsis thaliana]/gi|15795169|dbj|BAB03157.1|chitinase [Arabidopsis thaliana]	57.70%	AAK96819.1;AAM10081.1;BAB03157.1	"chitinase activity;cell wall;vacuolar membrane;cytosol;catabolic process;jasmonic acid and ethylene-dependent systemic resistance, ethylene mediated signaling pathway;macromolecule metabolic process;response to cadmium ion;defense response to fungus"		16.5273	121	125	16.5273	contig_21122	0	713	14.2418	88	88	14.2418	contig_21122	0	713	12.8108	92	93	12.8108	contig_21122	0	713	14.5266	49.8783	309	313	49.8783	contig_21122	0	713	36.6895	201	205	36.6895
contig_4807	431.231	314.212	-390.866	-6.23909	-390.866	-6.23909	24.7615	0.000211149	0.00113345	CP12 precursor	627	"gi|330255742|gb|AEC10836.1|CP12 domain-containing protein 1 [Arabidopsis thaliana]/gi|1032294382|gb|OAP08708.1|CP12-1 [Arabidopsis thaliana]/gi|21387021|gb|AAM47914.1|putative chloroplast protein CP12 [Arabidopsis thaliana]/gi|30690673|ref|NP_566100.2|CP12 domain-containing protein 1 [Arabidopsis thaliana]/gi|75097637|sp|O22914.1|CP121_ARATHRecName: Full=Calvin cycle protein CP12-1, chloroplasti…	76.56%	NP_566100.2;O22914.1;OAP08708.1;AEC10836.1;AAL32917.1;AAM47914.1	protein binding;response to light stimulus;chloroplast stroma;response to sucrose;chloroplast envelope;peptide cross-linking via L-cystine;reductive pentose-phosphate cycle;cellular response to heat;protein complex;cellular response to cold;cellular response to anoxia;negative regulation of reductive pentose-phosphate cycle	CP12-1	477.524	3176	3176	477.524	contig_4807	0	627	428.436	2327	2328	428.436	contig_4807	0	627	490.456	3129	3131	490.456	contig_4807	0	627	465.472	88.6131	489	489	88.6131	contig_4807	0	627	59.2247	291	291	59.2247
contig_883	268.466	112.898	-225.823	-4.27302	-225.823	-4.27302	30.5215	9.92216e-05	0.000637941	2-oxoglutarate (2OG) and Fe(II)-dependent oxygenase superfamily	409	gi|42572483|ref|NP_974337.1|2-oxoglutarate (2OG) and Fe(II)-dependent oxygenase superfamily protein [Arabidopsis thaliana]/gi|332642659|gb|AEE76180.1|2-oxoglutarate (2OG) and Fe(II)-dependent oxygenase superfamily protein [Arabidopsis thaliana]	63.80%	AEE76180.1;NP_974337.1	"metabolic process;oxidoreductase activity, acting on paired donors, with incorporation or reduction of molecular oxygen, 2-oxoglutarate as one donor, and incorporation of one atom each of oxygen into both donors"	AT3G19000	271.982	1164	1180	271.982	contig_883	0	409	333.194	1156	1181	333.194	contig_883	0	409	279.281	1136	1163	279.281	contig_883	0	409	294.819	64.7276	226	233	64.7276	contig_883	0	409	68.9519	218	221	68.9519
contig_1085	227.367	168.055	182.635	4.48807	182.635	4.48807	40.6473	3.44738e-05	0.00028777	cinnamyl-alcohol dehydrogenase ELI3-1	681	gi|1032284932|gb|OAO99259.1|CAD6 [Arabidopsis thaliana]	87.00%	OAO99259.1	cytoplasm;zinc ion binding;response to bacterium;response to cytokinin;lignin biosynthetic process;cinnamyl-alcohol dehydrogenase activity;mannitol dehydrogenase activity;aryl-alcohol dehydrogenase (NADP+) activity;apoplast;sinapyl alcohol dehydrogenase activity;oxidation-reduction process		58.4181	422	422	58.4181	contig_1085	0	681	46.5968	275	275	46.5968	contig_1085	0	681	52.0648	361	361	52.0648	contig_1085	0	681	52.3599	49.7194	298	298	49.7194	contig_1085	0	681	91.2556	487	487	91.2556
contig_22218	2113.23	1527.08	1792.67	17.9548	1792.67	17.9548	100.055	1.10603e-06	2.32069e-05	alpha beta-Hydrolases superfamily	512	gi|1032293141|gb|OAP07467.1|hypothetical protein AXX17_AT2G39820 [Arabidopsis thaliana]	71.00%	OAP07467.1	triglyceride lipase activity;plasma membrane;lipid metabolic process		108.265	588	588	108.265	contig_22218	0	512	118.771	524	527	118.771	contig_22218	0	512	90.1596	469	470	90.1596	contig_22218	0	512	105.732	2203.39	9898	9929	2203.39	contig_22218	0	512	1797.48	7180	7212	1797.48
contig_12429	231.382	98.1641	219.157	61.4285	219.157	61.4285	313.989	1.23356e-08	1.19474e-06	Integrase-type DNA-binding superfamily	507	"gi|225898897|dbj|BAH30579.1|hypothetical protein, partial [Arabidopsis thaliana]/gi|75264365|sp|Q9LY29.1|EF115_ARATHRecName: Full=Ethylene-responsive transcription factor ERF115/gi|7576169|emb|CAB87920.1|putative transcription factor [Arabidopsis thaliana]/gi|106879181|gb|ABF82620.1|At5g07310 [Arabidopsis thaliana]/gi|332003752|gb|AED91135.1|Integrase-type DNA-binding superfamily protein [Arabid…	75.30%	AAT44952.1;ABF82620.1;NP_196348.1;BAH30579.1;AED91135.1;Q9LY29.1;CAB87920.1	"response to acid chemical;protein binding;regulation of transcription, DNA-templated;nitrogen compound metabolic process;response to abiotic stimulus;response to ethylene;sequence-specific DNA binding;cellular metabolic process;single-organism process;defense response to fungus;cellular response to stimulus;organic substance metabolic process;response to oxygen-containing compound"	AT5G07310	3.16099	17	17	3.16099	contig_12429	0	507	5.00708	22	22	5.00708	contig_12429	0	507	2.71209	14	14	2.71209	contig_12429	0	507	3.62672	143.202	639	639	143.202	contig_12429	0	507	130.377	518	518	130.377
contig_3311	275.915	224.459	243.963	11.2158	243.963	11.2158	112.552	6.99553e-07	1.69272e-05	MLP 423	493	gi|1032303827|gb|OAP18152.1|MLP423 [Arabidopsis thaliana]/gi|21593946|gb|AAM65899.1|pollen allergen-like protein [Arabidopsis thaliana]	51.33%	OAP18152.1;AAM65899.1			34.9934	183	183	34.9934	contig_3311	0	493	22.7036	97	97	22.7036	contig_3311	0	493	13.9455	70	70	13.9455	contig_3311	0	493	23.8809	26.5038	115	115	26.5038	contig_3311	0	493	38.8259	150	150	38.8259
contig_5012	255.953	129.247	182.107	6.26186	182.107	6.26186	16.0626	0.000951907	0.00369609	---NA---	374						111.16	440	441	111.16	contig_5012	0	374	138.222	443	448	138.222	contig_5012	0	374	115.549	437	440	115.549	contig_5012	0	374	121.644	56.2027	185	185	56.2027	contig_5012	0	374	21.4954	63	63	21.4954
contig_4128	262.014	95.2794	197.095	9.70822	197.095	9.70822	19.101	0.000526382	0.00230784	Glucose-methanol-choline (GMC) oxidoreductase family	452	gi|91806075|gb|ABE65766.1|mandelonitrile lyase [Arabidopsis thaliana]	78.70%	ABE65766.1	"extracellular region;defense response;cell-cell signaling;embryo sac development;fatty acid omega-oxidation;oxidoreductase activity, acting on CH-OH group of donors;cyanide biosynthetic process;mandelonitrile lyase activity;flavin adenine dinucleotide binding"		25.2365	121	121	25.2365	contig_4128	0	452	20.9337	82	82	20.9337	contig_4128	0	452	21.7293	100	100	21.7293	contig_4128	0	452	22.6332	112.364	447	447	112.364	contig_4128	0	452	163.745	580	580	163.745
contig_1205	561.324	441.726	-511.946	-10.2011	-511.946	-10.2011	147.637	2.42098e-07	8.10074e-06	Late embryogenesis abundant	568	"gi|56554616|pdb|1XO8|AChain A, Solution Structure Of At1g01470 From Arabidopsis Thaliana/gi|50253562|gb|AAT71983.1|At1g01470 [Arabidopsis thaliana]/gi|332189170|gb|AEE27291.1|Late embryogenesis abundant protein [Arabidopsis thaliana]/gi|1922244|emb|CAA71174.1|putative desication related protein LEA14 [Arabidopsis thaliana]/gi|18650614|gb|AAL75906.1|At1g01470/F22L4_2 [Arabidopsis thaliana]/gi|152…	65.00%	CAA71174.1;AEE27291.1;AAT71983.1;1XO8_A;AAL75906.1;O03983.1;AAF81307.1;OAP12008.1;NP_171654.1;CAA73311.1	cytosol;plasma membrane;response to desiccation;response to wounding;response to high light intensity;embryo development ending in seed dormancy;intracellular membrane-bounded organelle;apoplast;defense response to fungus	LEA14	525.798	3168	3168	525.798	contig_1205	0	568	571.061	2811	2811	571.061	contig_1205	0	568	605.899	3504	3504	605.899	contig_1205	0	568	567.586	46.4084	232	232	46.4084	contig_1205	0	568	75.9357	338	338	75.9357
contig_8871	311.259	123.397	252.872	62.7137	252.872	62.7137	36.3551	5.21833e-05	0.000392158	cytochrome family subfamily polypeptide 1	537	gi|1032280968|gb|OAO95296.1|CYP724A1 [Arabidopsis thaliana]	64.40%	OAO95296.1	endoplasmic reticulum;response to brassinosteroid;unidimensional cell growth;jasmonic acid mediated signaling pathway;steroid 22-alpha hydroxylase activity;brassinosteroid homeostasis;leaf shaping;sterol metabolic process;brassinosteroid biosynthetic process;oxygen binding		3.3355	19	19	3.3355	contig_8871	0	537	3.65296	17	17	3.65296	contig_8871	0	537	5.30405	29	29	5.30405	contig_8871	0	537	4.09751	150.859	713	713	150.859	contig_8871	0	537	163.015	686	686	163.015
contig_11175	220.742	130.864	207.029	46.3871	207.029	46.3871	149.589	2.29939e-07	7.79048e-06	cytochrome P450	1064	gi|9294385|dbj|BAB02395.1|cytochrome P450-like protein [Arabidopsis thaliana]	70.60%	BAB02395.1	monooxygenase activity;endoplasmic reticulum;circadian rhythm;oxygen binding		5.40468	61	61	5.40468	contig_11175	0	1064	4.77179	44	44	4.77179	contig_11175	0	1064	3.50773	38	38	3.50773	contig_11175	0	1064	4.5614	83.1864	779	779	83.1864	contig_11175	0	1064	120.532	1005	1005	120.532
contig_1059	264.739	148.378	189.284	12.3438	189.284	12.3438	20.9502	0.00038151	0.00178931	cinnamyl alcohol dehydrogenase 6	396	gi|15227106|ref|NP_179780.1|cinnamyl alcohol dehydrogenase homolog 3 [Arabidopsis thaliana]/gi|75337294|sp|Q9SJ10.1|CADH3_ARATHRecName: Full=Cinnamyl alcohol dehydrogenase 3 Short=AtCAD3/gi|4417281|gb|AAD20406.1|putative cinnamyl-alcohol dehydrogenase [Arabidopsis thaliana]/gi|31880035|gb|AAP59431.1|cinnamyl alcohol dehydrogenase-like protein [Arabidopsis thaliana]/gi|330252141|gb|AEC07235.1|cinn…	75.80%	NP_179780.1;AAD20406.1;AEC07235.1;AAP59431.1;Q9SJ10.1	cytoplasm;response to cytokinin;lignin biosynthetic process;cinnamyl-alcohol dehydrogenase activity;apoplast	CAD3	19.0448	80	80	19.0448	contig_1059	0	396	13.404	46	46	13.404	contig_1059	0	396	17.6095	71	71	17.6095	contig_1059	0	396	16.6861	50.7849	177	177	50.7849	contig_1059	0	396	98.2839	305	305	98.2839
contig_16577	726.593	375.028	536.12	18.4363	536.12	18.4363	26.4448	0.000166794	0.000946258	Pathogenesis-related thaumatin superfamily	392	gi|21542444|sp|P50700.2|OSL3_ARATHRecName: Full=Osmotin-like protein OSM34 Flags: Precursor/gi|332657633|gb|AEE83033.1|osmotin 34 [Arabidopsis thaliana]/gi|4539456|emb|CAB39936.1|osmotin precursor [Arabidopsis thaliana]/gi|1032285602|gb|OAO99929.1|OSM34 [Arabidopsis thaliana]/gi|7267865|emb|CAB78208.1|osmotin precursor [Arabidopsis thaliana]/gi|15234263|ref|NP_192902.1|osmotin 34 [Arabidopsis tha…	65.50%	CAB78208.1;NP_192902.1;P50700.2;CAB39936.1;AEE83033.1;OAO99929.1	"extracellular region;response to salt stress;defense response to bacterium, incompatible interaction;defense response to fungus, incompatible interaction"	OSM34	78.1591	258	325	78.1591	contig_16577	0	392	106.854	281	363	106.854	contig_16577	0	392	70.4052	231	281	70.4052	contig_16577	0	392	85.1394	46.6656	109	161	46.6656	contig_16577	0	392	23.7637	53	73	23.7637
contig_19694	2647.63	1933.18	-2285.27	-14.613	-2285.27	-14.613	118.89	5.64959e-07	1.45802e-05	nonspecific lipid-transfer precursor	465	gi|16323304|gb|AAL15407.1|AT5g59310/mnc17_200 [Arabidopsis thaliana]/gi|8571923|gb|AAF76930.1|lipid transfer protein 4 [Arabidopsis thaliana]/gi|16323386|gb|AAL15187.1|putative nonspecific lipid-transfer protein precursor [Arabidopsis thaliana]/gi|1032281977|gb|OAO96305.1|LTP4 [Arabidopsis thaliana]/gi|18424223|ref|NP_568904.1|lipid transfer protein 4 [Arabidopsis thaliana]/gi|15010686|gb|AAK7400…	64.70%	OAO96305.1;AAK74002.1;Q9LLR6.1;AAP21322.1;NP_568904.1;AAK59520.1;AAL15407.1;AAF76930.1;AAM65751.1;AAO00757.1;AAL15187.1;AED97170.1	calmodulin binding;plasma membrane;lipid transport;response to water deprivation;plant-type cell wall;chloroplast thylakoid;response to salt stress;response to abscisic acid;apoplast	LTP4	2721.92	13426	13426	2721.92	contig_19694	0	465	2141.55	8628	8630	2141.55	contig_19694	0	465	2495.97	11816	11817	2495.97	contig_19694	0	465	2453.15	802.674	3285	3285	802.674	contig_19694	0	465	687.436	2505	2505	687.436
contig_1702	928.433	266.548	-621.2	-4.09104	-621.2	-4.09104	10.0569	0.00433104	0.0123959	---NA---	1219						1043.02	13487	13487	1043.02	contig_1702	0	1219	498.764	5269	5269	498.764	contig_1702	0	1219	924.717	11477	11477	924.717	contig_1702	0	1219	822.168	278.785	2991	2991	278.785	contig_1702	0	1219	236.582	2260	2260	236.582
contig_18472	206.921	116.453	186.272	16.5643	186.272	16.5643	96.1243	1.29231e-06	2.59892e-05	P-loop containing nucleoside triphosphate hydrolases superfamily	322	gi|1032276878|gb|OAO91206.1|hypothetical protein AXX17_AT5G41720 [Arabidopsis thaliana]	71.70%	OAO91206.1	nucleus;cytoplasm;flavonoid metabolic process;flavonoid sulfotransferase activity		9.36863	32	32	9.36863	contig_18472	0	322	14.3342	40	40	14.3342	contig_18472	0	322	12.2008	40	40	12.2008	contig_18472	0	322	11.9679	65.6317	186	186	65.6317	contig_18472	0	322	66.9743	169	169	66.9743
contig_2417	247.853	120.778	196.633	7.12874	196.633	7.12874	18.5493	0.000582487	0.00249745	sequence-specific DNA binding transcription factor	426	gi|6143872|gb|AAF04419.1|AC010927_12unknown protein [Arabidopsis thaliana]	81.25%	AAF04419.1	"transcription factor activity, sequence-specific DNA binding;protein binding;nucleus;plasma membrane;regulation of transcription, DNA-templated;negative regulation of gene expression;regulation of cellular response to hypoxia"		28.9897	116	131	28.9897	contig_2417	0	426	24.3783	83	90	24.3783	contig_2417	0	426	42.8832	167	186	42.8832	contig_2417	0	426	32.0837	105.619	382	396	105.619	contig_2417	0	426	135.995	432	454	135.995
contig_44	274.2	203.72	-246.816	-5.23479	-246.816	-5.23479	134.967	3.44095e-07	1.05287e-05	DNA polymerase epsilon catalytic subunit A	490	gi|8778425|gb|AAF79433.1|AC025808_15F18O14.29 [Arabidopsis thaliana]	46.00%	AAF79433.1			290.126	1508	1508	290.126	contig_44	0	490	315.087	1338	1338	315.087	contig_44	0	490	310.083	1547	1547	310.083	contig_44	0	490	305.099	71.1867	307	307	71.1867	contig_44	0	490	40.8866	157	157	40.8866
contig_3668	211.526	158.906	183.032	20.7224	183.032	20.7224	122.147	5.08367e-07	1.36567e-05	Transmembrane amino acid transporter family	501	gi|2576361|gb|AAC49885.1|lysine and histidine specific transporter [Arabidopsis thaliana]	89.90%	AAC49885.1	amino acid transmembrane transport;amine transmembrane transporter activity;plasma membrane;acidic amino acid transmembrane transporter activity;neutral amino acid transmembrane transporter activity;symporter activity;neutral amino acid transport;integral component of membrane;amino acid import;response to karrikin		13.3599	71	71	13.3599	contig_3668	0	501	10.3644	45	45	10.3644	contig_3668	0	501	4.11686	21	21	4.11686	contig_3668	0	501	9.28039	20.8644	92	92	20.8644	contig_3668	0	501	49.6677	195	195	49.6677
contig_1417	293.669	217.887	240.071	49.2941	240.071	49.2941	40.0361	3.64768e-05	0.000300621	beta subunit	359	"gi|1063694452|ref|NP_001322820.1|Coatomer, beta' subunit [Arabidopsis thaliana]/gi|1039010604|gb|ANM60540.1|Coatomer, beta' subunit [Arabidopsis thaliana]"	60.00%	ANM60540.1;NP_001322820.1	cytosol;membrane	AT1G52360	4.98932	19	19	4.98932	contig_1417	0	359	4.17849	13	13	4.17849	contig_1417	0	359	5.74525	21	21	5.74525	contig_1417	0	359	4.97102	15.1916	48	48	15.1916	contig_1417	0	359	35.1899	99	99	35.1899
contig_18605	406.692	152.927	284.648	4.06166	284.648	4.06166	16.4003	0.000887246	0.00348942	Ribosomal L7Ae L30e S12e Gadd45 family	527	gi|15241537|ref|NP_196435.1|Ribosomal protein L7Ae/L30e/S12e/Gadd45 family protein [Arabidopsis thaliana]/gi|8346555|emb|CAB93719.1|nhp2-like protein [Arabidopsis thaliana]/gi|332003880|gb|AED91263.1|Ribosomal protein L7Ae/L30e/S12e/Gadd45 family protein [Arabidopsis thaliana]/gi|334187516|ref|NP_001190260.1|Ribosomal protein L7Ae/L30e/S12e/Gadd45 family protein [Arabidopsis thaliana]/gi|15215893…	65.67%	AAK55688.1;NP_196435.1;AED91263.1;NP_001190260.1;CAB93719.1;AED91262.1;Q9LEY9.1;OAO93408.1;AAK91490.1	RNA binding;nucleolus;cytosol	AT5G08180	106.078	593	593	106.078	contig_18605	0	527	90.6484	414	414	90.6484	contig_18605	0	527	82.1887	441	441	82.1887	contig_18605	0	527	92.9718	336.334	1560	1560	336.334	contig_18605	0	527	488.881	2019	2019	488.881
contig_2814	396.946	321.971	366.345	24.715	366.345	24.715	246.715	3.20372e-08	2.12722e-06	cyclic nucleotide gated channel 9	835	gi|38503202|sp|Q9LNJ0.2|CNG10_ARATHRecName: Full=Probable cyclic nucleotide-gated ion channel 10 AltName: Full=CaM-regulated potassium ion channel AltName: Full=Cyclic nucleotide- and calmodulin-regulated ion channel 10/gi|1032299470|gb|OAP13795.1|CNGC10 [Arabidopsis thaliana]/gi|332189153|gb|AEE27274.1|cyclic nucleotide gated channel 10 [Arabidopsis thaliana]/gi|334182216|ref|NP_001184885.1|cycl…	53.60%	AEE27274.1;NP_001184885.1;Q9LNJ0.2;OAP13795.1	voltage-gated potassium channel activity;calmodulin binding;plasma membrane;ligand-gated ion channel activity;metal ion transport;cyclic nucleotide binding	CNGC10	19.7576	175	175	19.7576	contig_2814	0	835	25.4274	184	184	25.4274	contig_2814	0	835	21.29	181	181	21.29	contig_2814	0	835	22.1583	12.6547	93	93	12.6547	contig_2814	0	835	14.6711	96	96	14.6711
contig_5405	172.857	101.169	157.47	5.86564	157.47	5.86564	100.37	1.0926e-06	2.30449e-05	glutamine synthetase	1657	gi|75309209|sp|Q9FMD9.1|GLN14_ARATHRecName: Full=Glutamine synthetase cytosolic isozyme 1-4 AltName: Full=Glutamate--ammonia ligase GLN14 Short=GLN14/gi|22136142|gb|AAM91149.1|glutamine synthetase [Arabidopsis thaliana]/gi|18418013|ref|NP_568335.1|glutamine synthetase 14 [Arabidopsis thaliana]/gi|1032275984|gb|OAO90312.1|GLN1 [Arabidopsis thaliana]/gi|16649125|gb|AAL24414.1|glutamine synthetase […	94.70%	NP_568335.1;Q9FMD9.1;AAM91149.1;AAL24414.1;OAO90312.1;AED92312.1;BAB10184.1	glutamate-ammonia ligase activity;copper ion binding;protein binding;ATP binding;cell wall;vacuole;plasma membrane;glutamine biosynthetic process;nitrogen fixation;plasmodesma;chloroplast stroma;response to salt stress;chloroplast envelope;leaf senescence;cytosolic ribosome;nitrate assimilation;response to cadmium ion;apoplast	GLN1	34.1359	600	600	34.1359	contig_5405	0	1657	30.7105	441	441	30.7105	contig_5405	0	1657	32.2449	544	544	32.2449	contig_5405	0	1657	32.3637	73.7813	1076	1076	73.7813	contig_5405	0	1657	101.963	1324	1324	101.963
contig_91	296.935	221.299	248.888	33.9366	248.888	33.9366	30.6684	9.74988e-05	0.000628858	beta subunit	921	"gi|30683862|ref|NP_850592.1|Coatomer, beta' subunit [Arabidopsis thaliana]/gi|75329793|sp|Q8L828.1|COB23_ARATHRecName: Full=Coatomer subunit beta'-3 AltName: Full=Beta'-coat protein 3 Short=Beta'-COP 3/gi|21539583|gb|AAM53344.1|putative coatomer complex subunit [Arabidopsis thaliana]/gi|24899747|gb|AAN65088.1|putative coatomer complex subunit [Arabidopsis thaliana]/gi|332642234|gb|AEE75755.1|Coa…	80.00%	NP_850592.1;AAM53344.1;AEE75755.1;Q8L828.1;AAN65088.1	Golgi membrane;structural molecule activity;cytosol;plasma membrane;intracellular protein transport;integral component of membrane;vesicle-mediated transport;COPI vesicle coat	AT3G15980	8.18865	74	80	8.18865	contig_91	0	921	7.01615	53	56	7.01615	contig_91	0	921	7.46488	64	70	7.46488	contig_91	0	921	7.55656	18.505	140	150	18.505	contig_91	0	921	35.6083	240	257	35.6083
contig_4864	323.662	258.795	-288.942	-4.04614	-288.942	-4.04614	116.502	6.11505e-07	1.54494e-05	---NA---	419						377.762	1655	1679	377.762	contig_4864	0	419	399.048	1426	1449	399.048	contig_4864	0	419	374.582	1585	1598	374.582	contig_4864	0	419	383.797	75.3854	272	278	75.3854	contig_4864	0	419	96.5434	313	317	96.5434
contig_972	305.704	81.4968	206.204	4.7381	206.204	4.7381	14.1103	0.00146739	0.00521687	phenylalanine ammonia lyase	487	"gi|62319599|dbj|BAD95069.1|phenylalanine ammonia lyase, partial [Arabidopsis thaliana]"	86.30%	BAD95069.1	protein binding;cytosol;L-phenylalanine catabolic process;defense response;response to oxidative stress;pollen development;response to wounding;cinnamic acid biosynthetic process;drought recovery;response to UV-B;phenylalanine ammonia-lyase activity;salicylic acid catabolic process;lignin catabolic process;response to karrikin		151.183	781	781	151.183	contig_972	0	487	174.863	738	738	174.863	contig_972	0	487	135.527	671	672	135.527	contig_972	0	487	153.858	52.2608	224	224	52.2608	contig_972	0	487	41.4005	158	158	41.4005
contig_19977	716.274	635.421	-654.592	-4.88277	-654.592	-4.88277	75.1256	3.35112e-06	5.2014e-05	Peroxidase superfamily	416	gi|1402912|emb|CAA66961.1|peroxidase [Arabidopsis thaliana]/gi|1032297162|gb|OAP11488.1|hypothetical protein AXX17_AT2G33920 [Arabidopsis thaliana]	81.10%	OAP11488.1;CAA66961.1	peroxidase activity;extracellular region;cytosol;response to oxidative stress;plant-type cell wall;plant-type cell wall organization;heme binding;hydrogen peroxide catabolic process;metal ion binding;rhythmic process;defense response to fungus;oxidation-reduction process		856.152	3697	3778	856.152	contig_19977	0	416	821.048	2902	2960	821.048	contig_19977	0	416	792.342	3281	3356	792.342	contig_19977	0	416	823.181	360.253	1289	1319	360.253	contig_19977	0	416	139.878	442	456	139.878
contig_4482	305.683	91.105	210.266	4.78718	210.266	4.78718	13.5805	0.00166438	0.00577507	phenylalanine ammonia lyase	732	gi|19310727|gb|AAL85094.1|putative phenylalanine ammonia lyase PAL1 [Arabidopsis thaliana]/gi|330254247|gb|AEC09341.1|PHE ammonia lyase 1 [Arabidopsis thaliana]/gi|15028193|gb|AAK76593.1|putative phenylalanine ammonia lyase PAL1 [Arabidopsis thaliana]/gi|15228074|ref|NP_181241.1|PHE ammonia lyase 1 [Arabidopsis thaliana]/gi|20197947|gb|AAM15324.1|phenylalanine ammonia lyase (PAL1) [Arabidopsis th…	94.50%	AAO29949.1;NP_181241.1;AEC09341.1;AAK76593.1;P35510.3;AAL85094.1;OAP08830.1;AAM15324.1;AAP59438.1	protein binding;cytosol;L-phenylalanine catabolic process;defense response;response to oxidative stress;pollen development;response to wounding;cinnamic acid biosynthetic process;drought recovery;response to UV-B;phenylalanine ammonia-lyase activity;salicylic acid catabolic process;lignin catabolic process;response to karrikin	PAL1	130.847	1016	1016	130.847	contig_4482	0	732	169.145	1073	1073	169.145	contig_4482	0	732	116.062	865	865	116.062	contig_4482	0	732	138.685	55.5685	358	358	55.5685	contig_4482	0	732	41.6643	239	239	41.6643
contig_1236	179.098	121.24	139.957	4.64801	139.957	4.64801	27.5644	0.000143634	0.000845098	kinase C-like zinc finger	626	gi|1032305173|gb|OAP19498.1|hypothetical protein AXX17_AT1G53450 [Arabidopsis thaliana]	67.86%	OAP19498.1	thioredoxin-disulfide reductase activity;cytosol;pollen tube growth;pollen tube guidance;response to cadmium ion;regulation of pollen tube growth		42.6181	272	283	42.6181	contig_1236	0	626	41.4742	218	225	41.4742	contig_1236	0	626	41.2635	249	263	41.2635	contig_1236	0	626	41.7853	31.5814	173	174	31.5814	contig_1236	0	626	48.9232	231	240	48.9232
contig_6894	228.364	74.509	143.225	5.18865	143.225	5.18865	7.2325	0.0114739	0.0275615	germin	465	gi|17473703|gb|AAL38307.1|germin-like protein [Arabidopsis thaliana]/gi|20148495|gb|AAM10138.1|germin-like protein [Arabidopsis thaliana]	65.20%	AAL38307.1;AAM10138.1	nucleus;response to cold;plant-type cell wall;response to cytokinin;extracellular matrix;apoplast;oxalate oxidase activity		41.9662	207	207	41.9662	contig_6894	0	465	39.7043	160	160	39.7043	contig_6894	0	465	20.9106	99	99	20.9106	contig_6894	0	465	34.1937	143.431	587	587	143.431	contig_6894	0	465	174.809	637	637	174.809
contig_29821	333.982	152.014	284.876	11.2989	284.876	11.2989	41.4369	3.20856e-05	0.000273235	Major facilitator superfamily	388	gi|1032301182|gb|OAP15507.1|hypothetical protein AXX17_AT1G52830 [Arabidopsis thaliana]	74.33%	OAP15507.1	transporter activity;plasma membrane;oligopeptide transport;response to nematode;integral component of membrane		27.9414	115	115	27.9414	contig_29821	0	388	27.9554	89	94	27.9554	contig_29821	0	388	27.0855	106	107	27.0855	contig_29821	0	388	27.6608	361.067	1184	1233	361.067	contig_29821	0	388	338.424	987	1029	338.424
contig_2905	245.032	190.114	191.903	70.6634	191.903	70.6634	29.9473	0.00010633	0.00067024	UDP-Glycosyltransferase superfamily	454	gi|2191136|gb|AAB61023.1|Similar to UTP-Glucose Glucosyltransferase coded for by A. thaliana cDNA T46230 coded for by A. thaliana cDNA H76538 coded for by A. thaliana cDNA H76290 [Arabidopsis thaliana]	77.00%	AAB61023.1	nucleus;endoplasmic reticulum;chloroplast;response to toxic substance;response to salt stress;lignin biosynthetic process;flavonoid biosynthetic process;xenobiotic catabolic process;flavonoid glucuronidation;quercetin 3-O-glucosyltransferase activity;quercetin 7-O-glucosyltransferase activity		3.73765	18	18	3.73765	contig_2905	0	454	2.79581	11	11	2.79581	contig_2905	0	454	1.73069	8	8	1.73069	contig_2905	0	454	2.75471	13.0138	52	52	13.0138	contig_2905	0	454	25.5778	91	91	25.5778
contig_337	184.981	17.1661	139.434	4.88526	139.434	4.88526	32.3776	7.99573e-05	0.0005418	D-mannose binding lectin with Apple-like carbohydrate-binding domain-containing	310	gi|23397232|gb|AAN31898.1|putative glycoprotein (EP1) [Arabidopsis thaliana]	68.70%	AAN31898.1	vacuolar membrane;Golgi apparatus;cytosol;plasma membrane;plant-type cell wall;carbohydrate binding;apoplast		142.624	437	469	142.624	contig_337	0	310	159.313	396	428	159.313	contig_337	0	310	140.988	410	445	140.988	contig_337	0	310	147.642	30.421	79	83	30.421	contig_337	0	310	32.1078	74	78	32.1078
contig_1721	212.371	79.077	174.661	4.67186	174.661	4.67186	35.6978	5.5825e-05	0.000410938	cinnamyl alcohol dehydrogenase	419	gi|169635572|emb|CAP09666.1|cinnamyl alcohol dehydrogenase [Arabidopsis thaliana]/gi|1032292757|gb|OAP07084.1|AT4CL2 [Arabidopsis thaliana]/gi|169635566|emb|CAP09663.1|cinnamyl alcohol dehydrogenase [Arabidopsis thaliana]/gi|169635568|emb|CAP09664.1|cinnamyl alcohol dehydrogenase [Arabidopsis thaliana]/gi|169635570|emb|CAP09665.1|cinnamyl alcohol dehydrogenase [Arabidopsis thaliana]/gi|169635578|…	92.10%	CAP09669.1;CAP09663.1;CAP09664.1;CAP09665.1;CAP09666.1;OAP07084.1	ATP binding;nucleus;response to UV;response to wounding;response to fungus;phenylpropanoid metabolic process;4-coumarate-CoA ligase activity		144.895	644	644	144.895	contig_1721	0	419	170.47	619	619	170.47	contig_1721	0	419	116.5	497	497	116.5	contig_1721	0	419	143.955	37.6927	139	139	37.6927	contig_1721	0	419	45.3785	149	149	45.3785
contig_14423	299.799	84.3517	262.094	100.507	262.094	100.507	39.3288	3.89795e-05	0.000315648	cellulase 5	446	gi|21554174|gb|AAM63253.1|putative beta-glucanase [Arabidopsis thaliana]	83.80%	AAM63253.1	extracellular region;Golgi apparatus;cytosol;plasma membrane;nitrogen compound metabolic process;cellulase activity;plant-type cell wall;plasmodesma;cellulose catabolic process;cell wall organization;positive regulation of urease activity		3.38195	16	16	3.38195	contig_14423	0	446	0.77617	3	3	0.77617	contig_14423	0	446	3.74368	17	17	3.74368	contig_14423	0	446	2.63393	175.526	689	689	175.526	contig_14423	0	446	150.211	525	525	150.211
contig_7193	226.316	124.095	164.632	23.7947	164.632	23.7947	23.7111	0.00024643	0.0012768	nonspecific lipid-transfer	533	gi|15224898|ref|NP_181387.1|lipid transfer protein 2 [Arabidopsis thaliana]/gi|16649115|gb|AAL24409.1|putative nonspecific lipid-transfer protein [Arabidopsis thaliana]/gi|77999978|dbj|BAE46870.1|cell growth defect factor -3 [Arabidopsis thaliana]/gi|11386952|sp|Q9S7I3.1|NLTP2_ARATHRecName: Full=Non-specific lipid-transfer protein 2 Short=LTP 2 AltName: Full=Protein CELL GROWTH DEFECT FACTOR 3 Fl…	46.00%	AAF76928.1;Q9S7I3.1;AAL24409.1;BAE46870.1;OAP11476.1;AAC67365.1;AAC24829.1;NP_181387.1;AEC09546.1;AAM63016.1;AAM10124.1		LTP2	15.3877	87	87	15.3877	contig_7193	0	533	9.95866	46	46	9.95866	contig_7193	0	533	4.4225	24	24	4.4225	contig_7193	0	533	9.92296	13.8562	65	65	13.8562	contig_7193	0	533	2.39414	10	10	2.39414
contig_13996	431.607	229.784	394.355	10.8999	394.355	10.8999	127.923	4.24388e-07	1.21752e-05	cysteine synthase C1	365	gi|1063718139|ref|NP_001327883.1|cysteine synthase C1 [Arabidopsis thaliana]/gi|1039016482|gb|ANM65950.1|cysteine synthase C1 [Arabidopsis thaliana]	70.00%	NP_001327883.1;ANM65950.1	cysteine synthase activity;copper ion binding;mitochondrion;cysteine biosynthetic process from serine;immune response;chloroplast;cyanide catabolic process;pyridoxal phosphate binding;L-3-cyanoalanine synthase activity;detoxification of nitrogen compound;root hair cell development	CYSC1	43.9074	170	170	43.9074	contig_13996	0	365	36.0398	114	114	36.0398	contig_13996	0	365	39.5557	147	147	39.5557	contig_13996	0	365	39.8343	210.743	677	677	210.743	contig_13996	0	365	222.003	635	635	222.003
contig_14719	263.292	115.676	-198.32	-5.89223	-198.32	-5.89223	23.9095	0.000239231	0.00124894	---NA---	428						201.099	789	913	201.099	contig_14719	0	428	284.163	938	1054	284.163	contig_14719	0	428	231.314	893	1008	231.314	contig_14719	0	428	238.858	49.1117	161	185	49.1117	contig_14719	0	428	20.8704	64	70	20.8704
contig_4423	180.953	109.775	142.5	6.40628	142.5	6.40628	51.1383	1.45511e-05	0.000151128	bZIP transcription factor family	310	gi|44888356|sp|Q39162.2|TGA4_ARATHRecName: Full=Transcription factor TGA4 AltName: Full=Ocs element-binding factor 4 Short=OBF4 AltName: Full=bZIP transcription factor 57 Short=AtbZIP57/gi|332004102|gb|AED91485.1|TGACG motif-binding factor 4 [Arabidopsis thaliana]/gi|1039019776|gb|ANM68901.1|TGACG motif-binding factor 4 [Arabidopsis thaliana]/gi|7960722|emb|CAB92044.1|transcription factor OBF4 [A…	70.70%	NP_001330618.1;AED91485.1;AED91484.1;NP_001330616.1;ABD85167.1;NP_001330617.1;ANM68901.1;ANM68900.1;NP_196565.1;NP_001190270.1;CAB92044.1;ANM68902.1;BAF01214.1;Q39162.2	"transcription factor activity, sequence-specific DNA binding;calmodulin binding;nucleus;transcription, DNA-templated;regulation of transcription, DNA-templated;response to cold;defense response to bacterium;sequence-specific DNA binding;transcription regulatory region DNA binding"	TGA4	34.0595	112	112	34.0595	contig_4423	0	310	36.8505	99	99	36.8505	contig_4423	0	310	30.4154	96	96	30.4154	contig_4423	0	310	33.7752	34.8192	95	95	34.8192	contig_4423	0	310	26.3449	64	64	26.3449
contig_17464	181.139	85.9268	134.194	4.87532	134.194	4.87532	15.0769	0.00117749	0.00436928	---NA---	509						32.4117	175	175	32.4117	contig_17464	0	509	43.2998	191	191	43.2998	contig_17464	0	509	28.1721	146	146	28.1721	contig_17464	0	509	34.6279	92.6375	415	415	92.6375	contig_17464	0	509	60.9209	243	243	60.9209
contig_4442	446.682	392.194	-418.929	-4.14048	-418.929	-4.14048	445.109	3.08813e-09	4.96287e-07	actin depolymerizing factor 5	660	gi|332661042|gb|AEE86442.1|actin depolymerizing factor 9 [Arabidopsis thaliana]/gi|145353169|ref|NP_195223.2|actin depolymerizing factor 9 [Arabidopsis thaliana]/gi|334302760|sp|O49606.2|ADF9_ARATHRecName: Full=Actin-depolymerizing factor 9 Short=ADF-9 Short=AtADF9/gi|1032284195|gb|OAO98522.1|ADF9 [Arabidopsis thaliana]	82.40%	O49606.2;NP_195223.2;AEE86442.1;OAO98522.1	actin binding;cytoplasm;actin cytoskeleton;actin filament polymerization;actin filament depolymerization	ADF9	563.203	3931	3943	563.203	contig_4442	0	660	547.93	3126	3134	547.93	contig_4442	0	660	545.845	3656	3668	545.845	contig_4442	0	660	552.326	203.14	1168	1180	203.14	contig_4442	0	660	191.412	980	990	191.412
contig_4503	219.488	176.925	211.255	44.6601	211.255	44.6601	655.214	6.63259e-10	1.99084e-07	Zinc finger (C3HC4-type RING finger) family	330	gi|1032276501|gb|OAO90829.1|hypothetical protein AXX17_AT5G60170 [Arabidopsis thaliana]	56.50%	OAO90829.1	plasma membrane		37.1374	130	130	37.1374	contig_4503	0	330	27.6238	79	79	27.6238	contig_4503	0	330	25.8934	87	87	25.8934	contig_4503	0	330	30.2182	5.16457	15	15	5.16457	contig_4503	0	330	4.64029	12	12	4.64029
contig_481	170.77	119.767	148.266	4.06932	148.266	4.06932	85.3706	2.04636e-06	3.63593e-05	---NA---	575						44.9226	274	274	44.9226	contig_481	0	575	58.9997	294	294	58.9997	contig_481	0	575	40.9947	240	240	40.9947	contig_481	0	575	48.3057	68.1723	345	345	68.1723	contig_481	0	575	81.891	369	369	81.891
contig_10810	161.822	71.0273	141.004	4.1626	141.004	4.1626	72.378	3.86752e-06	5.7569e-05	transcription factor bHLH155	1497	gi|1032294907|gb|OAP09233.1|CPUORF7 [Arabidopsis thaliana]	63.60%	OAP09233.1	"regulation of transcription, DNA-templated;intracellular membrane-bounded organelle;primary metabolic process;cellular macromolecule metabolic process;cytoplasmic part"		46.0969	732	732	46.0969	contig_10810	0	1497	44.5529	578	578	44.5529	contig_10810	0	1497	43.105	657	657	43.105	contig_10810	0	1497	44.5849	104.209	1373	1373	104.209	contig_10810	0	1497	125.392	1471	1471	125.392
contig_6525	242.368	112.053	-223.763	-7.17576	-223.763	-7.17576	128.064	4.2256e-07	1.21357e-05	O-methyltransferase family	474	gi|1032281214|gb|OAO95542.1|OMT1 [Arabidopsis thaliana]	82.30%	OAO95542.1	nucleus;cytosol;plasma membrane;plasmodesma;chloroplast;lignin biosynthetic process;acetylserotonin O-methyltransferase activity;melatonin biosynthetic process;luteolin O-methyltransferase activity;quercetin 3-O-methyltransferase activity;methylation;myricetin 3'-O-methyltransferase activity;protein dimerization activity;caffeate O-methyltransferase activity;flavonol biosynthetic process		273.866	1377	1377	273.866	contig_6525	0	474	259.75	1067	1067	259.75	contig_6525	0	474	246.37	1189	1189	246.37	contig_6525	0	474	259.995	36.4353	152	152	36.4353	contig_6525	0	474	31.4982	117	117	31.4982
contig_10911	374.7	238.01	316.308	15.6262	316.308	15.6262	47.7601	1.88338e-05	0.000183982	Pathogenesis-related thaumatin superfamily	489	gi|887390|emb|CAA61411.1|osmotin [Arabidopsis thaliana]	62.10%	CAA61411.1	"extracellular region;response to salt stress;defense response to bacterium, incompatible interaction;defense response to fungus, incompatible interaction"		30.6528	134	159	30.6528	contig_10911	0	489	41.0592	146	174	41.0592	contig_10911	0	489	24.5039	103	122	24.5039	contig_10911	0	489	32.072	29.0441	97	125	29.0441	contig_10911	0	489	15.3965	47	59	15.3965
contig_12984	429.244	298.357	366.85	4.41018	366.85	4.41018	106.571	8.6536e-07	1.95459e-05	pointed first leaf	426	"gi|332192166|gb|AEE30287.1|Ribosomal protein S13/S18 family [Arabidopsis thaliana]/gi|145713258|gb|ABP96577.1|pointed first leaf [Arabidopsis thaliana]/gi|332193538|gb|AEE31659.1|Ribosomal protein S13/S18 family [Arabidopsis thaliana]/gi|145713264|gb|ABP96580.1|pointed first leaf [Arabidopsis thaliana]/gi|145713278|gb|ABP96587.1|pointed first leaf [Arabidopsis thaliana]/gi|145713254|gb|ABP96575.…	97.67%	CAA72909.1;ABP96583.1;ABP96581.1;AAM64976.1;AAG12853.1;CAA82274.1;ABP96589.1;ABP96587.1;ABP96585.1;NP_192718.1;AEE82800.1;CAB78103.1;CAB39647.1;NP_173692.1;ABP96571.1;ABP96590.1;ABF59028.1;ABP96577.1;ABP96579.1;ABP96573.1;ABP96575.1;AAK59471.1;NP_564434.1;AAC25506.1;OAP14104.1;AAP21347.1;AAG12534.1;ABP96582.1;ABP96580.1;AAM63849.1;AAL47500.1;CAA82275.1;OAP00728.1;CAA82273.1;ABP96588.1;ABP96586.1;…	mRNA binding;structural constituent of ribosome;protein binding;cell wall;nucleolus;vacuolar membrane;Golgi apparatus;plasma membrane;translational initiation;plasmodesma;rRNA binding;cytosolic small ribosomal subunit;ribosome biogenesis	AT1G34030	115.959	521	524	115.959	contig_12984	0	426	109.702	403	405	109.702	contig_12984	0	426	97.0637	420	421	97.0637	contig_12984	0	426	107.575	436.879	1637	1638	436.879	contig_12984	0	426	526.308	1757	1757	526.308
contig_14997	702.565	420.804	582.035	10.0153	582.035	10.0153	66.0243	5.50203e-06	7.43152e-05	Plant invertase pectin methylesterase inhibitor superfamily	668	gi|332010217|gb|AED97600.1|Plant invertase/pectin methylesterase inhibitor superfamily protein [Arabidopsis thaliana]/gi|8809649|dbj|BAA97200.1|ripening-related protein-like contains similarity to pectinesterase [Arabidopsis thaliana]/gi|30697666|ref|NP_201042.2|Plant invertase/pectin methylesterase inhibitor superfamily protein [Arabidopsis thaliana]/gi|28393132|gb|AAO41999.1|putative DC1.2 homo…	68.00%	AAO41999.1;NP_201042.2;BAA97200.1;AED97600.1	shade avoidance;negative regulation of catalytic activity;pectinesterase inhibitor activity	AT5G62360	77.619	550	550	77.619	contig_14997	0	668	53.7222	311	311	53.7222	contig_14997	0	668	62.341	424	424	62.341	contig_14997	0	668	64.5608	567.592	3337	3337	567.592	contig_14997	0	668	756.287	3959	3959	756.287
contig_3315	180.058	131.886	163.99	17.106	163.99	17.106	304.713	1.38919e-08	1.27961e-06	Calmodulin-binding	768	gi|332197389|gb|AEE35510.1|Calmodulin binding protein-like protein [Arabidopsis thaliana]/gi|186495165|ref|NP_565074.2|Calmodulin binding protein-like protein [Arabidopsis thaliana]/gi|1032302942|gb|OAP17267.1|SARD1 [Arabidopsis thaliana]/gi|75169776|sp|Q9C9T2.1|SARD1_ARATHRecName: Full=Protein SAR DEFICIENT 1/gi|12324199|gb|AAG52065.1|AC012679_3putative calmodulin-binding protein 77122-73705 [Ar…	65.90%	AAG52065.1;AEE35510.1;NP_565074.2;Q9C9T2.1;OAP17267.1	"defense response to oomycetes;transcription factor activity, sequence-specific DNA binding;calmodulin binding;nucleus;regulation of transcription, DNA-templated;regulation of systemic acquired resistance;response to UV-B;defense response to bacterium;sequence-specific DNA binding;cellular response to molecule of bacterial origin;regulation of salicylic acid biosynthetic process;positive regulati…	SARD1	36.0884	294	294	36.0884	contig_3315	0	768	35.6088	237	237	35.6088	contig_3315	0	768	39.5168	309	309	39.5168	contig_3315	0	768	37.0713	8.72866	59	59	8.72866	contig_3315	0	768	12.1294	73	73	12.1294
contig_1048	209.384	76.3733	191.114	7.52563	191.114	7.52563	53.536	1.22332e-05	0.000133095	pyrophosphate-dependent phosphofructo-1-kinase	1666	gi|19699124|gb|AAL90928.1|AT4g26270/T25K17_80 [Arabidopsis thaliana]/gi|1032286132|gb|OAP00460.1|PFK3 [Arabidopsis thaliana]/gi|15146208|gb|AAK83587.1|AT4g26270/T25K17_80 [Arabidopsis thaliana]/gi|18416717|ref|NP_567742.1|phosphofructokinase 3 [Arabidopsis thaliana]/gi|75164938|sp|Q94AA4.1|PFKA3_ARATHRecName: Full=ATP-dependent 6-phosphofructokinase 3 Short=ATP-PFK 3 Short=Phosphofructokinase 3 A…	87.90%	NP_567742.1;AAL90928.1;OAP00460.1;Q94AA4.1;AEE85178.1;AAK83587.1	6-phosphofructokinase activity;ATP binding;plasma membrane;6-phosphofructokinase complex;fructose 6-phosphate metabolic process;glycolytic process;root epidermal cell differentiation;metal ion binding	PFK3	29.0851	514	514	29.0851	contig_1048	0	1666	26.5274	383	383	26.5274	contig_1048	0	1666	32.2475	547	547	32.2475	contig_1048	0	1666	29.2867	113.825	1669	1669	113.825	contig_1048	0	1666	143.387	1872	1872	143.387
contig_7066	612.9	321.98	477.248	7.66198	477.248	7.66198	38.5493	4.19919e-05	0.00033373	heat shock 60-2	332	"gi|34098917|gb|AAQ56841.1|At3g23990 [Arabidopsis thaliana]/gi|332643321|gb|AEE76842.1|heat shock protein 60 [Arabidopsis thaliana]/gi|9294668|dbj|BAB03017.1|chaperonin hsp60, mitochondrial precursor (HSP60) [Arabidopsis thaliana]/gi|12644189|sp|P29197.2|CH60A_ARATHRecName: Full=Chaperonin CPN60, mitochondrial AltName: Full=HSP60 Flags: Precursor/gi|20466256|gb|AAM20445.1|mitochondrial chaperonin…	89.70%	AAQ56841.1;NP_189041.1;AAM20445.1;BAB03017.1;OAP03825.1;P29197.2;AEE76842.1	copper ion binding;ATP binding;mitochondrial matrix;vacuolar membrane;Golgi apparatus;plasma membrane;'de novo' protein folding;inflammatory response;response to heat;chloroplast stroma;response to cytokinin;chloroplast envelope;cytosolic ribosome;protein refolding;protein binding involved in protein folding;protein import into mitochondrial intermembrane space;response to cadmium ion;unfolded pr…	HSP60	74.9632	236	264	74.9632	contig_7066	0	332	73.6831	197	212	73.6831	contig_7066	0	332	66.2665	205	224	66.2665	contig_7066	0	332	71.6376	465.776	1265	1361	465.776	contig_7066	0	332	679.166	1628	1767	679.166
contig_199	164.505	141.292	150.048	15.2858	150.048	15.2858	231.564	4.11543e-08	2.48706e-06	lysine histidine transporter 1	506	gi|1063735345|ref|NP_001332682.1|lysine histidine transporter 1 [Arabidopsis thaliana]/gi|1039022201|gb|ANM71133.1|lysine histidine transporter 1 [Arabidopsis thaliana]/gi|1063729189|ref|NP_001318716.1|lysine histidine transporter 1 [Arabidopsis thaliana]/gi|1039022202|gb|AED94594.2|lysine histidine transporter 1 [Arabidopsis thaliana]	89.10%	ANM71133.1;NP_001332682.1;NP_001318716.1;AED94594.2	amino acid transmembrane transport;amine transmembrane transporter activity;plasma membrane;acidic amino acid transmembrane transporter activity;neutral amino acid transmembrane transporter activity;symporter activity;neutral amino acid transport;integral component of membrane;amino acid import;response to karrikin	LHT1	13.6005	71	73	13.6005	contig_199	0	506	12.0864	50	53	12.0864	contig_199	0	506	5.82311	29	30	5.82311	contig_199	0	506	10.5033	13.6973	59	61	13.6973	contig_199	0	506	39.8459	153	158	39.8459
contig_6409	197.169	109.503	-170.349	-5.08729	-170.349	-5.08729	43.6518	2.64066e-05	0.000236637	2-oxoglutarate (2OG) and Fe(II)-dependent oxygenase superfamily	608	gi|1063712416|ref|NP_001326059.1|2-oxoglutarate (2OG) and Fe(II)-dependent oxygenase superfamily protein [Arabidopsis thaliana]/gi|332642660|gb|AEE76181.1|2-oxoglutarate (2OG) and Fe(II)-dependent oxygenase superfamily protein [Arabidopsis thaliana]/gi|27754245|gb|AAO22576.1|unknown protein [Arabidopsis thaliana]/gi|1032288416|gb|OAP02743.1|hypothetical protein AXX17_AT3G20210 [Arabidopsis thalia…	67.00%	NP_566624.1;AAO22576.1;BAB01697.1;ANM64006.1;NP_001326059.1;AEE76181.1;OAP02743.1	cytoplasm;flavonoid biosynthetic process;flavonol synthase activity;response to karrikin;cellular response to toxic substance	AT3G19010	201.258	1130	1298	201.258	contig_6409	0	608	233.059	1048	1228	233.059	contig_6409	0	608	201.764	1077	1249	201.764	contig_6409	0	608	212.027	40.9258	173	219	40.9258	contig_6409	0	608	35.8897	154	171	35.8897
contig_3277	177.192	123.506	151.01	19.3049	151.01	19.3049	95.6025	1.3199e-06	2.6427e-05	cytochrome family subfamily polypeptide 1	2037	"gi|15239304|ref|NP_198460.1|cytochrome P450, family 716, subfamily A, polypeptide 1 [Arabidopsis thaliana]/gi|332006662|gb|AED94045.1|cytochrome P450, family 716, subfamily A, polypeptide 1 [Arabidopsis thaliana]/gi|8777295|dbj|BAA96885.1|cytochrome P450-like [Arabidopsis thaliana]"	54.60%	BAA96885.1;AED94045.1;NP_198460.1	"monooxygenase activity;binding;response to stress;multicellular organism development;steroid metabolic process;response to red or far red light;oxidoreductase activity, acting on paired donors, with incorporation or reduction of molecular oxygen;regulation of biological quality;organic hydroxy compound metabolic process"	CYP716A1	8.19152	177	177	8.19152	contig_3277	0	2037	8.55374	151	151	8.55374	contig_3277	0	2037	8.00389	166	166	8.00389	contig_3277	0	2037	8.24972	24.8771	446	446	24.8771	contig_3277	0	2037	27.9397	446	446	27.9397
contig_2442	349.633	306.915	322.04	13.4193	322.04	13.4193	216.025	5.41403e-08	2.95814e-06	acidic endochitinase	349	gi|2342457|dbj|BAA21872.1|acidic endochitinase [Arabidopsis thaliana]	65.70%	BAA21872.1	"hydrolase activity, hydrolyzing O-glycosyl compounds;extracellular region;macromolecule catabolic process;response to cold;response to wounding;response to light intensity;response to salt stress;cellular response to water deprivation"		24.3108	90	90	24.3108	contig_2442	0	349	28.4343	86	86	28.4343	contig_2442	0	349	25.0466	88	89	25.0466	contig_2442	0	349	25.9306	49.4851	152	152	49.4851	contig_2442	0	349	43.1454	118	118	43.1454
contig_2866	179.726	138.632	151.867	26.0095	151.867	26.0095	123.982	4.79602e-07	1.30774e-05	serine threonine kinase	652	gi|1032284114|gb|OAO98441.1|CRK8 [Arabidopsis thaliana]	82.20%	OAO98441.1	protein serine/threonine kinase activity;ATP binding;mitochondrion;plasma membrane;protein phosphorylation;plasmodesma;integral component of membrane;defense response to bacterium		6.79567	47	47	6.79567	contig_2866	0	652	6.9022	39	39	6.9022	contig_2866	0	652	4.51916	30	30	4.51916	contig_2866	0	652	6.07234	5.57647	32	32	5.57647	contig_2866	0	652	9.59016	49	49	9.59016
contig_6508	298.288	194.369	258.586	91.2853	258.586	91.2853	54.9958	1.10462e-05	0.000123712	Peroxidase superfamily	803	gi|26397870|sp|Q9LXG3.1|PER56_ARATHRecName: Full=Peroxidase 56 Short=Atperox P56 AltName: Full=ATP33 Flags: Precursor/gi|15242237|ref|NP_197022.1|Peroxidase superfamily protein [Arabidopsis thaliana]/gi|23296746|gb|AAN13160.1|putative prx10 peroxidase [Arabidopsis thaliana]/gi|1032276450|gb|OAO90778.1|hypothetical protein AXX17_AT5G14670 [Arabidopsis thaliana]/gi|110736795|dbj|BAF00358.1|prx10 pe…	64.90%	OAO90778.1;Q9LXG3.1;AED92125.1;CAB89328.1;NP_197022.1;AAN13160.1;AAL59994.1;BAF00358.1	peroxidase activity;response to desiccation;response to cold;plant-type cell wall;plasmodesma;plant-type cell wall organization;lignin metabolic process;hyperosmotic salinity response;oxidation-reduction process;cellular oxidant detoxification	AT5G15180	10.4486	89	89	10.4486	contig_6508	0	803	9.34046	65	65	9.34046	contig_6508	0	803	9.66264	79	79	9.66264	contig_6508	0	803	9.81722	5.09382	36	36	5.09382	contig_6508	0	803	0.317828	2	2	0.317828
contig_15621	180.531	130.437	149.342	21.7518	149.342	21.7518	82.9994	2.28172e-06	3.93692e-05	Peroxidase superfamily	1028	gi|1032288974|gb|OAP03301.1|hypothetical protein AXX17_AT3G23360 [Arabidopsis thaliana]	64.00%	OAP03301.1	peroxidase activity;nucleus;cytoplasm;response to desiccation;response to cold;plant-type cell wall;plasmodesma;cellular process;hyperosmotic salinity response		7.06122	77	77	7.06122	contig_15621	0	1028	7.74509	69	69	7.74509	contig_15621	0	1028	6.78343	71	71	6.78343	contig_15621	0	1028	7.19658	10.721	97	97	10.721	contig_15621	0	1028	9.43405	76	76	9.43405
contig_3844	165.779	124.517	142.955	13.6649	142.955	13.6649	141.165	2.88612e-07	9.19508e-06	S-adenosyl-L-methionine-dependent methyltransferases superfamily	1011	gi|5103811|gb|AAD39641.1|AC007591_6F9L1.6 [Arabidopsis thaliana]/gi|332191148|gb|AEE29269.1|S-adenosyl-L-methionine-dependent methyltransferases superfamily protein [Arabidopsis thaliana]/gi|186478506|ref|NP_683307.2|S-adenosyl-L-methionine-dependent methyltransferases superfamily protein [Arabidopsis thaliana]	57.60%	NP_683307.2;AAD39641.1;AEE29269.1		AT1G15125	15.0126	161	161	15.0126	contig_3844	0	1011	14.381	126	126	14.381	contig_3844	0	1011	4.4688	46	46	4.4688	contig_3844	0	1011	11.2875	20.5663	183	183	20.5663	contig_3844	0	1011	7.06829	56	56	7.06829
contig_6921	151.662	117.402	137.292	9.47395	137.292	9.47395	236.948	3.75821e-08	2.36976e-06	multidrug resistance-associated 3	344	gi|75335108|sp|Q9LK62.1|AB7C_ARATHRecName: Full=ABC transporter C family member 7 Short=ABC transporter ABCC.7 Short=AtABCC7 AltName: Full=ATP-energized glutathione S-conjugate pump 7 AltName: Full=Glutathione S-conjugate-transporting ATPase 7 AltName: Full=Multidrug resistance-associated protein 7/gi|332641775|gb|AEE75296.1|multidrug resistance-associated protein 7 [Arabidopsis thaliana]/gi|1017…	71.60%	AEE75296.1;Q9LK62.1;NP_187917.3;BAB01401.1	plant-type vacuole;vacuolar membrane;plasmodesma;chlorophyll catabolite transmembrane transporter activity;glutathione S-conjugate-exporting ATPase activity;apoplast;response to other organism;transmembrane transport	ABCC7	20.0054	71	73	20.0054	contig_6921	0	344	13.7529	41	41	13.7529	contig_6921	0	344	14.8467	50	52	14.8467	contig_6921	0	344	16.2017	23.4507	65	71	23.4507	contig_6921	0	344	34.8696	91	94	34.8696
contig_2157	175.054	49.2822	144.787	19.497	144.787	19.497	34.9	6.06824e-05	0.000436865	Terpenoid cyclases prenyltransferases superfamily	419	gi|1032298249|gb|OAP12574.1|hypothetical protein AXX17_AT1G32630 [Arabidopsis thaliana]	69.50%	OAP12574.1	cytoplasm;membrane		94.0469	418	418	94.0469	contig_2157	0	419	98.3161	357	357	98.3161	contig_2157	0	419	84.3865	360	360	84.3865	contig_2157	0	419	92.2498	15.9991	59	59	15.9991	contig_2157	0	419	4.5683	15	15	4.5683
contig_14256	275.234	224.143	266.089	15.1909	266.089	15.1909	451.052	2.92959e-09	4.83649e-07	purple acid phosphatase 14	1309	gi|1032278581|gb|OAO92909.1|PAP29 [Arabidopsis thaliana]	67.60%	OAO92909.1	acid phosphatase activity;protein serine/threonine phosphatase activity;extracellular region;plasmodesma;dephosphorylation		17.5004	243	243	17.5004	contig_14256	0	1309	19.3934	220	220	19.3934	contig_14256	0	1309	19.3582	258	258	19.3582	contig_14256	0	1309	18.7507	49.6493	572	572	49.6493	contig_14256	0	1309	47.8651	491	491	47.8651
contig_6782	203.681	143.691	-193.606	-6.23582	-193.606	-6.23582	235.441	3.85415e-08	2.41766e-06	---NA---	383						230.141	935	935	230.141	contig_6782	0	383	229.275	761	761	229.275	contig_6782	0	383	232.334	906	906	232.334	contig_6782	0	383	230.584	48.3555	163	163	48.3555	contig_6782	0	383	28.6535	86	86	28.6535
contig_402	205.073	121.967	183.669	12.4492	183.669	12.4492	52.8246	1.28695e-05	0.000138085	SPFH Band 7 PHB domain-containing membrane-associated family	1095	gi|75262692|sp|Q9FM19.1|HIR1_ARATHRecName: Full=Hypersensitive-induced response protein 1 Short=AtHIR1/gi|17065548|gb|AAL32928.1|hypersensitive-induced response protein [Arabidopsis thaliana]/gi|1032275878|gb|OAO90206.1|HIR4 [Arabidopsis thaliana]/gi|10177452|dbj|BAB10843.1|hypersensitive-induced response protein [Arabidopsis thaliana]/gi|15241939|ref|NP_201080.1|SPFH/Band 7/PHB domain-containing…	66.90%	Q9FM19.1;AED97649.1;AAM63689.1;BAB10843.1;NP_201080.1;AAL32928.1;AAM47891.1;OAO90206.1	protein serine/threonine kinase activity;ATP binding;nucleus;mitochondrion;vacuolar membrane;Golgi apparatus;cytosol;plasma membrane;protein phosphorylation;plasmodesma;chloroplast;protein histidine kinase binding;defense response to fungus	HIR1	58.0267	674	674	58.0267	contig_402	0	1095	66.2837	629	629	66.2837	contig_402	0	1095	70.9491	791	791	70.9491	contig_402	0	1095	65.0865	17.2247	166	166	17.2247	contig_402	0	1095	18.5294	159	159	18.5294
contig_748	197.377	92.7711	179.396	72.8276	179.396	72.8276	26.8749	0.000157381	0.000905015	ACC oxidase 1	1786	gi|13877865|gb|AAK44010.1|AF370195_1putative 1-aminocyclopropane-1-carboxylate oxidase [Arabidopsis thaliana]/gi|17065606|gb|AAL33783.1|putative 1-aminocyclopropane-1-carboxylate oxidase [Arabidopsis thaliana]/gi|15224803|ref|NP_179549.1|ACC oxidase 1 [Arabidopsis thaliana]/gi|4191788|gb|AAD10157.1|1-aminocyclopropane-1-carboxylate oxidase [Arabidopsis thaliana]/gi|330251804|gb|AEC06898.1|ACC oxi…	73.80%	AEC06898.1;Q9ZUN4.1;AAD10157.1;NP_179549.1;OAP10668.1;AAL33783.1;AAK44010.1	"aconitate hydratase activity;copper ion binding;mitochondrion;vacuole;cytosol;plasma membrane;tricarboxylic acid cycle;isocitrate metabolic process;response to oxidative stress;plasmodesma;chloroplast;response to fungus;response to salt stress;ethylene biosynthetic process;1-aminocyclopropane-1-carboxylate oxidase activity;response to cadmium ion;mRNA 5'-UTR binding;apoplast;dioxygenase activity…	ACO1	1.37238	26	26	1.37238	contig_748	0	1786	2.3259	36	36	2.3259	contig_748	0	1786	3.79448	69	69	3.79448	contig_748	0	1786	2.49759	76.6589	1205	1205	76.6589	contig_748	0	1786	121.32	1698	1698	121.32
contig_6138	191.225	109.72	145.489	58.2061	145.489	58.2061	25.7544	0.000183425	0.00101737	---NA---	664						2.27161	16	16	2.27161	contig_6138	0	664	1.21647	7	7	1.21647	contig_6138	0	664	4.14166	28	28	4.14166	contig_6138	0	664	2.54325	26.3517	154	154	26.3517	contig_6138	0	664	39.397	205	205	39.397
contig_5715	1174.14	495.326	774.185	9.15046	774.185	9.15046	13.2735	0.00179371	0.00612806	myo-inositol oxygenase 1	1309	gi|332659777|gb|AEE85177.1|myo-inositol oxygenase 4 [Arabidopsis thaliana]/gi|1032284444|gb|OAO98771.1|MIOX4 [Arabidopsis thaliana]/gi|334186932|ref|NP_001190844.1|myo-inositol oxygenase 4 [Arabidopsis thaliana]/gi|4539422|emb|CAB38955.1|putative protein [Arabidopsis thaliana]/gi|7269477|emb|CAB79481.1|putative protein [Arabidopsis thaliana]	84.80%	CAB79481.1;OAO98771.1;NP_001190844.1;CAB38955.1;AEE85177.1	iron ion binding;cytoplasm;syncytium formation;inositol catabolic process;L-ascorbic acid biosynthetic process;inositol oxygenase activity;oxidation-reduction process	MIOX4	118.11	1640	1640	118.11	contig_5715	0	1309	92.1185	1045	1045	92.1185	contig_5715	0	1309	74.7315	996	996	74.7315	contig_5715	0	1309	94.9866	1248.87	14387	14388	1248.87	contig_5715	0	1309	725.873	7445	7446	725.873
contig_1224	166.59	113.572	135.29	7.9581	135.29	7.9581	36.25	5.27455e-05	0.000395319	Aldolase-type TIM barrel family	1645	gi|1032290941|gb|OAP05268.1|HAOX1 [Arabidopsis thaliana]	81.90%	OAP05268.1	"peroxisome;cytosol;glycolate oxidase activity;oxidative photosynthetic carbon pathway;FMN binding;defense response signaling pathway, resistance gene-independent;defense response to bacterium;hydrogen peroxide biosynthetic process;very-long-chain-(S)-2-hydroxy-acid oxidase activity;long-chain-(S)-2-hydroxy-long-chain-acid oxidase activity;medium-chain-(S)-2-hydroxy-acid oxidase activity;oxidatio…		19.3701	338	338	19.3701	contig_1224	0	1645	20.2723	289	289	20.2723	contig_1224	0	1645	18.688	313	313	18.688	contig_1224	0	1645	19.4435	52.4934	760	760	52.4934	contig_1224	0	1645	48.0954	620	620	48.0954
contig_7495	177.78	58.0593	161.035	5.39099	161.035	5.39099	154.541	2.02353e-07	7.12157e-06	DNA ligase	296	gi|1039008120|gb|ANM58274.1|DNA ligase-like protein [Arabidopsis thaliana]/gi|1063695486|ref|NP_001320722.1|DNA ligase-like protein [Arabidopsis thaliana]	83.00%	NP_001320722.1;ANM58274.1	nucleus	AT1G75150	33.7595	106	106	33.7595	contig_7495	0	296	39.763	100	102	39.763	contig_7495	0	296	36.4994	110	110	36.4994	contig_7495	0	296	36.6739	145.096	374	378	145.096	contig_7495	0	296	151.75	350	352	151.75
contig_10532	174.198	110.384	140.313	26.344	140.313	26.344	50.0412	1.57943e-05	0.000160215	2-oxoglutarate (2OG) and Fe(II)-dependent oxygenase superfamily	1206	gi|1032301296|gb|OAP15621.1|hypothetical protein AXX17_AT1G73200 [Arabidopsis thaliana]	65.40%	OAP15621.1	metabolic process;leaf senescence;dioxygenase activity		10.9437	140	140	10.9437	contig_10532	0	1206	9.56804	100	100	9.56804	contig_10532	0	1206	8.95838	110	110	8.95838	contig_10532	0	1206	9.82336	5.74697	61	61	5.74697	contig_10532	0	1206	4.23243	40	40	4.23243
contig_11875	147.694	85.5955	135.132	15.5564	135.132	15.5564	191.533	8.70134e-08	4.06212e-06	Raffinose synthase family	338	gi|332646145|gb|AEE79666.1|seed imbibition 2 [Arabidopsis thaliana]/gi|42572711|ref|NP_974451.1|seed imbibition 2 [Arabidopsis thaliana]	93.50%	NP_974451.1;AEE79666.1	mRNA binding;response to oxidative stress;response to cold;plasmodesma;chloroplast;raffinose catabolic process;galactinol-sucrose galactosyltransferase activity;raffinose alpha-galactosidase activity;response to karrikin	SIP2	6.97277	25	25	6.97277	contig_11875	0	338	7.51063	22	22	7.51063	contig_11875	0	338	13.3667	46	46	13.3667	contig_11875	0	338	9.28338	60.1718	179	179	60.1718	contig_11875	0	338	57.0083	151	151	57.0083
contig_10565	282.593	220.453	254.696	17.2975	254.696	17.2975	196.409	7.88064e-08	3.81125e-06	pathogenesis-related 4	564	gi|332640604|gb|AEE74125.1|pathogenesis-related 4 [Arabidopsis thaliana]/gi|6175186|gb|AAF04912.1|AC011437_27hevein-like protein precursor [Arabidopsis thaliana]/gi|407248|gb|AAA20642.1|pre-hevein-like protein [Arabidopsis thaliana]/gi|1170247|sp|P43082.1|HEVL_ARATHRecName: Full=Hevein-like preproprotein Contains: RecName: Full=CB-HEL Contains: RecName: Full=CD-HEL AltName: Full=RNase Flags: Prec…	85.00%	NP_187123.1;AAK48963.1;AAN15365.1;P43082.1;AAF04912.1;AAA20642.1;AAM66966.1;AEE74125.1;OAP06433.1	"plant-type vacuole;ribonuclease activity;chitinase activity;extracellular region;amino sugar metabolic process;chitin binding;response to virus;systemic acquired resistance;response to salt stress;response to ethylene;defense response to fungus, incompatible interaction;killing of cells of other organism;defense response to bacterium;response to herbivore"	PR4	15.5448	93	93	15.5448	contig_10565	0	564	19.8455	97	97	19.8455	contig_10565	0	564	11.4934	66	66	11.4934	contig_10565	0	564	15.6279	24.9804	124	124	24.9804	contig_10565	0	564	14.9328	66	66	14.9328
contig_5674	160.772	103.815	134.587	15.1891	134.587	15.1891	64.2863	6.09343e-06	8.03024e-05	lysine histidine transporter 1	351	gi|1063735345|ref|NP_001332682.1|lysine histidine transporter 1 [Arabidopsis thaliana]/gi|1039022201|gb|ANM71133.1|lysine histidine transporter 1 [Arabidopsis thaliana]/gi|1063729189|ref|NP_001318716.1|lysine histidine transporter 1 [Arabidopsis thaliana]/gi|1039022202|gb|AED94594.2|lysine histidine transporter 1 [Arabidopsis thaliana]	86.40%	ANM71133.1;NP_001332682.1;NP_001318716.1;AED94594.2	amino acid transmembrane transport;amine transmembrane transporter activity;plasma membrane;acidic amino acid transmembrane transporter activity;neutral amino acid transmembrane transporter activity;symporter activity;neutral amino acid transport;integral component of membrane;amino acid import;response to karrikin	LHT1	11.549	43	43	11.549	contig_5674	0	351	10.1912	31	31	10.1912	contig_5674	0	351	6.71566	24	24	6.71566	contig_5674	0	351	9.48527	21.0408	65	65	21.0408	contig_5674	0	351	33.8106	93	93	33.8106
contig_10306	167.7	110.894	122.021	4.68081	122.021	4.68081	24.2251	0.000228315	0.00120615	calmodulin-like 38	1216	gi|22136314|gb|AAM91235.1|calmodulin-like protein [Arabidopsis thaliana]/gi|20466362|gb|AAM20498.1|calmodulin-like protein [Arabidopsis thaliana]	64.20%	AAM20498.1;AAM91235.1	calcium ion binding;nucleus;cytoplasm;plasma membrane;response to wounding;regulation of flower development;response to ozone;regulation of nitric oxide metabolic process		29.9251	384	386	29.9251	contig_10306	0	1216	36.2493	380	382	36.2493	contig_10306	0	1216	33.2773	412	412	33.2773	contig_10306	0	1216	33.1506	47.6533	510	510	47.6533	contig_10306	0	1216	41.8713	399	399	41.8713
contig_5128	159.388	53.3316	124.488	7.56599	124.488	7.56599	31.02	9.35248e-05	0.000609186	steroid sulfotransferase	968	gi|332003715|gb|AED91098.1|sulfotransferase 2A [Arabidopsis thaliana]/gi|21537216|gb|AAM61557.1|steroid sulfotransferase-like protein [Arabidopsis thaliana]/gi|75153823|sp|Q8L5A7.1|SOT15_ARATHRecName: Full=Cytosolic sulfotransferase 15 Short=AtSOT15 AltName: Full=Sulfotransferase 2a Short=AtST2a/gi|1032278470|gb|OAO92798.1|ST2A [Arabidopsis thaliana]/gi|31711860|gb|AAP68286.1|At5g07010 [Arabidops…	62.00%	AAM61557.1;AAM20660.1;NP_568177.1;Q8L5A7.1;AED91098.1;OAO92798.1;AAP68286.1	cytoplasm;jasmonic acid metabolic process;response to jasmonic acid;flavonoid metabolic process;intracellular membrane-bounded organelle;hydroxyjasmonate sulfotransferase activity;flavonoid sulfotransferase activity	ST2A	17.6273	181	181	17.6273	contig_5128	0	968	19.6688	165	165	19.6688	contig_5128	0	968	19.5824	193	193	19.5824	contig_5128	0	968	18.9595	77.2338	658	658	77.2338	contig_5128	0	968	79.3595	602	602	79.3595
contig_2062	209.467	75.0491	149.175	4.14309	149.175	4.14309	17.8283	0.000667563	0.00279009	phenylalanine ammonia lyase	333	"gi|62321196|dbj|BAD94354.1|phenylalanine ammonia lyase, partial [Arabidopsis thaliana]"	81.70%	BAD94354.1	protein binding;cytosol;L-phenylalanine catabolic process;defense response;response to oxidative stress;pollen development;response to wounding;cinnamic acid biosynthetic process;drought recovery;response to UV-B;phenylalanine ammonia-lyase activity;salicylic acid catabolic process;lignin catabolic process;response to karrikin		112.956	366	399	112.956	contig_2062	0	333	130.291	347	376	130.291	contig_2062	0	333	88.1884	269	299	88.1884	contig_2062	0	333	110.479	39.5795	101	116	39.5795	contig_2062	0	333	52.1161	124	136	52.1161
contig_9857	140.438	122.07	135.183	19.2015	135.183	19.2015	315.923	1.2039e-08	1.17227e-06	basic helix-loop-helix (bHLH) DNA-binding superfamily	673	"gi|27311655|gb|AAO00793.1|bHLH transcription factor, putative [Arabidopsis thaliana]/gi|30023696|gb|AAP13381.1|At1g51070 [Arabidopsis thaliana]/gi|12320783|gb|AAG50538.1|AC079828_9bHLH transcription factor, putative [Arabidopsis thaliana]/gi|15223710|ref|NP_175518.1|basic helix-loop-helix (bHLH) DNA-binding superfamily protein [Arabidopsis thaliana]/gi|21553747|gb|AAM62840.1|bHLH transcription f…	80.25%	Q9C682.1;AAG50538.1;NP_175518.1;AAP13381.1;AEE32618.1;AAM10965.1;AAO00793.1;AAM62840.1;OAP12327.1		bHLH115	18.6302	133	133	18.6302	contig_9857	0	673	31.5481	184	184	31.5481	contig_9857	0	673	25.977	178	178	25.977	contig_9857	0	673	25.3851	9.96079	59	59	9.96079	contig_9857	0	673	7.2052	38	38	7.2052
contig_15405	181.196	81.0361	166.5	6.53012	166.5	6.53012	31.2795	9.07209e-05	0.000595192	---NA---	459						25.2624	123	123	25.2624	contig_15405	0	459	37.4579	149	149	37.4579	contig_15405	0	459	27.6033	129	129	27.6033	contig_15405	0	459	30.1079	160.653	649	649	160.653	contig_15405	0	459	141.231	508	508	141.231
contig_723	461.823	292.448	365.019	4.41783	365.019	4.41783	50.8274	1.48906e-05	0.000153513	60S acidic ribosomal family	408	gi|332009495|gb|AED96878.1|60S acidic ribosomal protein family [Arabidopsis thaliana]/gi|334188456|ref|NP_001119450.2|60S acidic ribosomal protein family [Arabidopsis thaliana]	89.50%	NP_001119450.2;AED96878.1	"cytoplasmic translation;structural constituent of ribosome;nucleus;plasma membrane;translational elongation;cytosolic large ribosomal subunit;preribosome, large subunit precursor;large ribosomal subunit rRNA binding"	AT5G57290	106.518	461	461	106.518	contig_723	0	408	113.976	403	403	113.976	contig_723	0	408	99.9015	415	415	99.9015	contig_723	0	408	106.799	441.115	1584	1584	441.115	contig_723	0	408	561.725	1796	1796	561.725
contig_1543	136.716	31.9372	107.513	4.1066	107.513	4.1066	25.2029	0.000198219	0.00108064	D-mannose binding lectin with Apple-like carbohydrate-binding domain-containing	992	gi|23397232|gb|AAN31898.1|putative glycoprotein (EP1) [Arabidopsis thaliana]	61.70%	AAN31898.1	vacuolar membrane;Golgi apparatus;cytosol;plasma membrane;plant-type cell wall;plasmodesma;response to cytokinin;apoplast		132.855	1373	1398	132.855	contig_1543	0	992	147.96	1251	1272	147.96	contig_1543	0	992	122.078	1212	1233	122.078	contig_1543	0	992	134.298	32.0703	274	280	32.0703	contig_1543	0	992	31.902	241	248	31.902
contig_3678	128.849	116.534	112.019	4.13725	112.019	4.13725	56.4821	9.98189e-06	0.00011491	cinnamyl alcohol dehydrogenase 9	435	gi|15227106|ref|NP_179780.1|cinnamyl alcohol dehydrogenase homolog 3 [Arabidopsis thaliana]/gi|75337294|sp|Q9SJ10.1|CADH3_ARATHRecName: Full=Cinnamyl alcohol dehydrogenase 3 Short=AtCAD3/gi|4417281|gb|AAD20406.1|putative cinnamyl-alcohol dehydrogenase [Arabidopsis thaliana]/gi|31880035|gb|AAP59431.1|cinnamyl alcohol dehydrogenase-like protein [Arabidopsis thaliana]/gi|330252141|gb|AEC07235.1|cinn…	76.50%	NP_179780.1;AAD20406.1;AEC07235.1;AAP59431.1;Q9SJ10.1	"defense response to insect;glutamate-cysteine ligase activity;ATP binding;glutathione biosynthetic process;zinc ion binding;response to heat;chloroplast stroma;indole phytoalexin biosynthetic process;response to cytokinin;response to jasmonic acid;lignin biosynthetic process;defense response to bacterium, incompatible interaction;flower development;response to ozone;glucosinolate biosynthetic pr…	CAD3	37.2753	172	172	37.2753	contig_3678	0	435	32.3624	122	122	32.3624	contig_3678	0	435	37.4803	166	166	37.4803	contig_3678	0	435	35.706	25.5973	98	98	25.5973	contig_3678	0	435	56.3235	192	192	56.3235
contig_12618	188.448	98.4458	-153.748	-4.29649	-153.748	-4.29649	40.9477	3.35398e-05	0.000282295	Dormancy auxin associated family	343	gi|1032305157|gb|OAP19482.1|hypothetical protein AXX17_AT1G48490 [Arabidopsis thaliana]/gi|1027923606|sp|F4HV65.1|DRMH4_ARATHRecName: Full=Dormancy-associated protein homolog 4 AltName: Full=DRM1 homolog 4/gi|332194922|gb|AEE33043.1|Dormancy/auxin associated family protein [Arabidopsis thaliana]/gi|15221029|ref|NP_175809.1|Dormancy/auxin associated family protein [Arabidopsis thaliana]	59.80%	NP_175809.1;AEE33043.1;F4HV65.1;OAP19482.1		AT1G54070	183.596	668	668	183.596	contig_12618	0	343	215.979	642	642	215.979	contig_12618	0	343	201.587	704	704	201.587	contig_12618	0	343	200.387	73.5386	222	222	73.5386	contig_12618	0	343	27.5306	74	74	27.5306
contig_8709	134.312	74.9415	113.281	5.936	113.281	5.936	52.215	1.34479e-05	0.000143024	Major facilitator superfamily	1973	gi|1032286850|gb|OAP01178.1|PMT6 [Arabidopsis thaliana]	74.40%	OAP01178.1	sugar:proton symporter activity;galactose transmembrane transporter activity;glucose transmembrane transporter activity;myo-inositol transmembrane transporter activity;integral component of plasma membrane;lateral root formation;D-xylose transmembrane transporter activity;glycerol transmembrane transporter activity;mannitol transmembrane transporter activity;sorbitol transmembrane transporter act…		50.8867	1063	1065	50.8867	contig_8709	0	1973	51.1157	872	874	51.1157	contig_8709	0	1973	42.2634	843	849	42.2634	contig_8709	0	1973	48.0886	23.1503	401	402	23.1503	contig_8709	0	1973	21.6668	335	335	21.6668
contig_13745	220.51	163.789	193.832	19.5731	193.832	19.5731	166.163	1.522e-07	5.85583e-06	Plant basic secretory (BSP) family	594	gi|19699336|gb|AAL91278.1|At2g15220/F15A23.4 [Arabidopsis thaliana]/gi|18397757|ref|NP_565369.1|Plant basic secretory protein (BSP) family protein [Arabidopsis thaliana]/gi|330251282|gb|AEC06376.1|Plant basic secretory protein (BSP) family protein [Arabidopsis thaliana]/gi|1032293635|gb|OAP07961.1|hypothetical protein AXX17_AT2G10370 [Arabidopsis thaliana]/gi|4585909|gb|AAD25570.1|expressed prote…	77.75%	AAK31145.1;AAD25570.1;AAL91278.1;OAP07961.1;NP_565369.1;AEC06376.1	extracellular region;cytoplasm;defense response	AT2G15220	8.57017	54	54	8.57017	contig_13745	0	594	8.35319	43	43	8.35319	contig_13745	0	594	14.3852	87	87	14.3852	contig_13745	0	594	10.4362	36.7258	192	192	36.7258	contig_13745	0	594	24.9201	116	116	24.9201
contig_7275	527.231	437.88	-462.064	-4.73792	-462.064	-4.73792	87.2635	1.87992e-06	3.42936e-05	peroxidase ATP2a	578	gi|62320162|dbj|BAD94372.1|putative peroxidase ATP2a [Arabidopsis thaliana]	80.20%	BAD94372.1	peroxidase activity;extracellular region;cytosol;response to oxidative stress;plant-type cell wall;plant-type cell wall organization;heme binding;hydrogen peroxide catabolic process;metal ion binding;rhythmic process;defense response to fungus;oxidation-reduction process		580.31	3558	3558	580.31	contig_7275	0	578	621.073	3111	3111	621.073	contig_7275	0	578	555.654	3269	3270	555.654	contig_7275	0	578	585.679	238.053	1211	1211	238.053	contig_7275	0	578	107.959	489	489	107.959
contig_8389	157.044	52.5795	140.477	4.71595	140.477	4.71595	58.1167	8.95518e-06	0.000106065	4-cumarate-COA-	433	gi|30695037|ref|NP_849793.1|4-coumarate:CoA ligase 1 [Arabidopsis thaliana]/gi|332194578|gb|AEE32699.1|4-coumarate:CoA ligase 1 [Arabidopsis thaliana]/gi|19715624|gb|AAL91633.1|At1g51680/F19C24_11 [Arabidopsis thaliana]/gi|22137134|gb|AAM91412.1|At1g51680/F19C24_11 [Arabidopsis thaliana]	90.00%	AAL91633.1;AEE32699.1;NP_849793.1;AAM91412.1	ATP binding;nucleus;cytoplasm;response to UV;response to wounding;response to fungus;phenylpropanoid metabolic process;4-coumarate-CoA ligase activity	4CL1	120.833	555	555	120.833	contig_8389	0	433	137.243	515	515	137.243	contig_8389	0	433	103.433	456	456	103.433	contig_8389	0	433	120.503	35.9492	137	137	35.9492	contig_8389	0	433	35.6595	121	121	35.6595
contig_20874	490.66	287.512	388.41	9.72915	388.41	9.72915	38.3734	4.27113e-05	0.000338042	---NA---	520						48.5863	268	268	48.5863	contig_20874	0	520	36.1705	163	163	36.1705	contig_20874	0	520	48.7305	258	258	48.7305	contig_20874	0	520	44.4957	401.823	1839	1839	401.823	contig_20874	0	520	370.063	1508	1508	370.063
contig_339	606.363	419.276	-493.048	-4.69007	-493.048	-4.69007	63.391	6.42913e-06	8.34373e-05	Peroxidase superfamily	688	gi|25453201|sp|Q96510.1|PER35_ARATHRecName: Full=Peroxidase 35 Short=Atperox P35 AltName: Full=ATP21a Flags: Precursor/gi|6522917|emb|CAB62104.1|peroxidase ATP21a [Arabidopsis thaliana]/gi|332645090|gb|AEE78611.1|Peroxidase superfamily protein [Arabidopsis thaliana]/gi|15229646|ref|NP_190565.1|Peroxidase superfamily protein [Arabidopsis thaliana]/gi|110743356|dbj|BAE99565.1|peroxidase ATP21a [Ara…	85.80%	Q96510.1;AEE78611.1;CAB62104.1;NP_190565.1;BAE99565.1;CAA67339.1	peroxidase activity;protein binding;extracellular region;response to oxidative stress;response to salt stress;heme binding;hydrogen peroxide catabolic process;metal ion binding;oxidation-reduction process	AT3G49960	722.934	5274	5276	722.934	contig_339	0	688	589.029	3512	3512	589.029	contig_339	0	688	568.028	3979	3979	568.028	contig_339	0	688	626.663	213.864	1292	1295	213.864	contig_339	0	688	148.752	802	802	148.752
contig_2401	133.145	106.98	119.846	10.1443	119.846	10.1443	171.928	1.331e-07	5.28904e-06	cotton fiber	902	gi|1032275738|gb|OAO90066.1|hypothetical protein AXX17_AT5G06420 [Arabidopsis thaliana]	53.00%	OAO90066.1			31.8768	305	305	31.8768	contig_2401	0	902	33.3891	261	261	33.3891	contig_2401	0	902	26.5685	244	244	26.5685	contig_2401	0	902	30.6115	16.2495	129	129	16.2495	contig_2401	0	902	11.7422	83	83	11.7422
contig_34550	132.854	104.956	118.345	9.20148	118.345	9.20148	76.8426	3.07183e-06	4.86988e-05	peroxidase	530	gi|42494611|gb|AAS17636.1|peroxidase ATPA2 [Arabidopsis thaliana]/gi|1032279498|gb|OAO93826.1|PRX53 [Arabidopsis thaliana]/gi|21593262|gb|AAM65211.1|peroxidase [Arabidopsis thaliana]	72.00%	AAM65211.1;OAO93826.1;AAS17636.1	defense response to nematode;peroxidase activity;binding;extracellular region;vacuolar membrane;Golgi apparatus;metabolic process;plant-type cell wall;response to salt stress;flower development;response to zinc ion		45.0015	253	253	45.0015	contig_34550	0	530	25.6907	118	118	25.6907	contig_34550	0	530	26.1293	141	141	26.1293	contig_34550	0	530	32.2738	22.5097	105	105	22.5097	contig_34550	0	530	6.74155	28	28	6.74155
contig_8017	146.441	101.997	127.54	26.6958	127.54	26.6958	139.193	3.04968e-07	9.63168e-06	UDP-glucosyltransferase 73B2	1073	gi|1032283295|gb|OAO97622.1|UGT73B2 [Arabidopsis thaliana]	56.50%	OAO97622.1	abscisic acid glucosyltransferase activity;flavonol 3-O-glucosyltransferase activity;flavonol biosynthetic process;response to other organism;quercetin 3-O-glucosyltransferase activity;quercetin 7-O-glucosyltransferase activity		3.86576	44	44	3.86576	contig_8017	0	1073	5.80717	54	54	5.80717	contig_8017	0	1073	5.21746	57	57	5.21746	contig_8017	0	1073	4.96346	13.554	128	128	13.554	contig_8017	0	1073	16.6497	140	140	16.6497
contig_7884	144.082	50.2474	128.587	34.7737	128.587	34.7737	105.388	9.0379e-07	2.01014e-05	retroelement pol poly	873	gi|8778610|gb|AAF79618.1|AC027665_19F5M15.26 [Arabidopsis thaliana]	75.13%	AAF79618.1			2.80764	26	26	2.80764	contig_7884	0	873	6.47667	49	49	6.47667	contig_7884	0	873	2.13759	19	19	2.13759	contig_7884	0	873	3.8073	72.3631	556	556	72.3631	contig_7884	0	873	86.5336	592	592	86.5336
contig_8851	831.849	635.469	-739.556	-6.59001	-739.556	-6.59001	75.424	3.30037e-06	5.14644e-05	BTB and TAZ domain 2	332	gi|1039014448|gb|ANM64075.1|BTB and TAZ domain protein 2 [Arabidopsis thaliana]/gi|1063715627|ref|NP_001326126.1|BTB and TAZ domain protein 2 [Arabidopsis thaliana]	79.80%	NP_001326126.1;ANM64075.1	"transcription cofactor activity;histone acetyltransferase activity;calmodulin binding;nucleus;cytoplasm;regulation of transcription, DNA-templated;circadian rhythm;zinc ion binding;response to cold;embryo sac development;pollen development;response to wounding;response to salt stress;auxin-activated signaling pathway;abscisic acid-activated signaling pathway;response to salicylic acid;response t…	BT2	925.397	3259	3259	925.397	contig_8851	0	332	781.667	2249	2249	781.667	contig_8851	0	332	908.502	3070	3071	908.502	contig_8851	0	332	871.855	349.417	1021	1021	349.417	contig_8851	0	332	168.35	438	438	168.35
contig_4391	572.056	415.885	-485.647	-5.63434	-485.647	-5.63434	87.276	1.87888e-06	3.42936e-05	nucleotide sugar epimerase	1737	"gi|15229524|ref|NP_189024.1|UDP-D-glucuronate 4-epimerase 6 [Arabidopsis thaliana]/gi|75311206|sp|Q9LIS3.1|GAE6_ARATHRecName: Full=UDP-glucuronate 4-epimerase 6 AltName: Full=UDP-glucuronic acid epimerase 6 Short=AtUGlcAE2/gi|17065098|gb|AAL32703.1|nucleotide sugar epimerase-like protein [Arabidopsis thaliana]/gi|332643297|gb|AEE76818.1|UDP-D-glucuronate 4-epimerase 6 [Arabidopsis thaliana]/gi|2…	84.70%	AAK44025.1;OAP06987.1;AEE76818.1;AAM91705.1;Q9LIS3.1;BAB03000.1;CAI53858.1;AAL07003.1;NP_189024.1;AAL32703.1;AFI41201.1	protein binding;endosome;trans-Golgi network;nucleotide-sugar metabolic process;integral component of membrane;Golgi cisterna membrane;galacturonate biosynthetic process;UDP-glucuronate 4-epimerase activity;coenzyme binding;defense response to Gram-negative bacterium;defense response to fungus	GAE6	564.926	10409	10409	564.926	contig_4391	0	1737	538.556	8106	8107	538.556	contig_4391	0	1737	667.838	11810	11811	667.838	contig_4391	0	1737	590.44	202.45	3095	3095	202.45	contig_4391	0	1737	186.526	2539	2539	186.526
contig_6116	175.685	114.525	142.676	41.7691	142.676	41.7691	20.3366	0.000423314	0.00194052	---NA---	323						3.79422	13	13	3.79422	contig_6116	0	323	2.14348	6	6	2.14348	contig_6116	0	323	4.56114	15	15	4.56114	contig_6116	0	323	3.49961	36.2319	103	103	36.2319	contig_6116	0	323	65.5818	166	166	65.5818
contig_10594	162.861	105.051	139.511	28.9438	139.511	28.9438	64.4498	6.03451e-06	7.95984e-05	hypothetical protein AXX17_AT1G59860	412	gi|1032302794|gb|OAP17119.1|hypothetical protein AXX17_AT1G59860 [Arabidopsis thaliana]	61.00%	OAP17119.1			4.80512	21	21	4.80512	contig_10594	0	412	5.88156	21	21	5.88156	contig_10594	0	412	4.29101	18	18	4.29101	contig_10594	0	412	4.99256	43.0214	156	156	43.0214	contig_10594	0	412	56.3705	182	182	56.3705
contig_1323	278.826	196.134	-244.84	-4.59776	-244.84	-4.59776	64.1252	6.1522e-06	8.08423e-05	peptide transporter 5	1507	"gi|8920621|gb|AAF81343.1|AC007767_23Contains similarity to a peptide transport protein homolog F17L22.140 gi|7488004 from Arabidopsis thaliana BAC F17L22 gb|AL035527. It contains a POT family domain PF|00854. ESTs gb|BE038248, gb|T22680, gb|T04498, gb|R89961, gb|R30626, gb|R30389, gb|AA713063 and gb|AA585801 come from this gene [Arabidopsis thaliana]"	73.90%	AAF81343.1	plasma membrane;plasmodesma;pollen tube growth;leaf senescence;response to nitrate;nitrate transmembrane transporter activity;symporter activity;nitrate transport;integral component of membrane;nitrate assimilation;dipeptide transporter activity;tripeptide transporter activity;dipeptide transport;tripeptide transport;response to cadmium ion;potassium ion homeostasis		291.573	4661	4661	291.573	contig_1323	0	1507	324.043	4232	4232	324.043	contig_1323	0	1507	323.065	4957	4957	323.065	contig_1323	0	1507	312.894	94.3193	1251	1251	94.3193	contig_1323	0	1507	45.2174	533	534	45.2174
contig_675	150.685	76.3242	107.123	4.07516	107.123	4.07516	12.6893	0.00207649	0.00688875	Adenine nucleotide alpha hydrolases-like superfamily	582	gi|332646842|gb|AEE80363.1|Adenine nucleotide alpha hydrolases-like superfamily protein [Arabidopsis thaliana]/gi|15228790|ref|NP_191814.1|Adenine nucleotide alpha hydrolases-like superfamily protein [Arabidopsis thaliana]/gi|1032287020|gb|OAP01347.1|hypothetical protein AXX17_AT3G56850 [Arabidopsis thaliana]/gi|16323382|gb|AAL15185.1|unknown protein [Arabidopsis thaliana]/gi|14334946|gb|AAK59650…	53.90%	AAK59650.1;AEE80363.1;OAP01347.1;NP_191814.1;AAL15185.1	vacuole;membrane	AT3G62550	37.5792	232	232	37.5792	contig_675	0	582	30.1364	152	152	30.1364	contig_675	0	582	36.789	218	218	36.789	contig_675	0	582	34.8348	49.587	254	254	49.587	contig_675	0	582	50.4292	230	230	50.4292
contig_1184	119.655	61.1262	100.86	4.59381	100.86	4.59381	64.0448	6.18178e-06	8.11303e-05	Acetamidase Formamidase family	1614	gi|18420071|ref|NP_568029.1|Acetamidase/Formamidase family protein [Arabidopsis thaliana]/gi|23297225|gb|AAN12921.1|putative formamidase [Arabidopsis thaliana]/gi|332661412|gb|AEE86812.1|Acetamidase/Formamidase family protein [Arabidopsis thaliana]	88.90%	NP_568029.1;AEE86812.1;AAN12921.1	formamidase activity;vacuole	AT4G37560	63.5488	1088	1088	63.5488	contig_1184	0	1614	64.2012	898	898	64.2012	contig_1184	0	1614	57.1408	939	939	57.1408	contig_1184	0	1614	61.6303	33.7201	479	479	33.7201	contig_1184	0	1614	20.4774	259	259	20.4774
contig_30	118.431	91.3796	103.741	5.12166	103.741	5.12166	162.109	1.67715e-07	6.26688e-06	flavonoid 3 5 -hydroxylase	1399	"gi|1032285296|gb|OAO99623.1|hypothetical protein AXX17_AT4G13790 [Arabidopsis thaliana]/gi|332657712|gb|AEE83112.1|cytochrome P450, family 706, subfamily A, polypeptide 4 [Arabidopsis thaliana]/gi|1032284286|gb|OAO98613.1|hypothetical protein AXX17_AT4G13830 [Arabidopsis thaliana]/gi|5281041|emb|CAB45977.1|flavonoid 3', 5'-hydroxylase-like protein [Arabidopsis thaliana]/gi|15234514|ref|NP_192967…	60.60%	BAC43375.1;NP_192967.1;OAO99623.1;AAO63874.1;OAO98613.1;CAB78273.1;CAB45977.1;AEE83112.1	binding;endoplasmic reticulum;membrane;single-organism metabolic process	CYP706A4	26.0781	387	387	26.0781	contig_30	0	1399	32.5799	395	395	32.5799	contig_30	0	1399	30.9603	441	441	30.9603	contig_30	0	1399	29.8727	32.405	399	399	32.405	contig_30	0	1399	17.1482	188	188	17.1482
contig_87	251.374	195.692	-223.889	-4.13415	-223.889	-4.13415	86.7066	1.92707e-06	3.49084e-05	Na+ H+ exchanger	2343	gi|19919840|gb|AAM08403.1|AF490586_1Na+/H+ exchanger 2 [Arabidopsis thaliana]/gi|1039014547|gb|AEE74178.2|sodium hydrogen exchanger 2 [Arabidopsis thaliana]/gi|84029367|sp|Q56XP4.2|NHX2_ARATHRecName: Full=Sodium/hydrogen exchanger 2 AltName: Full=Na(+)/H(+) exchanger 2 Short=NHE-2/gi|12322846|gb|AAG51408.1|AC009465_8putative sodium proton exchanger 8161-11489 [Arabidopsis thaliana]/gi|1032292443|…	86.30%	AEE74177.1;Q56XP4.2;NP_187154.1;NP_001326210.1;OAP06770.1;ANM64164.1;NP_001319475.1;AAG51408.1;AAM08403.1;AEE74178.2	Golgi membrane;plant-type vacuole;calmodulin binding;extracellular region;vacuolar membrane;endoplasmic reticulum membrane;plasma membrane;response to salt stress;potassium ion import;lithium ion transport;sodium:proton antiporter activity;potassium:proton antiporter activity;integral component of membrane;leaf development;regulation of intracellular pH;potassium ion homeostasis;regulation of sto…	NHX2	292.754	7275	7276	292.754	contig_87	0	2343	279.538	5676	5676	279.538	contig_87	0	2343	313.681	7480	7483	313.681	contig_87	0	2343	295.324	83.8454	1729	1729	83.8454	contig_87	0	2343	62.3062	1144	1144	62.3062
contig_6262	859.826	711.654	-788.322	-7.18467	-788.322	-7.18467	100.941	1.06878e-06	2.26874e-05	Pectinacetylesterase family	1021	"gi|222424560|dbj|BAH20235.1|AT4G19420, partial [Arabidopsis thaliana]"	79.50%	BAH20235.1	extracellular region;cytosol;plasma membrane;plant-type cell wall;plasmodesma;pectin acetylesterase activity;cell wall organization		908.74	9842	9842	908.74	contig_6262	0	1021	873.962	7733	7733	873.962	contig_6262	0	1021	964.657	10028	10028	964.657	contig_6262	0	1021	915.786	218.338	1962	1962	218.338	contig_6262	0	1021	279.213	2234	2234	279.213
contig_5174	153.942	93.2465	126.334	262.534	126.334	262.534	54.5263	1.14116e-05	0.000126944	alpha dioxygenase	1070	gi|6692262|gb|AAF24612.1|AC010870_5feebly-like protein [Arabidopsis thaliana]/gi|15232116|ref|NP_186791.1|Peroxidase superfamily protein [Arabidopsis thaliana]/gi|14595999|gb|AAK68727.1|feebly-like protein [Arabidopsis thaliana]/gi|332640143|gb|AEE73664.1|Peroxidase superfamily protein [Arabidopsis thaliana]/gi|75265810|sp|Q9SGH6.1|DOX1_ARATHRecName: Full=Alpha-dioxygenase 1 Short=Alpha DOX1 AltN…	78.88%	AEE73664.1;Q9SGH6.1;NP_186791.1;AAL47373.1;AAF24612.1;AAL87742.1;AAK68727.1	"fatty acid alpha-oxidation;peroxidase activity;extracellular region;plant-type hypersensitive response;systemic acquired resistance;response to abscisic acid;leaf senescence;monolayer-surrounded lipid storage body;oxidoreductase activity, acting on single donors with incorporation of molecular oxygen, incorporation of two atoms of oxygen;heme binding;oxylipin biosynthetic process;defense respons…	DOX1	1.23346	14	14	1.23346	contig_5174	0	1070	0.215683	2	2	0.215683	contig_5174	0	1070	0	0	0	0	contig_5174	0	1070	0.483049	12.2115	115	115	12.2115	contig_5174	0	1070	17.2927	145	145	17.2927
contig_3454	147.613	110.271	126.149	206.638	126.149	206.638	86.9557	1.9058e-06	3.46509e-05	glutathione S-transferase	393	gi|75339109|sp|Q9ZW24.1|GSTU7_ARATHRecName: Full=Glutathione S-transferase U7 Short=AtGSTU7 AltName: Full=GST class-tau member 7 AltName: Full=Glutathione S-transferase 25/gi|15010756|gb|AAK74037.1|At2g29420/F16P2.20 [Arabidopsis thaliana]/gi|15810097|gb|AAL06974.1|At2g29420/F16P2.20 [Arabidopsis thaliana]/gi|11096010|gb|AAG30137.1|AF288188_1glutathione S-transferase [Arabidopsis thaliana]/gi|330…	70.10%	AAM64426.1;AEC08252.1;Q9ZW24.1;AAK74037.1;AAC95196.1;NP_180503.1;AAL06974.1;AAG30137.1	glutathione transferase activity;cytosol;plasma membrane;glutathione metabolic process;response to oxidative stress;toxin catabolic process;plasmodesma;response to salicylic acid;glutathione binding;response to cadmium ion	GSTU7	0.95951	4	4	0.95951	contig_3454	0	393	0.880844	3	3	0.880844	contig_3454	0	393	0	0	0	0	contig_3454	0	393	0.613451	3.75844	13	13	3.75844	contig_3454	0	393	2.92232	9	9	2.92232
contig_16024	158.47	95.2341	124.421	54.821	124.421	54.821	33.5185	7.04125e-05	0.00048941	CAP (Cysteine-rich secretory Antigen and Pathogenesis-related 1 ) superfamily	460	gi|46358058|gb|AAS65936.2|At2g19990 [Arabidopsis thaliana]/gi|57222182|gb|AAW38998.1|At2g19990 [Arabidopsis thaliana]/gi|1032293805|gb|OAP08131.1|PR-1-like protein [Arabidopsis thaliana]/gi|444318|prf||1906367Apathogenesis-related protein 1-like protein/gi|166805|gb|AAA32841.1|pathogenesis-related protein 1-like precursor [Arabidopsis thaliana]/gi|15225280|ref|NP_179589.1|pathogenesis-related pro…	69.50%	OAP08131.1;NP_179589.1;AAA32841.1;AEC06952.1;AAW38998.1;AAS65936.2;1906367A;AAD24401.1	extracellular region;cell wall;response to water deprivation;response to wounding;systemic acquired resistance;response to ethylene;response to salicylic acid;response to jasmonic acid;response to vitamin B1;defense response to bacterium;response to herbivore;negative regulation of response to salt stress	PR-1-LIKE	2.25433	11	11	2.25433	contig_16024	0	460	2.75934	11	11	2.75934	contig_16024	0	460	1.92163	9	9	1.92163	contig_16024	0	460	2.31176	19.2661	78	78	19.2661	contig_16024	0	460	12.206	44	44	12.206
contig_6924	380.762	321.533	-346.654	-4.0909	-346.654	-4.0909	430.62	3.5221e-09	5.19913e-07	serine hydroxymethyltransferase 2	1130	"gi|30690394|ref|NP_851080.1|serine hydroxymethyltransferase 2 [Arabidopsis thaliana]/gi|1063734095|ref|NP_001331385.1|serine hydroxymethyltransferase 2 [Arabidopsis thaliana]/gi|510120806|sp|Q94C74.2|GLYM2_ARATHRecName: Full=Serine hydroxymethyltransferase 2, mitochondrial Short=AtSHMT2 AltName: Full=Glycine hydroxymethyltransferase 2 AltName: Full=Serine methylase 2 Flags: Precursor/gi|22720262…	84.40%	Q94C74.2;AED93602.1;ANM69726.1;NP_001331385.1;BAH56787.1;OAO91171.1;NP_851080.1	glycine hydroxymethyltransferase activity;protein binding;nucleus;mitochondrial respiratory chain complex I;mitochondrial matrix;plasma membrane;L-serine metabolic process;circadian rhythm;poly(U) RNA binding;zinc ion binding;response to cold;response to light stimulus;chloroplast thylakoid;chloroplast stroma;plant-type hypersensitive response;photorespiration;stromule;glycine decarboxylation via…	SHM2	451.671	5414	5414	451.671	contig_6924	0	1130	437.667	4286	4286	437.667	contig_6924	0	1130	487.084	5604	5604	487.084	contig_6924	0	1130	458.807	116.134	1155	1155	116.134	contig_6924	0	1130	110.669	980	980	110.669
contig_19938	512.748	289.354	441.17	26.0779	441.17	26.0779	81.7024	2.42482e-06	4.10197e-05	CTP synthase family	762	gi|1063723853|ref|NP_001329929.1|CTP synthase family protein [Arabidopsis thaliana]/gi|1039018934|gb|ANM68152.1|CTP synthase family protein [Arabidopsis thaliana]	85.00%	NP_001329929.1;ANM68152.1	CTP synthase activity;ATP binding;cytosol;embryo development ending in seed dormancy;'de novo' CTP biosynthetic process;response to cadmium ion	AT4G20320	17.5677	142	142	17.5677	contig_19938	0	762	18.3232	121	121	18.3232	contig_19938	0	762	16.885	131	131	16.885	contig_19938	0	762	17.592	529.633	3552	3552	529.633	contig_19938	0	762	396.053	2365	2365	396.053
contig_1725	180.371	77.7573	115.026	11.1835	115.026	11.1835	11.8207	0.00260836	0.00825007	endoplasmic reticulum oxidoreductins 2	1602	"gi|50400631|sp|Q9C7S7.1|ERO1_ARATHRecName: Full=Endoplasmic reticulum oxidoreductin-1 Flags: Precursor/gi|12323665|gb|AAG51798.1|AC067754_14disulfide bond formation protein, putative 78451-75984 [Arabidopsis thaliana]/gi|31711714|gb|AAP68213.1|At1g72280 [Arabidopsis thaliana]/gi|110743908|dbj|BAE99788.1|like disulfide bond formation protein [Arabidopsis thaliana]/gi|15218421|ref|NP_177372.1|endo…	84.86%	AEE35298.1;AAG51798.1;BAE99788.1;AAP68213.1;NP_177372.1;Q9C7S7.1	"protein disulfide isomerase activity;nucleus;endoplasmic reticulum membrane;Golgi apparatus;cellular protein modification process;protein disulfide oxidoreductase activity;integral component of membrane;oxidoreductase activity, acting on a sulfur group of donors, disulfide as acceptor;protein folding in endoplasmic reticulum;oxidation-reduction process"	ERO1	11.4162	194	194	11.4162	contig_1725	0	1602	11.7407	163	163	11.7407	contig_1725	0	1602	10.729	175	175	10.729	contig_1725	0	1602	11.2953	25.4618	359	359	25.4618	contig_1725	0	1602	29.2335	367	367	29.2335
contig_30163	155.444	106.086	145.128	15.0963	145.128	15.0963	120.605	5.34241e-07	1.40504e-05	---NA---	459						7.80464	38	38	7.80464	contig_30163	0	459	11.3128	45	45	11.3128	contig_30163	0	459	11.7689	55	55	11.7689	contig_30163	0	459	10.2954	64.1127	259	259	64.1127	contig_30163	0	459	45.5941	164	164	45.5941
contig_6218	289.033	140.256	250.777	12.0033	250.777	12.0033	66.1566	5.46003e-06	7.3968e-05	Major facilitator superfamily	1100	gi|75217952|sp|Q56XQ6.1|PTR15_ARATHRecName: Full=Protein NRT1/ PTR FAMILY 4.4 Short=AtNPF4.4 AltName: Full=Nitrate transporter 1.13/gi|332193474|gb|AEE31595.1|Major facilitator superfamily protein [Arabidopsis thaliana]/gi|42562490|ref|NP_174610.2|Major facilitator superfamily protein [Arabidopsis thaliana]/gi|62320582|dbj|BAD95216.1|nitrate transporter NTL1 [Arabidopsis thaliana]	70.20%	Q56XQ6.1;NP_174610.2;BAD95216.1;AEE31595.1	transporter activity;plasma membrane;oligopeptide transport;response to nematode	AT1G33440	21.254	248	248	21.254	contig_6218	0	1100	22.0291	210	210	22.0291	contig_6218	0	1100	25.0898	281	281	25.0898	contig_6218	0	1100	22.791	310.287	3003	3004	310.287	contig_6218	0	1100	254.404	2193	2193	254.404
contig_874	122.222	97.8457	114.992	15.7197	114.992	15.7197	373.825	6.17617e-09	7.45244e-07	Dof-type zinc finger DNA-binding family	1535	gi|332646746|gb|AEE80267.1|Dof-type zinc finger DNA-binding family protein [Arabidopsis thaliana]/gi|30695501|ref|NP_850734.1|Dof-type zinc finger DNA-binding family protein [Arabidopsis thaliana]/gi|332646747|gb|AEE80268.1|Dof-type zinc finger DNA-binding family protein [Arabidopsis thaliana]/gi|145332923|ref|NP_001078327.1|Dof-type zinc finger DNA-binding family protein [Arabidopsis thaliana]/g…	75.10%	NP_001078327.1;BAC42022.1;AEE80267.1;AEE80268.1;NP_850734.1	"transcription factor activity, sequence-specific DNA binding;nucleus;transcription, DNA-templated;regulation of transcription, DNA-templated;response to cold;response to red or far red light;seed germination;transcription regulatory region DNA binding;metal ion binding"	DAG1	7.0013	114	114	7.0013	contig_874	0	1535	9.39662	125	125	9.39662	contig_874	0	1535	7.03831	110	110	7.03831	contig_874	0	1535	7.81208	25.1668	340	340	25.1668	contig_874	0	1535	17.1252	205	206	17.1252
contig_25029	273.545	122.709	248.376	19.7262	248.376	19.7262	83.7556	2.20315e-06	3.85817e-05	expansin x6	1090	gi|15225530|ref|NP_181500.1|expansin A4 [Arabidopsis thaliana]/gi|20259980|gb|AAM13337.1|putative expansin [Arabidopsis thaliana]/gi|2795809|gb|AAB97125.1|putative expansin [Arabidopsis thaliana]/gi|15294172|gb|AAK95263.1|AF410277_1At2g39700/F17A14.7 [Arabidopsis thaliana]/gi|330254614|gb|AEC09708.1|expansin A4 [Arabidopsis thaliana]/gi|1032294751|gb|OAP09077.1|EXPA4 [Arabidopsis thaliana]/gi|170…	91.40%	O48818.1;AAM13337.1;AAL32761.1;NP_181500.1;AAK95263.1;AEC09708.1;OAP09077.1;AAB97125.1	extracellular region;cytosol;syncytium formation;plant-type cell wall;plasmodesma;chloroplast;response to gibberellin;unidimensional cell growth;plant-type cell wall loosening;plant-type cell wall modification involved in multidimensional cell growth;response to red light;membrane	EXPA4	11.1569	129	129	11.1569	contig_25029	0	1090	18.6319	175	176	18.6319	contig_25029	0	1090	10.0019	111	111	10.0019	contig_25029	0	1090	13.2636	226.303	2170	2171	226.303	contig_25029	0	1090	283.547	2422	2422	283.547
contig_6375	153.043	83.7505	142.599	4.46563	142.599	4.46563	440.331	3.22345e-09	5.05222e-07	receptor serine threonine kinase	422	gi|7268618|emb|CAB78827.1|receptor serine/threonine kinase-like protein [Arabidopsis thaliana]/gi|4375833|emb|CAA16797.1|receptor serine/threonine kinase-like protein [Arabidopsis thaliana]	68.10%	CAA16797.1;CAB78827.1	transmembrane receptor protein serine/threonine kinase activity;plasma membrane;plasmodesma;phosphorylation		104.771	466	469	104.771	contig_6375	0	422	98.9843	360	362	98.9843	contig_6375	0	422	101.009	432	434	101.009	contig_6375	0	422	101.588	42.2711	156	157	42.2711	contig_6375	0	422	49.5917	162	164	49.5917
contig_3768	185.316	38.4904	-152.981	-4.89004	-152.981	-4.89004	37.5471	4.63056e-05	0.000358851	WRKY DNA-binding 26	731	gi|259020292|gb|ACV90430.1|truncated WRKY33 protein [Arabidopsis thaliana]	89.10%	ACV90430.1	"transcription factor activity, sequence-specific DNA binding;protein binding;nucleus;transcription, DNA-templated;regulation of transcription, DNA-templated;response to cold;response to water deprivation;response to salt stress;response to ethylene;response to salicylic acid;response to jasmonic acid;camalexin biosynthetic process;response to chitin;positive regulation of autophagy;defense respo…		204.277	1584	1584	204.277	contig_3768	0	731	153.907	975	975	153.907	contig_3768	0	731	218.737	1628	1628	218.737	contig_3768	0	731	192.307	40.5677	261	261	40.5677	contig_3768	0	731	43.9907	252	252	43.9907
contig_3874	677.419	362.355	525.301	5.76162	525.301	5.76162	31.7641	8.57607e-05	0.000571843	reduced lateral root formation	1065	gi|332004047|gb|AED91430.1|reduced lateral root formation [Arabidopsis thaliana]/gi|332004046|gb|AED91429.1|reduced lateral root formation [Arabidopsis thaliana]/gi|79327401|ref|NP_001031861.1|reduced lateral root formation [Arabidopsis thaliana]/gi|51969432|dbj|BAD43408.1|unknown protein [Arabidopsis thaliana]/gi|75311667|sp|Q9LXD1.1|RLF_ARATHRecName: Full=Cytochrome b5 domain-containing protein…	77.90%	BAD42873.1;AED91430.1;CAB89362.1;AAQ62405.1;BAD43408.1;NP_196530.1;AED91429.1;Q9LXD1.1;NP_001031861.1	extracellular region;nucleus;cytosol;plasma membrane;nitrogen compound metabolic process;plant-type cell wall;plasmodesma;chloroplast;lateral root formation;heme binding;regulation of growth;metal ion binding;nitrate reductase (NADPH) activity;FAD binding	RLF	113.038	1277	1277	113.038	contig_3874	0	1065	110.298	1018	1018	110.298	contig_3874	0	1065	107.623	1167	1167	107.623	contig_3874	0	1065	110.32	475.392	4456	4456	475.392	contig_3874	0	1065	646.427	5394	5395	646.427
contig_3909	114.495	39.7314	93.1474	4.32109	93.1474	4.32109	33.1767	7.31151e-05	0.000503994	homeobox 1	957	gi|16329|emb|CAA41625.1|Athb-1 protein [Arabidopsis thaliana]/gi|399900|sp|Q02283.1|HAT5_ARATHRecName: Full=Homeobox-leucine zipper protein HAT5 AltName: Full=HD-ZIP protein ATHB-1 AltName: Full=Homeodomain transcription factor ATHB-1 AltName: Full=Homeodomain-leucine zipper protein HAT5 Short=HD-ZIP protein 5/gi|1032289550|gb|OAP03877.1|HD-ZIP-1 [Arabidopsis thaliana]/gi|6016706|gb|AAF01532.1|AC…	79.50%	NP_186796.1;AAM19982.1;AAF01532.1;OAP03877.1;Q02283.1;CAA41625.1;AAL25601.1;AEE73670.1	"transcription factor activity, sequence-specific DNA binding;nucleus;transcription, DNA-templated;response to water deprivation;response to blue light;abscisic acid-activated signaling pathway;negative regulation of abscisic acid-activated signaling pathway;negative regulation of cell growth;protein homodimerization activity;sequence-specific DNA binding;positive regulation of transcription, DNA…		63.5375	635	645	63.5375	contig_3909	0	957	68.9691	565	572	68.9691	contig_3909	0	957	65.7855	640	641	65.7855	contig_3909	0	957	66.0973	39.1795	328	330	39.1795	contig_3909	0	957	25.4682	188	191	25.4682
contig_29650	388.2	287.073	-314.362	-4.3031	-314.362	-4.3031	27.3805	0.000147148	0.000860658	---NA---	298						368.862	1161	1166	368.862	contig_29650	0	298	419.743	1075	1084	419.743	contig_29650	0	298	439.997	1326	1335	439.997	contig_29650	0	298	409.534	204.364	531	536	204.364	contig_29650	0	298	81.7889	189	191	81.7889
contig_14570	140.318	106.721	120.081	#DIV/0!	120.081	#DIV/0!	94.1551	1.40037e-06	2.76271e-05	lysyl-tRNA synthetase	366	gi|1032275240|gb|OAO89568.1|hypothetical protein AXX17_AT5G05990 [Arabidopsis thaliana]	73.00%	OAO89568.1	DNA binding;lysine-tRNA ligase activity;ATP binding;nucleus;cytosol;lysyl-tRNA aminoacylation;plasmodesma;metal ion binding		0	0	0	0	contig_14570	0	366	0	0	0	0	contig_14570	0	366	0	0	0	0	contig_14570	0	366	0	0	0	0	0	contig_14570	0	366	0	0	0	0
contig_3693	166.159	129.643	-156.218	-4.08267	-156.218	-4.08267	130.024	3.9819e-07	1.16537e-05	ethylene responsive element binding factor 5	657	gi|21592411|gb|AAM64362.1|contains similarity to ethylene responsive element binding factor [Arabidopsis thaliana]	62.70%	AAM64362.1	"vasculature development;transcription factor activity, sequence-specific DNA binding;protein binding;nucleus;response to cold;ethylene-activated signaling pathway;response to chitin;sequence-specific DNA binding;transcription regulatory region DNA binding;positive regulation of transcription, DNA-templated;defense response to fungus;cell division"		196.005	1366	1366	196.005	contig_3693	0	657	213.745	1217	1217	213.745	contig_3693	0	657	210.934	1411	1411	210.934	contig_3693	0	657	206.895	51.7086	298	299	51.7086	contig_3693	0	657	47.5859	245	245	47.5859
contig_9637	159.96	63.7353	111.902	17.9376	111.902	17.9376	16.4997	0.000869278	0.00343458	---NA---	406						15.5572	67	67	15.5572	contig_9637	0	406	11.6527	41	41	11.6527	contig_9637	0	406	5.8059	24	24	5.8059	contig_9637	0	406	11.0053	11.7538	42	42	11.7538	contig_9637	0	406	3.14305	10	10	3.14305
contig_6424	183.882	119.127	138.708	2776.11	138.708	2776.11	14.6006	0.00131038	0.00476161	---NA---	655						0	0	0	0	contig_6424	0	655	0	0	0	0	contig_6424	0	655	0.149949	1	1	0.149949	contig_6424	0	655	0.0499829	11.2753	65	65	11.2753	contig_6424	0	655	20.0666	103	103	20.0666
contig_14084	118.75	87.2738	92.8751	4.38765	92.8751	4.38765	47.4245	1.93409e-05	0.000187549	---NA---	592						34.715	218	218	34.715	contig_14084	0	592	31.7714	163	163	31.7714	contig_14084	0	592	15.7611	95	95	15.7611	contig_14084	0	592	27.4158	35.1226	183	183	35.1226	contig_14084	0	592	28.8842	134	134	28.8842
contig_6523	204.811	82.7029	165.315	4.90855	165.315	4.90855	36.0872	5.36307e-05	0.000399481	Rab GTPase-like A5A	626	gi|330255118|gb|AEC10212.1|P-loop containing nucleoside triphosphate hydrolases superfamily protein [Arabidopsis thaliana]/gi|3763922|gb|AAC64302.1|Ras-related GTP-binding protein (ARA-4) [Arabidopsis thaliana]/gi|114089|sp|P28187.1|RAA5C_ARATHRecName: Full=Ras-related protein RABA5c Short=AtRABA5c AltName: Full=Ras-related protein Ara-4 AltName: Full=Ras-related protein Rab11F Short=AtRab11F/gi|…	85.70%	AAC64302.1;BAH19889.1;NP_181842.1;ABF83674.1;BAA00831.1;P28187.1;AEC10212.1	Golgi membrane;GTPase activity;protein binding;GTP binding;vacuolar membrane;Golgi stack;Golgi-associated vesicle;trans-Golgi network;cytosol;plasma membrane;small GTPase mediated signal transduction;response to heat;protein transport;inter-Golgi cisterna vesicle-mediated transport	ARA4	43.2205	287	287	43.2205	contig_6523	0	626	43.5019	236	236	43.5019	contig_6523	0	626	40.1652	256	256	40.1652	contig_6523	0	626	42.2958	184.406	1016	1016	184.406	contig_6523	0	626	193.45	948	949	193.45
contig_4205	145.808	89.8958	114.116	12.1206	114.116	12.1206	21.6864	0.000337937	0.00162675	cinnamyl-alcohol dehydrogenase CAD1	564	"gi|222424680|dbj|BAH20294.1|AT4G39330, partial [Arabidopsis thaliana]"	81.10%	BAH20294.1	cytoplasm;zinc ion binding;response to bacterium;response to cytokinin;lignin biosynthetic process;cinnamyl-alcohol dehydrogenase activity;apoplast;sinapyl alcohol dehydrogenase activity;oxidation-reduction process		13.3719	80	80	13.3719	contig_4205	0	564	8.18373	40	40	8.18373	contig_4205	0	564	9.22956	53	53	9.22956	contig_4205	0	564	10.2617	28.2037	140	140	28.2037	contig_4205	0	564	59.9576	265	265	59.9576
contig_20992	507.934	436.813	-462.049	-5.26981	-462.049	-5.26981	74.2331	3.50884e-06	5.36595e-05	Peroxidase superfamily	454	gi|1402912|emb|CAA66961.1|peroxidase [Arabidopsis thaliana]/gi|1032297162|gb|OAP11488.1|hypothetical protein AXX17_AT2G33920 [Arabidopsis thaliana]	80.70%	OAP11488.1;CAA66961.1	peroxidase activity;extracellular region;cytosol;response to oxidative stress;plant-type cell wall;plant-type cell wall organization;heme binding;hydrogen peroxide catabolic process;metal ion binding;rhythmic process;defense response to fungus;oxidation-reduction process		579.336	2741	2790	579.336	contig_20992	0	454	591.694	2278	2328	591.694	contig_20992	0	454	539.758	2441	2495	539.758	contig_20992	0	454	570.263	243.258	962	972	243.258	contig_20992	0	454	83.7602	291	298	83.7602
contig_128	126.659	110.158	109.576	15.6109	109.576	15.6109	175.099	1.23869e-07	5.10662e-06	Uncharacterized conserved vWA	1516	gi|1032279734|gb|OAO94062.1|hypothetical protein AXX17_AT5G12620 [Arabidopsis thaliana]	68.90%	OAO94062.1	nucleus;chloroplast		8.51929	137	137	8.51929	contig_128	0	1516	13.7007	180	180	13.7007	contig_128	0	1516	10.4954	162	162	10.4954	contig_128	0	1516	10.9051	7.04507	94	94	7.04507	contig_128	0	1516	7.32314	87	87	7.32314
contig_6965	1577.19	1429.53	-1478.43	-13.7426	-1478.43	-13.7426	953.586	1.48662e-10	8.24449e-08	Peroxidase superfamily	1214	gi|7269041|emb|CAB79151.1|peroxidase prxr1 [Arabidopsis thaliana]/gi|2894574|emb|CAA17163.1|peroxidase prxr1 [Arabidopsis thaliana]	76.70%	CAA17163.1;CAB79151.1	peroxidase activity;extracellular region;cytosol;response to oxidative stress;plant-type cell wall;plant-type cell wall organization;heme binding;hydrogen peroxide catabolic process;metal ion binding;rhythmic process;defense response to fungus;oxidation-reduction process		1650.38	21240	21253	1650.38	contig_6965	0	1214	1563.86	16447	16453	1563.86	contig_6965	0	1214	1569.12	19379	19395	1569.12	contig_6965	0	1214	1594.45	254.383	2718	2718	254.383	contig_6965	0	1214	158.301	1505	1506	158.301
contig_23297	255.865	117.81	215.925	11.0873	215.925	11.0873	35.5805	5.6508e-05	0.000414202	Major facilitator superfamily	684	gi|1032301182|gb|OAP15507.1|hypothetical protein AXX17_AT1G52830 [Arabidopsis thaliana]	75.90%	OAP15507.1	plasma membrane;response to wounding;response to nematode;response to abscisic acid;response to salicylic acid;response to jasmonic acid;integral component of membrane;hyperosmotic salinity response;defense response to bacterium;dipeptide transporter activity;tripeptide transporter activity;dipeptide transport;tripeptide transport;response to leucine;response to histidine;response to phenylalanine		22.8788	166	166	22.8788	contig_23297	0	684	18.2196	108	108	18.2196	contig_23297	0	684	23.1182	161	161	23.1182	contig_23297	0	684	21.4055	274.085	1650	1650	274.085	contig_23297	0	684	213.053	1142	1142	213.053
contig_1028	129.463	105.92	113.678	61.2342	113.678	61.2342	172.77	1.30567e-07	5.2516e-06	S-adenosyl-L-methionine-dependent methyltransferases superfamily	670	gi|15230529|ref|NP_190072.1|farnesoic acid carboxyl-O-methyltransferase [Arabidopsis thaliana]/gi|332644441|gb|AEE77962.1|farnesoic acid carboxyl-O-methyltransferase [Arabidopsis thaliana]/gi|9798389|emb|CAC03536.1|AtPP-like protein [Arabidopsis thaliana]/gi|23297338|gb|AAN12945.1|putative AtPP protein [Arabidopsis thaliana]	68.80%	NP_190072.1;AEE77962.1;AAN12945.1;CAC03536.1	chloroplast;farnesoic acid O-methyltransferase activity;methylation	FAMT	3.65831	26	26	3.65831	contig_1028	0	670	2.23892	13	13	2.23892	contig_1028	0	670	1.02614	7	7	1.02614	contig_1028	0	670	2.30779	2.71333	16	16	2.71333	contig_1028	0	670	2.28551	12	12	2.28551
contig_3283	249.113	228.267	235.342	34.748	235.342	34.748	1371.57	3.48653e-11	3.67289e-08	cyclic nucleotide gated channel 10	865	gi|1032278440|gb|OAO92768.1|CNGC1 [Arabidopsis thaliana]	51.20%	OAO92768.1	voltage-gated potassium channel activity;binding;plasma membrane;ligand-gated ion channel activity;metal ion transport		7.30198	67	67	7.30198	contig_3283	0	865	9.87156	74	74	9.87156	contig_3283	0	865	3.74699	33	33	3.74699	contig_3283	0	865	6.97351	6.04225	46	46	6.04225	contig_3283	0	865	7.96627	54	54	7.96627
contig_3513	111.38	59.081	88.0429	4.30095	88.0429	4.30095	38.1426	4.3679e-05	0.000343977	S-adenosyl-L-methionine-dependent methyltransferases superfamily	391	gi|3894186|gb|AAC78535.1|putative embryo-abundant protein [Arabidopsis thaliana]/gi|15227331|ref|NP_181669.1|S-adenosyl-L-methionine-dependent methyltransferases superfamily protein [Arabidopsis thaliana]/gi|18252865|gb|AAL62359.1|putative embryo-abundant protein [Arabidopsis thaliana]/gi|30023764|gb|AAP13415.1|At2g41380 [Arabidopsis thaliana]/gi|1032294803|gb|OAP09129.1|hypothetical protein AXX1…	63.50%	AAP13415.1;NP_181669.1;AAC78535.1;AAL62359.1;OAP09129.1;AEC09967.1	nucleus;mitochondrion;cytosol;response to salt stress;pollen germination;pollen exine formation;response to cadmium ion	AT2G41380	31.3436	119	130	31.3436	contig_3513	0	391	21.5435	68	73	21.5435	contig_3513	0	391	27.1288	94	108	27.1288	contig_3513	0	391	26.672	53.1779	173	183	53.1779	contig_3513	0	391	56.4608	168	173	56.4608
contig_6956	136.848	64.6229	102.476	9.4173	102.476	9.4173	20.9668	0.000380455	0.00178598	Avr9 Cf-9 rapidly elicited	331	gi|332194638|gb|AEE32759.1|Avr9/Cf-9 rapidly elicited protein [Arabidopsis thaliana]/gi|4220461|gb|AAD12688.1|ESTs gb|T75642 and gb|AA650997 come from this gene [Arabidopsis thaliana]/gi|18403871|ref|NP_564601.1|Avr9/Cf-9 rapidly elicited protein [Arabidopsis thaliana]/gi|28393418|gb|AAO42131.1|unknown protein [Arabidopsis thaliana]/gi|28973121|gb|AAO63885.1|unknown protein [Arabidopsis thaliana]	57.80%	AAD12688.1;NP_564601.1;AAO63885.1;AAO42131.1;AEE32759.1	vacuole;response to chitin	AT1G52140	89.9997	315	316	89.9997	contig_6956	0	331	78.7863	226	226	78.7863	contig_6956	0	331	114.536	384	386	114.536	contig_6956	0	331	94.4408	8.92487	26	26	8.92487	contig_6956	0	331	16.1919	42	42	16.1919
contig_175	108.098	83.1551	99.9858	8.00429	99.9858	8.00429	232.639	4.04081e-08	2.46246e-06	phosphatidylglycerol specific phospholipase C	1832	gi|75100037|sp|O81020.1|NPC2_ARATHRecName: Full=Non-specific phospholipase C2 Flags: Precursor/gi|24417129|dbj|BAC22507.1|phosphatidylglycerol specific phospholipase C [Arabidopsis thaliana]/gi|15225806|ref|NP_180255.1|non-specific phospholipase C2 [Arabidopsis thaliana]/gi|330252808|gb|AEC07902.1|non-specific phospholipase C2 [Arabidopsis thaliana]/gi|3426039|gb|AAC32238.1|putative phospholipase…	76.80%	O81020.1;BAC22507.1;OAP10491.1;AAC32238.1;AEC07902.1;NP_180255.1	acid phosphatase activity;phospholipase C activity;extracellular region;vacuole;plasma membrane;phospholipid catabolic process;plasmodesma;cellular response to phosphate starvation;lysophosphatidic acid phosphatase activity	NPC2	12.1956	237	237	12.1956	contig_175	0	1832	15.2426	242	242	15.2426	contig_175	0	1832	15.3865	287	287	15.3865	contig_175	0	1832	14.2749	34.173	551	551	34.173	contig_175	0	1832	22.4986	323	323	22.4986
contig_3236	142.271	52.7436	113.496	17.54	113.496	17.54	28.7132	0.0001239	0.000753522	heat shock factor 6	582	"gi|30697614|ref|NP_201008.2|heat shock transcription factor B2A [Arabidopsis thaliana]/gi|225879152|dbj|BAH30646.1|hypothetical protein, partial [Arabidopsis thaliana]/gi|11386851|sp|Q9SCW4.1|HFB2A_ARATHRecName: Full=Heat stress transcription factor B-2a Short=AtHsfB2a AltName: Full=AtHsf-22 AltName: Full=Heat shock factor protein 6 Short=HSF 6 AltName: Full=Heat shock transcription factor 6 Sho…	55.20%	BAF01530.1;NP_201008.2;AAP40470.1;Q9SCW4.1;CAB63802.1;AAP40369.1;OAO90897.1;BAB10163.1;BAH30646.1;AED97552.1	"DNA binding;protein binding;nucleus;regulation of transcription, DNA-templated;response to heat"	HSFB2A	7.28906	45	45	7.28906	contig_3236	0	582	11.1029	56	56	11.1029	contig_3236	0	582	2.19384	13	13	2.19384	contig_3236	0	582	6.86192	66.7667	342	342	66.7667	contig_3236	0	582	59.6381	272	272	59.6381
contig_5325	182.318	74.5922	147.587	4.25592	147.587	4.25592	33.1109	7.36503e-05	0.000506817	Ca2+-dependent membrane-binding annexin	951	gi|613404537|emb|CDJ79777.1|annexin D8 [Arabidopsis thaliana]/gi|22326753|ref|NP_568271.2|annexin 8 [Arabidopsis thaliana]/gi|294956516|sp|Q94CK4.2|ANXD8_ARATHRecName: Full=Annexin D8 AltName: Full=AnnAt8/gi|332004420|gb|AED91803.1|annexin 8 [Arabidopsis thaliana]	68.10%	NP_568271.2;Q94CK4.2;AED91803.1;CDJ79777.1	peroxidase activity;copper ion binding;calcium ion binding;ATP binding;calcium-dependent phospholipid binding;cell wall;nucleus;mitochondrion;vacuolar membrane;cytosol;plasma membrane;response to oxidative stress;zinc ion binding;response to heat;response to cold;response to water deprivation;plasmodesma;chloroplast stroma;thylakoid;response to red or far red light;response to salt stress;respons…	ANNAT8	38.9578	393	393	38.9578	contig_5325	0	951	46.8357	386	386	46.8357	contig_5325	0	951	50.1926	486	486	50.1926	contig_5325	0	951	45.3287	154.72	1295	1295	154.72	contig_5325	0	951	202.75	1511	1511	202.75
contig_5593	131.712	62.5263	106.266	4.0621	106.266	4.0621	20.4332	0.000416363	0.00191519	NADH-dependent glutamate synthase 1	986	"gi|110741260|dbj|BAF02180.1|NADH-dependent glutamate synthase, partial [Arabidopsis thaliana]"	82.80%	BAF02180.1	"iron ion binding;protein binding;mitochondrion;cytosol;response to light stimulus;chloroplast stroma;response to cytokinin;response to sucrose;photorespiration;chloroplast envelope;FMN binding;membrane;glutamate synthase (NADH) activity;glutamate synthase (ferredoxin) activity;ammonia assimilation cycle;nitrate assimilation;response to cadmium ion;apoplast;developmental growth;flavin adenine din…		35.6627	345	373	35.6627	contig_5593	0	986	35.5768	261	304	35.5768	contig_5593	0	986	32.8716	297	330	32.8716	contig_5593	0	986	34.7037	71.5602	557	621	71.5602	contig_5593	0	986	75.4517	511	583	75.4517
contig_1303	127.413	66.7322	87.3225	4.35767	87.3225	4.35767	18.708	0.000565609	0.00244094	2-oxoglutarate (2OG) and Fe(II)-dependent oxygenase superfamily	691	gi|11994563|dbj|BAB02603.1|leucoanthocyanidin dioxygenase-like protein [Arabidopsis thaliana]/gi|332641861|gb|AEE75382.1|2-oxoglutarate (2OG) and Fe(II)-dependent oxygenase superfamily protein [Arabidopsis thaliana]/gi|62320500|dbj|BAD95049.1|hypothetical protein [Arabidopsis thaliana]/gi|1032287403|gb|OAP01730.1|F6'H1 [Arabidopsis thaliana]/gi|75311178|sp|Q9LHN8.1|F6H1_ARATHRecName: Full=Feruloy…	62.60%	NP_187970.1;BAD95049.1;OAP01730.1;AEE75382.1;Q9LHN8.1;AAS49108.1;BAB02603.1	"response to oomycetes;cytoplasm;coumarin biosynthetic process;hydrogen peroxide-mediated programmed cell death;oxidoreductase activity, acting on paired donors, with incorporation or reduction of molecular oxygen, 2-oxoglutarate as one donor, and incorporation of one atom each of oxygen into both donors;metal ion binding;oxidation-reduction process;cellular response to iron ion;cellular response…	AT3G13610	42.0199	308	308	42.0199	contig_1303	0	691	50.9322	305	305	50.9322	contig_1303	0	691	18.6199	131	131	18.6199	contig_1303	0	691	37.1906	15.2919	93	93	15.2919	contig_1303	0	691	35.0876	190	190	35.0876
contig_3401	153.886	57.3923	124.829	4.61338	124.829	4.61338	47.4571	1.92908e-05	0.000187188	receptor serine threonine kinase	752	gi|7268618|emb|CAB78827.1|receptor serine/threonine kinase-like protein [Arabidopsis thaliana]/gi|4375833|emb|CAA16797.1|receptor serine/threonine kinase-like protein [Arabidopsis thaliana]	71.50%	CAA16797.1;CAB78827.1	transmembrane receptor protein serine/threonine kinase activity;plasma membrane;glycerol metabolic process;cellular defense response;glycerophosphodiester phosphodiesterase activity;plasmodesma;response to fungus;phosphorylation		104.301	826	832	104.301	contig_3401	0	752	83.6275	544	545	83.6275	contig_3401	0	752	97.3022	743	745	97.3022	contig_3401	0	752	95.0768	40.9457	270	271	40.9457	contig_3401	0	752	38.1806	222	225	38.1806
contig_549	127.793	78.993	116.18	4.94148	116.18	4.94148	89.3434	1.71608e-06	3.20453e-05	receptor kinase 1	625	"gi|110740497|dbj|BAE98354.1|putative receptor-like protein kinase, partial [Arabidopsis thaliana]"	63.90%	BAE98354.1	protein serine/threonine kinase activity;nucleus;plasma membrane;pollen-pistil interaction;ubiquitin protein ligase binding;protein autophosphorylation;cellular response to abscisic acid stimulus		64.5574	428	428	64.5574	contig_549	0	625	58.3415	316	316	58.3415	contig_549	0	625	71.5016	455	455	71.5016	contig_549	0	625	64.8001	38.1765	210	210	38.1765	contig_549	0	625	27.155	133	133	27.155
contig_17717	158.384	49.7869	139.675	6.66328	139.675	6.66328	47.5395	1.91652e-05	0.000186416	---NA---	323						23.3491	77	80	23.3491	contig_17717	0	323	23.5783	65	66	23.5783	contig_17717	0	323	27.0627	84	89	27.0627	contig_17717	0	323	24.6634	173.421	480	493	173.421	contig_17717	0	323	181.733	449	460	181.733
contig_2064	106.072	83.6714	89.5746	5.18433	89.5746	5.18433	54.1917	1.16813e-05	0.000129047	lipoxygenase 2	1182	gi|1032297914|gb|OAP12239.1|LOX1 [Arabidopsis thaliana]	75.60%	OAP12239.1	"protein binding;response to water deprivation;chloroplast thylakoid membrane;chloroplast stroma;response to wounding;response to fungus;jasmonic acid biosynthetic process;response to abscisic acid;response to jasmonic acid;defense response to bacterium, incompatible interaction;chloroplast envelope;lateral root formation;green leaf volatile biosynthetic process;linoleate 13S-lipoxygenase activit…		36.1296	453	453	36.1296	contig_2064	0	1182	30.0679	308	308	30.0679	contig_2064	0	1182	29.5813	356	356	29.5813	contig_2064	0	1182	31.9263	23.5508	245	245	23.5508	contig_2064	0	1182	18.0292	167	167	18.0292
contig_3459	194.902	131.664	-178.442	-4.10868	-178.442	-4.10868	276.602	2.03809e-08	1.61463e-06	phosphatase 2C family	905	gi|1039018163|gb|ANM67462.1|Protein phosphatase 2C family protein [Arabidopsis thaliana]/gi|1063726632|ref|NP_001329291.1|Protein phosphatase 2C family protein [Arabidopsis thaliana]	84.00%	ANM67462.1;NP_001329291.1	protein serine/threonine phosphatase activity;plasma membrane;protein dephosphorylation;chloroplast;metal ion binding	AT4G33920	230.107	2206	2209	230.107	contig_3459	0	905	240.726	1886	1888	240.726	contig_3459	0	905	236.696	2180	2181	236.696	contig_3459	0	905	235.843	45.8248	365	365	45.8248	contig_3459	0	905	56.6833	402	402	56.6833
contig_1257	275.854	196.962	-256.518	-13.2479	-256.518	-13.2479	260.118	2.59898e-08	1.87291e-06	nudix hydrolase homolog 13	416	gi|332191578|gb|AEE29699.1|nudix hydrolase homolog 4 [Arabidopsis thaliana]/gi|68565940|sp|Q9LE73.1|NUDT4_ARATHRecName: Full=Nudix hydrolase 4 Short=AtNUDT4 AltName: Full=ADP-ribose pyrophosphatase AltName: Full=NADH pyrophosphatase/gi|27765008|gb|AAO23625.1|At1g18300 [Arabidopsis thaliana]/gi|8671772|gb|AAF78378.1|AC069551_11T10O22.27 [Arabidopsis thaliana]/gi|110742961|dbj|BAE99375.1|hypothetic…	74.30%	AAF25994.1;AAF78378.1;OAP16565.1;Q9LE73.1;AEE29699.1;NP_173266.1;AAO23625.1;BAE99375.1	NAD+ diphosphatase activity;nucleus;mitochondrion;cytosol;nucleoside catabolic process;chloroplast;bis(5'-adenosyl)-pentaphosphatase activity;metal ion binding;ADP-ribose diphosphatase activity	NUDT4	267.179	1179	1179	267.179	contig_1257	0	416	291.805	1052	1052	291.805	contig_1257	0	416	273.401	1158	1158	273.401	contig_1257	0	416	277.462	19.1188	70	70	19.1188	contig_1257	0	416	15.951	52	52	15.951
contig_560	708.472	608.436	-665.104	-22.8417	-665.104	-22.8417	166.425	1.51261e-07	5.82587e-06	xyloglucan endo- 4-beta-D-glucanase (XTR-6)	882	gi|15450689|gb|AAK96616.1|AT5g57560/MUA2_13 [Arabidopsis thaliana]/gi|38605148|sp|Q38857.1|XTH22_ARATHRecName: Full=Xyloglucan endotransglucosylase/hydrolase protein 22 Short=At-XTH22 Short=XTH-22 AltName: Full=Touch protein 4 Flags: Precursor/gi|17386136|gb|AAL38614.1|AF446881_1AT5g57560/MUA2_13 [Arabidopsis thaliana]/gi|886116|gb|AAA92363.1|TCH4 protein [Arabidopsis thaliana]/gi|15242781|ref|NP…	80.10%	AAK96616.1;AAK56251.1;AAA92363.1;AAL38614.1;NP_200564.1;AAL05902.1;AED96915.1;OAO96053.1;Q38857.1;AAC05572.1;BAB08791.1	"cell wall;Golgi apparatus;cell proliferation;response to heat;response to cold;chloroplast;response to mechanical stimulus;plant-type cell wall organization;response to brassinosteroid;plant-type cell wall biogenesis;xyloglucan metabolic process;xyloglucan:xyloglucosyl transferase activity;xyloglucan-specific endo-beta-1,4-glucanase activity;apoplast;cellular response to auxin stimulus;xylogluca…	TCH4	687.051	6428	6428	687.051	contig_560	0	882	664.215	5077	5077	664.215	contig_560	0	882	735.399	6604	6604	735.399	contig_560	0	882	695.555	55.7797	433	433	55.7797	contig_560	0	882	83.1911	575	575	83.1911
contig_10921	228.643	102.044	192.321	5.4754	192.321	5.4754	59.6146	8.12784e-06	9.8401e-05	chaperonin 20	694	"gi|18394184|ref|NP_563961.1|chaperonin 10 [Arabidopsis thaliana]/gi|21555041|gb|AAM63762.1|chaperonin CPN10 [Arabidopsis thaliana]/gi|17380944|gb|AAL36284.1|putative chaperonin CPN10 protein [Arabidopsis thaliana]/gi|11990458|dbj|BAA13588.2|mitochondrial chaperonin 10 [Arabidopsis thaliana]/gi|6899643|gb|AAF31020.1|AC012189_2Strong similarity to 10 KD chaperonin (protein CPN10) from Arabidopsis …	76.50%	AAF31020.1;P34893.1;AAM63762.1;AAM14191.1;AAA32767.1;NP_563961.1;BAA13588.2;AAL36284.1;AEE29249.1	copper ion binding;ATP binding;mitochondrial matrix;response to unfolded protein;response to heat;response to cold;chloroplast thylakoid membrane;chloroplast stroma;chloroplast envelope;response to cadmium ion;apoplast;unfolded protein binding;chaperone mediated protein folding requiring cofactor;chaperone binding;positive regulation of superoxide dismutase activity	CPN10	44.555	328	328	44.555	contig_10921	0	694	42.8974	258	258	42.8974	contig_10921	0	694	41.466	293	293	41.466	contig_10921	0	694	42.9728	228.878	1398	1398	228.878	contig_10921	0	694	270.109	1469	1469	270.109
contig_7496	149.78	98.4372	99.7526	5.85251	99.7526	5.85251	12.1506	0.00238825	0.00768941	---NA---	487						16.2604	84	84	16.2604	contig_7496	0	487	19.1923	81	81	19.1923	contig_7496	0	487	26.2179	130	130	26.2179	contig_7496	0	487	20.5569	25.4305	109	109	25.4305	contig_7496	0	487	26.4649	101	101	26.4649
contig_10119	212.337	159.531	191.456	78.5686	191.456	78.5686	111.967	7.13908e-07	1.71381e-05	Peroxidase superfamily	372	gi|1032288974|gb|OAP03301.1|hypothetical protein AXX17_AT3G23360 [Arabidopsis thaliana]	70.40%	OAP03301.1	"peroxidase activity;binding;extracellular region;nucleus;endoplasmic reticulum;metabolic process;response to desiccation;response to cold;plant-type cell wall;plasmodesma;plant-type cell wall organization;transferase activity, transferring glycosyl groups;hyperosmotic salinity response"		4.81496	19	19	4.81496	contig_10119	0	372	4.34266	14	14	4.34266	contig_10119	0	372	6.07252	23	23	6.07252	contig_10119	0	372	5.07671	2.74888	9	9	2.74888	contig_10119	0	372	1.37213	4	4	1.37213
contig_31656	112.295	92.4559	101.437	10.7633	101.437	10.7633	112.919	6.90742e-07	1.68148e-05	Leucine-rich repeat (LRR) family	825	gi|1032288582|gb|OAP02909.1|FTM4 [Arabidopsis thaliana]/gi|21554067|gb|AAM63148.1|leucine-rich repeat protein FLR1 [Arabidopsis thaliana]/gi|240255328|ref|NP_974291.4|Leucine-rich repeat (LRR) family protein [Arabidopsis thaliana]/gi|332641637|gb|AEE75158.1|Leucine-rich repeat (LRR) family protein [Arabidopsis thaliana]/gi|9294113|dbj|BAB01964.1|leucine-rich repeat protein FLR1 [Arabidopsis thali…	64.20%	NP_974291.4;AEE75158.1;BAB01964.1;AAN65059.1;OAP02909.1;AAM63148.1;AAL24284.1	extracellular region;Golgi apparatus;cytosol;defense response;signal transduction;transcription factor binding;plant-type cell wall;plasmodesma;vegetative to reproductive phase transition of meristem;polygalacturonase inhibitor activity	FLR1	12.4553	109	109	12.4553	contig_31656	0	825	8.95151	64	64	8.95151	contig_31656	0	825	9.76212	82	82	9.76212	contig_31656	0	825	10.3896	43.1069	313	313	43.1069	contig_31656	0	825	26.4496	171	171	26.4496
contig_167	201.293	83.5361	147.904	7.67185	147.904	7.67185	8.23453	0.00790057	0.020302	glutathione transferase lambda 1	983	gi|15241956|ref|NP_195899.1|Glutathione S-transferase family protein [Arabidopsis thaliana]/gi|25084108|gb|AAN72177.1|unknown protein [Arabidopsis thaliana]/gi|110742581|dbj|BAE99204.1|hypothetical protein [Arabidopsis thaliana]/gi|332003135|gb|AED90518.1|Glutathione S-transferase family protein [Arabidopsis thaliana]/gi|7413554|emb|CAB86033.1|putative protein [Arabidopsis thaliana]/gi|75335686|s…	76.50%	Q9LZ06.1;AAM98210.1;CAB86033.1;BAE99204.1;AAN72177.1;AED90518.1;NP_195899.1	glutathione transferase activity;cytosol;glutathione metabolic process;chloroplast stroma;response to toxic substance;protein glutathionylation;response to cadmium ion	GSTL3	22.8247	238	238	22.8247	contig_167	0	983	21.599	184	184	21.599	contig_167	0	983	22.0812	221	221	22.0812	contig_167	0	983	22.1683	111.887	968	968	111.887	contig_167	0	983	222.892	1717	1717	222.892
contig_7176	389.35	293.21	-341.807	-6.70853	-341.807	-6.70853	147.124	2.45429e-07	8.16298e-06	Mitochondrial import inner membrane translocase subunit Tim17 Tim22 Tim23 family	675	"gi|75216895|sp|Q9ZV24.1|OP161_ARATHRecName: Full=Outer envelope pore protein 16-1, chloroplastic AltName: Full=Chloroplastic outer envelope pore protein of 16 kDa 1 Short=AtOEP16-1 Short=OEP16-1 AltName: Full=Outer plastid envelope protein 16-L Short=AtOEP16-L Short=Leave outer plastid envelope protein 16 AltName: Full=Protochlorophyllide-dependent translocon protein 16 Short=Ptc16/gi|15010584|g…	59.25%	Q9ZV24.1;OAP07323.1;AEC08186.1;NP_180456.1;AAK73951.1;AAM10398.1;AAC79594.1;ABD48954.1	protein binding;mitochondrial inner membrane presequence translocase complex;vacuole;response to cold;response to wounding;chloroplast outer membrane;response to sucrose;response to glucose;response to jasmonic acid;amino acid transmembrane transporter activity;protein channel activity;P-P-bond-hydrolysis-driven protein transmembrane transporter activity;protein import into mitochondrial matrix;i…	OEP16-1	432.813	3099	3099	432.813	contig_7176	0	675	363.95	2129	2129	363.95	contig_7176	0	675	408.289	2806	2806	408.289	contig_7176	0	675	401.684	83.8267	498	498	83.8267	contig_7176	0	675	67.1123	355	355	67.1123
contig_1988	101.088	29.9627	89.8707	4.09189	89.8707	4.09189	55.3198	1.08025e-05	0.000121923	cellulose synthase catalytic subunit	496	gi|62320966|dbj|BAD93994.1|putative cellulose synthase catalytic subunit [Arabidopsis thaliana]	60.80%	BAD93994.1	polysaccharide biosynthetic process;endoplasmic reticulum;Golgi apparatus;plasma membrane;plant-type cell wall biogenesis;cellulose synthase activity;single-organism cellular process		31.5507	165	166	31.5507	contig_1988	0	496	29.3129	126	126	29.3129	contig_1988	0	496	26.3363	133	133	26.3363	contig_1988	0	496	29.0666	95.2946	416	416	95.2946	contig_1988	0	496	86.1868	335	335	86.1868
contig_13692	124.492	51.302	108.855	380.292	108.855	380.292	39.0732	3.99366e-05	0.000321761	AT5g25460 F18G18_200	925	gi|1032295669|gb|OAP09995.1|hypothetical protein AXX17_AT2G39080 [Arabidopsis thaliana]	73.30%	OAP09995.1	extracellular region;plasma membrane;plant-type cell wall;plasmodesma;chloroplast;root morphogenesis;response to karrikin		0.611493	6	6	0.611493	contig_13692	0	925	0.249493	2	2	0.249493	contig_13692	0	925	0	0	0	0	contig_13692	0	925	0.286995	99.7404	812	812	99.7404	contig_13692	0	925	101.672	737	737	101.672
contig_3621	126.834	86.495	104.583	107.49	104.583	107.49	62.8289	6.65173e-06	8.53076e-05	glutathione S-transferase	341	gi|332641224|gb|AEE74745.1|glutathione S-transferase TAU 8 [Arabidopsis thaliana]/gi|21554248|gb|AAM63323.1|putative glutathione transferase [Arabidopsis thaliana]/gi|89111910|gb|ABD60727.1|At3g09270 [Arabidopsis thaliana]/gi|15232628|ref|NP_187538.1|glutathione S-transferase TAU 8 [Arabidopsis thaliana]/gi|75337546|sp|Q9SR36.1|GSTU8_ARATHRecName: Full=Glutathione S-transferase U8 Short=AtGSTU8 A…	58.70%	NP_187538.1;AAM63323.1;ABD60727.1;AAF14025.1;Q9SR36.1;AEE74745.1	glutathione transferase activity;cytosol;plasma membrane;response to oxidative stress;toxin catabolic process;plasmodesma;response to salicylic acid;glutathione binding;response to cadmium ion	GSTU8	0.829371	3	3	0.829371	contig_3621	0	341	0.676777	2	2	0.676777	contig_3621	0	341	1.44012	5	5	1.44012	contig_3621	0	341	0.982091	4.33157	13	13	4.33157	contig_3621	0	341	11.9749	32	32	11.9749
contig_26674	118.49	73.4056	85.4915	5.42887	85.4915	5.42887	14.1135	0.00146627	0.00521342	MATE efflux family	369	gi|75333843|sp|Q9FHB6.1|DTX16_ARATHRecName: Full=Protein DETOXIFICATION 16 Short=AtDTX16 AltName: Full=Multidrug and toxic compound extrusion protein 16 Short=MATE protein 16/gi|332008832|gb|AED96215.1|MATE efflux family protein [Arabidopsis thaliana]/gi|15028279|gb|AAK76728.1|unknown protein [Arabidopsis thaliana]/gi|10177411|dbj|BAB10542.1|unnamed protein product [Arabidopsis thaliana]/gi|10322…	74.90%	NP_200058.1;OAO95306.1;AAL85047.1;AED96215.1;Q9FHB6.1;BAB10542.1;AAK76728.1	vacuolar membrane;plasma membrane;response to nematode;antiporter activity;integral component of membrane	AT5G52450	22.7377	64	89	22.7377	contig_26674	0	369	18.1373	37	58	18.1373	contig_26674	0	369	17.0348	46	64	17.0348	contig_26674	0	369	19.3033	35.4102	59	115	35.4102	contig_26674	0	369	30.0864	42	87	30.0864
contig_23016	688.412	417.534	565.859	10.42	565.859	10.42	52.3569	1.33104e-05	0.000142019	beta-galactosidase 3	2965	gi|4006924|emb|CAB16852.1|beta-galactosidase like protein [Arabidopsis thaliana]/gi|7270584|emb|CAB80302.1|beta-galactosidase like protein [Arabidopsis thaliana]	85.50%	CAB16852.1;CAB80302.1	beta-galactosidase activity;vacuole;cytosol;carbohydrate metabolic process;plant-type cell wall;plasmodesma;carbohydrate binding;apoplast		54.9416	1728	1728	54.9416	contig_23016	0	2965	64.0194	1645	1645	64.0194	contig_23016	0	2965	61.2486	1849	1849	61.2486	contig_23016	0	2965	60.0699	497.554	12984	12984	497.554	contig_23016	0	2965	743.354	17272	17272	743.354
contig_27688	122.867	34.1331	112.455	5.92504	112.455	5.92504	206.48	6.47066e-08	3.36215e-06	---NA---	418						18.7191	83	83	18.7191	contig_27688	0	418	23.4646	85	85	23.4646	contig_27688	0	418	26.3164	111	112	26.3164	contig_27688	0	418	22.8333	105.466	388	388	105.466	contig_27688	0	418	102.269	333	335	102.269
contig_2056	390.841	244.155	-335.431	-11.661	-335.431	-11.661	93.7102	1.42634e-06	2.8048e-05	Heavy metal transport detoxification superfamily	359	gi|1032281057|gb|OAO95385.1|hypothetical protein AXX17_AT5G51610 [Arabidopsis thaliana]	63.43%	OAO95385.1			416.477	1586	1586	416.477	contig_2056	0	359	336.208	1046	1046	336.208	contig_2056	0	359	347.998	1272	1272	347.998	contig_2056	0	359	366.894	25.6358	81	81	25.6358	contig_2056	0	359	31.6354	89	89	31.6354
contig_17433	264.413	194.864	224.198	11.0193	224.198	11.0193	112.844	6.92531e-07	1.68358e-05	acidic endochitinase	334	gi|2342459|dbj|BAA21873.1|acidic endochitinase [Arabidopsis thaliana]	73.90%	BAA21873.1	chitinase activity;extracellular region;chitin catabolic process;chitin binding;response to cold;response to wounding;response to light intensity;response to salt stress;cellular response to water deprivation		21.4511	76	76	21.4511	contig_17433	0	334	28.3294	82	82	28.3294	contig_17433	0	334	17.3496	59	59	17.3496	contig_17433	0	334	22.3767	36.3994	107	107	36.3994	contig_17433	0	334	23.3056	61	61	23.3056
contig_4597	1082.65	915.095	-989.42	-10.7288	-989.42	-10.7288	197.817	7.66197e-08	3.75044e-06	polygalacturonase 2	1120	gi|15222103|ref|NP_175357.1|unknown seed protein like 1 [Arabidopsis thaliana]/gi|75215674|sp|Q9XI99.1|USPL1_ARATHRecName: Full=BURP domain protein USPL1 AltName: Full=Unknown seed protein-like protein 1 Short=AtUSPL1 Flags: Precursor/gi|1032303851|gb|OAP18176.1|USPL1 [Arabidopsis thaliana]/gi|332194296|gb|AEE32417.1|unknown seed protein like 1 [Arabidopsis thaliana]/gi|5430766|gb|AAD43166.1|AC00…	44.90%	Q9XI99.1;AEE32417.1;BAE99695.1;AAP21236.1;NP_175357.1;OAP18176.1;AAD43166.1	Golgi apparatus;response to stimulus	USPL1	1169.98	13893	13900	1169.98	contig_4597	0	1120	1022.65	9926	9926	1022.65	contig_4597	0	1120	1080.73	12314	12324	1080.73	contig_4597	0	1120	1091.12	409.744	4037	4039	409.744	contig_4597	0	1120	326.198	2860	2863	326.198
contig_1841	100.631	80.437	87.2919	7.06962	87.2919	7.06962	74.7238	3.42101e-06	5.27158e-05	PLAT LH2 domain-containing lipoxygenase family	949	"gi|9857526|gb|AAG00881.1|AC064840_12lipoxygenase - partial coding sequence, partial [Arabidopsis thaliana]"	68.60%	AAG00881.1	"chloroplast;pollen development;response to wounding;jasmonic acid biosynthetic process;response to abscisic acid;response to jasmonic acid;defense response to bacterium, incompatible interaction;anther dehiscence;response to ozone;lateral root formation;linoleate 13S-lipoxygenase activity;membrane disassembly;lipid oxidation;growth;stamen filament development;negative regulation of defense respo…		25.2319	254	254	25.2319	contig_1841	0	949	26.3854	217	217	26.3854	contig_1841	0	949	19.25	186	186	19.25	contig_1841	0	949	23.6224	14.4869	121	121	14.4869	contig_1841	0	949	13.4466	100	100	13.4466
contig_10590	754.418	424.266	621.112	15.4672	621.112	15.4672	43.875	2.59068e-05	0.000233309	---NA---	578						39.7964	221	244	39.7964	contig_10590	0	578	51.1072	225	256	51.1072	contig_10590	0	578	37.8932	187	223	37.8932	contig_10590	0	578	42.9323	689.389	3201	3507	689.389	contig_10590	0	578	510.432	2098	2312	510.432
contig_2058	94.9791	68.3262	87.1981	7.13756	87.1981	7.13756	67.4726	5.06317e-06	6.98786e-05	MYB transcription factor	887	gi|1032296050|gb|OAP10376.1|MYB14AT [Arabidopsis thaliana]	75.70%	OAP10376.1	"RNA polymerase II transcription factor activity, sequence-specific DNA binding;transcription factor activity, RNA polymerase II transcription factor recruiting;nucleus;regulation of transcription from RNA polymerase II promoter;response to UV;response to salt stress;response to ethylene;response to auxin;response to gibberellin;response to salicylic acid;response to jasmonic acid;lignin biosynth…		14.9857	135	141	14.9857	contig_2058	0	887	14.5702	108	112	14.5702	contig_2058	0	887	13.066	115	118	13.066	contig_2058	0	887	14.2073	28.9495	220	226	28.9495	contig_2058	0	887	29.9238	201	208	29.9238
contig_23184	339.842	223.41	262.501	4.71612	262.501	4.71612	41.9221	3.072e-05	0.000264271	senescence-associated family (DUF581)	596	gi|1063736620|ref|NP_001330022.1|hypothetical protein (DUF581) [Arabidopsis thaliana]/gi|15238001|ref|NP_199517.1|hypothetical protein (DUF581) [Arabidopsis thaliana]/gi|332008079|gb|AED95462.1|hypothetical protein (DUF581) [Arabidopsis thaliana]/gi|10257481|dbj|BAB10580.1|unnamed protein product [Arabidopsis thaliana]/gi|1032275557|gb|OAO89885.1|hypothetical protein AXX17_AT5G45540 [Arabidopsis …	77.90%	ANM68253.1;NP_199517.1;BAB10580.1;OAO89885.1;AED95462.1;NP_001330022.1	nucleus	AT5G47060	64.6933	398	409	64.6933	contig_23184	0	596	67.9565	341	351	67.9565	contig_23184	0	596	79.2653	465	481	79.2653	contig_23184	0	596	70.6384	404.535	2044	2122	404.535	contig_23184	0	596	285.405	1262	1333	285.405
contig_4647	590.342	498.836	-535.997	-6.9868	-535.997	-6.9868	451.947	2.9066e-09	4.83649e-07	plasma-membrane associated cation-binding 1	605	gi|332658895|gb|AEE84295.1|plasma-membrane associated cation-binding protein 1 [Arabidopsis thaliana]/gi|334186727|ref|NP_001190778.1|plasma-membrane associated cation-binding protein 1 [Arabidopsis thaliana]	74.13%	AEE84295.1;NP_001190778.1	"copper ion binding;calcium ion binding;calmodulin binding;phosphatidylinositol-4,5-bisphosphate binding;phosphatidylinositol-3,4,5-trisphosphate binding;vacuole;cytoplasmic microtubule;N-terminal protein myristoylation;microtubule binding;response to cold;response to water deprivation;plasmodesma;chloroplast;response to cytokinin;cellular response to magnesium starvation;negative regulation of m…	PCAP1	588.848	3779	3779	588.848	contig_4647	0	605	665.641	3490	3490	665.641	contig_4647	0	605	622.092	3832	3832	622.092	contig_4647	0	605	625.527	94.8403	505	505	94.8403	contig_4647	0	605	75.2992	357	357	75.2992
contig_6741	201.629	111.494	165.695	10.5014	165.695	10.5014	44.5903	2.43824e-05	0.00022256	FAD NAD(P)-binding oxidoreductase family	442	gi|3426064|emb|CAA07575.1|monooxygenase [Arabidopsis thaliana]/gi|332661544|gb|AEE86944.1|FAD/NAD(P)-binding oxidoreductase family protein [Arabidopsis thaliana]/gi|7270837|emb|CAB80518.1|monooxygenase 2 (MO2) [Arabidopsis thaliana]/gi|15233923|ref|NP_195566.1|FAD/NAD(P)-binding oxidoreductase family protein [Arabidopsis thaliana]/gi|4467141|emb|CAB37510.1|monooxygenase 2 (MO2) [Arabidopsis thali…	61.90%	NP_195566.1;AEE86944.1;CAA07575.1;CAB80518.1;CAB37510.1	oxidoreductase activity;intracellular membrane-bounded organelle;cytoplasmic part;single-organism metabolic process;defense response to fungus	AT4G38540	54.6009	256	256	54.6009	contig_6741	0	442	52.2129	200	200	52.2129	contig_6741	0	442	47.9972	216	216	47.9972	contig_6741	0	442	51.6037	19.2795	75	75	19.2795	contig_6741	0	442	16.4562	57	57	16.4562
contig_6981	119.503	97.2236	110.883	15.3491	110.883	15.3491	405.237	4.48339e-09	6.07295e-07	Zinc finger (C3HC4-type RING finger) family	425	gi|1032276501|gb|OAO90829.1|hypothetical protein AXX17_AT5G60170 [Arabidopsis thaliana]	53.90%	OAO90829.1	plasma membrane		17.3017	65	78	17.3017	contig_6981	0	425	15.4759	50	57	15.4759	contig_6981	0	425	15.2524	56	66	15.2524	contig_6981	0	425	16.01	8.55496	26	32	8.55496	contig_6981	0	425	6.00508	15	20	6.00508
contig_1025	112.775	84.5197	96.6453	31.3983	96.6453	31.3983	72.8889	3.76434e-06	5.64196e-05	UDP-galactose transporter 2	1469	gi|75173863|sp|Q9LDX3.1|UTR4_ARATHRecName: Full=UDP-galactose/UDP-glucose transporter 4 Short=AtUTr4/gi|60547555|gb|AAX23741.1|hypothetical protein At1g12600 [Arabidopsis thaliana]/gi|9502390|gb|AAF88097.1|AC025417_25T12C24.13 [Arabidopsis thaliana]/gi|15222026|ref|NP_172720.1|UDP-N-acetylglucosamine (UAA) transporter family [Arabidopsis thaliana]/gi|55978703|gb|AAV68813.1|hypothetical protein AT…	72.50%	AAF79647.1;NP_172720.1;AAV68813.1;AAX23741.1;Q9LDX3.1;AAF88097.1;AEE28900.1	UDP-galactose transmembrane transporter activity;plasma membrane;integral component of Golgi membrane;integral component of endoplasmic reticulum membrane;3'-phosphoadenosine 5'-phosphosulfate transmembrane transporter activity;UDP-galactose transmembrane transport	AT1G12600	2.37444	37	37	2.37444	contig_1025	0	1469	4.55592	58	58	4.55592	contig_1025	0	1469	2.60752	39	39	2.60752	contig_1025	0	1469	3.17929	5.80091	75	75	5.80091	contig_1025	0	1469	8.68672	100	100	8.68672
contig_3224	107.312	56.5448	87.8819	6.24341	87.8819	6.24341	31.744	8.59601e-05	0.000572752	multidrug resistance-associated 6	600	gi|7529757|emb|CAB86942.1|ABC transporter-like protein [Arabidopsis thaliana]	59.90%	CAB86942.1	"vacuolar membrane;plasma membrane;ATPase activity, coupled to transmembrane movement of substances"		20.4256	130	130	20.4256	contig_3224	0	600	16.9239	88	88	16.9239	contig_3224	0	600	12.9318	79	79	12.9318	contig_3224	0	600	16.7604	48.6675	255	257	48.6675	contig_3224	0	600	61.0391	287	287	61.0391
contig_4589	155.236	56.1741	-131.683	-5.62957	-131.683	-5.62957	28.5566	0.000126381	0.000765151	soluble N-ethylmaleimide-sensitive factor adaptor 33	301	gi|21553460|gb|AAM62553.1|snap25a [Arabidopsis thaliana]	63.00%	AAM62553.1	cytokinesis by cell plate formation;SNAP receptor activity;plasma membrane;cell plate;chloroplast;response to mechanical stimulus;response to abscisic acid;integral component of membrane;vesicle-mediated transport;response to other organism;membrane fusion		174.45	557	557	174.45	contig_4589	0	301	128.425	335	335	128.425	contig_4589	0	301	177.507	544	544	177.507	contig_4589	0	301	160.127	22.2711	59	59	22.2711	contig_4589	0	301	33.9157	80	80	33.9157
contig_615	122.555	70.1773	111.165	22.431	111.165	22.431	126.961	4.37096e-07	1.24512e-05	golgin 6	2886	gi|1032291972|gb|OAP06299.1|MAG4 [Arabidopsis thaliana]	61.20%	OAP06299.1	Golgi stack;cytosol;post-embryonic development;protein exit from endoplasmic reticulum;single-organism cellular process;Golgi vesicle transport;membrane fusion;bounding membrane of organelle		6.89236	211	211	6.89236	contig_615	0	2886	5.19777	130	130	5.19777	contig_615	0	2886	3.47127	102	102	3.47127	contig_615	0	2886	5.18713	37.3617	949	949	37.3617	contig_615	0	2886	42.1822	954	954	42.1822
contig_2373	167.05	95.8289	-149.7	-4.74423	-149.7	-4.74423	78.6115	2.81386e-06	4.55596e-05	cysteine-rich RLK (RECEPTOR kinase) 10	726	gi|1063724368|ref|NP_001328630.1|cysteine-rich RLK (RECEPTOR-like protein kinase) 10 [Arabidopsis thaliana]/gi|1039017380|gb|ANM66753.1|cysteine-rich RLK (RECEPTOR-like protein kinase) 10 [Arabidopsis thaliana]	52.50%	NP_001328630.1;ANM66753.1	extracellular region;cellular process;membrane;defense response to other organism	CRK10	195.426	1441	1505	195.426	contig_2373	0	726	172.45	1057	1085	172.45	contig_2373	0	726	201.168	1431	1487	201.168	contig_2373	0	726	189.681	34.1175	209	218	34.1175	contig_2373	0	726	47.2817	253	269	47.2817
contig_17	128.494	95.8059	111.249	19.9478	111.249	19.9478	45.3616	2.28621e-05	0.000211608	GDSL-like Lipase Acylhydrolase superfamily	801	gi|7573470|emb|CAB87784.1|early nodule-specific protein-like [Arabidopsis thaliana]/gi|26451820|dbj|BAC43003.1|putative early nodule-specific protein [Arabidopsis thaliana]/gi|15241404|ref|NP_196949.1|GDSL-like Lipase/Acylhydrolase superfamily protein [Arabidopsis thaliana]/gi|28950957|gb|AAO63402.1|At5g14450 [Arabidopsis thaliana]/gi|75181027|sp|Q9LY84.1|GDL76_ARATHRecName: Full=GDSL esterase/li…	58.30%	AAO63402.1;CAB87784.1;AED92036.1;NP_196949.1;Q9LY84.1;BAC43003.1	cholinesterase activity;plant-type cell wall;plasmodesma;chloroplast stroma;lipase activity	AT5G14450	6.35541	53	54	6.35541	contig_17	0	801	5.61827	39	39	5.61827	contig_17	0	801	5.6404	46	46	5.6404	contig_17	0	801	5.87136	14.8941	102	105	14.8941	contig_17	0	801	26.6049	162	167	26.6049
contig_9984	127.42	28.7651	113.649	6.39966	113.649	6.39966	91.6589	1.55414e-06	2.97242e-05	cytochrome family subfamily polypeptide 6	937	gi|1032293543|gb|OAP07869.1|CYP76C2 [Arabidopsis thaliana]	66.90%	OAP07869.1	"mitochondrion;endoplasmic reticulum;plasma membrane;coumarin biosynthetic process;lignin biosynthetic process;flavonoid biosynthetic process;oxidoreductase activity, acting on paired donors, with incorporation or reduction of molecular oxygen, NAD(P)H as one donor, and incorporation of one atom of oxygen;oxygen binding;identical protein binding;p-coumarate 3-hydroxylase activity"		111.979	1113	1113	111.979	contig_9984	0	937	91.9923	747	747	91.9923	contig_9984	0	937	94.0237	897	897	94.0237	contig_9984	0	937	99.3317	22.1906	183	183	22.1906	contig_9984	0	937	24.2414	178	178	24.2414
contig_9688	89.9671	76.1524	81.4461	5.98031	81.4461	5.98031	98.0572	1.19618e-06	2.44348e-05	---NA---	422						19.2118	86	86	19.2118	contig_9688	0	422	29.5312	108	108	29.5312	contig_9688	0	422	18.1538	78	78	18.1538	contig_9688	0	422	22.2989	12.6544	47	47	12.6544	contig_9688	0	422	16.9337	56	56	16.9337
contig_3579	373.925	216.297	-293.793	-10.9445	-293.793	-10.9445	50.7493	1.49775e-05	0.000154008	Phosphate-responsive 1 family	784	gi|16323270|gb|AAL15369.1|AT5g64260/MSJ1_10 [Arabidopsis thaliana]/gi|11908088|gb|AAG41473.1|AF326891_1putative phi-1 protein [Arabidopsis thaliana]/gi|14190477|gb|AAK55719.1|AF380638_1AT5g64260/MSJ1_10 [Arabidopsis thaliana]/gi|9759402|dbj|BAB09857.1|phi-1-like protein [Arabidopsis thaliana]/gi|332010480|gb|AED97863.1|EXORDIUM like 2 [Arabidopsis thaliana]/gi|12642896|gb|AAK00390.1|AF339708_1put…	74.50%	AAK55719.1;AAL15369.1;AAM65190.1;OAO94855.1;Q9FE06.1;AAK00390.1;AED97863.1;BAB09857.1;AAG41473.1;NP_201231.1	response to hypoxia;extracellular space;Golgi apparatus;cytosol;plant-type cell wall;plasmodesma;chloroplast;response to brassinosteroid;membrane;growth;apoplast;defense response to fungus	EXL2	272.955	2270	2270	272.955	contig_3579	0	784	391.504	2660	2660	391.504	contig_3579	0	784	305.548	2439	2439	305.548	contig_3579	0	784	323.336	41.4483	286	286	41.4483	contig_3579	0	784	17.5786	108	108	17.5786
contig_8774	106.245	90.9023	96.7152	131.822	96.7152	131.822	385.758	5.45193e-09	6.8387e-07	Zinc finger (C3HC4-type RING finger) family	991	gi|21539497|gb|AAM53301.1|putative protein [Arabidopsis thaliana]/gi|23198328|gb|AAN15691.1|putative protein [Arabidopsis thaliana]	49.10%	AAN15691.1;AAM53301.1			0.761024	8	8	0.761024	contig_8774	0	991	0.465754	4	4	0.465754	contig_8774	0	991	0.991084	10	10	0.991084	contig_8774	0	991	0.739287	5.15936	45	45	5.15936	contig_8774	0	991	2.83287	22	22	2.83287
contig_16675	155.578	124.697	137.72	9.65994	137.72	9.65994	194.272	8.22784e-08	3.92172e-06	nudix hydrolase homolog 10	463	gi|1032278654|gb|OAO92982.1|NUDT2 [Arabidopsis thaliana]	69.50%	OAO92982.1	nucleus;cytosol;response to oxidative stress;ADP-ribose diphosphatase activity;NAD binding		11.1986	55	55	11.1986	contig_16675	0	463	18.6918	75	75	18.6918	contig_16675	0	463	17.819	84	84	17.819	contig_16675	0	463	15.9031	21.8407	89	89	21.8407	contig_16675	0	463	17.6391	64	64	17.6391
contig_1914	96.7653	56.6171	84.4644	8.10014	84.4644	8.10014	169.814	1.39737e-07	5.49864e-06	---NA---	957						57.0359	579	579	57.0359	contig_1914	0	957	55.9469	464	464	55.9469	contig_1914	0	957	52.5463	512	512	52.5463	contig_1914	0	957	55.1764	17.2152	145	145	17.2152	contig_1914	0	957	7.33379	55	55	7.33379
contig_3400	159.087	60.1316	114.691	5.09979	114.691	5.09979	11.9131	0.00254424	0.00808246	kinase family	411	gi|1032279083|gb|OAO93411.1|hypothetical protein AXX17_AT5G35440 [Arabidopsis thaliana]	56.00%	OAO93411.1	plasma membrane;kinase activity		75.6927	329	330	75.6927	contig_3400	0	411	53.6243	189	191	53.6243	contig_3400	0	411	77.6651	323	325	77.6651	contig_3400	0	411	68.994	31.5152	112	114	31.5152	contig_3400	0	411	27.0119	86	87	27.0119
contig_20920	191.189	92.1962	152.341	11.7578	152.341	11.7578	28.8138	0.000122338	0.000745899	Pectin lyase-like superfamily	1719	gi|18409790|ref|NP_566979.1|Pectin lyase-like superfamily protein [Arabidopsis thaliana]/gi|62320498|dbj|BAD95042.1|pectate lyase -like protein [Arabidopsis thaliana]/gi|32129931|sp|Q9SCP2.2|PLY12_ARATHRecName: Full=Probable pectate lyase 12 Flags: Precursor/gi|332645525|gb|AEE79046.1|Pectin lyase-like superfamily protein [Arabidopsis thaliana]	80.90%	BAD95042.1;AEE79046.1;NP_566979.1;Q9SCP2.2	"extracellular region;defense response, incompatible interaction;pectate lyase activity;cell wall modification involved in multidimensional cell growth;pectin catabolic process;anchored component of plasma membrane;metal ion binding"	AT3G53190	13.3812	244	244	13.3812	contig_20920	0	1719	15.1035	225	225	15.1035	contig_20920	0	1719	13.9983	245	245	13.9983	contig_20920	0	1719	14.161	204.57	3095	3095	204.57	contig_20920	0	1719	142.158	1915	1915	142.158
contig_2854	128.65	71.8965	94.2911	74.9157	94.2911	74.9157	28.8488	0.0001218	0.000743488	cotton fiber	717	gi|62320650|dbj|BAD95317.1|hypothetical protein [Arabidopsis thaliana]/gi|23197968|gb|AAN15511.1|unknown protein [Arabidopsis thaliana]/gi|332191193|gb|AEE29314.1|cotton fiber protein [Arabidopsis thaliana]/gi|1032298188|gb|OAP12513.1|hypothetical protein AXX17_AT1G16140 [Arabidopsis thaliana]/gi|30684344|ref|NP_849669.1|cotton fiber protein [Arabidopsis thaliana]/gi|22531078|gb|AAM97043.1|unknow…	79.33%	BAD95317.1;AAN15511.1;AEE29314.1;AAM97043.1;OAP12513.1;NP_849669.1	nucleus	AT1G15385	0.525924	4	4	0.525924	contig_2854	0	717	1.93122	12	12	1.93122	contig_2854	0	717	1.36983	10	10	1.36983	contig_2854	0	717	1.27566	2.8524	18	18	2.8524	contig_2854	0	717	4.27139	24	24	4.27139
contig_14063	154.953	119.339	139.548	14.1235	139.548	14.1235	184.479	1.0087e-07	4.50452e-06	Disease resistance-responsive (dirigent ) family	408	gi|6227011|gb|AAF06047.1|AC009513_3F12P19.3 [Arabidopsis thaliana]/gi|75207436|sp|Q9SS03.1|DIR21_ARATHRecName: Full=Dirigent protein 21 Short=AtDIR21 Flags: Precursor/gi|332196314|gb|AEE34435.1|Disease resistance-responsive (dirigent-like protein) family protein [Arabidopsis thaliana]/gi|15218836|ref|NP_176762.1|Disease resistance-responsive (dirigent-like protein) family protein [Arabidopsis tha…	69.10%	AEE34435.1;Q9SS03.1;NP_176762.1;AAF06047.1	aminoacyl-tRNA ligase activity;extracellular region;cell wall;tRNA aminoacylation for protein translation;defense response;chloroplast stroma;lignan biosynthetic process;ion binding;plant ovule development;organic cyclic compound binding;heterocyclic compound binding	AT1G65870	8.78022	38	38	8.78022	contig_14063	0	408	13.0097	46	46	13.0097	contig_14063	0	408	10.1105	42	42	10.1105	contig_14063	0	408	10.6335	32.0254	115	115	32.0254	contig_14063	0	408	20.9552	67	67	20.9552
contig_10682	134.709	59.8851	-114.838	-4.36397	-114.838	-4.36397	65.7077	5.60423e-06	7.53314e-05	Heavy metal transport detoxification superfamily	315	gi|79316252|ref|NP_001030928.1|Heavy metal transport/detoxification superfamily protein [Arabidopsis thaliana]/gi|15223416|ref|NP_171656.1|Heavy metal transport/detoxification superfamily protein [Arabidopsis thaliana]/gi|20258999|gb|AAM14215.1|unknown protein [Arabidopsis thaliana]/gi|332189174|gb|AEE27295.1|Heavy metal transport/detoxification superfamily protein [Arabidopsis thaliana]/gi|19222…	73.75%	NP_001030928.1;CAA71173.1;O03982.1;NP_171656.1;AEE27296.1;AAM14215.1;AEE27295.1;AAL36161.1		AT1G01490	167.894	561	561	167.894	contig_10682	0	315	138.102	375	377	138.102	contig_10682	0	315	140.933	452	452	140.933	contig_10682	0	315	148.976	33.1844	92	92	33.1844	contig_10682	0	315	33.6237	83	83	33.6237
contig_10746	324.24	159.613	250.949	7.59931	250.949	7.59931	35.7993	5.52423e-05	0.000407722	heat shock 60-2	1332	"gi|34098917|gb|AAQ56841.1|At3g23990 [Arabidopsis thaliana]/gi|332643321|gb|AEE76842.1|heat shock protein 60 [Arabidopsis thaliana]/gi|9294668|dbj|BAB03017.1|chaperonin hsp60, mitochondrial precursor (HSP60) [Arabidopsis thaliana]/gi|12644189|sp|P29197.2|CH60A_ARATHRecName: Full=Chaperonin CPN60, mitochondrial AltName: Full=HSP60 Flags: Precursor/gi|20466256|gb|AAM20445.1|mitochondrial chaperonin…	89.00%	AAQ56841.1;NP_189041.1;AAM20445.1;BAB03017.1;OAP03825.1;P29197.2;AEE76842.1	copper ion binding;ATP binding;mitochondrial matrix;vacuolar membrane;Golgi apparatus;plasma membrane;'de novo' protein folding;inflammatory response;response to heat;chloroplast stroma;response to cytokinin;chloroplast envelope;cytosolic ribosome;protein refolding;protein binding involved in protein folding;protein import into mitochondrial intermembrane space;response to cadmium ion;unfolded pr…	HSP60	40.9785	579	579	40.9785	contig_10746	0	1332	39.3298	453	454	39.3298	contig_10746	0	1332	33.7711	458	458	33.7711	contig_10746	0	1332	38.0265	244.386	2865	2865	244.386	contig_10746	0	1332	358.011	3737	3737	358.011
contig_9598	107.705	20.7953	101.087	29.8824	101.087	29.8824	107.083	8.49367e-07	1.93532e-05	Galactosyl transferase GMA12 MNN10 family	653	gi|1032283479|gb|OAO97806.1|hypothetical protein AXX17_AT4G43650 [Arabidopsis thaliana]	66.30%	OAO97806.1	Golgi membrane;endosome;trans-Golgi network;galactosyltransferase activity;xyloglucan biosynthetic process;mucilage biosynthetic process;seed coat development;galactoglucomannan metabolic process;xyloglucan 6-xylosyltransferase activity;UDP-xylosyltransferase activity;protein homodimerization activity;root hair elongation;galactomannan biosynthetic process		2.02114	14	14	2.02114	contig_9598	0	653	4.41771	25	25	4.41771	contig_9598	0	653	4.06102	27	27	4.06102	contig_9598	0	653	3.49996	100.397	577	577	100.397	contig_9598	0	653	90.0877	461	461	90.0877
contig_12596	114.384	62.3784	86.3821	14.3621	86.3821	14.3621	31.6791	8.66058e-05	0.000575576	Basic-leucine zipper (bZIP) transcription factor family	364	gi|8953388|emb|CAB96661.1|HY5 [Arabidopsis thaliana]/gi|332004270|gb|AED91653.1|Basic-leucine zipper (bZIP) transcription factor family protein [Arabidopsis thaliana]/gi|18416509|ref|NP_568246.1|Basic-leucine zipper (bZIP) transcription factor family protein [Arabidopsis thaliana]/gi|20138463|sp|O24646.1|HY5_ARATHRecName: Full=Transcription factor HY5 AltName: Full=Protein LONG HYPOCOTYL 5 AltNam…	81.00%	OAO96047.1;BAA21116.1;CAB96661.1;BAF01225.1;NP_568246.1;AED91653.1;ABF58937.1;O24646.1;BAA21327.1	"RNA polymerase II regulatory region sequence-specific DNA binding;transcription factor activity, sequence-specific DNA binding;protein binding;nucleus;transcription, DNA-templated;regulation of transcription, DNA-templated;red, far-red light phototransduction;photomorphogenesis;response to abscisic acid;gibberellic acid mediated signaling pathway;regulation of photomorphogenesis;response to red …	HY5	13.9854	54	54	13.9854	contig_12596	0	364	11.7293	37	37	11.7293	contig_12596	0	364	10.5232	39	39	10.5232	contig_12596	0	364	12.0793	5.93074	19	19	5.93074	contig_12596	0	364	7.36199	21	21	7.36199
contig_33389	86.6753	76.6327	80.4378	7.60308	80.4378	7.60308	282.393	1.87758e-08	1.53082e-06	peroxidase	355	gi|1032276892|gb|OAO91220.1|hypothetical protein AXX17_AT5G06350 [Arabidopsis thaliana]/gi|21594792|gb|AAM66044.1|peroxidase [Arabidopsis thaliana]/gi|42494613|gb|AAS17637.1|peroxidase ATP29a [Arabidopsis thaliana]	77.10%	AAS17637.1;AAM66044.1;OAO91220.1	defense response to nematode;peroxidase activity;vacuolar membrane;Golgi apparatus;cytosol;response to oxidative stress;response to light stimulus;plant-type cell wall;response to cytokinin;unidimensional cell growth;flower development;heme binding;defense response to bacterium;hydrogen peroxide catabolic process;metal ion binding;apoplast;defense response to fungus;pathogen-associated molecular …		18.5888	70	70	18.5888	contig_33389	0	355	14.952	46	46	14.952	contig_33389	0	355	13.8333	50	50	13.8333	contig_33389	0	355	15.7914	17.2831	54	54	17.2831	contig_33389	0	355	8.62701	24	24	8.62701
contig_1862	337.837	267.668	-299.806	-5.20836	-299.806	-5.20836	156.921	1.9057e-07	6.85812e-06	AT3g07470 F21O3_18	555	"gi|1063710064|ref|NP_001326338.1|transmembrane protein, putative (Protein of unknown function, DUF538) [Arabidopsis thaliana]/gi|1039014695|gb|ANM64299.1|transmembrane protein, putative (Protein of unknown function, DUF538) [Arabidopsis thaliana]"	75.90%	NP_001326338.1;ANM64299.1	extracellular region;vacuole;chloroplast	AT3G07470	405.114	2385	2385	405.114	contig_1862	0	555	339.934	1635	1635	339.934	contig_1862	0	555	368.091	2080	2080	368.091	contig_1862	0	555	371.046	72.2667	353	353	72.2667	contig_1862	0	555	78.4041	341	341	78.4041
contig_22372	155.515	47.5725	144.899	38.2411	144.899	38.2411	158.444	1.83477e-07	6.70411e-06	Integrase-type DNA-binding superfamily	743	gi|16974345|gb|AAL31157.1|AT5g25190/F21J6_103 [Arabidopsis thaliana]/gi|1032276366|gb|OAO90694.1|ESE3 [Arabidopsis thaliana]/gi|75249799|sp|Q94AW5.1|ERF03_ARATHRecName: Full=Ethylene-responsive transcription factor ERF003/gi|15238727|ref|NP_197901.1|Integrase-type DNA-binding superfamily protein [Arabidopsis thaliana]/gi|332006027|gb|AED93410.1|Integrase-type DNA-binding superfamily protein [Arab…	85.80%	AAL31157.1;AED93410.1;NP_197901.1;Q94AW5.1;AAK74017.1;OAO90694.1	"transcription factor activity, sequence-specific DNA binding;protein binding;nucleus;transcription, DNA-templated;regulation of transcription, DNA-templated;response to osmotic stress;response to cold;response to water deprivation;ethylene-activated signaling pathway;cutin biosynthetic process;wax metabolic process;sequence-specific DNA binding"	ESE3	3.93328	31	31	3.93328	contig_22372	0	743	4.03789	26	26	4.03789	contig_22372	0	743	3.70129	28	28	3.70129	contig_22372	0	743	3.89082	131.054	857	857	131.054	contig_22372	0	743	128.982	751	751	128.982
contig_563	95.5877	62.333	87.0675	18.1911	87.0675	18.1911	106.13	8.79461e-07	1.97661e-05	MATE efflux family	1748	gi|14030731|gb|AAK53040.1|AF375456_1AT5g65380/MNA5_11 [Arabidopsis thaliana]/gi|15238439|ref|NP_201341.1|MATE efflux family protein [Arabidopsis thaliana]/gi|75171300|sp|Q9FKQ1.1|DTX27_ARATHRecName: Full=Protein DETOXIFICATION 27 Short=AtDTX27 AltName: Full=Multidrug and toxic compound extrusion protein 27 Short=MATE protein 27/gi|23506079|gb|AAN28899.1|At5g65380/MNA5_11 [Arabidopsis thaliana]/gi…	75.30%	BAB11560.1;AAK53040.1;AED98045.1;NP_201341.1;Q9FKQ1.1;AAN28899.1	plasma membrane;fruit ripening;antiporter activity;integral component of membrane	AT5G65380	4.79988	89	89	4.79988	contig_563	0	1748	5.28103	80	80	5.28103	contig_563	0	1748	5.1131	89	91	5.1131	contig_563	0	1748	5.06467	21.1901	326	326	21.1901	contig_563	0	1748	36.5741	501	501	36.5741
contig_5530	104.776	76.623	88.2513	24.342	88.2513	24.342	105.39	9.03716e-07	2.01014e-05	calcium-dependent kinase	1276	gi|9759385|dbj|BAB10036.1|calcium-dependent protein kinase [Arabidopsis thaliana]/gi|332004388|gb|AED91771.1|calcium-dependent protein kinase 17 [Arabidopsis thaliana]/gi|1032281053|gb|OAO95381.1|CPK17 [Arabidopsis thaliana]/gi|75334077|sp|Q9FMP5.1|CDPKH_ARATHRecName: Full=Calcium-dependent protein kinase 17/gi|53850561|gb|AAU95457.1|At5g12180 [Arabidopsis thaliana]/gi|15239888|ref|NP_196779.1|ca…	88.60%	Q9FMP5.1;NP_196779.1;AAU95457.1;AED91771.1;OAO95381.1;BAB10036.1	calmodulin-dependent protein kinase activity;calcium ion binding;calmodulin binding;ATP binding;nucleus;vacuole;cytosol;plasma membrane;plasmodesma;chloroplast;response to salt stress;abscisic acid-activated signaling pathway;calcium-dependent protein serine/threonine kinase activity;regulation of stomatal movement;regulation of anion channel activity;peptidyl-serine phosphorylation;protein phosp…	CPK17	3.10299	42	42	3.10299	contig_5530	0	1276	4.15985	46	46	4.15985	contig_5530	0	1276	4.07952	53	53	4.07952	contig_5530	0	1276	3.78079	5.52075	62	62	5.52075	contig_5530	0	1276	4.00025	40	40	4.00025
contig_1934	84.4973	29.974	71.6637	4.55857	71.6637	4.55857	61.7699	7.09792e-06	8.94514e-05	NAD(P)-binding Rossmann-fold superfamily	1772	gi|1063687468|ref|NP_001321845.1|NAD(P)-binding Rossmann-fold superfamily protein [Arabidopsis thaliana]/gi|4587518|gb|AAD25749.1|AC007060_7Strong similarity to F19I3.8 gi|3033381 putative UDP-galactose-4-epimerase from Arabidopsis thaliana BAC gb|AC004238 and is a member of PF|01370 the NAD dependent epimerase/dehydratase family. EST gb|AA597338 comes from this gene [Arabidopsis thaliana]/gi|103…	87.50%	AAD25749.1;AAL57628.1;BAH19858.1;Q9SA77.1;ANM59489.1;NP_001321844.1;NP_001321845.1;AEE31252.1;OAP14192.1;AEE31251.1;AAO11530.1;AAK17176.1;ANM59490.1;NP_174350.2;NP_001319115.1;AAO39213.1	UDP-glucose 4-epimerase activity;galactose metabolic process;plant-type cell wall biogenesis;integral component of membrane;arabinose biosynthetic process;Golgi cisterna membrane;UDP-L-arabinose biosynthetic process;capsule polysaccharide biosynthetic process;UDP-arabinose 4-epimerase activity	MUR4	50.5408	950	950	50.5408	contig_1934	0	1772	56.1975	863	863	56.1975	contig_1934	0	1772	49.8288	899	899	49.8288	contig_1934	0	1772	52.189	18.7871	293	293	18.7871	contig_1934	0	1772	19.4436	270	270	19.4436
contig_6444	113.378	38.9537	-102.089	-5.56816	-102.089	-5.56816	65.1614	5.78624e-06	7.71499e-05	O-methyltransferase family	493	gi|17065522|gb|AAL32915.1|O-methyltransferase [Arabidopsis thaliana]/gi|20148473|gb|AAM10127.1|O-methyltransferase [Arabidopsis thaliana]/gi|15239571|ref|NP_200227.1|O-methyltransferase 1 [Arabidopsis thaliana]/gi|332009077|gb|AED96460.1|O-methyltransferase 1 [Arabidopsis thaliana]/gi|10178165|dbj|BAB11578.1|O-methyltransferase [Arabidopsis thaliana]/gi|24212073|sp|Q9FK25.1|OMT1_ARATHRecName: Ful…	68.10%	AED96460.1;BAB11578.1;NP_200227.1;AAM10127.1;AAL32915.1;Q9FK25.1;AAM64849.1	nucleus;cytosol;plasma membrane;plasmodesma;lignin biosynthetic process;acetylserotonin O-methyltransferase activity;melatonin biosynthetic process;luteolin O-methyltransferase activity;quercetin 3-O-methyltransferase activity;methylation;myricetin 3'-O-methyltransferase activity;protein dimerization activity;caffeate O-methyltransferase activity;flavonol biosynthetic process	OMT1	135.002	706	706	135.002	contig_6444	0	493	115.391	492	493	115.391	contig_6444	0	493	122.92	617	617	122.92	contig_6444	0	493	124.437	22.1249	96	96	22.1249	contig_6444	0	493	23.2956	90	90	23.2956
contig_1384	86.4738	39.6955	71.6703	4.63721	71.6703	4.63721	14.0771	0.00147885	0.00524989	pyruvate decarboxylase	717	gi|7320710|emb|CAB81915.1|pyruvate decarboxylase-like protein [Arabidopsis thaliana]/gi|332002944|gb|AED90327.1|Thiamine pyrophosphate dependent pyruvate decarboxylase family protein [Arabidopsis thaliana]/gi|75181402|sp|Q9M040.1|PDC4_ARATHRecName: Full=Pyruvate decarboxylase 4 Short=AtPDC4/gi|15240950|ref|NP_195752.1|Thiamine pyrophosphate dependent pyruvate decarboxylase family protein [Arabido…	90.70%	CAB81915.1;NP_195752.1;AED90327.1;Q9M040.1	magnesium ion binding;response to hypoxia;pyruvate decarboxylase activity;cytosol;chloroplast;membrane;thiamine pyrophosphate binding;response to anoxia	AT5G01320	16.1722	122	123	16.1722	contig_1384	0	717	16.0935	100	100	16.0935	contig_1384	0	717	26.8486	196	196	26.8486	contig_1384	0	717	19.7048	51.6601	322	326	51.6601	contig_1384	0	717	70.122	389	394	70.122
contig_5834	146.158	89.9134	122.211	29.1393	122.211	29.1393	14.5426	0.00132782	0.00481156	aspartate aminotransferase	320	gi|62319863|dbj|BAD93907.1|aspartate aminotransferase [Arabidopsis thaliana]	81.40%	BAD93907.1	DNA binding;L-aspartate:2-oxoglutarate aminotransferase activity;GTPase activator activity;copper ion binding;cell wall;nucleus;mitochondrial matrix;vacuolar membrane;peroxisome;Golgi apparatus;cytosol;plasma membrane;nitrogen compound metabolic process;biosynthetic process;plasmodesma;plastid;leaf senescence;vesicle-mediated transport;pyridoxal phosphate binding;identical protein binding;respons…		3.82979	13	13	3.82979	contig_5834	0	320	6.13012	17	17	6.13012	contig_5834	0	320	3.06926	10	10	3.06926	contig_5834	0	320	4.34306	23.4342	66	66	23.4342	contig_5834	0	320	33.4971	84	84	33.4971
contig_30661	100.673	79.3953	90.4673	#DIV/0!	90.4673	#DIV/0!	192.273	8.57006e-08	4.02671e-06	lysyl-tRNA synthetase	487	"gi|15229833|ref|NP_187777.1|lysyl-tRNA synthetase 1 [Arabidopsis thaliana]/gi|25083918|gb|AAN72134.1|lysyl-tRNA synthetase [Arabidopsis thaliana]/gi|332641565|gb|AEE75086.1|lysyl-tRNA synthetase 1 [Arabidopsis thaliana]/gi|20466171|gb|AAM20403.1|lysyl-tRNA synthetase [Arabidopsis thaliana]/gi|4325324|gb|AAD17333.1|lysyl-tRNA synthetase [Arabidopsis thaliana]/gi|6041823|gb|AAF02138.1|AC009918_10l…	67.80%	AAF02138.1;OAP03159.1;AAD17333.1;Q9ZPI1.1;AAN72134.1;AAM20403.1;AEE75086.1;NP_187777.1	DNA binding;lysine-tRNA ligase activity;ATP binding;mitochondrion;cytosol;lysyl-tRNA aminoacylation;plasmodesma;chloroplast;metal ion binding;plant ovule development	ATKRS-1	0	0	0	0	contig_30661	0	487	0	0	0	0	contig_30661	0	487	0	0	0	0	contig_30661	0	487	0	0	0	0	0	contig_30661	0	487	0	0	0	0
contig_6171	99.8377	49.7294	71.0986	4.68344	71.0986	4.68344	17.5417	0.000705651	0.00291739	kinase superfamily	1277	gi|21280977|gb|AAM45011.1|putative protein kinase [Arabidopsis thaliana]/gi|330250892|gb|AEC05986.1|Protein kinase superfamily protein [Arabidopsis thaliana]/gi|75268033|sp|Q9ZUF4.1|RIPK_ARATHRecName: Full=Serine/threonine-protein kinase RIPK AltName: Full=ACIK1A/PBL14 AltName: Full=ACRE protein ortholog 264A Short=AtACRE264a AltName: Full=PBS1-like protein 14 AltName: Full=RPM1-induced protein k…	83.90%	NP_178651.1;Q9ZUF4.1;AAL07094.1;AEC05986.1;AAC95171.1;AAM45011.1	transmembrane receptor protein serine/threonine kinase activity;ATP binding;plasma membrane;protein phosphorylation;cell surface receptor signaling pathway;defense response to bacterium	RIPK	37.3544	505	506	37.3544	contig_6171	0	1277	28.0118	310	310	28.0118	contig_6171	0	1277	35.4564	461	461	35.4564	contig_6171	0	1277	33.6075	13.1682	148	148	13.1682	contig_6171	0	1277	25.7814	258	258	25.7814
contig_4764	94.2699	78.9576	81.8949	4.80353	81.8949	4.80353	26.5349	0.000164765	0.000937532	stress related	466	gi|1032299089|gb|OAP13414.1|hypothetical protein AXX17_AT1G61280 [Arabidopsis thaliana]	57.00%	OAP13414.1	vacuole;endoplasmic reticulum;lipid particle;pollen development;lipid particle organization;positive regulation of growth;developmental vegetative growth;positive regulation of response to water deprivation		23.8714	99	118	23.8714	contig_4764	0	466	21.5429	78	87	21.5429	contig_4764	0	466	19.1796	80	91	19.1796	contig_4764	0	466	21.5313	32.9158	109	135	32.9158	contig_4764	0	466	38.0633	119	139	38.0633
contig_9889	83.1211	63.9286	75.3509	6.0725	75.3509	6.0725	127.346	4.31952e-07	1.23337e-05	C2H2 and C2HC zinc fingers superfamily	815	"gi|12325312|gb|AAG52593.1|AC016447_2putative zinc finger protein 21453-22187 [Arabidopsis thaliana]/gi|225898064|dbj|BAH30364.1|hypothetical protein, partial [Arabidopsis thaliana]/gi|332196664|gb|AEE34785.1|C2H2 and C2HC zinc fingers superfamily protein [Arabidopsis thaliana]/gi|15221378|ref|NP_177003.1|C2H2 and C2HC zinc fingers superfamily protein [Arabidopsis thaliana]/gi|117958743|gb|ABK596…	71.40%	Q9C9H1.1;AAG52593.1;AEE34785.1;ABK59680.1;OAP13372.1;BAH30364.1;NP_177003.1	"transcription factor activity, sequence-specific DNA binding;nucleus;transcription, DNA-templated;regulation of transcription, DNA-templated;multicellular organism development;zinc ion binding;cytokinin-activated signaling pathway;gibberellic acid mediated signaling pathway;trichome branching;glucosinolate metabolic process;cytosolic ribosome;sequence-specific DNA binding;transcription regulator…	AT1G68360	24.2909	210	210	24.2909	contig_9889	0	815	23.786	168	168	23.786	contig_9889	0	815	16.51	137	137	16.51	contig_9889	0	815	21.529	12.9653	93	93	12.9653	contig_9889	0	815	15.6574	100	100	15.6574
contig_2061	202.252	165.895	-181.654	-4.11056	-181.654	-4.11056	328.603	1.03002e-08	1.06082e-06	---NA---	316						228.818	744	767	228.818	contig_2061	0	316	252.326	671	691	252.326	contig_2061	0	316	239.014	749	769	239.014	contig_2061	0	316	240.053	62.9227	171	175	62.9227	contig_2061	0	316	50.074	118	124	50.074
contig_13127	111.904	68.3912	83.9333	14.7746	83.9333	14.7746	37.4321	4.68351e-05	0.000361849	lysine histidine transporter 1	381	gi|1063735345|ref|NP_001332682.1|lysine histidine transporter 1 [Arabidopsis thaliana]/gi|1039022201|gb|ANM71133.1|lysine histidine transporter 1 [Arabidopsis thaliana]/gi|1063729189|ref|NP_001318716.1|lysine histidine transporter 1 [Arabidopsis thaliana]/gi|1039022202|gb|AED94594.2|lysine histidine transporter 1 [Arabidopsis thaliana]	88.20%	ANM71133.1;NP_001332682.1;NP_001318716.1;AED94594.2	amino acid transmembrane transport;amine transmembrane transporter activity;plasma membrane;acidic amino acid transmembrane transporter activity;neutral amino acid transmembrane transporter activity;symporter activity;neutral amino acid transport;integral component of membrane;amino acid import;response to karrikin	LHT1	7.91785	32	32	7.91785	contig_13127	0	381	7.2687	24	24	7.2687	contig_13127	0	381	3.09343	12	12	3.09343	contig_13127	0	381	6.09332	9.54293	32	32	9.54293	contig_13127	0	381	25.1197	75	75	25.1197
contig_3	98.2192	49.8859	79.312	4.1082	79.312	4.1082	23.2542	0.000264062	0.00134316	NADH-dependent glutamate synthase 1	1241	gi|1032281921|gb|OAO96249.1|GLT1 [Arabidopsis thaliana]	67.00%	OAO96249.1	nucleotide binding;mitochondrion;cytosol;glutamate biosynthetic process;chloroplast stroma;response to cytokinin;chloroplast envelope;glutamate synthase (NADH) activity;ammonia assimilation cycle;nitrate assimilation;anion binding;response to cadmium ion;metal ion binding;cofactor binding;developmental growth;oxidation-reduction process		27.8789	367	367	27.8789	contig_3	0	1241	24.4542	263	263	24.4542	contig_3	0	1241	24.2178	306	306	24.2178	contig_3	0	1241	25.517	50.264	548	549	50.264	contig_3	0	1241	63.8554	621	621	63.8554
contig_6831	85.3313	77.2481	75.4004	6.63287	75.4004	6.63287	67.6419	5.01475e-06	6.94114e-05	Leucine-rich repeat transmembrane kinase	837	"gi|224589440|gb|ACN59254.1|leucine-rich repeat receptor-like protein kinase, partial [Arabidopsis thaliana]"	89.00%	ACN59254.1	protein serine/threonine kinase activity;ATP binding;plasma membrane;protein phosphorylation;transmembrane receptor protein tyrosine kinase signaling pathway;integral component of membrane		12.9525	115	115	12.9525	contig_6831	0	837	14.1998	102	103	14.1998	contig_6831	0	837	15.2546	130	130	15.2546	contig_6831	0	837	14.1357	13.8462	102	102	13.8462	contig_6831	0	837	14.636	94	96	14.636
contig_11690	84.1642	57.0466	79.2551	9.39117	79.2551	9.39117	88.6941	1.76525e-06	3.28115e-05	basic helix-loop-helix (bHLH) DNA-binding superfamily	1295	gi|26453118|dbj|BAC43635.1|putative bHLH transcription factor bHLH106 [Arabidopsis thaliana]/gi|15226839|ref|NP_181646.1|basic helix-loop-helix (bHLH) DNA-binding superfamily protein [Arabidopsis thaliana]/gi|75278862|sp|O80674.1|BH106_ARATHRecName: Full=Transcription factor bHLH106 AltName: Full=Basic helix-loop-helix protein 106 Short=AtbHLH106 Short=bHLH 106 AltName: Full=Transcription factor …	72.40%	NP_181646.1;O80674.1;BAC43635.1;AAD11998.1;AEC09935.1;OAP09009.1	"DNA binding;transcription factor activity, sequence-specific DNA binding;nucleus;mitochondrion;transcription, DNA-templated;regulation of transcription, DNA-templated;anthocyanin-containing compound biosynthetic process;chloroplast envelope;response to chitin;cellular response to phosphate starvation;hyperosmotic salinity response;protein dimerization activity;root hair cell development"	AT2G41130	9.0268	124	124	9.0268	contig_11690	0	1295	9.97972	112	112	9.97972	contig_11690	0	1295	9.32867	123	123	9.32867	contig_11690	0	1295	9.44506	30.3573	346	346	30.3573	contig_11690	0	1295	52.8169	536	536	52.8169
contig_7186	110.425	60.1216	80.2415	11.3324	80.2415	11.3324	20.1905	0.000434098	0.00197723	MIP18 family (DUF59)	897	gi|332645196|gb|AEE78717.1|MIP18 family protein (DUF59) [Arabidopsis thaliana]/gi|902951524|sp|A8MR89.1|AEL1_ARATHRecName: Full=Protein AE7-like 1 AltName: Full=MIP18 family protein At3g50845/gi|145332803|ref|NP_001078267.1|MIP18 family protein (DUF59) [Arabidopsis thaliana]	74.17%	A8MR89.1;NP_001078267.1;AEE78717.1	nucleus;polarity specification of adaxial/abaxial axis;vacuolar sorting signal binding;iron-sulfur cluster assembly;regulation of cell proliferation;regulation of cell cycle;intrachromosomal DNA recombination;positive regulation of response to DNA damage stimulus	AT3G50845	7.35678	70	70	7.35678	contig_7186	0	897	9.26212	72	72	9.26212	contig_7186	0	897	6.67916	61	61	6.67916	contig_7186	0	897	7.76602	13.5534	107	107	13.5534	contig_7186	0	897	18.3516	129	129	18.3516
contig_1330	326.754	245.188	-283.328	-4.8572	-283.328	-4.8572	107.968	8.22594e-07	1.89572e-05	Cold acclimation WCOR413 family	598	gi|15810635|gb|AAL07242.1|putative cold acclimation protein [Arabidopsis thaliana]/gi|4835234|emb|CAB42912.1|putative cold acclimation protein [Arabidopsis thaliana]/gi|332645194|gb|AEE78715.1|cold-regulated 413-plasma membrane 2 [Arabidopsis thaliana]/gi|13430786|gb|AAK26015.1|AF360305_1putative cold acclimation protein [Arabidopsis thaliana]/gi|75212080|sp|Q9SVL6.1|CRPM2_ARATHRecName: Full=Cold…	70.00%	AEE78715.1;AAG13394.1;NP_190652.1;OAP05605.1;Q9SVL6.1;CAB42912.1;AAL07242.1;AAK26015.1	mitochondrion;vacuolar membrane;plasma membrane;cold acclimation;response to abscisic acid;response to sucrose;response to glucose;response to fructose;chloroplast envelope;integral component of membrane;cellular response to water deprivation	COR413-PM2	355.648	2133	2256	355.648	contig_1330	0	598	326.104	1575	1690	326.104	contig_1330	0	598	388.596	2206	2366	388.596	contig_1330	0	598	356.782	90.0604	444	474	90.0604	contig_1330	0	598	78.7413	344	369	78.7413
contig_4434	242.141	175.2	-219.733	-5.11905	-219.733	-5.11905	65.4082	5.70311e-06	7.63779e-05	Syntaxin t-SNARE family	325	gi|6693035|gb|AAF24961.1|AC012375_24T22C5.15 [Arabidopsis thaliana]	59.75%	AAF24961.1	nucleus;cytoplasmic part		294.418	1015	1015	294.418	contig_4434	0	325	236.817	667	667	236.817	contig_4434	0	325	288.001	953	953	288.001	contig_4434	0	325	273.079	52.7898	151	151	52.7898	contig_4434	0	325	54.9696	140	140	54.9696
contig_8846	456.383	318.771	-396.935	-5.5292	-396.935	-5.5292	73.1241	3.71799e-06	5.58699e-05	xyloglucan endotransglucosylase hydrolase 5	702	gi|5139002|dbj|BAA81669.1|endoxyloglucan transferase [Arabidopsis thaliana]/gi|15240733|ref|NP_196891.1|xyloglucan endotransglucosylase/hydrolase 5 [Arabidopsis thaliana]/gi|38605528|sp|Q9XIW1.1|XTH5_ARATHRecName: Full=Probable xyloglucan endotransglucosylase/hydrolase protein 5 Short=At-XTH5 Short=XTH-5 Flags: Precursor/gi|5533315|gb|AAD45126.1|AF163822_1endoxyloglucan transferase [Arabidopsis t…	77.40%	BAB11115.1;ANM69716.1;ANM69717.1;AED91952.1;NP_001331375.1;AAD45126.1;BAD43991.1;NP_001331376.1;BAA81669.1;NP_196891.1;OAO92857.1;Q9XIW1.1	"hydrolase activity, hydrolyzing O-glycosyl compounds;Golgi apparatus;plasma membrane;aging;response to heat;response to cold;plant-type cell wall;plasmodesma;chloroplast;response to mechanical stimulus;response to low light intensity stimulus;response to auxin;gibberellic acid mediated signaling pathway;response to brassinosteroid;unidimensional cell growth;plant-type cell wall loosening;xyloglu…	XTH5	207.076	1527	1542	207.076	contig_8846	0	702	151.717	916	923	151.717	contig_8846	0	702	218.539	1555	1562	218.539	contig_8846	0	702	192.444	419.36	2545	2591	419.36	contig_8846	0	702	493.526	2680	2715	493.526
contig_3099	86.9341	46.0062	79.9585	11.4628	79.9585	11.4628	131.356	3.82632e-07	1.1372e-05	pseudo-response regulator 3	1873	gi|17063183|gb|AAL32986.1|pseudo-response regulator 5 protein [Arabidopsis thaliana]/gi|1039019783|gb|AED93314.2|two-component response regulator-like protein [Arabidopsis thaliana]/gi|52783225|sp|Q6LA42.2|APRR5_ARATHRecName: Full=Two-component response regulator-like APRR5 AltName: Full=Pseudo-response regulator 5/gi|23506027|gb|AAN28873.1|At5g24470/T31K7_5 [Arabidopsis thaliana]/gi|1063728808|r…	65.90%	Q6LA42.2;NP_568446.2;AAL32986.1;BAB08930.1;AAN28873.1;AED93314.2	"phosphorelay response regulator activity;DNA binding;protein binding;nucleus;circadian rhythm;response to temperature stimulus;photomorphogenesis;red or far-red light signaling pathway;response to red light;response to far red light;negative regulation of protein binding;regulation of circadian rhythm;negative regulation of transcription, DNA-templated;nuclear import"	PRR5	58.3851	1160	1160	58.3851	contig_3099	0	1873	64.0716	1040	1040	64.0716	contig_3099	0	1873	65.4951	1248	1249	65.4951	contig_3099	0	1873	62.6506	7.27948	120	120	7.27948	contig_3099	0	1873	6.81302	100	100	6.81302
contig_153	89.0357	73.1287	80.7004	4.51105	80.7004	4.51105	72.2736	3.88903e-06	5.77944e-05	HXXXD-type acyl-transferase family	1739	"gi|332192892|gb|AEE31013.1|HXXXD-type acyl-transferase family protein [Arabidopsis thaliana]/gi|15218757|ref|NP_174189.1|HXXXD-type acyl-transferase family protein [Arabidopsis thaliana]/gi|1032304603|gb|OAP18928.1|hypothetical protein AXX17_AT1G29150 [Arabidopsis thaliana]/gi|21537295|gb|AAM61636.1|anthranilate N-hydroxycinnamoyl/benzoyltransferase, putative [Arabidopsis thaliana]"	53.60%	AEE31013.1;AAM61636.1;NP_174189.1;OAP18928.1	transferase activity	AT1G28680	38.7062	714	714	38.7062	contig_153	0	1739	37.8884	571	571	37.8884	contig_153	0	1739	25.7543	456	456	25.7543	contig_153	0	1739	34.1163	19.9277	305	305	19.9277	contig_153	0	1739	20.5464	280	280	20.5464
contig_14906	88.4819	28.0546	76.9479	8.63597	76.9479	8.63597	52.7943	1.28975e-05	0.000138345	histone deacetylase	605	gi|110742673|dbj|BAE99248.1|hypothetical protein [Arabidopsis thaliana]/gi|330252633|gb|AEC07727.1|histone deacetylase-like protein [Arabidopsis thaliana]/gi|1032296535|gb|OAP10861.1|hypothetical protein AXX17_AT2G21440 [Arabidopsis thaliana]/gi|20197506|gb|AAM15100.1|Expressed protein [Arabidopsis thaliana]/gi|21593816|gb|AAM65783.1|unknown [Arabidopsis thaliana]/gi|30682825|ref|NP_850063.1|hist…	76.00%	AAM15100.1;OAP10861.1;AAM65783.1;NP_850063.1;BAE99248.1;AEC07727.1		AT2G25625	89.753	576	576	89.753	contig_14906	0	605	69.8065	366	366	69.8065	contig_14906	0	605	68.8327	424	424	68.8327	contig_14906	0	605	76.1307	14.0852	75	75	14.0852	contig_14906	0	605	8.43689	40	40	8.43689
contig_3854	351.961	298.184	-336.541	-7.90696	-336.541	-7.90696	738.331	4.12176e-10	1.46767e-07	jasmonate-zim-domain 1	1481	"gi|12323902|gb|AAG51928.1|AC013258_22unknown protein 53109-54448 [Arabidopsis thaliana]/gi|12744981|gb|AAK06870.1|AF344319_1unknown protein [Arabidopsis thaliana]/gi|18410737|ref|NP_565096.1|TIFY domain/Divergent CCT motif family protein [Arabidopsis thaliana]/gi|332197533|gb|AEE35654.1|TIFY domain/Divergent CCT motif family protein [Arabidopsis thaliana]/gi|1032299948|gb|OAP14273.1|TIFY10B [Ara…	43.90%	AAK62404.1;AAD55281.1;AAP13409.1;AAG51928.1;Q9S7M2.1;NP_565096.1;AEE35654.1;AAK06870.1;OAP14273.1	response to stress;single-organism process;regulation of response to stimulus;regulation of cellular process	TIFY10B	394.592	6162	6199	394.592	contig_3854	0	1481	363.235	4619	4662	363.235	contig_3854	0	1481	397.972	5928	6001	397.972	contig_3854	0	1481	385.266	49.1767	636	641	49.1767	contig_3854	0	1481	46.0112	531	534	46.0112
contig_18772	845.086	496.093	712.79	21.8126	712.79	21.8126	56.9163	9.69544e-06	0.000112463	---NA---	462						34.0766	167	167	34.0766	contig_18772	0	462	35.7161	143	143	35.7161	contig_18772	0	462	32.9514	154	155	32.9514	contig_18772	0	462	34.2481	578.924	2354	2354	578.924	contig_18772	0	462	784.153	2838	2839	784.153
contig_29087	516.622	325.21	409.82	6.21253	409.82	6.21253	56.9121	9.69812e-06	0.000112463	"DNA-directed RNA polymerase subunit beta (Protein of unknown function, DUF642)"	310	"gi|12321555|gb|AAG50831.1|AC074395_5unknown protein, 5' partial, partial [Arabidopsis thaliana]/gi|42572317|ref|NP_974254.1|DNA-directed RNA polymerase subunit beta (Protein of unknown function, DUF642) [Arabidopsis thaliana]/gi|332641112|gb|AEE74633.1|DNA-directed RNA polymerase subunit beta (Protein of unknown function, DUF642) [Arabidopsis thaliana]"	80.60%	NP_974254.1;AAG50831.1;AEE74633.1	extracellular region;plasma membrane;plant-type cell wall;plasmodesma;chloroplast	AT3G08030	80.8913	266	266	80.8913	contig_29087	0	310	74.8177	201	201	74.8177	contig_29087	0	310	80.1573	253	253	80.1573	contig_29087	0	310	78.6221	406.102	1108	1108	406.102	contig_29087	0	310	474.619	1151	1153	474.619
contig_1548	98.7003	37.8378	-95.9094	-5.03835	-95.9094	-5.03835	707.412	4.88759e-10	1.58161e-07	disease resistance RPP13 variant	1839	gi|374095384|sp|Q9SX38.2|DRL4_ARATHRecName: Full=Putative disease resistance protein At1g50180/gi|332194401|gb|AEE32522.1|NB-ARC domain-containing disease resistance protein [Arabidopsis thaliana]/gi|15222893|ref|NP_175437.1|NB-ARC domain-containing disease resistance protein [Arabidopsis thaliana]	52.90%	NP_175437.1;Q9SX38.2;AEE32522.1		AT1G50180	120.211	2345	2345	120.211	contig_1548	0	1839	121.163	1931	1931	121.163	contig_1548	0	1839	117.603	2202	2202	117.603	contig_1548	0	1839	119.659	25.8874	419	419	25.8874	contig_1548	0	1839	22.8986	330	330	22.8986
contig_12994	470.825	325.9	412.362	6.34451	412.362	6.34451	95.1416	1.34488e-06	2.67796e-05	AT5g25460 F18G18_200	376	"gi|12321555|gb|AAG50831.1|AC074395_5unknown protein, 5' partial, partial [Arabidopsis thaliana]/gi|42572317|ref|NP_974254.1|DNA-directed RNA polymerase subunit beta (Protein of unknown function, DUF642) [Arabidopsis thaliana]/gi|332641112|gb|AEE74633.1|DNA-directed RNA polymerase subunit beta (Protein of unknown function, DUF642) [Arabidopsis thaliana]"	73.00%	NP_974254.1;AAG50831.1;AEE74633.1	extracellular region;plasma membrane;plant-type cell wall;plasmodesma;chloroplast;root morphogenesis;response to karrikin	AT3G08030	88.7559	354	354	88.7559	contig_12994	0	376	69.0502	225	225	69.0502	contig_12994	0	376	73.6623	282	282	73.6623	contig_12994	0	376	77.1562	412.479	1365	1365	412.479	contig_12994	0	376	516.201	1521	1521	516.201
contig_16412	93.9973	48.7618	80.6139	25.8539	80.6139	25.8539	47.9973	1.84856e-05	0.000181214	---NA---	701						20.4413	152	152	20.4413	contig_16412	0	701	23.8682	145	145	23.8682	contig_16412	0	701	16.2527	116	116	16.2527	contig_16412	0	701	20.1874	3.40375	21	21	3.40375	contig_16412	0	701	2.36648	13	13	2.36648
contig_4514	313.881	258.037	-283.153	-4.37667	-283.153	-4.37667	112.105	7.10493e-07	1.70938e-05	receptor like 45	377	gi|17380976|gb|AAL36300.1|putative disease resistance protein [Arabidopsis thaliana]/gi|3033389|gb|AAC12833.1|putative disease resistance protein [Arabidopsis thaliana]/gi|330253947|gb|AEC09041.1|disease resistance family protein / LRR family protein [Arabidopsis thaliana]/gi|15226862|ref|NP_181039.1|disease resistance family protein / LRR family protein [Arabidopsis thaliana]/gi|13272423|gb|AAK1…	60.10%	AAL36300.1;AAC12833.1;AEC09041.1;NP_181039.1;AAK17150.1;AAM51244.1	cell wall;signal transduction;defense response to fungus	AT2G34930	374.587	1498	1498	374.587	contig_4514	0	377	357.803	1169	1169	357.803	contig_4514	0	377	368.637	1415	1415	368.637	contig_4514	0	377	367.009	182.938	606	607	182.938	contig_4514	0	377	212.905	629	629	212.905
contig_6920	76.5192	67.3814	72.396	7.74483	72.396	7.74483	502.62	1.90504e-09	3.74005e-07	multidrug resistance-associated 3	1616	gi|332641770|gb|AEE75291.1|multidrug resistance-associated protein 3 [Arabidopsis thaliana]/gi|30682473|ref|NP_850575.1|multidrug resistance-associated protein 3 [Arabidopsis thaliana]	81.00%	NP_850575.1;AEE75291.1	plant-type vacuole;ATP binding;vacuolar membrane;plasma membrane;xenobiotic-transporting ATPase activity;plasmodesma;chlorophyll catabolite transmembrane transporter activity;glutathione S-conjugate-exporting ATPase activity;integral component of membrane;apoplast;response to other organism;transmembrane transport	ABCC3	11.1423	191	191	11.1423	contig_6920	0	1616	14.1382	196	198	14.1382	contig_6920	0	1616	11.3046	183	186	11.3046	contig_6920	0	1616	12.195	9.84336	135	140	9.84336	contig_6920	0	1616	13.4241	170	170	13.4241
contig_22846	382.527	233.152	333.08	29.3081	333.08	29.3081	93.3231	1.44942e-06	2.83637e-05	CTP synthase family	750	"gi|110740212|dbj|BAF02004.1|CTP synthase like protein, partial [Arabidopsis thaliana]"	77.50%	BAF02004.1	CTP synthase activity;ATP binding;cytosol;embryo development ending in seed dormancy;'de novo' CTP biosynthetic process;response to cadmium ion		10.6841	85	85	10.6841	contig_22846	0	750	14.9238	97	97	14.9238	contig_22846	0	750	9.69069	74	74	9.69069	contig_22846	0	750	11.7662	392.218	2589	2589	392.218	contig_22846	0	750	299.113	1758	1758	299.113
contig_4288	176.769	80.4052	-145.117	-4.7234	-145.117	-4.7234	35.992	5.41568e-05	0.000402009	Curculin-like (mannose-binding) lectin family	521	gi|9802773|gb|AAF99842.1|AC051629_9Hypothetical protein [Arabidopsis thaliana]	63.70%	AAF99842.1	vacuolar membrane;Golgi apparatus;cytosol;plasma membrane;plant-type cell wall;plasmodesma;response to cytokinin;apoplast		195.058	1077	1078	195.058	contig_4288	0	521	208.855	942	943	208.855	contig_4288	0	521	148.362	784	787	148.362	contig_4288	0	521	184.091	37.9462	174	174	37.9462	contig_4288	0	521	32.0857	131	131	32.0857
contig_1676	304.418	233.828	-283.793	-6.11703	-283.793	-6.11703	301.749	1.44404e-08	1.30466e-06	zinc finger (CCCH-type) family	1743	gi|15225637|ref|NP_181543.1|zinc finger (CCCH-type) family protein [Arabidopsis thaliana]/gi|4587989|gb|AAD25930.1|AF085279_3hypothetical Cys-3-His zinc finger protein [Arabidopsis thaliana]/gi|75315011|sp|Q9XEE6.1|C3H29_ARATHRecName: Full=Zinc finger CCCH domain-containing protein 29 Short=AtC3H29 AltName: Full=AtSZF2/gi|79324795|ref|NP_001031517.1|zinc finger (CCCH-type) family protein [Arabido…	74.50%	Q9XEE6.1;AAM91337.1;NP_001031517.1;NP_181543.1;AEC09788.1;AEC09787.1;AAD25930.1;AAM13015.1	"DNA binding;transcription factor activity, sequence-specific DNA binding;nucleus;cytoplasm;regulation of transcription, DNA-templated;response to cold;response to chitin;metal ion binding;defense response to fungus"	CZF1	348.584	6445	6445	348.584	contig_1676	0	1743	310.29	4687	4687	310.29	contig_1676	0	1743	358.887	6369	6369	358.887	contig_1676	0	1743	339.254	55.0828	845	845	55.0828	contig_1676	0	1743	54.4695	744	744	54.4695
contig_8965	79.9621	37.5168	72.0856	8.18227	72.0856	8.18227	175.385	1.23076e-07	5.09707e-06	ubiquitin hydrolase	1222	gi|222423782|dbj|BAH19857.1|AT5G18310 [Arabidopsis thaliana]/gi|332005154|gb|AED92537.1|ubiquitin hydrolase [Arabidopsis thaliana]/gi|30686758|ref|NP_850843.1|ubiquitin hydrolase [Arabidopsis thaliana]	42.33%	AED92537.1;NP_850843.1;BAH19857.1		AT5G18310	10.1061	128	131	10.1061	contig_8965	0	1222	10.1982	108	108	10.1982	contig_8965	0	1222	9.80557	122	122	9.80557	contig_8965	0	1222	10.0366	41.3757	445	445	41.3757	contig_8965	0	1222	38.1153	365	365	38.1153
contig_7117	102.041	54.9173	87.4505	12.4081	87.4505	12.4081	54.5825	1.13671e-05	0.00012656	Plant stearoyl-acyl-carrier- desaturase family	669	gi|7523660|gb|AAF63100.1|AC006423_1Putative acyl-acyl carrier protein desaturase [Arabidopsis thaliana]	82.00%	AAF63100.1	unsaturated fatty acid biosynthetic process;chloroplast stroma;endosperm development;membrane;acyl-[acyl-carrier-protein] desaturase activity;metal ion binding;fatty acid homeostasis;oxidation-reduction process;regulation of endosperm development		5.35475	38	38	5.35475	contig_7117	0	669	7.07177	41	41	7.07177	contig_7117	0	669	10.5704	71	72	10.5704	contig_7117	0	669	7.66563	34.3069	202	202	34.3069	contig_7117	0	669	45.0156	236	236	45.0156
contig_12699	94.1604	38.1318	73.9908	4.36356	73.9908	4.36356	15.5514	0.00106142	0.00402786	cinnamyl alcohol dehydrogenase	544	gi|169635590|emb|CAP09678.1|cinnamyl alcohol dehydrogenase [Arabidopsis thaliana]	73.00%	CAP09678.1	nucleus;response to UV;response to wounding;response to fungus;phenylpropanoid metabolic process;4-coumarate-CoA ligase activity		77.289	283	446	77.289	contig_12699	0	544	67.6647	199	319	67.6647	contig_12699	0	544	57.9549	205	321	57.9549	contig_12699	0	544	67.6362	20.4684	56	98	20.4684	contig_12699	0	544	22.0499	55	94	22.0499
contig_7108	123.372	103.316	115.343	20.7232	115.343	20.7232	48.1595	1.82521e-05	0.000179457	GDSL-like Lipase Acylhydrolase superfamily	614	gi|1032280063|gb|OAO94391.1|hypothetical protein AXX17_AT5G13940 [Arabidopsis thaliana]	71.50%	OAO94391.1	cholinesterase activity;alpha-L-fucosidase activity;extracellular region;metabolic process;plant-type cell wall;plasmodesma;lipase activity		5.22027	34	34	5.22027	contig_7108	0	614	8.64489	45	46	8.64489	contig_7108	0	614	3.67912	23	23	3.67912	contig_7108	0	614	5.84809	14.0638	76	76	14.0638	contig_7108	0	614	20.783	93	100	20.783
contig_3341	85.2257	70.644	75.5753	13.2794	75.5753	13.2794	182.761	1.04655e-07	4.58696e-06	Glycosyl hydrolase family with chitinase insertion domain-containing	1188	gi|1032284079|gb|OAO98406.1|ChiC [Arabidopsis thaliana]	67.10%	OAO98406.1	extracellular region;cell wall;chitin catabolic process;chitin binding;endochitinase activity;response to salt stress;response to abscisic acid;response to jasmonic acid;exochitinase activity		6.9831	88	88	6.9831	contig_3341	0	1188	4.37085	45	45	4.37085	contig_3341	0	1188	7.10995	86	86	7.10995	contig_3341	0	1188	6.15463	10.6161	111	111	10.6161	contig_3341	0	1188	7.73381	72	72	7.73381
contig_12148	169.791	60.0966	-114.298	-6.22918	-114.298	-6.22918	18.136	0.000629471	0.00266027	OBP3-responsive 1	531	gi|227206318|dbj|BAH57214.1|AT5G53450 [Arabidopsis thaliana]	80.00%	BAH57214.1	cyclin-dependent protein serine/threonine kinase activity;nucleus;protein phosphorylation;regulation of mitotic cell cycle;regulation of gene expression		119.66	674	674	119.66	contig_12148	0	531	174.498	803	803	174.498	contig_12148	0	531	114.308	618	618	114.308	contig_12148	0	531	136.155	4.70744	22	22	4.70744	contig_12148	0	531	29.0783	121	121	29.0783
contig_10925	125.925	55.374	110.434	6.30206	110.434	6.30206	115.75	6.27163e-07	1.57419e-05	Major facilitator superfamily	2020	gi|75217952|sp|Q56XQ6.1|PTR15_ARATHRecName: Full=Protein NRT1/ PTR FAMILY 4.4 Short=AtNPF4.4 AltName: Full=Nitrate transporter 1.13/gi|332193474|gb|AEE31595.1|Major facilitator superfamily protein [Arabidopsis thaliana]/gi|42562490|ref|NP_174610.2|Major facilitator superfamily protein [Arabidopsis thaliana]/gi|62320582|dbj|BAD95216.1|nitrate transporter NTL1 [Arabidopsis thaliana]	66.80%	Q56XQ6.1;NP_174610.2;BAD95216.1;AEE31595.1	plasma membrane;oligopeptide transport;response to nematode;regulation of stomatal movement;abscisic acid transport;abscisic acid transporter activity	AT1G33440	18.2943	391	392	18.2943	contig_10925	0	2020	23.478	406	411	23.478	contig_10925	0	2020	20.713	420	426	20.713	contig_10925	0	2020	20.8284	144.219	2528	2564	144.219	contig_10925	0	2020	131.209	2060	2077	131.209
contig_8951	192.928	79.407	166.395	9.79316	166.395	9.79316	28.912	0.000120838	0.000739856	---NA---	554						130.007	764	764	130.007	contig_8951	0	554	83.5228	401	401	83.5228	contig_8951	0	554	101.408	572	572	101.408	contig_8951	0	554	104.979	19.0735	93	93	19.0735	contig_8951	0	554	23.2643	101	101	23.2643
contig_9646	91.198	43.0077	74.4932	11.4309	74.4932	11.4309	28.9365	0.000120466	0.000738005	Glucose-methanol-choline (GMC) oxidoreductase family	1330	gi|15219367|ref|NP_177448.1|Glucose-methanol-choline (GMC) oxidoreductase family protein [Arabidopsis thaliana]/gi|75207536|sp|Q9SSM2.1|MDLL_ARATHRecName: Full=(R)-mandelonitrile lyase-like AltName: Full=Hydroxynitrile lyase-like Short=(R)-oxynitrilase-like Flags: Precursor/gi|332197287|gb|AEE35408.1|Glucose-methanol-choline (GMC) oxidoreductase family protein [Arabidopsis thaliana]/gi|5903094|gb…	61.10%	NP_177448.1;AAD55652.1;Q9SSM2.1;AEE35408.1	catalytic activity;defense response;cell-cell signaling;embryo sac development;fatty acid omega-oxidation;cyanide biosynthetic process	AT1G73050	6.3793	90	90	6.3793	contig_9646	0	1330	7.80838	90	90	7.80838	contig_9646	0	1330	7.237	98	98	7.237	contig_9646	0	1330	7.14156	44.3376	519	519	44.3376	contig_9646	0	1330	66.9702	698	698	66.9702
contig_1653	91.5521	60.7862	72.957	10.0354	72.957	10.0354	60.1121	7.87436e-06	9.63277e-05	WRKY DNA-binding 57	1067	gi|9972360|gb|AAG10610.1|AC008030_10Hypothetical protein [Arabidopsis thaliana]	80.30%	AAG10610.1	"transcription factor activity, sequence-specific DNA binding;protein binding;nucleus;transcription, DNA-templated;response to water deprivation;response to nematode;response to salt stress;response to auxin;response to abscisic acid;vegetative to reproductive phase transition of meristem;defense response to bacterium;transcription regulatory region DNA binding;positive regulation of transcriptio…		7.42159	84	84	7.42159	contig_1653	0	1067	11.4634	106	106	11.4634	contig_1653	0	1067	5.33885	58	58	5.33885	contig_1653	0	1067	8.0746	12.9913	122	122	12.9913	contig_1653	0	1067	15.3082	128	128	15.3082
contig_26082	84.0343	36.5774	65.5398	5.33707	65.5398	5.33707	14.444	0.00135815	0.00489591	Cupredoxin superfamily	627	gi|20147265|gb|AAM10346.1|At2g15780/F19G14.22 [Arabidopsis thaliana]/gi|18397934|ref|NP_565380.1|Cupredoxin superfamily protein [Arabidopsis thaliana]/gi|15294186|gb|AAK95270.1|AF410284_1At2g15780/F19G14.22 [Arabidopsis thaliana]/gi|5306253|gb|AAD41986.1|expressed protein [Arabidopsis thaliana]/gi|330251343|gb|AEC06437.1|Cupredoxin superfamily protein [Arabidopsis thaliana]	55.50%	NP_565380.1;AAK95270.1;AAD41986.1;AAM10346.1;AEC06437.1		AT2G15780	17.5914	117	117	17.5914	contig_26082	0	627	21.1641	114	115	21.1641	contig_26082	0	627	6.57909	42	42	6.57909	contig_26082	0	627	15.1115	34.9741	193	193	34.9741	contig_26082	0	627	56.5789	277	278	56.5789
contig_17251	75.1589	65.1995	68.9127	6.88943	68.9127	6.88943	242.986	3.40247e-08	2.21204e-06	---NA---	368						10.2469	40	40	10.2469	contig_17251	0	368	15.9916	51	51	15.9916	contig_17251	0	368	10.1419	38	38	10.1419	contig_17251	0	368	12.1268	10.8063	35	35	10.8063	contig_17251	0	368	12.8301	37	37	12.8301
contig_1392	353.085	301.341	-319.549	-5.19988	-319.549	-5.19988	355.282	7.55781e-09	8.70216e-07	nucleotide sugar epimerase	2196	"gi|23198200|gb|AAN15627.1|nucleotide sugar epimerase-like protein [Arabidopsis thaliana]/gi|332660365|gb|AEE85765.1|UDP-D-glucuronate 4-epimerase 1 [Arabidopsis thaliana]/gi|15234745|ref|NP_194773.1|UDP-D-glucuronate 4-epimerase 1 [Arabidopsis thaliana]/gi|7269945|emb|CAB79762.1|nucleotide sugar epimerase-like protein [Arabidopsis thaliana]/gi|1032283457|gb|OAO97784.1|GAE1 [Arabidopsis thaliana]…	85.80%	CAB79762.1;AFI41204.1;AAT77233.1;NP_194773.1;Q9M0B6.1;AAN15627.1;AAM62729.1;AAM20706.1;AEE85765.1;AAL07152.1;OAO97784.1	protein binding;endosome;trans-Golgi network;nucleotide-sugar metabolic process;integral component of membrane;Golgi cisterna membrane;galacturonate biosynthetic process;UDP-glucuronate 4-epimerase activity;coenzyme binding;defense response to Gram-negative bacterium;defense response to fungus	GAE1	380.693	8868	8868	380.693	contig_1392	0	2196	389.102	7405	7405	389.102	contig_1392	0	2196	417.107	9326	9326	417.107	contig_1392	0	2196	395.634	122.416	2366	2366	122.416	contig_1392	0	2196	154.164	2653	2653	154.164
contig_1693	332.883	253.77	-308.899	-7.32947	-308.899	-7.32947	209.7	6.0875e-08	3.20897e-06	zinc finger (CCCH-type) family	673	gi|7573493|emb|CAB87852.1|putative protein [Arabidopsis thaliana]	72.20%	CAB87852.1	"transcription factor activity, sequence-specific DNA binding;binding;nucleus;cytoplasm;regulation of transcription, DNA-templated;response to cold;response to chitin;defense response to fungus"		374.706	2526	2675	374.706	contig_1693	0	673	319.253	1737	1862	319.253	contig_1693	0	673	379.148	2411	2598	379.148	contig_1693	0	673	357.702	50.4792	277	299	50.4792	contig_1693	0	673	46.265	229	244	46.265
contig_670	67.7823	16.5556	60.5893	4.16531	60.5893	4.16531	69.4117	4.54182e-06	6.4463e-05	4-cumarate-COA-	2179	gi|145324901|ref|NP_001077697.1|4-coumarate:CoA ligase 1 [Arabidopsis thaliana]/gi|332194579|gb|AEE32700.1|4-coumarate:CoA ligase 1 [Arabidopsis thaliana]	80.00%	NP_001077697.1;AEE32700.1	ATP binding;nucleus;cytoplasm;response to UV;response to wounding;response to fungus;phenylpropanoid metabolic process;4-coumarate-CoA ligase activity	4CL1	74.4138	1720	1720	74.4138	contig_670	0	2179	72.92	1377	1377	72.92	contig_670	0	2179	58.0554	1288	1288	58.0554	contig_670	0	2179	68.4631	15.9559	306	306	15.9559	contig_670	0	2179	18.74	320	320	18.74
contig_1385	83.7528	29.4894	63.1409	4.84265	63.1409	4.84265	16.0348	0.000957492	0.00371104	pyruvate decarboxylase	1544	gi|1032281653|gb|OAO95981.1|hypothetical protein AXX17_AT5G00350 [Arabidopsis thaliana]	89.40%	OAO95981.1	magnesium ion binding;response to hypoxia;pyruvate decarboxylase activity;cytosol;chloroplast;membrane;thiamine pyrophosphate binding;response to anoxia		12.9441	212	212	12.9441	contig_1385	0	1544	14.7228	196	197	14.7228	contig_1385	0	1544	21.628	339	340	21.628	contig_1385	0	1544	16.4316	65.9352	892	896	65.9352	contig_1385	0	1544	88.4329	1065	1070	88.4329
contig_11825	67.1951	23.418	61.87	4.55062	61.87	4.55062	124.442	4.72711e-07	1.29479e-05	WRKY DNA-binding 11	1343	gi|20978770|sp|O22176.1|WRK15_ARATHRecName: Full=Probable WRKY transcription factor 15 AltName: Full=WRKY DNA-binding protein 15/gi|13506743|gb|AAK28314.1|AF224704_1WRKY DNA-binding protein 15 [Arabidopsis thaliana]/gi|1032295019|gb|OAP09345.1|WRKY15 [Arabidopsis thaliana]/gi|17065604|gb|AAL33782.1|putative WRKY-type DNA-binding protein [Arabidopsis thaliana]/gi|2642432|gb|AAB87100.1|putative WRK…	74.40%	AAK28314.1;O22176.1;AAB87100.1;AAK44009.1;NP_179913.1;AAL33782.1;OAP09345.1;AEC07441.1	"transcription factor activity, sequence-specific DNA binding;calmodulin binding;nucleus;transcription, DNA-templated;regulation of transcription, DNA-templated;response to chitin;glucosinolate metabolic process;defense response to bacterium;sequence-specific DNA binding;transcription regulatory region DNA binding"	WRKY15	16.4958	235	235	16.4958	contig_11825	0	1343	18.301	213	213	18.301	contig_11825	0	1343	17.4786	239	239	17.4786	contig_11825	0	1343	17.4251	57.4448	679	679	57.4448	contig_11825	0	1343	65.2767	687	687	65.2767
contig_3775	163.409	68.8106	-139.095	-5.14214	-139.095	-5.14214	60.5799	7.64492e-06	9.43151e-05	mitogen-activated kinase 4	1463	gi|1032289375|gb|OAP03702.1|MPK3 [Arabidopsis thaliana]/gi|15231196|ref|NP_190150.1|mitogen-activated protein kinase 3 [Arabidopsis thaliana]/gi|6996267|emb|CAB75493.1|mitogen-activated protein kinase 3 [Arabidopsis thaliana]/gi|110741649|dbj|BAE98771.1|mitogen-activated protein kinase 3 [Arabidopsis thaliana]/gi|14423448|gb|AAK62406.1|AF386961_1mitogen-activated protein kinase 3 [Arabidopsis tha…	86.50%	AAN15326.1;AAK62406.1;NP_190150.1;Q39023.2;OAP03702.1;CAB75493.1;BAE98771.1;AEE78054.1	"MAPK cascade;activation of MAPK activity involved in osmosensory signaling pathway;cytokinesis by cell plate formation;MAP kinase activity;protein binding;ATP binding;nucleus;trans-Golgi network;cytosol;microtubule;hyperosmotic response;male meiosis cytokinesis;response to cold;cell plate;phragmoplast;pollen development;preprophase band;response to fungus;plant-type hypersensitive response;respo…		175.978	2730	2731	175.978	contig_3775	0	1463	146.151	1853	1853	146.151	contig_3775	0	1463	195.896	2918	2918	195.896	contig_3775	0	1463	172.675	32.929	424	424	32.929	contig_3775	0	1463	35.3255	405	405	35.3255
contig_1204	93.0972	40.4091	67.0206	6.65809	67.0206	6.65809	17.983	0.000648063	0.00272332	electron carrier disulfide oxidoreductase	2163	gi|1032284436|gb|OAO98763.1|hypothetical protein AXX17_AT4G09650 [Arabidopsis thaliana]	59.80%	OAO98763.1	nucleus;cellular process;single-organism process;regulation of cellular process		11.1575	256	256	11.1575	contig_1204	0	2163	12.1632	228	228	12.1632	contig_1204	0	2163	12.2146	269	269	12.2146	contig_1204	0	2163	11.8451	34.8793	664	664	34.8793	contig_1204	0	2163	40.2941	683	683	40.2941
contig_8356	149.503	109.579	-138.805	-15.1472	-138.805	-15.1472	178.373	1.1516e-07	4.89046e-06	---NA---	468						142.415	707	707	142.415	contig_8356	0	468	156.32	634	634	156.32	contig_8356	0	468	147.115	701	701	147.115	contig_8356	0	468	148.616	13.8384	57	57	13.8384	contig_8356	0	468	6.81666	25	25	6.81666
contig_4086	67.3857	53.4417	62.1201	4.7417	62.1201	4.7417	185.757	9.81656e-08	4.43499e-06	mevalonate kinase	933	gi|5578718|gb|AAD45421.1|L77688_1mevalonate kinase [Arabidopsis thaliana]	79.00%	AAD45421.1	"mevalonate kinase activity;ATP binding;cytosol;sterol biosynthetic process;phosphorylation;isopentenyl diphosphate biosynthetic process, mevalonate pathway"		16.975	155	168	16.975	contig_4086	0	933	18.3042	136	148	18.3042	contig_4086	0	933	14.5272	132	138	14.5272	contig_4086	0	933	16.6021	22.0421	177	181	22.0421	contig_4086	0	933	23.935	164	175	23.935
contig_20083	98.3119	40.1216	78.5902	7.64606	78.5902	7.64606	16.3484	0.000896827	0.003521	photoassimilate-responsive PAR	333	gi|1032276213|gb|OAO90541.1|hypothetical protein AXX17_AT5G51270 [Arabidopsis thaliana]/gi|21553901|gb|AAM62984.1|photoassimilate-responsive protein PAR-like protein [Arabidopsis thaliana]	65.60%	OAO90541.1;AAM62984.1			13.8718	49	49	13.8718	contig_20083	0	333	10.3955	30	30	10.3955	contig_20083	0	333	11.2079	38	38	11.2079	contig_20083	0	333	11.8251	93.1483	273	273	93.1483	contig_20083	0	333	84.6887	221	221	84.6887
contig_9430	179.955	90.5711	130.372	4.03686	130.372	4.03686	27.6832	0.00014142	0.000834503	Heat shock 70 (Hsp 70) family	514	"gi|6746590|gb|AAF27638.1|AF217458_1heat shock protein 70 [Arabidopsis thaliana]/gi|7671430|emb|CAB89371.1|heat shock protein 70 (Hsc70-5) [Arabidopsis thaliana]/gi|332004030|gb|AED91413.1|mitochondrial HSO70 2 [Arabidopsis thaliana]/gi|15242459|ref|NP_196521.1|mitochondrial HSO70 2 [Arabidopsis thaliana]/gi|75311081|sp|Q9LDZ0.1|HSP7J_ARATHRecName: Full=Heat shock 70 kDa protein 10, mitochondrial…	84.90%	AAF27638.1;Q9LDZ0.1;CAB89371.1;NP_196521.1;ACI49796.1;AED91413.1	ATP binding;cell wall;nucleolus;mitochondrial matrix;vacuolar membrane;endoplasmic reticulum lumen;Golgi apparatus;cytosol;plasma membrane;protein folding;zinc ion binding;response to heat;plasmodesma;chloroplast;response to virus;response to salt stress;response to cytokinin;polar nucleus fusion;mediator complex;response to endoplasmic reticulum stress;response to cadmium ion;unfolded protein bi…	MTHSC70-2	48.6032	239	265	48.6032	contig_9430	0	514	49.6134	208	221	49.6134	contig_9430	0	514	30.5732	155	160	30.5732	contig_9430	0	514	42.93	152.747	636	691	152.747	contig_9430	0	514	210.528	770	848	210.528
contig_8710	88.0837	64.4355	77.4201	289.408	77.4201	289.408	131.608	3.79766e-07	1.13617e-05	pathogenesis-related family	916	gi|1039008969|gb|ANM59053.1|pathogenesis-related family protein [Arabidopsis thaliana]/gi|1039008970|gb|AEE36151.2|pathogenesis-related family protein [Arabidopsis thaliana]/gi|1063696032|ref|NP_001321447.1|pathogenesis-related family protein [Arabidopsis thaliana]/gi|1063678582|ref|NP_001319407.1|pathogenesis-related family protein [Arabidopsis thaliana]	65.00%	ANM59053.1;NP_001319407.1;AEE36151.2;NP_001321447.1		AT1G78780	0.617501	6	6	0.617501	contig_8710	0	916	0.503889	4	4	0.503889	contig_8710	0	916	0.214446	2	2	0.214446	contig_8710	0	916	0.445279	0.24808	2	2	0.24808	contig_8710	0	916	0.55724	4	4	0.55724
contig_8388	80.7265	28.2832	69.6386	4.18297	69.6386	4.18297	31.5695	8.77113e-05	0.000580374	cinnamyl alcohol dehydrogenase	522	gi|169635590|emb|CAP09678.1|cinnamyl alcohol dehydrogenase [Arabidopsis thaliana]	73.70%	CAP09678.1	nucleus;response to UV;response to wounding;response to fungus;phenylpropanoid metabolic process;4-coumarate-CoA ligase activity		72.7808	265	403	72.7808	contig_8388	0	522	76.4849	212	346	76.4849	contig_8388	0	522	54.3765	190	289	54.3765	contig_8388	0	522	67.8807	20.2427	53	93	20.2427	contig_8388	0	522	20.2901	47	83	20.2901
contig_7642	717.27	613.402	-673.226	-10.9721	-673.226	-10.9721	340.253	8.97122e-09	9.87378e-07	basic endochitinase	609	"gi|12083324|gb|AAG48821.1|AF332458_1putative class I chitinase [Arabidopsis thaliana]/gi|1032300952|gb|OAP15277.1|POM1 [Arabidopsis thaliana]/gi|17226329|gb|AAL37736.1|AF422178_1chitinase-like protein 1 [Arabidopsis thaliana]/gi|21280935|gb|AAM44973.1|putative class I chitinase [Arabidopsis thaliana]/gi|75191903|sp|Q9MA41.1|CTL1_ARATHRecName: Full=Chitinase-like protein 1 Short=AtCTL1 AltName: F…	68.20%	NP_172076.1;AAG48821.1;AAM44973.1;AAK59442.1;OAP15277.1;AAL37737.1;ANM59031.1;NP_001321426.1;AAL37736.1;AAF29391.1;AEE27904.1;Q9MA41.1	"chitinase activity;vacuolar membrane;Golgi apparatus;cytosol;plasma membrane;chitin catabolic process;response to heat;response to water deprivation;response to salt stress;response to cytokinin;lignin biosynthetic process;multidimensional cell growth;jasmonic acid and ethylene-dependent systemic resistance, ethylene mediated signaling pathway;root epidermal cell differentiation;response to nitr…	POM1	768.571	4965	4965	768.571	contig_7642	0	609	688.554	3634	3634	688.554	contig_7642	0	609	765.088	4744	4744	765.088	contig_7642	0	609	740.738	179.293	961	961	179.293	contig_7642	0	609	167.21	798	798	167.21
contig_13008	177.936	86.1157	154.509	39.5658	154.509	39.5658	35.2496	5.84914e-05	0.000425076	FANTASTIC four (DUF3049)	911	gi|38564296|gb|AAR23727.1|At5g19260 [Arabidopsis thaliana]/gi|75127072|sp|Q6NMR8.1|FAF3_ARATHRecName: Full=Protein FANTASTIC FOUR 3/gi|15239688|ref|NP_197427.1|FANTASTIC four-like protein (DUF3049) [Arabidopsis thaliana]/gi|1032276468|gb|OAO90796.1|FAF3 [Arabidopsis thaliana]/gi|332005294|gb|AED92677.1|FANTASTIC four-like protein (DUF3049) [Arabidopsis thaliana]/gi|44022143|gb|AAS46641.1|At5g1926…	50.50%	NP_197427.1;Q6NMR8.1;AAS46641.1;AAR23727.1;AED92677.1;OAO90796.1		FAF3	4.34623	42	42	4.34623	contig_13008	0	911	5.19321	41	41	5.19321	contig_13008	0	911	2.47967	23	23	2.47967	contig_13008	0	911	4.00637	135.447	1086	1086	135.447	contig_13008	0	911	180.416	1288	1288	180.416
contig_10115	251.219	208.538	-203.006	-4.02149	-203.006	-4.02149	43.4217	2.69348e-05	0.000240185	SKU5 similar 5	1699	gi|332197683|gb|AEE35804.1|SKU5 similar 5 [Arabidopsis thaliana]/gi|222423158|dbj|BAH19558.1|AT1G76160 [Arabidopsis thaliana]/gi|15222981|ref|NP_177743.1|SKU5 similar 5 [Arabidopsis thaliana]/gi|6573725|gb|AAF17645.1|AC009978_21T23E18.10 [Arabidopsis thaliana]/gi|1032304192|gb|OAP18517.1|sks5 [Arabidopsis thaliana]	84.40%	AAF17645.1;OAP18517.1;NP_177743.1;BAH19558.1;AEE35804.1	"copper ion binding;cytosol;plant-type cell wall;plasmodesma;membrane;oxidoreductase activity, oxidizing metal ions;pectinesterase activity;apoplast;oxidation-reduction process"	sks5	288.697	5203	5203	288.697	contig_10115	0	1699	222.563	3277	3277	222.563	contig_10115	0	1699	269.85	4668	4668	269.85	contig_10115	0	1699	260.37	218.28	3264	3264	218.28	contig_10115	0	1699	310.795	4138	4138	310.795
contig_1284	576.053	541.908	-558.677	-8.36998	-558.677	-8.36998	849.608	2.35567e-10	1.07812e-07	glutamate decarboxylase	1338	gi|332642482|gb|AEE76003.1|glutamate decarboxylase 5 [Arabidopsis thaliana]/gi|9294589|dbj|BAB02870.1|glutamate decarboxylase [Arabidopsis thaliana]/gi|238479801|ref|NP_001154621.1|glutamate decarboxylase 5 [Arabidopsis thaliana]/gi|1032290832|gb|OAP05159.1|GAD5 [Arabidopsis thaliana]/gi|15229517|ref|NP_188403.1|glutamate decarboxylase 5 [Arabidopsis thaliana]/gi|332642483|gb|AEE76004.1|glutamate…	90.60%	NP_188403.1;BAB02870.1;AEE76003.1;AEE76004.1;Q9LSH2.1;OAP05159.1;NP_001154621.1	glutamate decarboxylase activity;calmodulin binding;nucleus;cytosol;glutamate metabolic process;plasmodesma;pyridoxal phosphate binding;response to cadmium ion	GAD5	640.739	9094	9094	640.739	contig_1284	0	1338	641.547	7439	7439	641.547	contig_1284	0	1338	621.157	8462	8462	621.157	contig_1284	0	1338	634.481	163.213	1922	1922	163.213	contig_1284	0	1338	141.818	1487	1487	141.818
contig_29109	96.0558	60.2077	68.1903	9.71141	68.1903	9.71141	10.2294	0.00410948	0.0118828	basic endochitinase	302	gi|5689118|dbj|BAA82818.1|basic endochitinase [Arabidopsis thaliana]	50.00%	BAA82818.1			9.05259	25	29	9.05259	contig_29109	0	302	9.5522	18	25	9.5522	contig_29109	0	302	4.8783	10	15	4.8783	contig_29109	0	302	7.8277	6.01963	5	16	6.01963	contig_29109	0	302	10.141	17	24	10.141
contig_23844	277.761	178.198	247.821	21.9175	247.821	21.9175	121.234	5.23487e-07	1.38715e-05	CTP synthase family	332	"gi|11994408|dbj|BAB02410.1|CTP synthase [Arabidopsis thaliana]/gi|30725394|gb|AAP37719.1|At3g12670 [Arabidopsis thaliana]/gi|20260422|gb|AAM13109.1|CTP-synthetase, putative [Arabidopsis thaliana]/gi|1032289517|gb|OAP03844.1|emb2742 [Arabidopsis thaliana]/gi|15230562|ref|NP_187873.1|CTP synthase family protein [Arabidopsis thaliana]/gi|12321972|gb|AAG51029.1|AC069474_28CTP-synthetase, putative 37…	88.80%	NP_187873.1;AAP37719.1;AAG51029.1;AEE75230.1;AAM13109.1;OAP03844.1;BAB02410.1	CTP synthase activity;ATP binding;cytosol;embryo development ending in seed dormancy;'de novo' CTP biosynthetic process;response to cadmium ion	emb2742	9.37039	33	33	9.37039	contig_23844	0	332	12.8598	37	37	12.8598	contig_23844	0	332	13.3125	42	45	13.3125	contig_23844	0	332	11.8476	287.131	782	839	287.131	contig_23844	0	332	235.998	553	614	235.998
contig_16532	297.444	130.983	201.687	4.85398	201.687	4.85398	19.3781	0.000500756	0.00221663	"beta-1,3-glucanase"	367	gi|1032286987|gb|OAP01314.1|BG3 [Arabidopsis thaliana]	77.40%	OAP01314.1	"glucan exo-1,3-beta-glucosidase activity;protein binding;cell wall;vacuole;endoplasmic reticulum;carbohydrate metabolic process;cellulase activity;response to cold;chloroplast;response to bacterium;systemic acquired resistance;polysaccharide binding;glucan endo-1,3-beta-D-glucosidase activity;anchored component of plasma membrane;apoplast"		75.5202	294	294	75.5202	contig_16532	0	367	76.403	243	243	76.403	contig_16532	0	367	73.3278	274	274	73.3278	contig_16532	0	367	75.0837	81.4229	263	263	81.4229	contig_16532	0	367	34.4228	99	99	34.4228
contig_32221	590.923	438.498	547.357	16.7556	547.357	16.7556	164.595	1.5798e-07	5.98938e-06	expansin A1	485	"gi|1041702|gb|AAB38070.1|expansin At-EXPA1, partial [Arabidopsis thaliana]"	92.60%	AAB38070.1	structural constituent of cell wall;extracellular region;syncytium formation;plant-type cell wall;response to gibberellin;unidimensional cell growth;plant-type cell wall loosening;plant-type cell wall modification involved in multidimensional cell growth;response to red light;regulation of stomatal movement;integral component of membrane		38.4862	184	198	38.4862	contig_32221	0	485	32.119	118	135	32.119	contig_32221	0	485	33.6164	156	166	33.6164	contig_32221	0	485	34.7405	503.679	1977	2150	503.679	contig_32221	0	485	623.042	2168	2368	623.042
contig_21054	81.5597	45.0287	77.0601	521.186	77.0601	521.186	28.276	0.000130985	0.000787121	"imidazolonepropionase (Protein of unknown function, DUF642)"	442	"gi|330254941|gb|AEC10035.1|imidazolonepropionase (Protein of unknown function, DUF642) [Arabidopsis thaliana]/gi|26450362|dbj|BAC42297.1|unknown protein [Arabidopsis thaliana]/gi|15227439|ref|NP_181712.1|imidazolonepropionase (Protein of unknown function, DUF642) [Arabidopsis thaliana]/gi|29824131|gb|AAP04026.1|unknown protein [Arabidopsis thaliana]/gi|2335098|gb|AAC02767.1|unknown protein [Arab…	70.00%	OAP08274.1;AEC10035.1;AAC02767.1;AAP04026.1;BAC42297.1;NP_181712.1	extracellular region;plasma membrane;plant-type cell wall;plasmodesma;chloroplast	AT2G41810	0	0	0	0	contig_21054	0	442	0	0	0	0	contig_21054	0	442	0.444418	2	2	0.444418	contig_21054	0	442	0.148139	79.4315	309	309	79.4315	contig_21054	0	442	75.0635	260	260	75.0635
contig_3350	89.6329	60.9619	69.241	5.22757	69.241	5.22757	25.1435	0.000199902	0.00108771	S-adenosyl-L-methionine-dependent methyltransferases superfamily	441	gi|3894186|gb|AAC78535.1|putative embryo-abundant protein [Arabidopsis thaliana]/gi|15227331|ref|NP_181669.1|S-adenosyl-L-methionine-dependent methyltransferases superfamily protein [Arabidopsis thaliana]/gi|18252865|gb|AAL62359.1|putative embryo-abundant protein [Arabidopsis thaliana]/gi|30023764|gb|AAP13415.1|At2g41380 [Arabidopsis thaliana]/gi|1032294803|gb|OAP09129.1|hypothetical protein AXX1…	52.60%	AAP13415.1;NP_181669.1;AAC78535.1;AAL62359.1;OAP09129.1;AEC09967.1	nucleus;mitochondrion;cytosol;single-multicellular organism process;response to cadmium ion	AT2G41380	15.3913	69	72	15.3913	contig_3350	0	441	21.7175	83	83	21.7175	contig_3350	0	441	12.0265	54	54	12.0265	contig_3350	0	441	16.3784	27.8254	107	108	27.8254	contig_3350	0	441	30.3828	98	105	30.3828
contig_7067	209.046	77.2362	173.262	6.94018	173.262	6.94018	23.2923	0.000262536	0.00133871	heat shock 60-2	715	"gi|34098917|gb|AAQ56841.1|At3g23990 [Arabidopsis thaliana]/gi|332643321|gb|AEE76842.1|heat shock protein 60 [Arabidopsis thaliana]/gi|9294668|dbj|BAB03017.1|chaperonin hsp60, mitochondrial precursor (HSP60) [Arabidopsis thaliana]/gi|12644189|sp|P29197.2|CH60A_ARATHRecName: Full=Chaperonin CPN60, mitochondrial AltName: Full=HSP60 Flags: Precursor/gi|20466256|gb|AAM20445.1|mitochondrial chaperonin…	85.20%	AAQ56841.1;NP_189041.1;AAM20445.1;BAB03017.1;OAP03825.1;P29197.2;AEE76842.1	copper ion binding;ATP binding;mitochondrial matrix;vacuolar membrane;Golgi apparatus;plasma membrane;'de novo' protein folding;inflammatory response;response to heat;chloroplast stroma;response to cytokinin;chloroplast envelope;cytosolic ribosome;protein refolding;protein binding involved in protein folding;protein import into mitochondrial intermembrane space;response to cadmium ion;unfolded pr…	HSP60	29.666	222	225	29.666	contig_7067	0	715	30.5018	189	189	30.5018	contig_7067	0	715	27.3358	199	199	27.3358	contig_7067	0	715	29.1679	143.178	897	901	143.178	contig_7067	0	715	227.731	1270	1276	227.731
contig_1418	167.561	103.481	142.924	4.62429	142.924	4.62429	104.427	9.36578e-07	2.05899e-05	SIGNAL PEPTIDE PEPTIDASE-LIKE 4	2226	gi|12324949|gb|AAG52428.1|AC011622_16unknown protein 50290-46846 [Arabidopsis thaliana]	75.60%	AAG52428.1	"lysosomal membrane;plasma membrane;signal peptide processing;endosome membrane;Golgi-associated vesicle membrane;membrane protein proteolysis;aspartic endopeptidase activity, intramembrane cleaving;integral component of cytoplasmic side of endoplasmic reticulum membrane;integral component of lumenal side of endoplasmic reticulum membrane"		41.1222	971	971	41.1222	contig_1418	0	2226	39.8113	767	768	39.8113	contig_1418	0	2226	37.3717	847	847	37.3717	contig_1418	0	2226	39.435	168.848	3306	3308	168.848	contig_1418	0	2226	173.297	3021	3023	173.297
contig_3278	70.3714	42.6467	57.7318	4.38138	57.7318	4.38138	35.5083	5.69334e-05	0.000416479	LOB domain-containing 41	1008	gi|27805498|sp|Q9M886.1|LBD41_ARATHRecName: Full=LOB domain-containing protein 41 AltName: Full=ASYMMETRIC LEAVES 2-like protein 38 Short=AS2-like protein 38/gi|6957718|gb|AAF32462.1|unknown protein [Arabidopsis thaliana]/gi|18396229|ref|NP_566175.1|LOB domain-containing protein 41 [Arabidopsis thaliana]/gi|332640306|gb|AEE73827.1|LOB domain-containing protein 41 [Arabidopsis thaliana]/gi|1969932…	81.50%	AAF32462.1;AEE73827.1;Q9M886.1;AAL38040.1;AAL91273.1;BAH10582.1;NP_566175.1;AAM67429.1	"nucleus;regulation of transcription, DNA-templated;response to gibberellin"	LBD41	14.2156	152	152	14.2156	contig_3278	0	1008	15.5686	136	136	15.5686	contig_3278	0	1008	21.4361	220	220	21.4361	contig_3278	0	1008	17.0734	34.4919	306	306	34.4919	contig_3278	0	1008	48.8657	386	386	48.8657
contig_21879	125.86	41.2464	109.228	61.4093	109.228	61.4093	59.7693	8.04795e-06	9.76617e-05	NAC domain containing 71	1855	gi|1063723356|ref|NP_001329603.1|NAC domain containing protein 71 [Arabidopsis thaliana]/gi|1039018533|gb|ANM67800.1|NAC domain containing protein 71 [Arabidopsis thaliana]/gi|1128508114|dbj|BAW35238.1|NAC domain containing protein 71 [Arabidopsis thaliana]	68.90%	BAW35238.1;ANM67800.1;NP_001329603.1	"transcription factor activity, sequence-specific DNA binding;nucleus;transcription, DNA-templated;regulation of transcription, DNA-templated;multicellular organism development;cell proliferation;sequence-specific DNA binding;cellular response to auxin stimulus;sieve element enucleation"	NAC071	1.82953	35	36	1.82953	contig_21879	0	1855	1.74174	28	28	1.74174	contig_21879	0	1855	1.85314	35	35	1.85314	contig_21879	0	1855	1.80814	100.145	1627	1635	100.145	contig_21879	0	1855	99.3347	1438	1444	99.3347
contig_225	139.846	107.888	-126.196	-4.22217	-126.196	-4.22217	145.264	2.57984e-07	8.47961e-06	Disease resistance (CC-NBS-LRR class) family	397	"gi|32453386|gb|AAP82824.1|resistance protein RPP8-like protein, partial [Arabidopsis thaliana]"	60.40%	AAP82824.1			160.286	645	675	160.286	contig_225	0	397	165.093	531	568	165.093	contig_225	0	397	170.704	646	690	170.704	contig_225	0	397	165.361	33.7713	108	118	33.7713	contig_225	0	397	30.8573	90	96	30.8573
contig_5626	89.0628	42.3485	75.0847	5.19412	75.0847	5.19412	21.5479	0.00034564	0.0016542	sequence-specific DNA binding transcription factor	648	gi|6143872|gb|AAF04419.1|AC010927_12unknown protein [Arabidopsis thaliana]	92.67%	AAF04419.1	"transcription factor activity, sequence-specific DNA binding;protein binding;nucleus;plasma membrane;regulation of transcription, DNA-templated;negative regulation of gene expression;regulation of cellular response to hypoxia"		15.5665	102	107	15.5665	contig_5626	0	648	13.8896	75	78	13.8896	contig_5626	0	648	24.251	152	160	24.251	contig_5626	0	648	17.9024	49.972	265	285	49.972	contig_5626	0	648	64.1978	294	326	64.1978
contig_15591	189.718	100.952	180.151	122.82	180.151	122.82	197.889	7.65084e-08	3.75044e-06	cytokinin oxidase	748	gi|1063741700|ref|NP_001331716.1|cytokinin oxidase 3 [Arabidopsis thaliana]/gi|1039021059|gb|ANM70081.1|cytokinin oxidase 3 [Arabidopsis thaliana]	68.70%	ANM70081.1;NP_001331716.1	extracellular region;vacuole;endoplasmic reticulum lumen;primary amine oxidase activity;cytokinin catabolic process;cytokinin dehydrogenase activity;oxidation-reduction process	CKX3	1.76445	14	14	1.76445	contig_15591	0	748	0.308531	2	2	0.308531	contig_15591	0	748	2.3635	18	18	2.3635	contig_15591	0	748	1.47882	167.545	1103	1103	167.545	contig_15591	0	748	187.317	1098	1098	187.317
contig_387	389.923	341.449	-365.174	-6.06086	-365.174	-6.06086	369.634	6.45883e-09	7.66617e-07	cellulose synthase catalytic subunit	1494	"gi|110738824|dbj|BAF01335.1|cellulose synthase, partial [Arabidopsis thaliana]"	74.10%	BAF01335.1	RNA polymerase II regulatory region sequence-specific DNA binding;protein binding;endosome;trans-Golgi network;integral component of plasma membrane;multidimensional cell growth;plant-type primary cell wall biogenesis;mucilage biosynthetic process;seed coat development;cellulose synthase (UDP-forming) activity;cellulose biosynthetic process;hyperosmotic salinity response;cortical microtubule orga…		415.768	6589	6589	415.768	contig_387	0	1494	454.843	5889	5889	454.843	contig_387	0	1494	441.382	6713	6714	441.382	contig_387	0	1494	437.331	130.124	1711	1711	130.124	contig_387	0	1494	135.722	1589	1589	135.722
contig_3122	291.356	174.247	-224.359	-4.01979	-224.359	-4.01979	46.9337	2.01134e-05	0.000192698	oxophytodienoate-reductase 3	452	gi|10242314|gb|AAG15379.1|AF293653_112-oxo-phytodienoate reductase [Arabidopsis thaliana]	81.80%	AAG15379.1	NADPH dehydrogenase activity;peroxisome;cytosol;response to wounding;response to fungus;jasmonic acid biosynthetic process;response to salicylic acid;leaf senescence;FMN binding;response to ozone;12-oxophytodienoate reductase activity;oxylipin biosynthetic process;response to cadmium ion;oxidation-reduction process		293.452	1407	1407	293.452	contig_3122	0	452	253.757	994	994	253.757	contig_3122	0	452	348.755	1603	1605	348.755	contig_3122	0	452	298.655	94.7675	377	377	94.7675	contig_3122	0	452	85.2601	302	302	85.2601
contig_7494	94.3935	27.6375	84.6681	5.78808	84.6681	5.78808	69.0683	4.62907e-06	6.53802e-05	DNA ligase	300	gi|1039008122|gb|AEE35677.2|DNA ligase-like protein [Arabidopsis thaliana]/gi|1063678416|ref|NP_001319384.1|DNA ligase-like protein [Arabidopsis thaliana]	79.00%	AEE35677.2;NP_001319384.1		AT1G75150	19.7971	63	63	19.7971	contig_7494	0	300	18.8471	49	49	18.8471	contig_7494	0	300	14.4051	44	44	14.4051	contig_7494	0	300	17.6831	75.3683	199	199	75.3683	contig_7494	0	300	79.1169	185	186	79.1169
contig_4889	76.2119	55.756	66.9872	10.8605	66.9872	10.8605	113.573	6.75371e-07	1.65852e-05	FAD-binding Berberine family	1351	gi|1032282842|gb|OAO97169.1|hypothetical protein AXX17_AT4G24150 [Arabidopsis thaliana]	73.10%	OAO97169.1	electron carrier activity;plant-type cell wall;chloroplast;response to salt stress		9.48999	136	136	9.48999	contig_4889	0	1351	9.73688	114	114	9.73688	contig_4889	0	1351	5.23433	72	72	5.23433	contig_4889	0	1351	8.15373	6.55988	78	78	6.55988	contig_4889	0	1351	6.4229	68	68	6.4229
contig_28222	76.2697	46.283	62.4273	6.54526	62.4273	6.54526	50.0392	1.57965e-05	0.000160215	basic leucine-zipper 42	521	"gi|15230797|ref|NP_189674.1|basic leucine-zipper 42 [Arabidopsis thaliana]/gi|9279562|dbj|BAB01020.1|unnamed protein product [Arabidopsis thaliana]/gi|1032291976|gb|OAP06303.1|bZIP42 [Arabidopsis thaliana]/gi|332644128|gb|AEE77649.1|basic leucine-zipper 42 [Arabidopsis thaliana]/gi|225898689|dbj|BAH30475.1|hypothetical protein, partial [Arabidopsis thaliana]"	82.50%	OAP06303.1;BAB01020.1;NP_189674.1;AEE77649.1;BAH30475.1	"transcription factor activity, sequence-specific DNA binding;nucleus;transcription, DNA-templated;regulation of transcription, DNA-templated;protein homodimerization activity;sequence-specific DNA binding;protein heterodimerization activity"	bZIP42	7.59965	42	42	7.59965	contig_28222	0	521	13.7317	62	62	13.7317	contig_28222	0	521	12.442	66	66	12.442	contig_28222	0	521	11.2578	8.50518	39	39	8.50518	contig_28222	0	521	12.9812	53	53	12.9812
contig_9569	128.777	74.5761	108.399	5.36146	108.399	5.36146	31.5964	8.74377e-05	0.000579514	expansin x6	1675	gi|15225530|ref|NP_181500.1|expansin A4 [Arabidopsis thaliana]/gi|20259980|gb|AAM13337.1|putative expansin [Arabidopsis thaliana]/gi|2795809|gb|AAB97125.1|putative expansin [Arabidopsis thaliana]/gi|15294172|gb|AAK95263.1|AF410277_1At2g39700/F17A14.7 [Arabidopsis thaliana]/gi|330254614|gb|AEC09708.1|expansin A4 [Arabidopsis thaliana]/gi|1032294751|gb|OAP09077.1|EXPA4 [Arabidopsis thaliana]/gi|170…	89.50%	O48818.1;AAM13337.1;AAL32761.1;NP_181500.1;AAK95263.1;AEC09708.1;OAP09077.1;AAB97125.1	extracellular region;cytosol;syncytium formation;plant-type cell wall;plasmodesma;chloroplast;response to gibberellin;unidimensional cell growth;plant-type cell wall loosening;plant-type cell wall modification involved in multidimensional cell growth;response to red light;lateral root formation;membrane	EXPA4	24.5951	437	437	24.5951	contig_9569	0	1675	22.1137	321	321	22.1137	contig_9569	0	1675	27.8524	475	475	27.8524	contig_9569	0	1675	24.8537	125.22	1845	1846	125.22	contig_9569	0	1675	123.646	1623	1623	123.646
contig_10525	489.685	369.817	-436.126	-6.96568	-436.126	-6.96568	99.5558	1.12774e-06	2.35535e-05	Pectinacetylesterase family	597	gi|1063723626|ref|NP_001328920.1|Pectinacetylesterase family protein [Arabidopsis thaliana]/gi|1039017721|gb|ANM67068.1|Pectinacetylesterase family protein [Arabidopsis thaliana]	77.10%	NP_001328920.1;ANM67068.1	extracellular region;cytosol;plasma membrane;plant-type cell wall;plasmodesma;pectin acetylesterase activity;cell wall organization	AT4G19420	514.468	3253	3258	514.468	contig_10525	0	597	467.361	2416	2418	467.361	contig_10525	0	597	545.866	3310	3318	545.866	contig_10525	0	597	509.232	130.178	684	684	130.178	contig_10525	0	597	145.349	679	680	145.349
contig_1169	93.8047	23.2437	66.9205	11.9713	66.9205	11.9713	15.2713	0.00112811	0.00422098	terpene synthase 21	776	gi|1032281785|gb|OAO96113.1|hypothetical protein AXX17_AT5G23600 [Arabidopsis thaliana]	63.80%	OAO96113.1	cytoplasm;sesquiterpenoid biosynthetic process;sesquiterpene biosynthetic process;(-)-E-beta-caryophyllene synthase activity;alpha-humulene synthase activity;response to herbivore		59.5273	490	490	59.5273	contig_1169	0	776	47.435	318	319	47.435	contig_1169	0	776	51.0067	401	403	51.0067	contig_1169	0	776	52.6564	12.8848	88	88	12.8848	contig_1169	0	776	3.12442	18	19	3.12442
contig_5828	82.2604	61.5069	72.6927	245.8	72.6927	245.8	104.688	9.27543e-07	2.04524e-05	alpha dioxygenase	894	gi|1032288019|gb|OAP02346.1|PADOX-1 [Arabidopsis thaliana]	80.50%	OAP02346.1	"fatty acid alpha-oxidation;peroxidase activity;extracellular region;plant-type hypersensitive response;systemic acquired resistance;response to abscisic acid;leaf senescence;monolayer-surrounded lipid storage body;oxidoreductase activity, acting on single donors with incorporation of molecular oxygen, incorporation of two atoms of oxygen;heme binding;oxylipin biosynthetic process;defense respons…		0.632697	6	6	0.632697	contig_5828	0	894	0.258144	2	2	0.258144	contig_5828	0	894	0	0	0	0	contig_5828	0	894	0.296947	6.35461	50	50	6.35461	contig_5828	0	894	11.5618	81	81	11.5618
contig_152	100.979	31.1531	-79.9795	-4.725	-79.9795	-4.725	15.5271	0.001067	0.00404233	Fe(II) transport	2830	gi|3252868|gb|AAC24198.1|putative zinc transporter [Arabidopsis thaliana]/gi|1032278256|gb|OAO92584.1|ZIP2 [Arabidopsis thaliana]	65.00%	AAC24198.1;OAO92584.1	"protein polyubiquitination;copper ion transmembrane transporter activity;zinc ion transmembrane transporter activity;nucleus;endoplasmic reticulum;plasma membrane;zinc ion binding;response to water deprivation;response to salt stress;response to abscisic acid;positive regulation of abscisic acid-activated signaling pathway;integral component of membrane;transferase activity, transferring glycosy…		110.028	3303	3303	110.028	contig_152	0	2830	74.9019	1837	1837	74.9019	contig_152	0	2830	119.421	3441	3441	119.421	contig_152	0	2830	101.451	25.4542	634	634	25.4542	contig_152	0	2830	20.5165	455	455	20.5165
contig_2383	94.5185	65.1696	81.4844	21.5313	81.4844	21.5313	28.5443	0.000126579	0.000766096	RCD one 3	1392	gi|15450639|gb|AAK96591.1|AT5g62520/K19B1_13 [Arabidopsis thaliana]/gi|17386160|gb|AAL38626.1|AF446893_1AT5g62520/K19B1_13 [Arabidopsis thaliana]/gi|75171056|sp|Q9FJJ3.1|SRO5_ARATHRecName: Full=Probable inactive poly [ADP-ribose] polymerase SRO5 AltName: Full=Protein SIMILAR TO RCD ONE 5/gi|332010235|gb|AED97618.1|similar to RCD one 5 [Arabidopsis thaliana]/gi|10178083|dbj|BAB11502.1|unnamed prot…	58.40%	AAL38626.1;Q9FJJ3.1;BAB11502.1;AAK96591.1;NP_201058.1;AED97618.1	mitochondrion;response to salt stress;reactive oxygen species metabolic process	SRO5	2.77669	41	41	2.77669	contig_2383	0	1392	3.97898	48	48	3.97898	contig_2383	0	1392	5.15072	73	73	5.15072	contig_2383	0	1392	3.9688	19.5897	240	240	19.5897	contig_2383	0	1392	27.135	296	296	27.135
contig_2412	92.5651	77.5338	84.868	39.8466	84.868	39.8466	41.0758	3.31511e-05	0.000279556	hypothetical protein AT2G44010	751	gi|330255267|gb|AEC10361.1|hypothetical protein AT2G44010 [Arabidopsis thaliana]/gi|1032295366|gb|OAP09692.1|hypothetical protein AXX17_AT2G41550 [Arabidopsis thaliana]/gi|15224805|ref|NP_181929.1|hypothetical protein AT2G44010 [Arabidopsis thaliana]/gi|3212858|gb|AAC23409.1|unknown protein [Arabidopsis thaliana]/gi|44917493|gb|AAS49071.1|At2g44010 [Arabidopsis thaliana]	43.33%	AAS49071.1;OAP09692.1;AAC23409.1;NP_181929.1;AEC10361.1		AT2G44010	2.13398	17	17	2.13398	contig_2412	0	751	2.45839	16	16	2.45839	contig_2412	0	751	1.96171	15	15	1.96171	contig_2412	0	751	2.18469	7.8672	52	52	7.8672	contig_2412	0	751	8.49586	50	50	8.49586
contig_13535	117.213	54.9906	79.1202	4.16907	79.1202	4.16907	10.3214	0.00399714	0.011615	UDP-glucosyl transferase 71B6	491	gi|119935878|gb|ABM06021.1|At3g21780 [Arabidopsis thaliana]	54.00%	ABM06021.1	metabolic process;response to salt stress;response to abscisic acid;abscisic acid glucosyltransferase activity;membrane		114.048	594	594	114.048	contig_13535	0	491	80.6089	343	343	80.6089	contig_13535	0	491	105.018	525	525	105.018	contig_13535	0	491	99.8914	31.4713	136	136	31.4713	contig_13535	0	491	24.43	94	94	24.43
contig_31436	77.1507	52.1032	71.6676	9.74794	71.6676	9.74794	172.877	1.30249e-07	5.24463e-06	Auxin efflux carrier family	826	gi|62320921|dbj|BAD93921.1|auxin transporter splice variant b [Arabidopsis thaliana]	91.50%	BAD93921.1	lytic vacuole;endoplasmic reticulum;plasmodesma;auxin:proton symporter activity;response to ethylene;auxin-activated signaling pathway;response to glucose;basal plasma membrane;auxin polar transport;longitudinal axis specification;positive gravitropism;auxin homeostasis;auxin efflux;auxin efflux transmembrane transporter activity;integral component of membrane;root development;transmembrane trans…		7.30436	64	64	7.30436	contig_31436	0	826	7.40399	53	53	7.40399	contig_31436	0	826	9.86921	83	83	9.86921	contig_31436	0	826	8.19252	30.8123	224	224	30.8123	contig_31436	0	826	32.1337	208	208	32.1337
contig_3159	78.3431	56.7206	65.7389	11.8179	65.7389	11.8179	100.152	1.10188e-06	2.31732e-05	2-oxoglutarate (2OG) and Fe(II)-dependent oxygenase superfamily	1113	gi|15230628|ref|NP_187896.1|2-oxoglutarate (2OG) and Fe(II)-dependent oxygenase superfamily protein [Arabidopsis thaliana]/gi|9279774|dbj|BAB01419.1|unnamed protein product [Arabidopsis thaliana]/gi|332641737|gb|AEE75258.1|2-oxoglutarate (2OG) and Fe(II)-dependent oxygenase superfamily protein [Arabidopsis thaliana]/gi|6997165|gb|AAF34829.1|hypothetical protein [Arabidopsis thaliana]/gi|91806419|…	61.40%	AEE75258.1;NP_187896.1;BAB01419.1;OAP03965.1;AAF34829.1;ABE65937.1	"cytoplasm;coumarin biosynthetic process;hydrogen peroxide-mediated programmed cell death;oxidoreductase activity, acting on paired donors, with incorporation or reduction of molecular oxygen, 2-oxoglutarate as one donor, and incorporation of one atom each of oxygen into both donors;cellular response to iron ion;cellular response to ethylene stimulus;cellular response to nitric oxide"	AT3G12900	6.86075	81	81	6.86075	contig_3159	0	1113	4.87274	47	47	4.87274	contig_3159	0	1113	8.11852	92	92	8.11852	contig_3159	0	1113	6.61734	6.22718	61	61	6.22718	contig_3159	0	1113	5.61796	49	49	5.61796
contig_15080	183.447	69.4949	163.033	103.875	163.033	103.875	48.3577	1.79715e-05	0.000177035	cytokinin oxidase	641	gi|1032278010|gb|OAO92338.1|hypothetical protein AXX17_AT5G56170 [Arabidopsis thaliana]	70.00%	OAO92338.1	extracellular region;vacuole;primary amine oxidase activity;cytokinin catabolic process;cytokinin dehydrogenase activity;oxidation-reduction process		1.17656	8	8	1.17656	contig_15080	0	641	0.360033	2	2	0.360033	contig_15080	0	641	3.2177	21	21	3.2177	contig_15080	0	641	1.58476	128.687	726	726	128.687	contig_15080	0	641	181.358	911	911	181.358
contig_23599	75.4328	61.4056	69.4684	32.1288	69.4684	32.1288	94.3223	1.39077e-06	2.74974e-05	2-oxoglutarate (2OG) and Fe(II)-dependent oxygenase superfamily	469	gi|1039013909|gb|ANM63584.1|2-oxoglutarate (2OG) and Fe(II)-dependent oxygenase superfamily protein [Arabidopsis thaliana]/gi|1063718123|ref|NP_001325662.1|2-oxoglutarate (2OG) and Fe(II)-dependent oxygenase superfamily protein [Arabidopsis thaliana]	70.20%	ANM63584.1;NP_001325662.1	"cytoplasm;oxidoreductase activity, acting on paired donors, with incorporation or reduction of molecular oxygen, 2-oxoglutarate as one donor, and incorporation of one atom each of oxygen into both donors;oxidation-reduction process"	AT3G61400	4.42213	22	22	4.42213	contig_23599	0	469	7.87313	32	32	7.87313	contig_23599	0	469	8.37667	40	40	8.37667	contig_23599	0	469	6.89064	2.42261	10	10	2.42261	contig_23599	0	469	1.9046	7	7	1.9046
contig_20350	916.367	625.243	756.127	173.833	756.127	173.833	76.5731	3.11368e-06	4.91905e-05	pathogenesis-related 1	636	gi|1032293784|gb|OAP08110.1|PR1 [Arabidopsis thaliana]	75.00%	OAP08110.1	cell wall;response to water deprivation;response to wounding;response to bacterium;systemic acquired resistance;response to ethylene;response to salicylic acid;response to jasmonic acid;response to vitamin B1;apoplast;response to herbivore		5.92905	40	40	5.92905	contig_20350	0	636	2.54004	14	14	2.54004	contig_20350	0	636	4.78728	31	31	4.78728	contig_20350	0	636	4.41879	9.82567	55	55	9.82567	contig_20350	0	636	1.20385	6	6	1.20385
contig_5201	65.0482	19.5387	54.2412	4.12447	54.2412	4.12447	37.5064	4.64921e-05	0.000359888	---NA---	288						14.0753	43	43	14.0753	contig_5201	0	288	21.6357	54	54	21.6357	contig_5201	0	288	16.3694	48	48	16.3694	contig_5201	0	288	17.3601	41.4241	105	105	41.4241	contig_5201	0	288	54.9423	124	124	54.9423
contig_12450	75.5671	36.5614	62.3886	7.84931	62.3886	7.84931	51.7625	1.38983e-05	0.000146315	multidrug resistance-associated 3	301	gi|7529757|emb|CAB86942.1|ABC transporter-like protein [Arabidopsis thaliana]	86.80%	CAB86942.1	plant-type vacuole;ATP binding;vacuolar membrane;plasma membrane;sulfonylurea receptor activity;xenobiotic-transporting ATPase activity;plasmodesma;response to salt stress;chlorophyll catabolite transmembrane transporter activity;glutathione S-conjugate-exporting ATPase activity;integral component of membrane;cellular potassium ion homeostasis;apoplast;transmembrane transport;abscisic acid-activa…		10.3355	33	33	10.3355	contig_12450	0	301	11.1174	29	29	11.1174	contig_12450	0	301	5.87341	18	18	5.87341	contig_12450	0	301	9.10874	35.1053	93	93	35.1053	contig_12450	0	301	30.9481	73	73	30.9481
contig_12989	76.8494	33.5243	59.2208	5.83669	59.2208	5.83669	20.7033	0.000397677	0.00184701	nodulin 21 -like transporter family	968	gi|18405635|ref|NP_566831.1|nodulin MtN21 /EamA-like transporter family protein [Arabidopsis thaliana]/gi|1032292197|gb|OAP06524.1|UMAMIT41 [Arabidopsis thaliana]/gi|332643874|gb|AEE77395.1|nodulin MtN21 /EamA-like transporter family protein [Arabidopsis thaliana]/gi|13937165|gb|AAK50076.1|AF372936_1AT3g28050/MMG15_6 [Arabidopsis thaliana]/gi|22137010|gb|AAM91350.1|At3g28050/MMG15_6 [Arabidopsis …	71.30%	NP_566831.1;AEE77395.1;AAK50076.1;AAM91350.1;OAP06524.1;Q94JU2.1	plasma membrane;transport;transmembrane transporter activity	UMAMIT41	13.3422	134	137	13.3422	contig_12989	0	968	12.6357	104	106	12.6357	contig_12989	0	968	13.4946	129	133	13.4946	contig_12989	0	968	13.1575	16.3153	121	139	16.3153	contig_12989	0	968	11.4689	80	87	11.4689
contig_8533	71.8931	49.1771	54.9643	4.39707	54.9643	4.39707	44.4345	2.47046e-05	0.000224736	---NA---	310						18.2462	57	60	18.2462	contig_8533	0	310	18.2392	47	49	18.2392	contig_8533	0	310	13.6236	42	43	13.6236	contig_8533	0	310	16.703	17.9594	49	49	17.9594	contig_8533	0	310	14.819	36	36	14.819
contig_6302	94.3466	55.0153	74.9626	17.5125	74.9626	17.5125	11.8837	0.0025644	0.00813795	---NA---	378						4.23974	17	17	4.23974	contig_6302	0	378	3.66319	12	12	3.66319	contig_6302	0	378	5.7163	22	22	5.7163	contig_6302	0	378	4.53974	19.2373	64	64	19.2373	contig_6302	0	378	33.0835	98	98	33.0835
contig_20613	351.982	229.26	307.502	8.78235	307.502	8.78235	81.0808	2.49738e-06	4.18766e-05	expansin A1	380	gi|332196825|gb|AEE34946.1|expansin A1 [Arabidopsis thaliana]/gi|334183768|ref|NP_001185357.1|expansin A1 [Arabidopsis thaliana]	87.50%	NP_001185357.1;AEE34946.1	structural constituent of cell wall;extracellular region;syncytium formation;plant-type cell wall;response to gibberellin;unidimensional cell growth;plant-type cell wall loosening;plant-type cell wall modification involved in multidimensional cell growth;response to red light;regulation of stomatal movement;integral component of membrane	EXPA1	50.1129	200	202	50.1129	contig_20613	0	380	27.3293	87	90	27.3293	contig_20613	0	380	41.0958	151	159	41.0958	contig_20613	0	380	39.5127	287.639	939	962	287.639	contig_20613	0	380	374.093	1086	1114	374.093
contig_13886	294.881	176.326	262.844	43.4587	262.844	43.4587	53.1752	1.25509e-05	0.000135588	CTP synthase family	594	gi|1063720580|ref|NP_001329019.1|CTP synthase family protein [Arabidopsis thaliana]/gi|1039017840|gb|ANM67175.1|CTP synthase family protein [Arabidopsis thaliana]	98.00%	NP_001329019.1;ANM67175.1	CTP synthase activity;ATP binding;cytoplasm;'de novo' CTP biosynthetic process	AT4G02120	5.23732	33	33	5.23732	contig_13886	0	594	7.38189	37	38	7.38189	contig_13886	0	594	5.95251	35	36	5.95251	contig_13886	0	594	6.19057	300.119	1568	1569	300.119	contig_13886	0	594	221.703	1026	1032	221.703
contig_18075	71.228	14.7852	55.7482	4.8849	55.7482	4.8849	42.0543	3.03606e-05	0.00026236	terpene synthase 21	943	"gi|332005856|gb|AED93239.1|terpene synthase 21 [Arabidopsis thaliana]/gi|28396620|emb|CAD66638.1|putative delta-cadinene synthase, PUP8 [Arabidopsis thaliana]/gi|334187885|ref|NP_001190374.1|terpene synthase 21 [Arabidopsis thaliana]"	57.10%	NP_001190374.1;CAD66638.1;AED93239.1	sesquiterpenoid biosynthetic process;sesquiterpene biosynthetic process;(-)-E-beta-caryophyllene synthase activity;alpha-humulene synthase activity;response to herbivore	TPS21	15.9952	160	160	15.9952	contig_18075	0	943	13.8273	112	113	13.8273	contig_18075	0	943	13.2275	126	127	13.2275	contig_18075	0	943	14.35	52.8944	434	439	52.8944	contig_18075	0	943	50.8808	373	376	50.8808
contig_4741	169.714	93.0807	-146.975	-5.58929	-146.975	-5.58929	46.6048	2.06528e-05	0.000196569	---NA---	321						146.547	392	499	146.547	contig_4741	0	321	195.553	413	544	195.553	contig_4741	0	321	194.903	499	637	194.903	contig_4741	0	321	179.001	25.8389	63	73	25.8389	contig_4741	0	321	29.4174	61	74	29.4174
contig_14390	128.423	90.1007	108.526	24.762	108.526	24.762	90.4876	1.63355e-06	3.08531e-05	Haloacid dehalogenase-like hydrolase (HAD) superfamily	1629	gi|28973301|gb|AAO63975.1|unknown protein [Arabidopsis thaliana]/gi|26452744|dbj|BAC43453.1|putative protein [Arabidopsis thaliana]/gi|30692524|ref|NP_195687.2|Haloacid dehalogenase-like hydrolase (HAD) superfamily protein [Arabidopsis thaliana]/gi|75150965|sp|Q8GWG2.1|TPPH_ARATHRecName: Full=Probable trehalose-phosphate phosphatase H Short=AtTPPH AltName: Full=Trehalose 6-phosphate phosphatase/g…	76.30%	AAO63975.1;Q8GWG2.1;AEE87117.1;BAC43453.1;NP_195687.2	trehalose-phosphatase activity;nucleus;cytosol;trehalose biosynthetic process;response to oxidative stress;chloroplast;response to salt stress;trehalase activity;trehalose metabolism in response to stress	TPPH	4.91903	85	85	4.91903	contig_14390	0	1629	4.32095	61	61	4.32095	contig_14390	0	1629	4.46164	74	74	4.46164	contig_14390	0	1629	4.56721	7.81185	112	112	7.81185	contig_14390	0	1629	5.24845	67	67	5.24845
contig_5554	108.385	69.8673	91.0816	34.1151	91.0816	34.1151	26.5666	0.000164058	0.00093512	aspartate aminotransferase	1067	gi|1032293853|gb|OAP08179.1|ASP1 [Arabidopsis thaliana]	66.00%	OAP08179.1	DNA binding;L-aspartate:2-oxoglutarate aminotransferase activity;GTPase activator activity;copper ion binding;cell wall;nucleus;mitochondrial matrix;vacuolar membrane;peroxisome;Golgi apparatus;cytosol;plasma membrane;nitrogen compound metabolic process;biosynthetic process;response to cold;plasmodesma;chloroplast stroma;chloroplast envelope;leaf senescence;stromule;vesicle-mediated transport;pyr…		3.97585	45	45	3.97585	contig_5554	0	1067	1.51403	14	14	1.51403	contig_5554	0	1067	2.76147	30	30	2.76147	contig_5554	0	1067	2.75045	21.5102	202	202	21.5102	contig_5554	0	1067	28.1048	235	235	28.1048
contig_1110	61.1795	19.4236	54.8602	4.76098	54.8602	4.76098	101.732	1.03683e-06	2.21385e-05	UDP-Glycosyltransferase superfamily	1387	gi|1032286204|gb|OAP00532.1|UGT72B1 [Arabidopsis thaliana]	63.20%	OAP00532.1	endoplasmic reticulum;response to toxic substance;response to salt stress;lignin biosynthetic process;flavonoid metabolic process;xenobiotic catabolic process;quercetin 3-O-glucosyltransferase activity		58.7925	865	865	58.7925	contig_1110	0	1387	64.4756	775	775	64.4756	contig_1110	0	1387	66.2094	935	935	66.2094	contig_1110	0	1387	63.1591	17.1209	209	209	17.1209	contig_1110	0	1387	12.7884	139	139	12.7884
contig_21341	190.737	67.8813	144.728	23.1601	144.728	23.1601	24.4673	0.000220356	0.00117231	1-aminocyclopropane-1-carboxylate synthase	876	gi|1032284471|gb|OAO98798.1|ACS8 [Arabidopsis thaliana]	81.30%	OAO98798.1	vasculature development;cytoplasm;regulation of translation;ethylene biosynthetic process;response to auxin;response to cytokinin;fruit ripening;1-aminocyclopropane-1-carboxylate synthase activity;pyridoxal phosphate binding;1-aminocyclopropane-1-carboxylate biosynthetic process;identical protein binding;cell division;cellular response to iron ion		4.73512	44	44	4.73512	contig_21341	0	876	5.66415	43	43	5.66415	contig_21341	0	876	9.19378	82	82	9.19378	contig_21341	0	876	6.53101	122.829	947	947	122.829	contig_21341	0	876	135.474	930	930	135.474
contig_2551	81.9072	43.7867	66.191	22.297	66.191	22.297	54.6495	1.13143e-05	0.00012617	sigma factor binding 1	830	"gi|27312003|gb|AAO00967.1|SigA binding protein [Arabidopsis thaliana]/gi|14596087|gb|AAK68771.1|SigA binding protein [Arabidopsis thaliana]/gi|15228994|ref|NP_191230.1|sigma factor binding protein 1 [Arabidopsis thaliana]/gi|6980074|gb|AAF34713.1|AF224762_1SigA binding protein [Arabidopsis thaliana]/gi|9662990|emb|CAC00734.1|SigA binding protein [Arabidopsis thaliana]/gi|1032292136|gb|OAP06463.1…	80.50%	AEE79554.1;AAF34713.1;ANM63329.1;AAK68771.1;NP_001325423.1;CAC00734.1;AAO00967.1;Q9LDH1.1;NP_191230.1;OAP06463.1	"protein binding;nucleus;chloroplast;defense response to bacterium, incompatible interaction;positive regulation of sequence-specific DNA binding transcription factor activity;cellular response to light stimulus"	SIB1	27.0322	238	238	27.0322	contig_2551	0	830	18.4903	133	133	18.4903	contig_2551	0	830	24.3766	206	206	24.3766	contig_2551	0	830	23.2997	3.5592	26	26	3.5592	contig_2551	0	830	2.15242	14	14	2.15242
contig_30821	125.477	72.1418	101.606	5.7434	101.606	5.7434	18.7839	0.000557761	0.00241712	---NA---	455						21.3407	103	103	21.3407	contig_30821	0	455	25.8678	102	102	25.8678	contig_30821	0	455	17.053	79	79	17.053	contig_30821	0	455	21.4205	112.122	449	449	112.122	contig_30821	0	455	114.426	408	408	114.426
contig_12249	74.191	17.2958	54.227	4.70707	54.227	4.70707	19.9957	0.000449015	0.00203269	alpha beta-Hydrolases superfamily	344	gi|7268782|emb|CAB78988.1|putative protein [Arabidopsis thaliana]/gi|3250695|emb|CAA19703.1|putative protein [Arabidopsis thaliana]	77.00%	CAB78988.1;CAA19703.1	phosphatidylcholine-sterol O-acyltransferase activity;phospholipase activity;cytosol;phospholipid catabolic process		57.8237	211	211	57.8237	contig_12249	0	344	46.2904	137	138	46.2904	contig_12249	0	344	46.2531	162	162	46.2531	contig_12249	0	344	50.1224	15.1934	46	46	15.1934	contig_12249	0	344	9.64478	26	26	9.64478
contig_1692	248.547	159.962	-215.956	-7.30178	-215.956	-7.30178	68.4758	4.7846e-06	6.68372e-05	zinc finger transcription factor	370	gi|1032293833|gb|OAP08159.1|ZFAR1 [Arabidopsis thaliana]	77.30%	OAP08159.1	"DNA binding;transcription factor activity, sequence-specific DNA binding;nucleus;cytoplasm;regulation of transcription, DNA-templated;response to cold;response to chitin;metal ion binding;defense response to fungus"		277.72	954	1090	277.72	contig_1692	0	370	204.584	580	656	204.584	contig_1692	0	370	268.37	883	1011	268.37	contig_1692	0	370	250.225	29.1728	80	95	29.1728	contig_1692	0	370	42.421	107	123	42.421
contig_5750	75.7114	53.2663	63.3613	13.6224	63.3613	13.6224	104.284	9.41603e-07	2.06391e-05	---NA---	317						6.24514	21	21	6.24514	contig_5750	0	317	5.09611	14	14	5.09611	contig_5750	0	317	3.71797	12	12	3.71797	contig_5750	0	317	5.01974	15.4122	43	43	15.4122	contig_5750	0	317	12.0765	30	30	12.0765
contig_6110	68.5589	34.5317	51.5607	4.09553	51.5607	4.09553	21.761	0.000333876	0.00161084	NAM (no apical meristem)	626	gi|332010085|gb|AED97468.1|NAC domain containing protein 100 [Arabidopsis thaliana]/gi|15451128|gb|AAK96835.1|NAM (no apical meristem)-like protein [Arabidopsis thaliana]/gi|1032281263|gb|OAO95591.1|NAC100 [Arabidopsis thaliana]/gi|75171471|sp|Q9FLJ2.1|NC100_ARATHRecName: Full=NAC domain-containing protein 100 Short=ANAC100 Short=AtNAC5/gi|9757865|dbj|BAB08499.1|NAM (no apical meristem)-like prot…	91.50%	AED97468.1;AAK96835.1;NP_200951.1;BAB08499.1;OAO95591.1;AAM10058.1;Q9FLJ2.1	"transcription factor activity, sequence-specific DNA binding;nucleus;cytoplasm;transcription, DNA-templated;response to water deprivation;response to salt stress;response to ethylene;response to auxin;response to abscisic acid;jasmonic acid mediated signaling pathway;regulation of seed germination;leaf senescence;response to hydrogen peroxide;protein homodimerization activity;positive regulation…	NAC100	16.1136	107	107	16.1136	contig_6110	0	626	17.6957	96	96	17.6957	contig_6110	0	626	16.1602	103	103	16.1602	contig_6110	0	626	16.6565	19.0578	105	105	19.0578	contig_6110	0	626	20.5885	99	101	20.5885
contig_7415	67.6922	51.2326	60.918	6.40331	60.918	6.40331	248.68	3.10478e-08	2.07952e-06	cyclin D3	1619	gi|15235254|ref|NP_195142.1|CYCLIN D31 [Arabidopsis thaliana]/gi|7270365|emb|CAB80133.1|cyclin delta-3 [Arabidopsis thaliana]/gi|332660935|gb|AEE86335.1|CYCLIN D31 [Arabidopsis thaliana]/gi|59802919|sp|P42753.3|CCD31_ARATHRecName: Full=Cyclin-D3-1 AltName: Full=Cyclin-delta-3 Short=Cyclin-d3 AltName: Full=G1/S-specific cyclin-D3-1 Short=CycD31/gi|2911046|emb|CAA17556.1|cyclin delta-3 [Arabidopsis…	61.90%	P42753.3;BAD95437.1;AEE86335.1;CAA17556.1;NP_195142.1;CAB80133.1	G1/S transition of mitotic cell cycle;protein binding;nucleus;response to cytokinin;response to brassinosteroid;response to sucrose;guard mother cell differentiation;regulation of cell proliferation;seed development	CYCD3	12.752	219	219	12.752	contig_7415	0	1619	11.5462	162	162	11.5462	contig_7415	0	1619	9.52439	157	157	9.52439	contig_7415	0	1619	11.2742	24.2119	345	345	24.2119	contig_7415	0	1619	24.9856	317	317	24.9856
contig_7953	69.9173	54.1388	56.8997	6.08072	56.8997	6.08072	9.63381	0.00494116	0.0138065	---NA---	313						14.1558	47	47	14.1558	contig_7953	0	313	12.5344	34	34	12.5344	contig_7953	0	313	13.493	43	43	13.493	contig_7953	0	313	13.3944	10.5271	29	29	10.5271	contig_7953	0	313	11.0077	27	27	11.0077
contig_3162	71.9955	63.1082	68.0096	#DIV/0!	68.0096	#DIV/0!	117.592	5.89686e-07	1.50298e-05	---NA---	322						0	0	0	0	contig_3162	0	322	0	0	0	0	contig_3162	0	322	0	0	0	0	contig_3162	0	322	0	2.82287	8	8	2.82287	contig_3162	0	322	8.32225	21	21	8.32225
contig_11754	999.561	852.177	-927.424	-14.7147	-927.424	-14.7147	449.727	2.96403e-09	4.8712e-07	Peroxidase superfamily	517	"gi|24417430|gb|AAN60325.1|unknown, partial [Arabidopsis thaliana]"	85.70%	AAN60325.1	peroxidase activity;extracellular region;vacuole;cytosol;response to oxidative stress;plant-type cell wall;plasmodesma;plant-type cell wall organization;membrane;heme binding;hydrogen peroxide catabolic process;metal ion binding;rhythmic process;defense response to fungus;oxidation-reduction process		1044.83	5719	5730	1044.83	contig_11754	0	517	932.498	4173	4178	932.498	contig_11754	0	517	1007.81	5299	5305	1007.81	contig_11754	0	517	995.047	185.705	845	845	185.705	contig_11754	0	517	130.076	527	527	130.076
contig_34011	524.54	264.287	382.22	11.8516	382.22	11.8516	24.3745	0.000223363	0.00118397	expansin A1	400	gi|3461833|gb|AAC32927.1|putative expansin [Arabidopsis thaliana]	90.20%	AAC32927.1	structural constituent of cell wall;extracellular region;syncytium formation;plant-type cell wall;response to gibberellin;unidimensional cell growth;plant-type cell wall loosening;plant-type cell wall modification involved in multidimensional cell growth;response to red light;regulation of stomatal movement;integral component of membrane;primary root development		37.4731	148	159	37.4731	contig_34011	0	400	37.5019	121	130	37.5019	contig_34011	0	400	30.6926	116	125	30.6926	contig_34011	0	400	35.2225	315.865	1020	1112	315.865	contig_34011	0	400	381.229	1075	1195	381.229
contig_292	87.0759	24.5508	78.4556	5.45631	78.4556	5.45631	151.085	2.2114e-07	7.60519e-06	Calcium-binding EF-hand family	1077	gi|75331780|sp|Q93Z27.1|CML45_ARATHRecName: Full=Probable calcium-binding protein CML45 AltName: Full=Calmodulin-like protein 45/gi|1032281009|gb|OAO95337.1|hypothetical protein AXX17_AT5G37100 [Arabidopsis thaliana]/gi|332007079|gb|AED94462.1|Calcium-binding EF-hand family protein [Arabidopsis thaliana]/gi|18421893|ref|NP_568568.1|Calcium-binding EF-hand family protein [Arabidopsis thaliana]/gi|…	59.90%	AAL25605.1;OAO95337.1;NP_568568.1;Q93Z27.1;AED94462.1;AAM19987.1	calcium ion binding;plasma membrane;endomembrane system;membrane-bounded organelle;intracellular organelle;cytoplasmic part	AT5G39670	65.9115	753	753	65.9115	contig_292	0	1077	67.0701	626	626	67.0701	contig_292	0	1077	71.4965	784	784	71.4965	contig_292	0	1077	68.1594	22.9984	218	218	22.9984	contig_292	0	1077	14.4551	122	122	14.4551
contig_3154	348.076	274.077	-311.186	-5.64561	-311.186	-5.64561	130.56	3.91832e-07	1.1562e-05	senescence associated gene 20	1022	gi|6016696|gb|AAF01523.1|AC009991_19unknown protein [Arabidopsis thaliana]	58.25%	AAF01523.1	aging;response to fungus		389.171	4219	4219	389.171	contig_3154	0	1022	338.155	2995	2995	338.155	contig_3154	0	1022	407.185	4237	4237	407.185	contig_3154	0	1022	378.17	110.619	995	995	110.619	contig_3154	0	1022	61.3067	491	491	61.3067
contig_7017	85.8775	23.3587	74.2487	6.14338	74.2487	6.14338	54.5786	1.13702e-05	0.00012656	WRKY-type DNA binding	1731	gi|330255727|gb|AEC10821.1|WRKY DNA-binding protein 23 [Arabidopsis thaliana]/gi|30017307|gb|AAP12887.1|At2g47260 [Arabidopsis thaliana]/gi|2275204|gb|AAB63826.1|putative WRKY-type DNA binding protein [Arabidopsis thaliana]/gi|15226550|ref|NP_182248.1|WRKY DNA-binding protein 23 [Arabidopsis thaliana]/gi|26450898|dbj|BAC42556.1|putative WRKY-type DNA binding protein [Arabidopsis thaliana]/gi|1599…	80.80%	AEC10821.1;NP_182248.1;AAL11008.1;AAB63826.1;O22900.1;AAP12887.1;BAC42556.1	"transcription factor activity, sequence-specific DNA binding;protein binding;nucleus;transcription, DNA-templated;response to nematode;response to auxin;response to abscisic acid;vegetative to reproductive phase transition of meristem;defense response to bacterium;positive regulation of transcription, DNA-templated;defense response to fungus;defense response to virus;cellular response to hydroge…	WRKY23	12.5805	226	231	12.5805	contig_7017	0	1731	16.5986	241	249	16.5986	contig_7017	0	1731	14.1282	238	249	14.1282	contig_7017	0	1731	14.4358	98.458	1488	1500	98.458	contig_7017	0	1731	91.1906	1229	1237	91.1906
contig_3372	90.6407	70.3694	80.1784	5.93377	80.1784	5.93377	169.99	1.39167e-07	5.48217e-06	nudix family	302	gi|334186460|ref|NP_001190707.1|MutT/nudix family protein [Arabidopsis thaliana]/gi|332657770|gb|AEE83170.1|MutT/nudix family protein [Arabidopsis thaliana]	60.00%	AEE83170.1;NP_001190707.1		NUDT7	11.5499	37	37	11.5499	contig_3372	0	302	18.3402	48	48	18.3402	contig_3372	0	302	18.8628	58	58	18.8628	contig_3372	0	302	16.2509	18.0589	48	48	18.0589	contig_3372	0	302	18.5919	44	44	18.5919
contig_7203	106	37.6037	73.4837	24.4532	73.4837	24.4532	7.73231	0.0094844	0.0235586	---NA---	300						4.39935	14	14	4.39935	contig_7203	0	300	5.00026	13	13	5.00026	contig_7203	0	300	0	0	0	0	contig_7203	0	300	3.1332	26.1327	69	69	26.1327	contig_7203	0	300	35.7302	84	84	35.7302
contig_11876	69.8186	37.184	62.8257	17.2868	62.8257	17.2868	105.229	9.09137e-07	2.01762e-05	seed imbibition 2	388	"gi|110740842|dbj|BAE98518.1|imbibition protein homolog, partial [Arabidopsis thaliana]"	80.50%	BAE98518.1	cytoplasm;response to oxidative stress;plasmodesma;raffinose catabolic process;galactinol-sucrose galactosyltransferase activity;raffinose alpha-galactosidase activity;response to karrikin		4.13047	14	17	4.13047	contig_11876	0	388	2.37919	7	8	2.37919	contig_11876	0	388	5.0627	13	20	5.0627	contig_11876	0	388	3.85745	41.2899	103	141	41.2899	contig_11876	0	388	27.6265	63	84	27.6265
contig_14598	101.463	42.7881	85.3297	6.3304	85.3297	6.3304	19.9069	0.000456027	0.00205725	cytochrome p450 like	344	"gi|332189144|gb|AEE27265.1|cytochrome P450, family 703, subfamily A, polypeptide 2 [Arabidopsis thaliana]/gi|63003812|gb|AAY25435.1|At1g01280 [Arabidopsis thaliana]/gi|1032305231|gb|OAP19556.1|CYP703A2 [Arabidopsis thaliana]/gi|15223365|ref|NP_171635.1|cytochrome P450, family 703, subfamily A, polypeptide 2 [Arabidopsis thaliana]/gi|75311401|sp|Q9LNJ4.1|C70A2_ARATHRecName: Full=Cytochrome P450 7…	59.20%	NP_171635.1;AEE27265.1;OAP19556.1;AAY25435.1;Q9LNJ4.1;AAF97323.1	protein binding;response to UV;plasmodesma;response to auxin;flavonoid biosynthetic process;membrane;flavonoid 3'-monooxygenase activity;medium-chain fatty acid biosynthetic process;sporopollenin biosynthetic process	CYP703A2	97.5604	330	356	97.5604	contig_14598	0	344	68.4293	179	204	68.4293	contig_14598	0	344	81.0857	251	284	81.0857	contig_14598	0	344	82.3585	17.8358	48	54	17.8358	contig_14598	0	344	13.7253	28	37	13.7253
contig_5474	121.486	32.5573	90.7798	8.97066	90.7798	8.97066	23.6821	0.000247506	0.00128109	hypothetical protein AT1G54120	699	gi|4587555|gb|AAD25786.1|AC006577_22F15I1.22 [Arabidopsis thaliana]/gi|18404798|ref|NP_564651.1|hypothetical protein AT1G54120 [Arabidopsis thaliana]/gi|17104739|gb|AAL34258.1|unknown protein [Arabidopsis thaliana]/gi|332194931|gb|AEE33052.1|hypothetical protein AT1G54120 [Arabidopsis thaliana]/gi|1032305373|gb|OAP19698.1|hypothetical protein AXX17_AT1G48560 [Arabidopsis thaliana]/gi|21618035|gb|…	63.50%	OAP19698.1;AEE33052.1;AAK59410.1;AAM67085.1;AAL34258.1;NP_564651.1;AAD25786.1	cell wall;cytoplasm	AT1G54120	13.0821	97	97	13.0821	contig_5474	0	699	11.3905	69	69	11.3905	contig_5474	0	699	9.69519	69	69	9.69519	contig_5474	0	699	11.3892	56.4039	347	347	56.4039	contig_5474	0	699	54.7673	300	300	54.7673
contig_4107	69.3726	64.8555	65.3136	26.1708	65.3136	26.1708	481.736	2.25524e-09	4.11609e-07	Glycosyl hydrolases family 32	1989	"gi|15027839|gb|AAK76450.1|putative beta-fructofuranosidase 1 [Arabidopsis thaliana]/gi|757536|emb|CAA52620.1|beta-fructofuranosidase [Arabidopsis thaliana]/gi|332641893|gb|AEE75414.1|Glycosyl hydrolases family 32 protein [Arabidopsis thaliana]/gi|18400170|ref|NP_566464.1|Glycosyl hydrolases family 32 protein [Arabidopsis thaliana]/gi|75102977|sp|Q43866.1|INV1_ARATHRecName: Full=Beta-fructofurano…	69.50%	CAA52619.1;AAL85153.1;Q43866.1;CAA52620.1;AAK76450.1;NP_566464.1;AEE75414.1	beta-fructofuranosidase activity;extracellular region;cell wall;vacuole;plasma membrane;response to wounding;levanase activity;response to karrikin	ATBFRUCT1	2.18024	46	46	2.18024	contig_4107	0	1989	3.48086	60	60	3.48086	contig_4107	0	1989	2.12333	43	43	2.12333	contig_4107	0	1989	2.59481	4.96983	87	87	4.96983	contig_4107	0	1989	2.95121	46	46	2.95121
contig_5745	77.8558	55.9205	57.7686	7.85431	57.7686	7.85431	39.4435	3.85595e-05	0.000313517	cytochrome family subfamily polypeptide 2	1838	"gi|15239304|ref|NP_198460.1|cytochrome P450, family 716, subfamily A, polypeptide 1 [Arabidopsis thaliana]/gi|332006662|gb|AED94045.1|cytochrome P450, family 716, subfamily A, polypeptide 1 [Arabidopsis thaliana]/gi|8777295|dbj|BAA96885.1|cytochrome P450-like [Arabidopsis thaliana]"	61.30%	BAA96885.1;AED94045.1;NP_198460.1	"monooxygenase activity;extracellular region;multicellular organism development;response to red or far red light;abscisic acid metabolic process;brassinosteroid homeostasis;sterol metabolic process;brassinosteroid biosynthetic process;oxidoreductase activity, acting on paired donors, with incorporation or reduction of molecular oxygen;oxygen binding"	CYP716A1	10.4633	204	204	10.4633	contig_5745	0	1838	15.6323	249	249	15.6323	contig_5745	0	1838	5.82459	109	109	5.82459	contig_5745	0	1838	10.6401	3.95632	64	64	3.95632	contig_5745	0	1838	11.1778	161	161	11.1778
contig_13103	85.5334	73.8821	79.6117	36.5704	79.6117	36.5704	172.999	1.29888e-07	5.24301e-06	---NA---	659						1.85969	13	13	1.85969	contig_13103	0	659	1.5759	9	9	1.5759	contig_13103	0	659	3.27885	22	22	3.27885	contig_13103	0	659	2.23814	9.82757	57	57	9.82757	contig_13103	0	659	4.26005	22	22	4.26005
contig_4234	61.1547	46.6485	53.6727	5.38371	53.6727	5.38371	88.4773	1.78205e-06	3.30731e-05	bZIP transcription factor family	671	gi|44888356|sp|Q39162.2|TGA4_ARATHRecName: Full=Transcription factor TGA4 AltName: Full=Ocs element-binding factor 4 Short=OBF4 AltName: Full=bZIP transcription factor 57 Short=AtbZIP57/gi|332004102|gb|AED91485.1|TGACG motif-binding factor 4 [Arabidopsis thaliana]/gi|1039019776|gb|ANM68901.1|TGACG motif-binding factor 4 [Arabidopsis thaliana]/gi|7960722|emb|CAB92044.1|transcription factor OBF4 [A…	87.20%	NP_001330618.1;AED91485.1;AED91484.1;NP_001330616.1;ABD85167.1;NP_001330617.1;ANM68901.1;ANM68900.1;NP_196565.1;NP_001190270.1;CAB92044.1;ANM68902.1;BAF01214.1;Q39162.2	"transcription factor activity, sequence-specific DNA binding;calmodulin binding;nucleus;transcription, DNA-templated;regulation of transcription, DNA-templated;response to cold;defense response to bacterium;sequence-specific DNA binding;transcription regulatory region DNA binding"	TGA4	13.628	97	97	13.628	contig_4234	0	671	15.3052	89	89	15.3052	contig_4234	0	671	12.5881	86	86	12.5881	contig_4234	0	671	13.8404	17.1023	101	101	17.1023	contig_4234	0	671	9.69896	51	51	9.69896
contig_12200	67.0306	42.6232	60.5516	13.118	60.5516	13.118	69.7512	4.45757e-06	6.36396e-05	pseudo-response regulator 9	646	gi|1032276914|gb|OAO91242.1|PRR5 [Arabidopsis thaliana]	93.10%	OAO91242.1	"phosphorelay response regulator activity;phosphorelay signal transduction system;DNA binding;protein binding;nucleus;transcription, DNA-templated;circadian rhythm;response to temperature stimulus;photomorphogenesis;red or far-red light signaling pathway;response to red light;response to far red light;negative regulation of transcription, DNA-templated;nuclear import"		40.1312	267	275	40.1312	contig_12200	0	646	53.4083	294	299	53.4083	contig_12200	0	646	42.7226	279	281	42.7226	contig_12200	0	646	45.4207	4.74884	27	27	4.74884	contig_12200	0	646	4.74085	24	24	4.74085
contig_3608	55.4735	39.1689	50.5488	4.40292	50.5488	4.40292	98.5031	1.17528e-06	2.41389e-05	ketose-bisphosphate aldolase class-II family	2597	gi|332191575|gb|AEE29696.1|ketose-bisphosphate aldolase class-II family protein [Arabidopsis thaliana]/gi|334182667|ref|NP_001185028.1|ketose-bisphosphate aldolase class-II family protein [Arabidopsis thaliana]	70.30%	NP_001185028.1;AEE29696.1	fructose-bisphosphate aldolase activity;phosphogluconate dehydrogenase (decarboxylating) activity;nucleus;mitochondrion;glycolytic process;zinc ion binding;NAD binding;oxidation-reduction process	AT1G18270	15.355	423	423	15.355	contig_3608	0	2597	17.1064	385	385	17.1064	contig_3608	0	2597	12.1021	320	320	12.1021	contig_3608	0	2597	14.8545	35.438	810	810	35.438	contig_3608	0	2597	25.7967	525	525	25.7967
contig_1045	165.036	102.309	146.96	6.71254	146.96	6.71254	135.872	3.35216e-07	1.03353e-05	ethylene response sensor (ERS)	2412	gi|75101868|sp|Q38846.1|ERS1_ARATHRecName: Full=Ethylene response sensor 1 Short=AtERS1 AltName: Full=Protein ERS1/gi|1046225|gb|AAC49090.1|ethylene response sensor [Arabidopsis thaliana]/gi|2623308|gb|AAB86454.1|ethylene response sensor (ERS) [Arabidopsis thaliana]/gi|1584365|prf||2122405AERS gene/gi|15226788|ref|NP_181626.1|ethylene response sensor 1 [Arabidopsis thaliana]/gi|15450904|gb|AAK967…	79.60%	2122405A;OAP07328.1;AAK96723.1;AEC09904.1;AAC49090.1;NP_181626.1;AAN15478.1;AAB86454.1;Q38846.1	"phosphorelay sensor kinase activity;phosphorelay response regulator activity;vasculature development;response to molecule of bacterial origin;protein serine/threonine kinase activity;ATP binding;endoplasmic reticulum membrane;response to heat;response to insect;response to salt stress;cytokinin metabolic process;detection of ethylene stimulus;response to auxin;response to abscisic acid;response …	ERS1	25.0532	641	641	25.0532	contig_1045	0	2412	25.738	538	538	25.738	contig_1045	0	2412	26.3865	648	648	26.3865	contig_1045	0	2412	25.7259	168.075	3568	3568	168.075	contig_1045	0	2412	190.089	3593	3593	190.089
contig_9693	111.298	86.9962	-103.69	-4.3916	-103.69	-4.3916	202.767	6.95057e-08	3.53564e-06	AF412087_1AT3g45210 T14D3_150	678	"gi|20259627|gb|AAM14170.1|unknown protein [Arabidopsis thaliana]/gi|1032281957|gb|OAO96285.1|hypothetical protein AXX17_AT5G60140 [Arabidopsis thaliana]/gi|9759332|dbj|BAB09841.1|unnamed protein product [Arabidopsis thaliana]/gi|17380830|gb|AAL36227.1|unknown protein [Arabidopsis thaliana]/gi|332009983|gb|AED97366.1|transcription initiation factor TFIID subunit (Protein of unknown function, DUF5…	61.80%	NP_200876.1;AAL36227.1;OAO96285.1;AAM14170.1;BAB09841.1;AED97366.1	nucleus	AT5G60680	131.953	949	949	131.953	contig_9693	0	678	133.942	787	787	133.942	contig_9693	0	678	136.895	945	945	136.895	contig_9693	0	678	134.263	34.0191	203	203	34.0191	contig_9693	0	678	25.5969	136	136	25.5969
contig_1594	154.87	83.3168	110.286	196.124	110.286	196.124	22.838	0.000281519	0.00141343	#NAME?	597	gi|1032277655|gb|OAO91983.1|hypothetical protein AXX17_AT5G36570 [Arabidopsis thaliana]	79.10%	OAO91983.1	cell wall;manganese ion binding;oxalate metabolic process;nutrient reservoir activity;oxalate decarboxylase activity;apoplast		0.473728	3	3	0.473728	contig_1594	0	597	0.193284	1	1	0.193284	contig_1594	0	597	1.48065	9	9	1.48065	contig_1594	0	597	0.715887	0.951596	5	5	0.951596	contig_1594	0	597	0	0	0	0
contig_6204	272.49	225.535	-252.489	-5.96126	-252.489	-5.96126	318.626	1.16393e-08	1.14875e-06	Remorin family	768	gi|42573455|ref|NP_974824.1|Remorin family protein [Arabidopsis thaliana]/gi|332005825|gb|AED93208.1|Remorin family protein [Arabidopsis thaliana]	79.60%	NP_974824.1;AED93208.1	DNA binding;protein binding;nucleus;vacuole;plasma membrane;plasmodesma	AT5G23750	282.693	2303	2303	282.693	contig_6204	0	768	320.78	2135	2135	320.78	contig_6204	0	768	306.671	2398	2398	306.671	contig_6204	0	768	303.381	73.6758	498	498	73.6758	contig_6204	0	768	57.1577	344	344	57.1577
contig_1492	120.271	64.1211	-93.7934	-5.59516	-93.7934	-5.59516	38.0774	4.39573e-05	0.000345708	OBP3-responsive 1	954	"gi|1032277494|gb|OAO91822.1|ORG1 [Arabidopsis thaliana]/gi|30725494|gb|AAP37769.1|At5g53450 [Arabidopsis thaliana]/gi|75335521|sp|Q9LV04.1|PAP14_ARATHRecName: Full=Probable plastid-lipid-associated protein 14, chloroplastic Short=AtPap14 AltName: Full=Fibrillin-11 AltName: Full=OBP3-responsive protein 1 Flags: Precursor/gi|25082900|gb|AAN72012.1|putative protein [Arabidopsis thaliana]/gi|8843774…	93.00%	AED96355.1;OAO91822.1;AAP37769.1;BAA97322.1;NP_851182.1;Q9LV04.1;AAN72012.1	cyclin-dependent protein serine/threonine kinase activity;nucleus;protein phosphorylation;regulation of mitotic cell cycle;regulation of gene expression	ORG1	103.66	1049	1049	103.66	contig_1492	0	954	130.752	1081	1081	130.752	contig_1492	0	954	108.203	1051	1051	108.203	contig_1492	0	954	114.205	10.4807	88	88	10.4807	contig_1492	0	954	27.8223	208	208	27.8223
contig_5031	72.6921	56.5551	63.6548	84.1146	63.6548	84.1146	64.1563	6.14081e-06	8.0751e-05	Glycolipid transfer (GLTP) family	804	gi|1032292788|gb|OAP07114.1|ACD11 [Arabidopsis thaliana]	53.00%	OAP07114.1	lipid transporter activity;binding;single-organism process;response to stimulus		0.703521	6	6	0.703521	contig_5031	0	804	0.861124	6	6	0.861124	contig_5031	0	804	0.732959	6	6	0.732959	contig_5031	0	804	0.765868	2.40242	17	17	2.40242	contig_5031	0	804	5.39635	34	34	5.39635
contig_30460	98.0759	16.9693	69.5969	61.9456	69.5969	61.9456	16.7197	0.000831081	0.00331229	lateral organ boundaries-domain 16	306	gi|1032294332|gb|OAP08658.1|LBD16 [Arabidopsis thaliana]	91.00%	OAP08658.1			1.54039	5	5	1.54039	contig_30460	0	306	1.88547	5	5	1.88547	contig_30460	0	306	0	0	0	0	contig_30460	0	306	1.14195	62.0086	166	167	62.0086	contig_30460	0	306	48.3742	116	116	48.3742
contig_14574	65.7048	39.8813	53.1693	5.9482	53.1693	5.9482	33.1014	7.37281e-05	0.000507256	Late embryogenesis abundant (LEA) hydroxyproline-rich glyco family	658	gi|40824154|gb|AAR92356.1|At5g53730 [Arabidopsis thaliana]/gi|1032278335|gb|OAO92663.1|NHL26 [Arabidopsis thaliana]/gi|38566662|gb|AAR24221.1|At5g53730 [Arabidopsis thaliana]/gi|9759067|dbj|BAB09545.1|unnamed protein product [Arabidopsis thaliana]/gi|332009016|gb|AED96399.1|Late embryogenesis abundant (LEA) hydroxyproline-rich glycoprotein family [Arabidopsis thaliana]/gi|15238828|ref|NP_200184.1…	68.70%	AED96399.1;NP_200184.1;AAR24221.1;BAB09545.1;OAO92663.1;AAR92356.1	signal transducer activity;cytoplasm;plasmodesma;anchored component of plasma membrane;defense response to virus	AT5G53730	17.0492	119	119	17.0492	contig_14574	0	658	19.4656	111	111	19.4656	contig_14574	0	658	13.5831	91	91	13.5831	contig_14574	0	658	16.6993	11.5693	67	67	11.5693	contig_14574	0	658	9.69665	50	50	9.69665
contig_31958	62.7945	18.8042	53.2275	6.17796	53.2275	6.17796	30.5768	9.85688e-05	0.000634906	terpene synthase 21	469	gi|1032281785|gb|OAO96113.1|hypothetical protein AXX17_AT5G23600 [Arabidopsis thaliana]	58.80%	OAO96113.1	sesquiterpenoid biosynthetic process;sesquiterpene biosynthetic process;(-)-E-beta-caryophyllene synthase activity;alpha-humulene synthase activity;response to herbivore		11.0553	55	55	11.0553	contig_31958	0	469	9.10331	37	37	9.10331	contig_31958	0	469	10.6803	51	51	10.6803	contig_31958	0	469	10.2796	47.2409	195	195	47.2409	contig_31958	0	469	45.7103	168	168	45.7103
contig_6888	223.471	188.229	-206.228	-11.3582	-206.228	-11.3582	23.4294	0.000257121	0.00131884	---NA---	632						230.757	1538	1547	230.757	contig_6888	0	632	235.528	1287	1290	235.528	contig_6888	0	632	212.129	1360	1365	212.129	contig_6888	0	632	226.138	128.003	710	712	128.003	contig_6888	0	632	21.6045	106	107	21.6045
contig_17329	87.3883	30.7656	71.4371	9.56585	71.4371	9.56585	29.8769	0.000107246	0.000674258	DNA ligase	356	gi|52354231|gb|AAU44436.1|hypothetical protein AT1G75150 [Arabidopsis thaliana]	88.00%	AAU44436.1	nucleus		7.14983	27	27	7.14983	contig_17329	0	356	10.6963	33	33	10.6963	contig_17329	0	356	7.17311	26	26	7.17311	contig_17329	0	356	8.33975	39.8948	125	125	39.8948	contig_17329	0	356	53.7674	150	150	53.7674
contig_5676	97.4109	36.9239	79.4564	15.8295	79.4564	15.8295	46.0868	2.15394e-05	0.000202777	lectin receptor	550	"gi|1769897|emb|CAA69271.1|lectin receptor kinase, partial [Arabidopsis thaliana]"	68.30%	CAA69271.1			3.77087	22	22	3.77087	contig_5676	0	550	5.87443	28	28	5.87443	contig_5676	0	550	6.42871	36	36	6.42871	contig_5676	0	550	5.35801	50.1996	243	243	50.1996	contig_5676	0	550	39.6745	171	171	39.6745
contig_12513	207.658	172.82	-191.943	-4.84625	-191.943	-4.84625	679.528	5.7367e-10	1.76574e-07	Plant invertase pectin methylesterase inhibitor superfamily	861	gi|21618088|gb|AAM67138.1|ripening-related protein-like [Arabidopsis thaliana]	63.50%	AAM67138.1	shade avoidance		238.472	2178	2178	238.472	contig_12513	0	861	234.4	1749	1749	234.4	contig_12513	0	861	252.671	2215	2215	252.671	contig_12513	0	861	241.847	170.365	1291	1291	170.365	contig_12513	0	861	167.328	1129	1129	167.328
contig_11564	89.5464	48.983	69.2173	13.3878	69.2173	13.3878	14.2576	0.00141786	0.00507406	---NA---	449						3.35935	16	16	3.35935	contig_11564	0	449	3.34093	13	13	3.34093	contig_11564	0	449	10.0623	46	46	10.0623	contig_11564	0	449	5.58752	23.7869	94	94	23.7869	contig_11564	0	449	38.3676	135	135	38.3676
contig_2910	114.097	44.3402	99.8714	5.41515	99.8714	5.41515	52.3179	1.3348e-05	0.000142295	heat shock 60-2	914	"gi|34098917|gb|AAQ56841.1|At3g23990 [Arabidopsis thaliana]/gi|332643321|gb|AEE76842.1|heat shock protein 60 [Arabidopsis thaliana]/gi|9294668|dbj|BAB03017.1|chaperonin hsp60, mitochondrial precursor (HSP60) [Arabidopsis thaliana]/gi|12644189|sp|P29197.2|CH60A_ARATHRecName: Full=Chaperonin CPN60, mitochondrial AltName: Full=HSP60 Flags: Precursor/gi|20466256|gb|AAM20445.1|mitochondrial chaperonin…	87.90%	AAQ56841.1;NP_189041.1;AAM20445.1;BAB03017.1;OAP03825.1;P29197.2;AEE76842.1	copper ion binding;ATP binding;nucleolus;mitochondrial matrix;vacuolar membrane;Golgi apparatus;plasma membrane;'de novo' protein folding;inflammatory response;response to heat;chloroplast stroma;response to cytokinin;chloroplast envelope;cytosolic ribosome;protein refolding;protein binding involved in protein folding;protein import into mitochondrial intermembrane space;response to cadmium ion;u…	HSP60	22.3818	217	217	22.3818	contig_2910	0	914	23.9871	190	190	23.9871	contig_2910	0	914	21.4916	200	200	21.4916	contig_2910	0	914	22.6202	102.184	822	822	102.184	contig_2910	0	914	129.702	929	929	129.702
contig_3447	86.6354	39.0492	50.7514	5.13853	50.7514	5.13853	7.90826	0.00888788	0.0223772	RPM1-interacting 4	334	gi|149939775|gb|ABR46094.1|RPM1-interacting protein 4 [Arabidopsis thaliana]	51.40%	ABR46094.1	immune system process;cellular process;membrane;cell part;response to stimulus		17.4996	42	62	17.4996	contig_3447	0	334	9.67346	13	28	9.67346	contig_3447	0	334	14.409	34	49	14.409	contig_3447	0	334	13.8607	12.9269	19	38	12.9269	contig_3447	0	334	12.2259	24	32	12.2259
contig_8216	310.218	219.036	-250.591	-4.98511	-250.591	-4.98511	12.8563	0.0019903	0.00666638	glutamine-dependent asparagine synthase 1	421	gi|332644744|gb|AEE78265.1|glutamine-dependent asparagine synthase 1 [Arabidopsis thaliana]/gi|30692853|ref|NP_850664.1|glutamine-dependent asparagine synthase 1 [Arabidopsis thaliana]	92.10%	NP_850664.1;AEE78265.1	asparagine synthase (glutamine-hydrolyzing) activity;aspartate-ammonia ligase activity;ATP binding;cytosol;glutamine metabolic process;cellular amino acid catabolic process;plasmodesma;response to absence of light;response to sucrose;response to glucose;response to fructose;hyperosmotic salinity response;protein homodimerization activity;cellular response to sucrose starvation;L-asparagine biosyn…	ASN1	293.116	1309	1309	293.116	contig_8216	0	421	283.132	1033	1033	283.132	contig_8216	0	421	364.171	1561	1561	364.171	contig_8216	0	421	313.473	229.4	850	850	229.4	contig_8216	0	421	53.953	178	178	53.953
contig_3967	74.7643	63.5989	66.786	25.98	66.786	25.98	129.167	4.08628e-07	1.18541e-05	Disease resistance (CC-NBS-LRR class) family	3149	gi|440572053|gb|AGC12572.1|RPM1 [Arabidopsis thaliana]/gi|440572062|gb|AGC12578.1|RPM1 [Arabidopsis thaliana]/gi|440572068|gb|AGC12582.1|RPM1 [Arabidopsis thaliana]/gi|440572059|gb|AGC12576.1|RPM1 [Arabidopsis thaliana]	52.20%	AGC12572.1;AGC12582.1;AGC12578.1;AGC12576.1	immune system process;binding;plasma membrane;defense response;response to light stimulus;response to salicylic acid;response to other organism;cellular response to stimulus		3.32302	111	111	3.32302	contig_3967	0	3149	2.0154	55	55	2.0154	contig_3967	0	3149	2.68232	86	86	2.68232	contig_3967	0	3149	2.67358	8.22657	228	228	8.22657	contig_3967	0	3149	5.51117	136	136	5.51117
contig_7223	501.998	298.08	-408.292	-9.68356	-408.292	-9.68356	52.1937	1.34687e-05	0.000143137	Phosphate-responsive 1 family	464	gi|15236667|ref|NP_192634.1|Phosphate-responsive 1 family protein [Arabidopsis thaliana]/gi|332657300|gb|AEE82700.1|Phosphate-responsive 1 family protein [Arabidopsis thaliana]/gi|20271142|gb|AAM18526.1|AF496655_1cell cycle-related protein [Arabidopsis thaliana]/gi|20259894|gb|AAM13294.1|unknown protein [Arabidopsis thaliana]/gi|7267537|emb|CAB78019.1|putative phi-1-like phosphate-induced protein…	67.10%	AAD17365.1;AAM13294.1;AAK96677.1;NP_192634.1;AEE82700.1;AAM18526.1;Q9ZPE7.1;CAB78019.1	response to hypoxia;extracellular region;Golgi apparatus;cytosol;plant-type cell wall;plasmodesma;chloroplast;response to brassinosteroid;membrane;growth;defense response to fungus	EXO	354.738	1745	1746	354.738	contig_7223	0	464	530.697	2133	2134	530.697	contig_7223	0	464	480.499	2265	2270	480.499	contig_7223	0	464	455.311	80.3179	328	328	80.3179	contig_7223	0	464	77.0048	279	280	77.0048
contig_76	225.815	168.635	-204.264	-5.94925	-204.264	-5.94925	217.223	5.2971e-08	2.90892e-06	NAC transcription factor-like 9	2183	gi|332661133|gb|AEE86533.1|NAC transcription factor-like 9 [Arabidopsis thaliana]/gi|42567421|ref|NP_567986.3|NAC transcription factor-like 9 [Arabidopsis thaliana]/gi|1032282580|gb|OAO96907.1|NTL9 [Arabidopsis thaliana]/gi|803374879|sp|F4JN35.1|NTL9_ARATHRecName: Full=Protein NTM1-like 9 AltName: Full=Calmodulin-binding NAC protein	61.70%	OAO96907.1;NP_567986.3;F4JN35.1;AEE86533.1	"positive regulation of defense response to virus by host;response to molecule of bacterial origin;transcription factor activity, sequence-specific DNA binding;transcription coactivator activity;nucleus;plasma membrane;regulation of transcription, DNA-templated;defense response, incompatible interaction;response to chitin;endomembrane system;viral process;protein self-association;transcription re…	NTL9	263.814	5990	6109	263.814	contig_76	0	2183	223.539	4133	4229	223.539	contig_76	0	2183	249.253	5405	5540	249.253	contig_76	0	2183	245.536	44.605	840	857	44.605	contig_76	0	2183	41.211	689	705	41.211
contig_27151	72.7177	15.5037	65.2577	24.2406	65.2577	24.2406	93.4663	1.44082e-06	2.82563e-05	Galactosyl transferase GMA12 MNN10 family	682	"gi|16323414|gb|AAL15201.1|unknown protein [Arabidopsis thaliana]/gi|591402236|gb|AHL38845.1|glycosyltransferase, partial [Arabidopsis thaliana]/gi|18400116|ref|NP_565544.1|Galactosyl transferase GMA12/MNN10 family protein [Arabidopsis thaliana]/gi|330252276|gb|AEC07370.1|Galactosyl transferase GMA12/MNN10 family protein [Arabidopsis thaliana]/gi|14334702|gb|AAK59529.1|unknown protein [Arabidopsi…	64.40%	O81007.1;AAC32437.1;CAC01675.1;NP_565544.1;AHL38845.1;AEC07370.1;AAL15201.1;AAK59529.1	Golgi membrane;protein binding;endosome;trans-Golgi network;galactosyltransferase activity;mucilage biosynthetic process;seed coat development;galactoglucomannan metabolic process;xyloglucan metabolic process;xyloglucan 6-xylosyltransferase activity;UDP-xylosyltransferase activity;root hair elongation;galactomannan biosynthetic process	AT2G22900	3.45571	25	25	3.45571	contig_27151	0	682	3.38389	20	20	3.38389	contig_27151	0	682	1.58414	11	11	1.58414	contig_27151	0	682	2.80791	59.9756	360	360	59.9756	contig_27151	0	682	57.068	305	305	57.068
contig_148	63.1429	26.217	-57.3927	-4.88783	-57.3927	-4.88783	86.1867	1.97243e-06	3.54657e-05	alpha beta-Hydrolases superfamily	934	gi|13877687|gb|AAK43921.1|AF370602_1putative phospholipase [Arabidopsis thaliana]/gi|3355471|gb|AAC27833.1|putative phospholipase [Arabidopsis thaliana]	81.90%	AAC27833.1;AAK43921.1	nucleus;endoplasmic reticulum;Golgi apparatus;cytosol;plasma membrane;acylglycerol lipase activity		74.8926	742	742	74.8926	contig_148	0	934	72.2735	585	585	72.2735	contig_148	0	934	69.2983	659	659	69.2983	contig_148	0	934	72.1548	19.2206	158	158	19.2206	contig_148	0	934	11.7498	86	86	11.7498
contig_30793	127.694	51.8601	103.44	97.506	103.44	97.506	22.3187	0.000305375	0.00150308	cellulase 5	629	gi|21554174|gb|AAM63253.1|putative beta-glucanase [Arabidopsis thaliana]	76.80%	AAM63253.1	extracellular region;Golgi apparatus;cytosol;plasma membrane;pattern specification process;cellulase activity;plant-type cell wall;plasmodesma;response to nematode;cellulose catabolic process;cell wall organization		1.04913	7	7	1.04913	contig_30793	0	629	0.917254	5	5	0.917254	contig_30793	0	629	1.24918	8	8	1.24918	contig_30793	0	629	1.07185	85.4412	473	473	85.4412	contig_30793	0	629	73.4405	362	362	73.4405
contig_20641	3101.64	2766.71	-2908.71	-49.2445	-2908.71	-49.2445	921.237	1.70595e-10	8.7268e-08	photosystem II type I chlorophyll a b binding	557	gi|1032301447|gb|OAP15772.1|hypothetical protein AXX17_AT1G30310 [Arabidopsis thaliana]	95.50%	OAP15772.1	"protein binding;mitochondrion;Golgi apparatus;photosystem I;photosystem II;chloroplast thylakoid membrane;response to blue light;response to fructose;photosynthesis, light harvesting in photosystem I;photosynthesis, light harvesting in photosystem II;chloroplast envelope;response to red light;response to far red light;plastoglobule;integral component of membrane;chlorophyll binding;protein-chrom…		2838.99	15992	16774	2838.99	contig_20641	0	557	2921.22	13386	14101	2921.22	contig_20641	0	557	3146.81	17004	17846	3146.81	contig_20641	0	557	2969.01	185.22	851	908	185.22	contig_20641	0	557	119.819	491	523	119.819
contig_9635	67.8785	49.4535	54.7433	4.69272	54.7433	4.69272	33.9498	6.71778e-05	0.000471751	Fe(II) transport	1103	gi|1032301629|gb|OAP15954.1|ZIP10 [Arabidopsis thaliana]	70.00%	OAP15954.1	iron ion transmembrane transporter activity;manganese ion transmembrane transporter activity;zinc ion transmembrane transporter activity;protein binding;endosome;trans-Golgi network;plasma membrane;iron ion transport;manganese ion transport;cellular iron ion homeostasis;response to bacterium;cadmium ion transmembrane transporter activity;copper uptake transmembrane transporter activity;nickel cat…		18.6322	218	218	18.6322	contig_9635	0	1103	32.9538	315	315	32.9538	contig_9635	0	1103	17.3637	195	195	17.3637	contig_9635	0	1103	22.9832	4.01741	39	39	4.01741	contig_9635	0	1103	20.8245	180	180	20.8245
contig_7655	169.768	136.04	154.322	4.22859	154.322	4.22859	324.213	1.08643e-08	1.09914e-06	Subtilase family	661	"gi|757534|emb|CAA59963.1|subtilisin-like protease, partial [Arabidopsis thaliana]"	64.70%	CAA59963.1	serine-type endopeptidase activity;nucleus;Golgi apparatus;proteolysis;plant-type cell wall;plasmodesma;response to jasmonic acid;apoplast;mucilage metabolic process involved in seed coat development;mucilage extrusion from seed coat		44.9253	315	315	44.9253	contig_7655	0	661	50.6252	290	290	50.6252	contig_7655	0	661	47.8452	322	322	47.8452	contig_7655	0	661	47.7986	214.693	1249	1249	214.693	contig_7655	0	661	192.088	995	995	192.088
contig_7097	61.0364	45.6693	54.439	10.5405	54.439	10.5405	218.758	5.1519e-08	2.86631e-06	2-oxoglutarate (2OG) and Fe(II)-dependent oxygenase superfamily	464	gi|110736975|dbj|BAF00443.1|putative 1-aminocyclopropane-1-carboxylate oxidase [Arabidopsis thaliana]	77.00%	BAF00443.1	"cytosol;oxidoreductase activity, acting on paired donors, with incorporation or reduction of molecular oxygen, 2-oxoglutarate as one donor, and incorporation of one atom each of oxygen into both donors;oxidation-reduction process"		6.70468	33	33	6.70468	contig_7097	0	464	5.96848	24	24	5.96848	contig_7097	0	464	4.44514	21	21	4.44514	contig_7097	0	464	5.7061	8.32564	34	34	8.32564	contig_7097	0	464	8.52553	31	31	8.52553
contig_6984	216.909	169.408	-200.136	-5.12782	-200.136	-5.12782	297.47	1.52809e-08	1.33736e-06	N-acetylglucosamine-1-phosphate uridylyltransferase 1	781	gi|15226877|ref|NP_181047.1|N-acetylglucosamine-1-phosphate uridylyltransferase 2 [Arabidopsis thaliana]/gi|1032295154|gb|OAP09480.1|GlcNAc1pUT2 [Arabidopsis thaliana]/gi|6136087|sp|O64765.1|UAP2_ARATHRecName: Full=UDP-N-acetylglucosamine diphosphorylase 2 AltName: Full=N-acetylglucosamine-1-phosphate uridylyltransferase 2 AltName: Full=UDP-N-acetylgalactosamine diphosphorylase 2 AltName: Full=UT…	69.00%	AAC12841.1;AEC09050.1;O64765.1;OAP09480.1;AAL58890.1;ADF80195.1;NP_181047.1;AAV85735.1	UDP-N-acetylglucosamine diphosphorylase activity;UTP:glucose-1-phosphate uridylyltransferase activity;cytosol;plasma membrane;UDP-glucose metabolic process;UDP-N-acetylglucosamine biosynthetic process;chloroplast;embryo sac development;pollen development;response to abscisic acid;embryo development ending in seed dormancy;UDP-N-acetylgalactosamine metabolic process;UDP-N-acetylgalactosamine dipho…	GlcNAc1pUT2	227.411	1884	1884	227.411	contig_6984	0	781	254.864	1725	1725	254.864	contig_6984	0	781	263.587	2096	2096	263.587	contig_6984	0	781	248.621	59.5016	409	409	59.5016	contig_6984	0	781	58.0036	355	355	58.0036
contig_921	213.1	178.619	-187.437	-4.22437	-187.437	-4.22437	257.029	2.72473e-08	1.9216e-06	kinase superfamily	1226	"gi|334186242|ref|NP_001190642.1|receptor-like kinase [Arabidopsis thaliana]/gi|1039016692|gb|AEE81851.2|receptor-like kinase [Arabidopsis thaliana]/gi|1182267440|gb|ARJ31393.1|receptor-like kinase, partial [Arabidopsis thaliana]/gi|110737285|dbj|BAF00589.1|hypothetical protein [Arabidopsis thaliana]"	60.50%	BAF00589.1;NP_001190642.1;ARJ31393.1;AEE81851.2	protein kinase activity;endoplasmic reticulum;plasma membrane;plasmodesma;plant-type vacuole membrane;brassinosteroid mediated signaling pathway;post-embryonic development;unidimensional cell growth;regulation of unidimensional cell growth;regulation of calcium ion transport;root hair cell development;cellular ammonia homeostasis	AT4G00300	237.833	3093	3093	237.833	contig_921	0	1226	238.028	2529	2529	238.028	contig_921	0	1226	260.842	3256	3256	260.842	contig_921	0	1226	245.568	62.7415	677	677	62.7415	contig_921	0	1226	73.9002	710	710	73.9002
contig_1354	693.174	555.591	-619.907	-11.7751	-619.907	-11.7751	183.367	1.033e-07	4.55324e-06	---NA---	458						615.031	2980	2988	615.031	contig_1354	0	458	739.205	2926	2934	739.205	contig_1354	0	458	678.08	3149	3162	678.08	contig_1354	0	458	677.439	98.2396	391	396	98.2396	contig_1354	0	458	143.211	510	514	143.211
contig_2787	54.5009	19.9999	48.4316	5.2891	48.4316	5.2891	41.5784	3.16796e-05	0.000270285	MYB transcription factor Atmyb2	1882	gi|75333827|sp|Q9FGY3.1|MYB78_ARATHRecName: Full=Transcription factor MYB78 AltName: Full=Myb-related protein 78 Short=AtMYB78/gi|15240518|ref|NP_199773.1|myb domain protein 78 [Arabidopsis thaliana]/gi|332008453|gb|AED95836.1|myb domain protein 78 [Arabidopsis thaliana]/gi|109946507|gb|ABG48432.1|At5g49620 [Arabidopsis thaliana]/gi|10177629|dbj|BAB10776.1|myb-related transcription factor [Arabid…	92.20%	BAB10776.1;Q9FGY3.1;ABG48432.1;NP_199773.1;AED95836.1;AAS10105.1	"RNA polymerase II transcription factor activity, sequence-specific DNA binding;core promoter sequence-specific DNA binding;transcription factor activity, RNA polymerase II transcription factor recruiting;calmodulin binding;nucleus;transcription, DNA-templated;regulation of transcription from RNA polymerase II promoter;defense response;response to water deprivation;response to fungus;response to …	MYB78	42.1268	841	841	42.1268	contig_2787	0	1882	43.2868	705	706	43.2868	contig_2787	0	1882	44.9332	861	861	44.9332	contig_2787	0	1882	43.4489	14.0667	233	233	14.0667	contig_2787	0	1882	10.7809	159	159	10.7809
contig_34811	205.911	81.3141	170.495	140.422	170.495	140.422	43.0591	2.7794e-05	0.000245601	indole-3-acetic acid inducible	586	gi|2864615|emb|CAA16962.1|putative protein [Arabidopsis thaliana]/gi|7270132|emb|CAB79946.1|putative protein [Arabidopsis thaliana]	46.70%	CAA16962.1;CAB79946.1	response to stimulus		0.643494	4	4	0.643494	contig_34811	0	586	1.18147	6	6	1.18147	contig_34811	0	586	1.84365	11	11	1.84365	contig_34811	0	586	1.22287	134.173	692	692	134.173	contig_34811	0	586	174.426	801	801	174.426
contig_4069	51.9809	25.2083	46.1633	4.05266	46.1633	4.05266	135.714	3.36744e-07	1.03561e-05	catalytics	1904	gi|332197511|gb|AEE35632.1|catalytics [Arabidopsis thaliana]/gi|30699045|ref|NP_177617.2|catalytics [Arabidopsis thaliana]/gi|34395733|sp|Q9SSG3.2|HIPL1_ARATHRecName: Full=HIPL1 protein Flags: Precursor	75.00%	NP_177617.2;AEE35632.1;Q9SSG3.2	"carbohydrate metabolic process;oxidoreductase activity, acting on the CH-OH group of donors, quinone or similar compound as acceptor;anchored component of plasma membrane;quinone binding;oxidation-reduction process"	AT1G74790	15.646	316	316	15.646	contig_4069	0	1904	15.9995	264	264	15.9995	contig_4069	0	1904	13.7214	266	266	13.7214	contig_4069	0	1904	15.1223	36.2225	607	607	36.2225	contig_4069	0	1904	40.4807	604	604	40.4807
contig_5816	137.718	96.7488	117.646	22.9544	117.646	22.9544	40.0631	3.63854e-05	0.000300147	PLAC8 family	444	gi|1063683446|ref|NP_001320690.1|PLANT CADMIUM RESISTANCE 2 [Arabidopsis thaliana]/gi|1039008082|gb|ANM58240.1|PLANT CADMIUM RESISTANCE 2 [Arabidopsis thaliana]	76.90%	NP_001320690.1;ANM58240.1	vacuole;plasma membrane;response to oxidative stress;integral component of membrane;pollen sperm cell differentiation	PCR2	5.94507	28	28	5.94507	contig_5816	0	444	4.15822	16	16	4.15822	contig_5816	0	444	5.97262	27	27	5.97262	contig_5816	0	444	5.35864	4.86214	19	19	4.86214	contig_5816	0	444	9.19697	32	32	9.19697
contig_2528	210.527	158.53	-195.242	-8.13415	-195.242	-8.13415	138.496	3.11021e-07	9.7408e-06	NDR1 HIN1-like 3	730	gi|1032276738|gb|OAO91066.1|NHL3 [Arabidopsis thaliana]/gi|332003619|gb|AED91002.1|NDR1/HIN1-like 3 [Arabidopsis thaliana]/gi|15239999|ref|NP_196250.1|NDR1/HIN1-like 3 [Arabidopsis thaliana]/gi|24030178|gb|AAN41271.1|putative harpin-induced protein [Arabidopsis thaliana]/gi|75171857|sp|Q9FNH6.1|NHL3_ARATHRecName: Full=NDR1/HIN1-like protein 3/gi|9758412|dbj|BAB08954.1|harpin-induced protein-like …	64.40%	AAN41271.1;Q9FNH6.1;BAB08954.1;OAO91066.1;NP_196250.1;AED91002.1	"vacuolar membrane;Golgi apparatus;plasma membrane;plasmodesma;response to wounding;response to salicylic acid;defense response to bacterium, incompatible interaction;intrinsic component of membrane;defense response to virus"	NHL3	228.706	1771	1771	228.706	contig_2528	0	730	205.016	1297	1297	205.016	contig_2528	0	730	234.105	1740	1740	234.105	contig_2528	0	730	222.609	24.4362	157	157	24.4362	contig_2528	0	730	34.087	195	195	34.087
contig_1312	325.157	306.473	-311.796	-7.30265	-311.796	-7.30265	644.089	7.10065e-10	2.09671e-07	Cold acclimation WCOR413 family	355	gi|15810635|gb|AAL07242.1|putative cold acclimation protein [Arabidopsis thaliana]/gi|4835234|emb|CAB42912.1|putative cold acclimation protein [Arabidopsis thaliana]/gi|332645194|gb|AEE78715.1|cold-regulated 413-plasma membrane 2 [Arabidopsis thaliana]/gi|13430786|gb|AAK26015.1|AF360305_1putative cold acclimation protein [Arabidopsis thaliana]/gi|75212080|sp|Q9SVL6.1|CRPM2_ARATHRecName: Full=Cold…	69.60%	AEE78715.1;AAG13394.1;NP_190652.1;OAP05605.1;Q9SVL6.1;CAB42912.1;AAL07242.1;AAK26015.1	mitochondrion;vacuolar membrane;plasma membrane;chloroplast thylakoid membrane;cold acclimation;response to abscisic acid;response to sucrose;response to glucose;response to fructose;integral component of chloroplast inner membrane;cellular response to water deprivation;cellular response to cold	COR413-PM2	355.843	1257	1340	355.843	contig_1312	0	355	357.223	1035	1099	357.223	contig_1312	0	355	370.733	1265	1340	370.733	contig_1312	0	355	361.266	48.9688	139	153	48.9688	contig_1312	0	355	57.5134	151	160	57.5134
contig_2130	72.8554	58.634	67.8093	161.021	67.8093	161.021	95.9044	1.30384e-06	2.61489e-05	1-aminocyclopropane-1-carboxylate synthase	1574	gi|1032288855|gb|OAP03182.1|AT-ACS1 [Arabidopsis thaliana]	76.20%	OAP03182.1	vasculature development;cysteine synthase activity;mitochondrion;endosome;trans-Golgi network;cysteine biosynthetic process from serine;response to oxidative stress;chromoplast;double fertilization forming a zygote and endosperm;chloroplast stroma;response to wounding;response to mechanical stimulus;ethylene biosynthetic process;response to ethylene;response to auxin;response to cytokinin;respons…		0.299466	5	5	0.299466	contig_2130	0	1574	0.659793	9	9	0.659793	contig_2130	0	1574	0.311996	5	5	0.311996	contig_2130	0	1574	0.423752	8.80667	122	122	8.80667	contig_2130	0	1574	14.4309	178	178	14.4309
contig_29568	56.2381	49.8361	52.4151	9.41784	52.4151	9.41784	68.9087	4.67034e-06	6.57723e-05	leucine-rich repeat FLR1	404	gi|12322044|gb|AAG51067.1|AC069472_7unknown protein 756-145 [Arabidopsis thaliana]	56.80%	AAG51067.1	Golgi apparatus;plasma membrane;signal transduction;transcription factor binding;plant-type cell wall;plasmodesma;vegetative to reproductive phase transition of meristem;polygalacturonase inhibitor activity		5.13362	22	22	5.13362	contig_29568	0	404	7.71174	27	27	7.71174	contig_29568	0	404	5.83464	24	24	5.83464	contig_29568	0	404	6.22667	27.2802	97	97	27.2802	contig_29568	0	404	12.3186	39	39	12.3186
contig_2831	70.7889	54.0156	57.7124	87.799	57.7124	87.799	27.072	0.00015329	0.000887015	---NA---	398						1.18432	5	5	1.18432	contig_2831	0	398	0.869778	3	3	0.869778	contig_2831	0	398	0.246775	1	1	0.246775	contig_2831	0	398	0.766958	0	0	0	0	contig_2831	0	398	0.320623	1	1	0.320623
contig_9066	96.782	79.0868	90.2401	19.006	90.2401	19.006	102.27	1.0158e-06	2.1805e-05	alpha beta-Hydrolases superfamily	917	gi|1032290556|gb|OAP04883.1|hypothetical protein AXX17_AT3G25100 [Arabidopsis thaliana]	65.10%	OAP04883.1	nucleus;cytosol;plasma membrane;response to salt stress;apoplast		4.5234	44	44	4.5234	contig_9066	0	917	7.29842	58	58	7.29842	contig_9066	0	917	3.21319	30	30	3.21319	contig_9066	0	917	5.01167	6.07132	49	49	6.07132	contig_9066	0	917	10.1585	73	73	10.1585
contig_13829	53.5702	48.1704	50.2409	7.35075	50.2409	7.35075	727.387	4.37442e-10	1.48447e-07	multidrug resistance-associated 3	1732	gi|42572409|ref|NP_974300.1|multidrug resistance-associated protein 3 [Arabidopsis thaliana]/gi|332641773|gb|AEE75294.1|multidrug resistance-associated protein 3 [Arabidopsis thaliana]/gi|332641772|gb|AEE75293.1|multidrug resistance-associated protein 3 [Arabidopsis thaliana]/gi|42572407|ref|NP_974299.1|multidrug resistance-associated protein 3 [Arabidopsis thaliana]	65.00%	AEE75294.1;AEE75293.1;NP_974299.1;NP_974300.1	plant-type vacuole;vacuolar membrane;plasmodesma;chlorophyll catabolite transmembrane transporter activity;glutathione S-conjugate-exporting ATPase activity;apoplast;response to other organism;transmembrane transport	ABCC3	7.40241	136	136	7.40241	contig_13829	0	1732	7.99473	120	120	7.99473	contig_13829	0	1732	8.33592	147	147	8.33592	contig_13829	0	1732	7.91102	7.67529	117	117	7.67529	contig_13829	0	1732	11.6409	158	158	11.6409
contig_5635	61.7527	28.0221	57.0609	8.25065	57.0609	8.25065	65.6732	5.61552e-06	7.53717e-05	sequence-specific DNA binding transcription factor	308	gi|30681119|ref|NP_187615.2|sequence-specific DNA binding transcription factor [Arabidopsis thaliana]/gi|332641332|gb|AEE74853.1|sequence-specific DNA binding transcription factor [Arabidopsis thaliana]/gi|1032289632|gb|OAP03959.1|hypothetical protein AXX17_AT3G09740 [Arabidopsis thaliana]/gi|23270391|gb|AAM13849.2|unknown protein [Arabidopsis thaliana]	88.00%	OAP03959.1;AEE74853.1;NP_187615.2;AAM13849.2	"transcription factor activity, sequence-specific DNA binding;protein binding;nucleus;plasma membrane;regulation of transcription, DNA-templated;negative regulation of gene expression;regulation of cellular response to hypoxia"	AT3G10040	9.79448	30	32	9.79448	contig_5635	0	308	7.11825	17	19	7.11825	contig_5635	0	308	6.69658	17	21	6.69658	contig_5635	0	308	7.86977	36.152	86	98	36.152	contig_5635	0	308	35.2165	79	85	35.2165
contig_8107	135.108	51.9144	-105.551	-6.28671	-105.551	-6.28671	36.7728	5.00231e-05	0.000380889	Calcium-binding EF-hand family	794	gi|1039017547|gb|ANM66911.1|Calcium-binding EF-hand family protein [Arabidopsis thaliana]/gi|1032285981|gb|OAP00309.1|hypothetical protein AXX17_AT4G15240 [Arabidopsis thaliana]/gi|1063722196|ref|NP_001328777.1|Calcium-binding EF-hand family protein [Arabidopsis thaliana]	52.00%	NP_001328777.1;OAP00309.1;ANM66911.1		AT4G13440	116.593	949	982	116.593	contig_8107	0	794	106.816	706	735	106.816	contig_8107	0	794	153.139	1178	1238	153.139	contig_8107	0	794	125.516	18.0305	118	126	18.0305	contig_8107	0	794	19.768	117	123	19.768
contig_5443	180.611	126.351	-162.198	-4.15554	-162.198	-4.15554	95.5565	1.32236e-06	2.64618e-05	Malectin receptor kinase family	412	gi|8247189|emb|CAB92960.1|putative serine threonine kinase [Arabidopsis thaliana]	93.70%	CAB92960.1	protein serine/threonine kinase activity;protein binding;ATP binding;extracellular region;single fertilization;plasmodesma;abscisic acid-activated signaling pathway;brassinosteroid mediated signaling pathway;negative regulation of abscisic acid-activated signaling pathway;post-embryonic development;pollen tube growth;ethylene-activated signaling pathway;pollen tube reception;integral component of…		228.815	1000	1000	228.815	contig_5443	0	412	182.888	653	653	182.888	contig_5443	0	412	229.092	961	961	229.092	contig_5443	0	412	213.599	77.4936	281	281	77.4936	contig_5443	0	412	72.7861	235	235	72.7861
contig_4326	155.703	117.706	-147.539	-7.58115	-147.539	-7.58115	226.917	4.45849e-08	2.62877e-06	WRKY DNA-binding 60	715	gi|222423740|dbj|BAH19836.1|AT1G80840 [Arabidopsis thaliana]	79.10%	BAH19836.1	"response to molecule of bacterial origin;transcription factor activity, sequence-specific DNA binding;nucleus;transcription, DNA-templated;response to wounding;response to salicylic acid;response to chitin;defense response to bacterium;identical protein binding;sequence-specific DNA binding;transcription regulatory region DNA binding;negative regulation of transcription, DNA-templated;regulation…		176.941	1342	1342	176.941	contig_4326	0	715	161.224	999	999	161.224	contig_4326	0	715	171.707	1250	1250	171.707	contig_4326	0	715	169.957	22.5652	142	142	22.5652	contig_4326	0	715	21.2382	119	119	21.2382
contig_24229	141.552	72.3282	97.1868	31.278	97.1868	31.278	13.1958	0.00182843	0.00622153	---NA---	309						4.5763	15	15	4.5763	contig_24229	0	309	1.86716	5	5	1.86716	contig_24229	0	309	4.13208	13	13	4.13208	contig_24229	0	309	3.52518	5.51556	15	15	5.51556	contig_24229	0	309	1.23891	3	3	1.23891
contig_2323	175.5	134.797	-152.563	-4.66733	-152.563	-4.66733	42.7685	2.85076e-05	0.000250701	rapid alkalinization factor 23	912	gi|18252281|gb|AAL62021.1|AT3g16570/MGL6_2 [Arabidopsis thaliana]/gi|1063711949|ref|NP_001327214.1|rapid alkalinization factor 23 [Arabidopsis thaliana]/gi|21536821|gb|AAM61153.1|unknown [Arabidopsis thaliana]/gi|1039015703|gb|ANM65229.1|rapid alkalinization factor 23 [Arabidopsis thaliana]/gi|75274291|sp|Q9LUS7.1|RLF23_ARATHRecName: Full=Rapid alkalinization factor 23 Short=AtRALF23 AltName: Ful…	64.43%	BAB02748.1;ANM65230.1;AAK82563.1;NP_001327215.1;NP_001327214.1;AAM61153.1;AAL62021.1;OAP01815.1;NP_001319570.1;ANM65229.1;Q9LUS7.1;AEE75839.1	plant-type cell wall;plasmodesma;response to brassinosteroid;negative regulation of growth	RALF23	191.955	1857	1857	191.955	contig_2323	0	912	206.488	1632	1632	206.488	contig_2323	0	912	184.048	1709	1709	184.048	contig_2323	0	912	194.164	53.3219	428	428	53.3219	contig_2323	0	912	73.0387	522	522	73.0387
contig_8484	80.447	66.0795	74.6892	22.6484	74.6892	22.6484	40.5307	3.48452e-05	0.000289815	GDSL-like Lipase Acylhydrolase superfamily	343	gi|7573470|emb|CAB87784.1|early nodule-specific protein-like [Arabidopsis thaliana]/gi|26451820|dbj|BAC43003.1|putative early nodule-specific protein [Arabidopsis thaliana]/gi|15241404|ref|NP_196949.1|GDSL-like Lipase/Acylhydrolase superfamily protein [Arabidopsis thaliana]/gi|28950957|gb|AAO63402.1|At5g14450 [Arabidopsis thaliana]/gi|75181027|sp|Q9LY84.1|GDL76_ARATHRecName: Full=GDSL esterase/li…	60.60%	AAO63402.1;CAB87784.1;AED92036.1;NP_196949.1;Q9LY84.1;BAC43003.1	"extracellular region;plant-type cell wall;plasmodesma;hydrolase activity, acting on ester bonds"	AT5G14450	4.12268	15	15	4.12268	contig_8484	0	343	3.36416	10	10	3.36416	contig_8484	0	343	2.86345	10	10	2.86345	contig_8484	0	343	3.45009	11.5939	25	35	11.5939	contig_8484	0	343	11.5331	29	31	11.5331
contig_10435	173.713	151.703	-165.577	-4.40157	-165.577	-4.40157	553.945	1.294e-09	2.93737e-07	nucleotide sugar epimerase	540	"gi|11994590|dbj|BAB02645.1|unnamed protein product [Arabidopsis thaliana]/gi|15231926|ref|NP_188097.1|rhamnose biosynthesis 3 [Arabidopsis thaliana]/gi|62901052|sp|Q9LH76.1|RHM3_ARATHRecName: Full=Trifunctional UDP-glucose 4,6-dehydratase/UDP-4-keto-6-deoxy-D-glucose 3,5-epimerase/UDP-4-keto-L-rhamnose-reductase RHM3 AltName: Full=Probable rhamnose biosynthetic enzyme 3 Short=AtRHM3 Includes: Re…	70.70%	NP_188097.1;AAL84958.1;Q9LH76.1;AAM98324.1;OAP04659.1;BAB02645.1;AEE75567.1	"cytosol;carbohydrate metabolic process;dTDP-glucose 4,6-dehydratase activity;plasmodesma;chloroplast;mucilage biosynthetic process;seed coat development;UDP-rhamnose biosynthetic process;UDP-L-rhamnose synthase activity;auxin efflux;UDP-4-keto-6-deoxy-glucose-3,5-epimerase activity;UDP-4-keto-rhamnose-4-keto-reductase activity;endomembrane system;cell differentiation;regulation of cell prolifera…	RHM3	219.095	1255	1255	219.095	contig_10435	0	540	204.498	957	957	204.498	contig_10435	0	540	219.168	1205	1205	219.168	contig_10435	0	540	214.254	84.7946	403	403	84.7946	contig_10435	0	540	89.5618	379	379	89.5618
contig_12957	78.464	64.4943	69.3771	139.891	69.3771	139.891	152.895	2.11043e-07	7.34014e-06	---NA---	696						0.270896	2	2	0.270896	contig_12957	0	696	0.663164	4	4	0.663164	contig_12957	0	696	0.564462	4	4	0.564462	contig_12957	0	696	0.499508	0	0	0	0	contig_12957	0	696	0.366689	2	2	0.366689
contig_10922	196.099	111.935	170.539	7.82444	170.539	7.82444	83.7387	2.20487e-06	3.85932e-05	chaperonin 20	611	"gi|18394184|ref|NP_563961.1|chaperonin 10 [Arabidopsis thaliana]/gi|21555041|gb|AAM63762.1|chaperonin CPN10 [Arabidopsis thaliana]/gi|17380944|gb|AAL36284.1|putative chaperonin CPN10 protein [Arabidopsis thaliana]/gi|11990458|dbj|BAA13588.2|mitochondrial chaperonin 10 [Arabidopsis thaliana]/gi|6899643|gb|AAF31020.1|AC012189_2Strong similarity to 10 KD chaperonin (protein CPN10) from Arabidopsis …	75.25%	AAF31020.1;P34893.1;AAM63762.1;AAM14191.1;AAA32767.1;NP_563961.1;BAA13588.2;AAL36284.1;AEE29249.1	copper ion binding;ATP binding;mitochondrial matrix;response to unfolded protein;response to heat;response to cold;chloroplast thylakoid membrane;chloroplast stroma;chloroplast envelope;response to cadmium ion;apoplast;unfolded protein binding;chaperone mediated protein folding requiring cofactor;chaperone binding;positive regulation of superoxide dismutase activity	CPN10	30.0868	195	195	30.0868	contig_10922	0	611	23.9846	127	127	23.9846	contig_10922	0	611	20.8971	130	130	20.8971	contig_10922	0	611	24.9895	164.945	887	887	164.945	contig_10922	0	611	216.996	1039	1039	216.996
contig_5455	73.764	15.8149	57.4415	41.4019	57.4415	41.4019	23.2298	0.000265048	0.00134694	B12D	443	gi|24899711|gb|AAN65070.1|B12D-like protein [Arabidopsis thaliana]/gi|19698959|gb|AAL91215.1|B12D-like protein [Arabidopsis thaliana]/gi|5541720|emb|CAB51061.1|B12D-like protein [Arabidopsis thaliana]/gi|15228342|ref|NP_190397.1|B12D protein [Arabidopsis thaliana]/gi|1032287871|gb|OAP02198.1|hypothetical protein AXX17_AT3G42170 [Arabidopsis thaliana]/gi|222423529|dbj|BAH19734.1|AT3G48140 [Arabido…	70.83%	OAP02198.1;AAL91215.1;BAH19734.1;CAB51061.1;AEE78372.1;NP_190397.1;T13003;AAN65070.1	mitochondrion;peroxisome;leaf senescence;integral component of membrane	AT3G48140	0.851213	4	4	0.851213	contig_5455	0	443	2.0838	8	8	2.0838	contig_5455	0	443	1.33025	6	6	1.33025	contig_5455	0	443	1.42175	46.1663	180	180	46.1663	contig_5455	0	443	69.1329	240	240	69.1329
contig_17693	64.1886	20.6802	52.6505	16.2389	52.6505	16.2389	34.2687	6.49049e-05	0.000460239	terpene synthase 21	325	gi|1032276594|gb|OAO90922.1|hypothetical protein AXX17_AT5G23590 [Arabidopsis thaliana]	68.30%	OAO90922.1	peroxisome;response to wounding;sesquiterpenoid biosynthetic process;farnesyl diphosphate metabolic process;sesquiterpene biosynthetic process;(-)-E-beta-caryophyllene synthase activity;alpha-humulene synthase activity;response to herbivore		34.518	119	119	34.518	contig_17693	0	325	33.0194	93	93	33.0194	contig_17693	0	325	35.9623	119	119	35.9623	contig_17693	0	325	34.4999	6.64243	19	19	6.64243	contig_17693	0	325	2.35584	6	6	2.35584
contig_30929	236.93	117.883	179.568	12.9645	179.568	12.9645	24.5551	0.000217557	0.00116064	---NA---	494						16.4117	86	86	16.4117	contig_30929	0	494	11.9128	51	51	11.9128	contig_30929	0	494	16.7008	84	84	16.7008	contig_30929	0	494	15.0084	183.771	799	799	183.771	contig_30929	0	494	151.115	585	585	151.115
contig_13442	73.4194	55.9029	70.2933	4.49139	70.2933	4.49139	157.467	1.8799e-07	6.81903e-06	enhanced disease susceptibility 1	367	gi|1032291641|gb|OAP05968.1|hypothetical protein AXX17_AT3G42100 [Arabidopsis thaliana]	66.60%	OAP05968.1	"response to singlet oxygen;response to hypoxia;signal transducer activity;nucleus;plant-type hypersensitive response;systemic acquired resistance, salicylic acid mediated signaling pathway;regulation of hydrogen peroxide metabolic process;aerenchyma formation;positive regulation of cell death;lipase activity;protein homodimerization activity;cytoplasmic part"		35.1914	113	137	35.1914	contig_13442	0	367	34.2713	90	109	34.2713	contig_13442	0	367	34.523	104	129	34.523	contig_13442	0	367	34.6619	22.2907	66	72	22.2907	contig_13442	0	367	20.8623	50	60	20.8623
contig_2588	61.9786	9.63584	-51.3219	-11.1348	-51.3219	-11.1348	69.8463	4.43431e-06	6.33833e-05	pleiotropic drug resistance 12	2381	gi|1032302313|gb|OAP16638.1|PDR11 [Arabidopsis thaliana]	82.00%	OAP16638.1	"defense response to oomycetes;protein binding;ATP binding;plasma membrane;drug transmembrane transport;chloroplast;response to ethylene;response to salicylic acid;response to jasmonic acid;response to ozone;lead ion transport;integral component of membrane;ATPase activity, coupled to transmembrane movement of substances;abscisic acid transport"		57.9251	1463	1463	57.9251	contig_2588	0	2381	56.411	1164	1164	56.411	contig_2588	0	2381	54.8214	1329	1329	54.8214	contig_2588	0	2381	56.3858	4.05617	85	85	4.05617	contig_2588	0	2381	5.30583	99	99	5.30583
contig_6791	63.8841	28.3431	49.2426	5.29484	49.2426	5.29484	23.3275	0.000261132	0.001333	glutathione S-transferase TAU 23	375	gi|1032303693|gb|OAP18018.1|GSTU28 [Arabidopsis thaliana]	83.40%	OAP18018.1	"glutathione transferase activity;peroxidase activity;nucleus;vacuolar membrane;Golgi apparatus;cytosol;plasma membrane;glutathione metabolic process;response to oxidative stress;toxin catabolic process;chloroplast stroma;response to toxic substance;cellular response to water deprivation;glutathione binding;2,4,6-trinitrotoluene catabolic process;response to cadmium ion;oxidation-reduction proces…		15.5863	61	62	15.5863	contig_6791	0	375	12.0006	38	39	12.0006	contig_6791	0	375	6.80967	26	26	6.80967	contig_6791	0	375	11.4655	36.6616	120	121	36.6616	contig_6791	0	375	42.1957	122	124	42.1957
contig_6307	440.891	395.008	-417.242	-9.53144	-417.242	-9.53144	937.577	1.59045e-10	8.37176e-08	glutamate decarboxylase	454	gi|332642482|gb|AEE76003.1|glutamate decarboxylase 5 [Arabidopsis thaliana]/gi|9294589|dbj|BAB02870.1|glutamate decarboxylase [Arabidopsis thaliana]/gi|238479801|ref|NP_001154621.1|glutamate decarboxylase 5 [Arabidopsis thaliana]/gi|1032290832|gb|OAP05159.1|GAD5 [Arabidopsis thaliana]/gi|15229517|ref|NP_188403.1|glutamate decarboxylase 5 [Arabidopsis thaliana]/gi|332642483|gb|AEE76004.1|glutamate…	87.80%	NP_188403.1;BAB02870.1;AEE76003.1;AEE76004.1;Q9LSH2.1;OAP05159.1;NP_001154621.1	glutamate decarboxylase activity;calmodulin binding;nucleus;cytosol;glutamate metabolic process;plasmodesma;pyridoxal phosphate binding;response to cadmium ion	GAD5	482.572	1845	2324	482.572	contig_6307	0	454	447.075	1369	1759	447.075	contig_6307	0	454	468.8	1727	2167	468.8	contig_6307	0	454	466.149	121.629	397	486	121.629	contig_6307	0	454	124.516	330	443	124.516
contig_9106	241.301	213.394	-227.583	-6.82881	-227.583	-6.82881	519.863	1.66588e-09	3.38015e-07	cyanohydrin lyase like	1166	gi|7268419|emb|CAB78711.1|cyanohydrin lyase like protein [Arabidopsis thaliana]/gi|15235844|ref|NP_193402.1|methyl esterase 16 [Arabidopsis thaliana]/gi|332658384|gb|AEE83784.1|methyl esterase 16 [Arabidopsis thaliana]/gi|2245024|emb|CAB10444.1|cyanohydrin lyase like protein [Arabidopsis thaliana]/gi|21593888|gb|AAM65855.1|cyanohydrin lyase like protein [Arabidopsis thaliana]/gi|75318142|sp|O2351…	59.40%	AAM65855.1;CAB10444.1;O23512.1;AEE83784.1;NP_193402.1;CAB78711.1	cytosol;indoleacetic acid conjugate metabolic process;shoot system development;methyl indole-3-acetate esterase activity;methyl jasmonate esterase activity	MES16	264.867	2951	3276	264.867	contig_9106	0	1166	274.82	2533	2777	274.82	contig_9106	0	1166	260.198	2781	3089	260.198	contig_9106	0	1166	266.628	83.1203	800	853	83.1203	contig_9106	0	1166	60.849	516	556	60.849
contig_18050	106.033	22.1531	86.9613	26.3311	86.9613	26.3311	31.2895	9.06156e-05	0.000594931	copia-type poly	416	"gi|12597806|gb|AAG60117.1|AC073555_1copia-type polyprotein, putative [Arabidopsis thaliana]"	70.80%	AAG60117.1			3.39923	15	15	3.39923	contig_18050	0	416	1.94167	7	7	1.94167	contig_18050	0	416	4.95804	21	21	4.95804	contig_18050	0	416	3.43298	66.0965	242	242	66.0965	contig_18050	0	416	49.6935	162	162	49.6935
contig_8767	64.9095	21.2575	-55.7488	-4.23635	-55.7488	-4.23635	51.0062	1.46941e-05	0.000151919	B-box type zinc finger with CCT domain-containing	1528	"gi|1032294867|gb|OAP09193.1|hypothetical protein AXX17_AT2G45670 [Arabidopsis thaliana]/gi|66792604|gb|AAY56404.1|At2g47890 [Arabidopsis thaliana]/gi|15227152|ref|NP_182310.1|B-box type zinc finger protein with CCT domain-containing protein [Arabidopsis thaliana]/gi|3738301|gb|AAC63643.1|putative zinc-finger protein (B-box zinc finger domain) [Arabidopsis thaliana]/gi|20197548|gb|AAM15120.1|puta…	50.80%	AAY56404.1;NP_182310.1;OAP09193.1;AAC63643.1;O82256.1;BAH30436.1;AAM15120.1;AEC10906.1	"intracellular;regulation of transcription, DNA-templated;sequence-specific DNA binding;transcription regulatory region DNA binding"	AT2G47890	69.5934	1128	1128	69.5934	contig_8767	0	1528	78.6891	1042	1042	78.6891	contig_8767	0	1528	70.6413	1099	1099	70.6413	contig_8767	0	1528	72.9746	14.3513	193	193	14.3513	contig_8767	0	1528	13.7796	165	165	13.7796
contig_31190	105.457	60.0325	82.3901	6.35223	82.3901	6.35223	29.4687	0.000112749	0.000701689	Pectin lyase-like superfamily	573	gi|26451466|dbj|BAC42832.1|putative pectate lyase [Arabidopsis thaliana]	93.10%	BAC42832.1	extracellular region;pectate lyase activity;pectin catabolic process;metal ion binding		8.88426	53	54	8.88426	contig_31190	0	573	14.4993	72	72	14.4993	contig_31190	0	573	22.7972	133	133	22.7972	contig_31190	0	573	15.3936	92.6017	462	467	92.6017	contig_31190	0	573	86.4081	383	388	86.4081
contig_4456	52.3459	31.8506	45.4311	6.00307	45.4311	6.00307	61.0624	7.41702e-06	9.22568e-05	#NAME?	1248	gi|1032298206|gb|OAP12531.1|hypothetical protein AXX17_AT1G44770 [Arabidopsis thaliana]	70.60%	OAP12531.1	calmodulin binding;nucleus;cytosol;plasma membrane;abscisic acid-activated signaling pathway;blue light signaling pathway;response to low fluence blue light stimulus by blue low-fluence system;peptidase inhibitor activity;defense response to bacterium		21.604	286	286	21.604	contig_4456	0	1248	21.2659	228	230	21.2659	contig_4456	0	1248	20.2257	252	257	20.2257	contig_4456	0	1248	21.0318	7.64753	82	84	7.64753	contig_4456	0	1248	10.4295	99	102	10.4295
contig_4841	60.859	8.4147	-51.9709	-14.4838	-51.9709	-14.4838	60.1693	7.84581e-06	9.60755e-05	ABC transporter	1003	"gi|12320927|gb|AAG50592.1|AC083891_6ABC transporter, putative [Arabidopsis thaliana]"	81.90%	AAG50592.1	"defense response to oomycetes;protein binding;ATP binding;plasma membrane;drug transmembrane transport;response to ethylene;response to salicylic acid;response to jasmonic acid;response to ozone;lead ion transport;integral component of membrane;ATPase activity, coupled to transmembrane movement of substances;abscisic acid transport"		52.0704	554	554	52.0704	contig_4841	0	1003	54.3014	472	472	54.3014	contig_4841	0	1003	61.1038	624	624	61.1038	contig_4841	0	1003	55.8252	2.83202	25	25	2.83202	contig_4841	0	1003	5.85241	46	46	5.85241
contig_5720	72.0569	56.9664	55.9206	7.37168	55.9206	7.37168	20.8309	0.000389222	0.00181515	PYR1-like 4	1043	gi|3395441|gb|AAC28773.1|expressed protein [Arabidopsis thaliana]/gi|21592755|gb|AAM64704.1|unknown [Arabidopsis thaliana]/gi|15809748|gb|AAL06802.1|At2g38310/T19C21.20 [Arabidopsis thaliana]/gi|75099990|sp|O80920.1|PYL4_ARATHRecName: Full=Abscisic acid receptor PYL4 AltName: Full=ABI1-binding protein 2 AltName: Full=PYR1-like protein 4 AltName: Full=Regulatory components of ABA receptor 10/gi|18…	77.70%	AAL06802.1;AAC28773.1;NP_565887.1;AEC09522.1;AAM64704.1;AAK62641.1;O80920.1	protein phosphatase inhibitor activity;receptor activity;protein binding;nucleus;cytoplasm;plasma membrane;abscisic acid-activated signaling pathway;abscisic acid binding;regulation of protein serine/threonine phosphatase activity	PYL4	5.15196	57	57	5.15196	contig_5720	0	1043	7.52307	68	68	7.52307	contig_5720	0	1043	13.6543	145	145	13.6543	contig_5720	0	1043	8.77643	11.7651	108	108	11.7651	contig_5720	0	1043	10.5218	86	86	10.5218
contig_1670	346.995	256.459	-315.486	-15.0847	-315.486	-15.0847	167.439	1.47692e-07	5.73094e-06	actin cross-linking (DUF569)	534	gi|22137290|gb|AAM91490.1|At1g59710/T30E16_31 [Arabidopsis thaliana]/gi|18406433|ref|NP_564751.1|actin cross-linking protein (DUF569) [Arabidopsis thaliana]/gi|5080804|gb|AAD39313.1|AC007258_2Hypothetical protein [Arabidopsis thaliana]/gi|1032300244|gb|OAP14569.1|hypothetical protein AXX17_AT1G52790 [Arabidopsis thaliana]/gi|15010642|gb|AAK73980.1|At1g59710/T30E16_31 [Arabidopsis thaliana]/gi|332…	75.90%	NP_564751.1;AAM91490.1;AAD39313.1;AEE33606.1;OAP14569.1;AAK73980.1	nucleus;vacuole	AT1G59710	361.552	1925	2048	361.552	contig_1670	0	534	293.446	1274	1358	293.446	contig_1670	0	534	358.656	1839	1950	358.656	contig_1670	0	534	337.885	24.6816	108	116	24.6816	contig_1670	0	534	27.959	106	117	27.959
contig_4235	51.1299	42.0763	45.2486	6.02542	45.2486	6.02542	193.487	8.36015e-08	3.96101e-06	HCO3- transporter family	1356	"gi|1064245676|pdb|5L25|AChain A, Crystal Structure Of Arabidopsis Thaliana Bor1"	87.20%	5L25_A	inorganic anion exchanger activity;endosome;vacuole;integral component of plasma membrane;anion:anion antiporter activity;lateral plasma membrane;borate transmembrane transport;columella;root development;regulation of intracellular pH;cellular response to boron-containing substance levels;borate efflux transmembrane transporter activity		9.24643	133	133	9.24643	contig_4235	0	1356	12.0837	142	142	12.0837	contig_4235	0	1356	8.25714	114	114	8.25714	contig_4235	0	1356	9.86241	9.13321	109	109	9.13321	contig_4235	0	1356	9.03419	96	96	9.03419
contig_19907	59.9079	41.6947	52.0182	25.1266	52.0182	25.1266	145.404	2.57009e-07	8.46287e-06	DPP6 N-terminal domain	1298	gi|1032298257|gb|OAP12582.1|hypothetical protein AXX17_AT1G22760 [Arabidopsis thaliana]	47.43%	OAP12582.1	cell wall;vacuole		2.46937	34	34	2.46937	contig_19907	0	1298	1.95577	22	22	1.95577	contig_19907	0	1298	2.04302	27	27	2.04302	contig_19907	0	1298	2.15606	7.35295	84	84	7.35295	contig_19907	0	1298	7.9632	81	81	7.9632
contig_6308	376.551	367.493	-368.718	-7.83219	-368.718	-7.83219	2491.14	3.21621e-12	8.02568e-09	glutamate decarboxylase	422	gi|332642482|gb|AEE76003.1|glutamate decarboxylase 5 [Arabidopsis thaliana]/gi|9294589|dbj|BAB02870.1|glutamate decarboxylase [Arabidopsis thaliana]/gi|238479801|ref|NP_001154621.1|glutamate decarboxylase 5 [Arabidopsis thaliana]/gi|1032290832|gb|OAP05159.1|GAD5 [Arabidopsis thaliana]/gi|15229517|ref|NP_188403.1|glutamate decarboxylase 5 [Arabidopsis thaliana]/gi|332642483|gb|AEE76004.1|glutamate…	86.40%	NP_188403.1;BAB02870.1;AEE76003.1;AEE76004.1;Q9LSH2.1;OAP05159.1;NP_001154621.1	glutamate decarboxylase activity;calmodulin binding;nucleus;cytosol;glutamate metabolic process;plasmodesma;pyridoxal phosphate binding;response to cadmium ion	GAD5	421.766	1510	1888	421.766	contig_6308	0	422	424.101	1156	1551	424.101	contig_6308	0	422	422.191	1427	1814	422.191	contig_6308	0	422	422.686	104.466	300	388	104.466	contig_6308	0	422	94.6476	230	313	94.6476
contig_2444	64.2508	48.8737	57.1303	19.6901	57.1303	19.6901	48.8781	1.72606e-05	0.000171613	Tetratricopeptide repeat (TPR)-like superfamily	2944	"gi|332190118|gb|AEE28239.1|Tetratricopeptide repeat (TPR)-like superfamily protein [Arabidopsis thaliana]/gi|8778839|gb|AAF79838.1|AC026875_18T6D22.15 [Arabidopsis thaliana]/gi|75174869|sp|Q9LN01.1|PPR21_ARATHRecName: Full=Pentatricopeptide repeat-containing protein At1g08070, chloroplastic AltName: Full=Protein ORGANELLE TRANSCRIPT PROCESSING 82 Flags: Precursor/gi|15223099|ref|NP_172286.1|Tetr…	62.30%	NP_172286.1;AAF79838.1;Q9LN01.1;AEE28239.1	RNA binding;endonuclease activity;mitochondrion;chloroplast;chloroplast RNA processing;mitochondrial mRNA modification;chloroplast RNA modification	OTP82	2.14545	67	67	2.14545	contig_2444	0	2944	3.48837	89	89	3.48837	contig_2444	0	2944	3.53633	106	106	3.53633	contig_2444	0	2944	3.05672	13.0062	337	337	13.0062	contig_2444	0	2944	16.5145	381	381	16.5145
contig_9605	137.303	106.857	-117.463	-4.08269	-117.463	-4.08269	59.3482	8.26776e-06	9.97294e-05	sorbitol dehydrogenase	612	gi|21553353|gb|AAM62446.1|sorbitol dehydrogenase-like protein [Arabidopsis thaliana]	59.30%	AAM62446.1	cytosol;plasma membrane;zinc ion binding;plasmodesma;mitochondrial membrane;oxidation-reduction process		150.804	721	979	150.804	contig_9605	0	612	166.487	664	883	166.487	contig_9605	0	612	149.411	665	931	149.411	contig_9605	0	612	155.567	57.9242	228	312	57.9242	contig_9605	0	612	40.0338	140	192	40.0338
contig_101	99.7196	63.458	-92.2672	-4.24883	-92.2672	-4.24883	331.855	9.90574e-09	1.04447e-06	calcium-dependent kinase	1700	gi|13605617|gb|AAK32802.1|AF361634_1AT5g19450/F7K24_200 [Arabidopsis thaliana]/gi|75319419|sp|Q38873.1|CDPK7_ARATHRecName: Full=Calcium-dependent protein kinase 7 AltName: Full=Calmodulin-domain protein kinase CDPK isoform 7/gi|1032279345|gb|OAO93673.1|CPK7 [Arabidopsis thaliana]/gi|1399277|gb|AAB03247.1|calmodulin-domain protein kinase CDPK isoform 7 [Arabidopsis thaliana]/gi|332004432|gb|AED918…	90.00%	AED91815.1;CAC42909.1;Q38873.1;AAK32802.1;OAO93673.1;NP_568281.1;AAB03247.1	calmodulin-dependent protein kinase activity;calcium-dependent protein kinase C activity;calcium ion binding;calmodulin binding;ATP binding;nucleus;cytoplasm;plasma membrane;plasmodesma;response to salt stress;abscisic acid-activated signaling pathway;peptidyl-serine phosphorylation;intracellular signal transduction;protein autophosphorylation	CPK7	124.716	2249	2249	124.716	contig_101	0	1700	114.169	1682	1682	114.169	contig_101	0	1700	123.117	2131	2131	123.117	contig_101	0	1700	120.667	24.9965	374	374	24.9965	contig_101	0	1700	30.0254	400	400	30.0254
contig_7942	75.5548	29.2578	-60.6239	-6.48954	-60.6239	-6.48954	40.2378	3.58001e-05	0.000296052	---NA---	535						66.607	357	378	66.607	contig_7942	0	535	65.7834	293	305	65.7834	contig_7942	0	535	82.612	424	450	82.612	contig_7942	0	535	71.6675	12.9549	60	61	12.9549	contig_7942	0	535	13.1186	52	55	13.1186
contig_18900	110.762	58.4553	89.5899	4.60431	89.5899	4.60431	43.7737	2.61322e-05	0.000234733	Mitochondrial glyco family	470	gi|15450541|gb|AAK96448.1|AT5g05990/K18J17_19 [Arabidopsis thaliana]/gi|15239320|ref|NP_196218.1|Mitochondrial glycoprotein family protein [Arabidopsis thaliana]/gi|21553915|gb|AAM62998.1|unknown [Arabidopsis thaliana]/gi|14517391|gb|AAK62586.1|AT5g05990/K18J17_19 [Arabidopsis thaliana]/gi|332003569|gb|AED90952.1|Mitochondrial glycoprotein family protein [Arabidopsis thaliana]/gi|10177572|dbj|BAB…	68.30%	NP_196218.1;AAK62586.1;AAM62998.1;AED90952.1;BAB10804.1;AAK96448.1	mitochondrial matrix	AT5G05990	26.0752	130	130	26.0752	contig_18900	0	470	26.7608	109	109	26.7608	contig_18900	0	470	21.733	104	104	21.733	contig_18900	0	470	24.8563	97.907	405	405	97.907	contig_18900	0	470	132.495	488	488	132.495
contig_10710	70.1719	46.5756	52.3843	57.3863	52.3843	57.3863	28.1018	0.000133948	0.000801553	Calcium-dependent lipid-binding ( domain) family	616	gi|332645868|gb|AEE79389.1|Calcium-dependent lipid-binding (CaLB domain) family protein [Arabidopsis thaliana]/gi|145332861|ref|NP_001078296.1|Calcium-dependent lipid-binding (CaLB domain) family protein [Arabidopsis thaliana]	59.60%	AEE79389.1;NP_001078296.1		AT3G55470	3.06077	20	20	3.06077	contig_10710	0	616	1.49858	8	8	1.49858	contig_10710	0	616	1.75387	11	11	1.75387	contig_10710	0	616	2.10441	1.29114	7	7	1.29114	contig_10710	0	616	0.414311	2	2	0.414311
contig_9437	57.868	20.2447	52.3337	4.83982	52.3337	4.83982	102.614	1.00262e-06	2.16113e-05	Dof-type zinc finger DNA-binding family	1104	gi|1032290893|gb|OAP05220.1|OBP1 [Arabidopsis thaliana]/gi|55584036|sp|Q39088.2|DOF34_ARATHRecName: Full=Dof zinc finger protein DOF3.4 Short=AtDOF3.4 AltName: Full=OBF-binding protein 1/gi|7630027|emb|CAB88324.1|DNA binding protein [Arabidopsis thaliana]/gi|15229744|ref|NP_190610.1|OBF binding protein 1 [Arabidopsis thaliana]/gi|332645143|gb|AEE78664.1|OBF binding protein 1 [Arabidopsis thaliana]	95.50%	NP_190610.1;Q39088.2;CAB88324.1;AEE78664.1;OAP05220.1	"transcription regulatory region sequence-specific DNA binding;regionalization;transcription factor activity, sequence-specific DNA binding;protein binding;nucleus;transcription, DNA-templated;response to wounding;response to insect;response to auxin;response to salicylic acid;response to jasmonic acid;response to chitin;regulation of glucosinolate biosynthetic process;cell wall modification;posi…	OBP1	11.4424	132	134	11.4424	contig_9437	0	1104	16.7233	160	160	16.7233	contig_9437	0	1104	12.7219	142	143	12.7219	contig_9437	0	1104	13.6292	49.0915	476	477	49.0915	contig_9437	0	1104	41.6113	360	360	41.6113
contig_28970	150.364	46.7552	98.9367	5.49212	98.9367	5.49212	10.0182	0.00438286	0.0125195	---NA---	478						84.8052	430	430	84.8052	contig_28970	0	478	74.5935	309	309	74.5935	contig_28970	0	478	77.0527	375	375	77.0527	contig_28970	0	478	78.8171	25.9093	109	109	25.9093	contig_28970	0	478	19.4882	73	73	19.4882
contig_11951	890.53	703.927	-824.997	-16.6577	-824.997	-16.6577	195.967	7.95092e-08	3.83502e-06	33 kDa polypeptide of oxygen-evolving complex (OEC) in photosystem II	795	"gi|5748502|emb|CAB53092.1|precursor of the 33 kDa subunit of the oxygen evolving complex [Arabidopsis thaliana]/gi|21435971|gb|AAM51568.1|AT3g50820/F18B3_100 [Arabidopsis thaliana]/gi|332645193|gb|AEE78714.1|photosystem II subunit O-2 [Arabidopsis thaliana]/gi|15215668|gb|AAK91379.1|AT3g50820/F18B3_100 [Arabidopsis thaliana]/gi|4835233|emb|CAB42911.1|putative protein 1 photosystem II oxygen-evol…	84.30%	AAM67110.1;AAK91379.1;NP_190651.1;AEE78714.1;CAB42911.1;CAB53092.1;AAM51568.1;Q9S841.1	calcium ion binding;protein binding;poly(U) RNA binding;chloroplast thylakoid lumen;photosystem II oxygen evolving complex;photoinhibition;photosystem II assembly;oxygen evolving activity;plastoglobule;integral component of membrane;extrinsic component of membrane;chloroplast photosystem II;regulation of protein dephosphorylation;photosystem II stabilization;defense response to bacterium;apoplast	PSBO2	936.434	7897	7897	936.434	contig_11951	0	795	769.561	5302	5302	769.561	contig_11951	0	795	927.065	7504	7504	927.065	contig_11951	0	795	877.686	139.632	977	977	139.632	contig_11951	0	795	88.9242	554	554	88.9242
contig_8353	199.965	124.056	-169.252	-5.74423	-169.252	-5.74423	44.5149	2.45377e-05	0.000223585	hypothetical protein AXX17_AT1G11430	434	gi|1032304615|gb|OAP18940.1|hypothetical protein AXX17_AT1G11430 [Arabidopsis thaliana]	62.00%	OAP18940.1			232.204	1068	1069	232.204	contig_8353	0	434	163.514	614	615	163.514	contig_8353	0	434	219.063	968	968	219.063	contig_8353	0	434	204.927	42.1495	157	161	42.1495	contig_8353	0	434	32.637	111	111	32.637
contig_21144	319.32	116.254	217.793	904.614	217.793	904.614	11.8831	0.00256479	0.00813848	---NA---	455						0	0	0	0	contig_21144	0	455	0.507211	2	2	0.507211	contig_21144	0	455	0.21586	1	1	0.21586	contig_21144	0	455	0.241024	1.24858	5	5	1.24858	contig_21144	0	455	1.9632	7	7	1.9632
contig_14828	51.4548	31.0581	42.0227	5.14281	42.0227	5.14281	45.8692	2.1926e-05	0.000205299	glutathione S-transferase TAU 22	347	"gi|21554364|gb|AAM63471.1|glutathione transferase, putative [Arabidopsis thaliana]"	82.50%	AAM63471.1	"glutathione transferase activity;peroxidase activity;nucleus;vacuolar membrane;Golgi apparatus;cytosol;plasma membrane;glutathione metabolic process;response to oxidative stress;toxin catabolic process;chloroplast stroma;response to toxic substance;cellular response to water deprivation;glutathione binding;2,4,6-trinitrotoluene catabolic process;response to cadmium ion;oxidation-reduction proces…		16.844	62	62	16.844	contig_14828	0	347	17.6245	53	53	17.6245	contig_14828	0	347	16.1335	57	57	16.1335	contig_14828	0	347	16.8673	10.8054	33	33	10.8054	contig_14828	0	347	10.6646	28	29	10.6646
contig_1525	56.5957	13.8033	40.1227	4.35112	40.1227	4.35112	16.5704	0.000856759	0.00339488	P450 reductase 2	769	gi|14194163|gb|AAK56276.1|AF367288_1AT4g30210/F9N11_60 [Arabidopsis thaliana]/gi|16323348|gb|AAL15387.1|AT4g30210/F9N11_60 [Arabidopsis thaliana]	84.10%	AAK56276.1;AAL15387.1	NADPH-hemoprotein reductase activity;endoplasmic reticulum membrane;chloroplast;phenylpropanoid metabolic process;FMN binding;integral component of membrane;[methionine synthase] reductase activity;oxidation-reduction process		39.7192	318	324	39.7192	contig_1525	0	769	44.1155	283	294	44.1155	contig_1525	0	769	45.8514	344	359	45.8514	contig_1525	0	769	43.2287	9.89932	67	67	9.89932	contig_1525	0	769	12.4455	74	75	12.4455
contig_5176	76.458	34.6686	47.5816	11.7236	47.5816	11.7236	8.84805	0.00638786	0.0170706	hypothetical protein AT4G18400	1051	gi|21553498|gb|AAM62591.1|unknown [Arabidopsis thaliana]/gi|106879153|gb|ABF82606.1|At4g18400 [Arabidopsis thaliana]/gi|18415084|ref|NP_567555.1|hypothetical protein AT4G18400 [Arabidopsis thaliana]/gi|332658642|gb|AEE84042.1|hypothetical protein AT4G18400 [Arabidopsis thaliana]	79.50%	AEE84042.1;NP_567555.1;ABF82606.1;AAM62591.1	nucleus	AT4G18400	3.85698	43	43	3.85698	contig_5176	0	1051	4.50144	41	41	4.50144	contig_5176	0	1051	4.95288	53	53	4.95288	contig_5176	0	1051	4.4371	5.40535	50	50	5.40535	contig_5176	0	1051	8.98476	74	74	8.98476
contig_26455	109.322	46.3373	84.0303	4.26618	84.0303	4.26618	18.3116	0.000608945	0.00258858	---NA---	918						26.0839	254	254	26.0839	contig_26455	0	918	21.9971	175	175	21.9971	contig_26455	0	918	29.1012	272	272	29.1012	contig_26455	0	918	25.7274	131.32	1061	1061	131.32	contig_26455	0	918	114.124	821	821	114.124
contig_12354	138.163	112.777	-132.003	-13.0236	-132.003	-13.0236	232.823	4.02822e-08	2.45891e-06	Phosphate-responsive 1 family	584	gi|16323270|gb|AAL15369.1|AT5g64260/MSJ1_10 [Arabidopsis thaliana]/gi|11908088|gb|AAG41473.1|AF326891_1putative phi-1 protein [Arabidopsis thaliana]/gi|14190477|gb|AAK55719.1|AF380638_1AT5g64260/MSJ1_10 [Arabidopsis thaliana]/gi|9759402|dbj|BAB09857.1|phi-1-like protein [Arabidopsis thaliana]/gi|332010480|gb|AED97863.1|EXORDIUM like 2 [Arabidopsis thaliana]/gi|12642896|gb|AAK00390.1|AF339708_1put…	59.80%	AAK55719.1;AAL15369.1;AAM65190.1;OAO94855.1;Q9FE06.1;AAK00390.1;AED97863.1;BAB09857.1;AAG41473.1;NP_201231.1	response to hypoxia;extracellular region;Golgi apparatus;cytosol;plant-type cell wall;plasmodesma;chloroplast;response to brassinosteroid;membrane;growth;defense response to fungus	EXL2	138.502	857	858	138.502	contig_12354	0	584	144.633	731	732	144.633	contig_12354	0	584	145.811	867	867	145.811	contig_12354	0	584	142.982	16.7318	86	86	16.7318	contig_12354	0	584	7.64773	35	35	7.64773
contig_1207	132.784	95.7268	-118.265	-5.22934	-118.265	-5.22934	76.8034	3.07788e-06	4.87733e-05	---NA---	537						147.991	841	843	147.991	contig_1207	0	537	154.069	716	717	154.069	contig_1207	0	537	136.625	746	747	136.625	contig_1207	0	537	146.228	49.299	233	233	49.299	contig_1207	0	537	70.5764	297	297	70.5764
contig_16983	69.8496	16.7658	54.9892	4.54412	54.9892	4.54412	28.3315	0.000130058	0.000782587	asparagine synthetase 3	2116	gi|1032276498|gb|OAO90826.1|ASN3 [Arabidopsis thaliana]	92.80%	OAO90826.1	asparagine synthase (glutamine-hydrolyzing) activity;aspartate-ammonia ligase activity;ATP binding;cytosol;glutamine metabolic process;cellular amino acid catabolic process;plasmodesma;response to absence of light;response to sucrose;response to glucose;response to fructose;hyperosmotic salinity response;protein homodimerization activity;cellular response to sucrose starvation;L-asparagine biosyn…		15.1031	339	339	15.1031	contig_16983	0	2116	17.2868	317	317	17.2868	contig_16983	0	2116	14.1569	305	305	14.1569	contig_16983	0	2116	15.5156	68.7307	1280	1280	68.7307	contig_16983	0	2116	84.0065	1393	1393	84.0065
contig_5529	112.072	38.2933	87.7958	5.2952	87.7958	5.2952	21.516	0.000347445	0.00166037	---NA---	519						23.9767	132	132	23.9767	contig_5529	0	519	18.2313	82	82	18.2313	contig_5529	0	519	19.1134	101	101	19.1134	contig_5529	0	519	20.4404	82.5336	377	377	82.5336	contig_5529	0	519	111.872	455	455	111.872
contig_4421	55.1208	40.3485	46.8061	12.3086	46.8061	12.3086	87.9304	1.82534e-06	3.36017e-05	late embryogenesis abundant	514	gi|15081694|gb|AAK82502.1|AT5g66780/MUD21_2 [Arabidopsis thaliana]/gi|332010879|gb|AED98262.1|late embryogenesis abundant protein [Arabidopsis thaliana]/gi|18252267|gb|AAL62014.1|AT5g66780/MUD21_2 [Arabidopsis thaliana]/gi|1032276136|gb|OAO90464.1|hypothetical protein AXX17_AT5G66780 [Arabidopsis thaliana]/gi|15240077|ref|NP_201479.1|late embryogenesis abundant protein [Arabidopsis thaliana]/gi|9…	53.50%	OAO90464.1;NP_201479.1;BAB08620.1;AAK82502.1;AAL62014.1;AED98262.1		AT5G66780	4.03498	20	22	4.03498	contig_4421	0	514	5.83688	21	26	5.83688	contig_4421	0	514	3.82165	20	20	3.82165	contig_4421	0	514	4.5645	5.52629	20	25	5.52629	contig_4421	0	514	1.48959	6	6	1.48959
contig_29151	57.78	42.4464	49.8252	10.6069	49.8252	10.6069	50.3607	1.5419e-05	0.000157308	Auxin efflux carrier family	341	gi|4151321|gb|AAD04377.1|putative auxin efflux carrier protein [Arabidopsis thaliana]	86.20%	AAD04377.1	lytic vacuole;protein binding;endoplasmic reticulum;plant-type cell wall;plasmodesma;photomorphogenesis;auxin:proton symporter activity;response to ethylene;auxin-activated signaling pathway;response to glucose;flower development;basal plasma membrane;auxin polar transport;positive gravitropism;cell surface;xylem and phloem pattern formation;regulation of root meristem growth;inflorescence develo…		4.14686	15	15	4.14686	contig_29151	0	341	5.07583	15	15	5.07583	contig_29151	0	341	6.33655	21	22	6.33655	contig_29151	0	341	5.18641	13.3279	40	40	13.3279	contig_29151	0	341	19.8335	53	53	19.8335
contig_7440	3195.55	3042.6	-3141.35	-149.433	-3141.35	-149.433	5822.14	1.08136e-13	7.85498e-10	xyloglucan endotransglucosylase hydrolase 5	667	gi|4490725|emb|CAB38928.1|endo-xyloglucan transferase-like protein [Arabidopsis thaliana]/gi|22136496|gb|AAM91326.1|unknown protein [Arabidopsis thaliana]/gi|7270763|emb|CAB80445.1|endo-xyloglucan transferase-like protein [Arabidopsis thaliana]/gi|332661439|gb|AEE86839.1|xyloglucan endotransglucosylase/hydrolase 7 [Arabidopsis thaliana]/gi|20260252|gb|AAM13024.1|unknown protein [Arabidopsis thali…	80.60%	AAM13024.1;AAM91326.1;CAB38928.1;AEE86839.1;Q8LER3.2;OAO99332.1;CAB80445.1;NP_195494.1	"hydrolase activity, hydrolyzing O-glycosyl compounds;cell wall;response to water deprivation;xyloglucan metabolic process;xyloglucan:xyloglucosyl transferase activity;cell wall biogenesis;apoplast;cell wall organization"	XTH7	3185.31	22536	22537	3185.31	contig_7440	0	667	3215.54	18584	18587	3215.54	contig_7440	0	667	3086.68	20961	20962	3086.68	contig_7440	0	667	3162.51	118.901	698	698	118.901	contig_7440	0	667	115.555	604	604	115.555
contig_16019	74.8171	57.1518	66.8298	9.39826	66.8298	9.39826	168.132	1.45313e-07	5.66892e-06	DPP6 N-terminal domain	2532	"gi|5263319|gb|AAD41421.1|AC007727_10ESTs gb|N96028, gb|F14286, gb|T20680, gb|F14443, gb|AA657300 and gb|N65244 come from this gene [Arabidopsis thaliana]/gi|15028243|gb|AAK76710.1|unknown protein [Arabidopsis thaliana]/gi|23297034|gb|AAN13226.1|unknown protein [Arabidopsis thaliana]/gi|18395019|ref|NP_564147.1|DPP6 N-terminal domain-like protein [Arabidopsis thaliana]/gi|332192017|gb|AEE30138.1|…	47.43%	AEE30138.1;AAN13226.1;NP_564147.1;AAD41421.1;AAK76710.1	cell wall;vacuole	AT1G21680	12.4355	331	334	12.4355	contig_16019	0	2532	10.4818	228	230	10.4818	contig_16019	0	2532	8.6114	222	222	8.6114	contig_16019	0	2532	10.5096	9.01964	201	201	9.01964	contig_16019	0	2532	7.66051	152	152	7.66051
contig_14187	101.317	44.8686	-84.8518	-5.31482	-84.8518	-5.31482	51.0242	1.46746e-05	0.000151846	Seven transmembrane MLO family	1223	gi|1032293139|gb|OAP07465.1|MLO12 [Arabidopsis thaliana]	75.30%	OAP07465.1	"calmodulin binding;mitochondrion;Golgi apparatus;plasma membrane;cell death;plasmodesma;defense response to fungus, incompatible interaction;leaf senescence;negative regulation of defense response"		109.843	1425	1425	109.843	contig_14187	0	1223	85.5758	907	907	85.5758	contig_14187	0	1223	118.133	1471	1471	118.133	contig_14187	0	1223	104.517	16.8155	181	181	16.8155	contig_14187	0	1223	18.5725	178	178	18.5725
contig_6101	147.115	123.681	-133.717	-4.54585	-133.717	-4.54585	379.137	5.83983e-09	7.13701e-07	extracellular protease family	688	gi|15010596|gb|AAK73957.1|At2g30950/F7F1.16 [Arabidopsis thaliana]/gi|20147395|gb|AAM10407.1|At2g30950/F7F1.16 [Arabidopsis thaliana]	93.60%	AAK73957.1;AAM10407.1	ATP-dependent peptidase activity;metalloendopeptidase activity;ATP binding;mitochondrion;proteolysis;multicellular organism development;zinc ion binding;chloroplast thylakoid membrane;response to cytokinin;chloroplast envelope;thylakoid membrane organization;photoinhibition;photosystem II repair;PSII associated light-harvesting complex II catabolic process;integral component of membrane;thylakoid…		164.702	1202	1202	164.702	contig_6101	0	688	180.13	1074	1074	180.13	contig_6101	0	688	169.452	1187	1187	169.452	contig_6101	0	688	171.428	38.3139	232	232	38.3139	contig_6101	0	688	33.0148	178	178	33.0148
contig_6764	53.7885	21.7143	41.3893	5.80017	41.3893	5.80017	16.3029	0.000905324	0.00354784	NAD(P)-binding Rossmann-fold superfamily	1168	"gi|15233747|ref|NP_194153.1|NAD(P)-binding Rossmann-fold superfamily protein [Arabidopsis thaliana]/gi|332659468|gb|AEE84868.1|NAD(P)-binding Rossmann-fold superfamily protein [Arabidopsis thaliana]/gi|30725632|gb|AAP37838.1|At4g24220 [Arabidopsis thaliana]/gi|7269272|emb|CAB79332.1|putative protein [Arabidopsis thaliana]/gi|17064750|gb|AAL32529.1|putative protein [Arabidopsis thaliana]/gi|21592…	66.33%	AEE84868.1;ABU55811.1;AAL32529.1;AAP37838.1;AAM64873.1;NP_194153.1;CAB45057.1;CAB79332.1;Q9STX2.1;OAO99094.1	cytosol;steroid metabolic process;response to wounding;xylem and phloem pattern formation;enone reductase activity	VEP1	9.68546	120	120	9.68546	contig_6764	0	1168	9.28657	94	94	9.28657	contig_6764	0	1168	6.89533	82	82	6.89533	contig_6764	0	1168	8.62246	33.6581	346	346	33.6581	contig_6764	0	1168	33.9778	311	311	33.9778
contig_24211	64.9702	20.6874	56.3533	5.79813	56.3533	5.79813	99.4206	1.13371e-06	2.35731e-05	LOW : UPF0503 (DUF740)	2241	gi|1032276818|gb|OAO91146.1|hypothetical protein AXX17_AT5G00180 [Arabidopsis thaliana]	51.30%	OAO91146.1	phloem development;phloem transport;cotyledon vascular tissue pattern formation;apical plasma membrane;root system development		9.00231	214	214	9.00231	contig_24211	0	2241	12.8212	249	249	12.8212	contig_24211	0	2241	13.4111	306	306	13.4111	contig_24211	0	2241	11.7449	73.9725	1459	1459	73.9725	contig_24211	0	2241	69.8683	1227	1227	69.8683
contig_2102	53.4644	33.7727	46.542	15.8619	46.542	15.8619	79.3539	2.71369e-06	4.44424e-05	pathogenesis-related family	1184	gi|1039008969|gb|ANM59053.1|pathogenesis-related family protein [Arabidopsis thaliana]/gi|1039008970|gb|AEE36151.2|pathogenesis-related family protein [Arabidopsis thaliana]/gi|1063696032|ref|NP_001321447.1|pathogenesis-related family protein [Arabidopsis thaliana]/gi|1063678582|ref|NP_001319407.1|pathogenesis-related family protein [Arabidopsis thaliana]	79.33%	ANM59053.1;NP_001319407.1;AEE36151.2;NP_001321447.1	cytoplasm	AT1G78780	17.5963	221	221	17.5963	contig_2102	0	1184	17.1526	176	176	17.1526	contig_2102	0	1184	16.1759	195	195	16.1759	contig_2102	0	1184	16.975	6.33358	66	66	6.33358	contig_2102	0	1184	1.18555	11	11	1.18555
contig_810	151.855	117.894	-144.455	-7.07333	-144.455	-7.07333	476.978	2.34601e-09	4.23731e-07	Integrin-linked kinase family	1651	gi|42569534|ref|NP_180739.2|Integrin-linked protein kinase family [Arabidopsis thaliana]/gi|1032295314|gb|OAP09640.1|hypothetical protein AXX17_AT2G28010 [Arabidopsis thaliana]/gi|95147274|gb|ABF57272.1|At2g31800 [Arabidopsis thaliana]/gi|330253491|gb|AEC08585.1|Integrin-linked protein kinase family [Arabidopsis thaliana]	86.50%	NP_180739.2;AEC08585.1;ABF57272.1;OAP09640.1	protein serine/threonine kinase activity;protein serine/threonine/tyrosine kinase activity;signal transducer activity;protein binding;ATP binding;endoplasmic reticulum;response to osmotic stress;integrin-mediated signaling pathway;cytoplasmic side of plasma membrane;intracellular signal transduction;innate immune response;protein autophosphorylation	AT2G31800	171.071	2996	2996	171.071	contig_810	0	1651	159.702	2285	2285	159.702	contig_810	0	1651	173.946	2924	2924	173.946	contig_810	0	1651	168.24	22.091	321	321	22.091	contig_810	0	1651	23.0328	298	298	23.0328
contig_328	84.8759	29.544	-60.4312	-5.76044	-60.4312	-5.76044	20.2102	0.000432623	0.0019715	---NA---	636						57.9564	391	391	57.9564	contig_328	0	636	94.7073	522	522	94.7073	contig_328	0	636	66.7131	432	432	66.7131	contig_328	0	636	73.1256	13.9346	78	78	13.9346	contig_328	0	636	9.83143	49	49	9.83143
contig_7040	49.8289	30.5568	45.0507	11.0979	45.0507	11.0979	86.7531	1.92308e-06	3.48534e-05	Raffinose synthase family	665	gi|332646145|gb|AEE79666.1|seed imbibition 2 [Arabidopsis thaliana]/gi|42572711|ref|NP_974451.1|seed imbibition 2 [Arabidopsis thaliana]	75.40%	NP_974451.1;AEE79666.1	mRNA binding;response to oxidative stress;response to cold;plasmodesma;chloroplast;raffinose catabolic process;galactinol-sucrose galactosyltransferase activity;raffinose alpha-galactosidase activity;response to karrikin	SIP2	5.38696	38	38	5.38696	contig_7040	0	665	3.12335	18	18	3.12335	contig_7040	0	665	4.8739	33	33	4.8739	contig_7040	0	665	4.46141	24.9453	146	146	24.9453	contig_7040	0	665	21.6837	113	113	21.6837
[truncated: 2,626 more rows]
[truncated: 55 more columns]

## Sheet: qPCR validation
	log2 FC NRQs	log2 FC RPKM
contig_9978	-3.90067	-2.44801
contig_11349	-4.82832	-2.58384
contig_27738	-5.41874	-3.73076
contig_31490	-4.6743	-4.16309
contig_35897	-9.71792	-7.78514
contig_4597	-4.21374	-3.42341
contig_25850	-1.72951	-1.45782
contig_7440	-7.50441	-5.9702
contig_9978	-0.151106	-0.0580448
contig_11349	-3.7445	-2.5179
contig_27738	-1.50312	-1.2272
contig_31490	-0.816458	-1.07946
contig_35897	-1.83216	-1.83635
contig_4597	-2.24534	-2.01269
contig_25850	3.18137	2.65648
contig_7440	-1.9842	-1.34132
contig_9978	0.0268494	0.419017
contig_11349	0.408908	-0.325606
contig_27738	-0.384148	-0.186319
contig_31490	-0.0779221	-0.395712
contig_35897	0.60345	0
contig_4597	0	-0.0233291
contig_25850	0	2.1314
contig_7440	0.674687	1.25316

## Sheet: C1
Feature ID	Gene name	Gene symbol	0D-1	0D-2	0D-3	1D-1	1D-2	1D-3	10D-1	10D-2	10D-3	34D-1	34D-2	34D-3	0D Means	1D Means	10D Means	34D Means	FC 34D vs 0D	log2FC 34D vs 0D	Avg	StDev	0D Rescaled	1D Rescaled	10D Rescaled	34D Rescaled
[truncated: 428 more rows]

[truncated: 7 more sheets: C2, C3, C4, C5, C6, C7, DEGs for each comparison]
